# Supplementary material for: Characteristics and determinants of pulmonary long COVID
Source: JCI Insight. 2024 Apr 23;9(10):e177518. doi: 10.1172/jci.insight.177518 (PMC11141907; doi:10.1172/jci.insight.177518)
Supplement: Supporting data values [file jciinsight-9-177518-s250.xlsx]

## Sheet: Figure 2A-C
deidentified_patient_id	pft_lab	baseline_disease_diffusion_capacity_state_binary	baseline_disease_restriction_state	timepoint	lab_measurement_value	pft_lab_timepoint
845	ppTLC (%)	Diffusion Impaired (≤80% DLCO)	No Restriction (>80% TLC)	1st	99	1st ppTLC (%)
845	ppDLCO (%)	Diffusion Impaired (≤80% DLCO)	No Restriction (>80% TLC)	1st	64	1st ppDLCO (%)
845	ppFVC (%)	Diffusion Impaired (≤80% DLCO)	No Restriction (>80% TLC)	1st	87	1st ppFVC (%)
845	ppRV (%)	Diffusion Impaired (≤80% DLCO)	No Restriction (>80% TLC)	1st	112	1st ppRV (%)
845	ppFEV1 (%)	Diffusion Impaired (≤80% DLCO)	No Restriction (>80% TLC)	1st	105	1st ppFEV1 (%)
845	ppFEF 25/75 (%)	Diffusion Impaired (≤80% DLCO)	No Restriction (>80% TLC)	1st	161	1st ppFEF 25/75 (%)
73	ppTLC (%)	Diffusion Normal (>80% DLCO)	No Restriction (>80% TLC)	1st	85	1st ppTLC (%)
73	ppDLCO (%)	Diffusion Normal (>80% DLCO)	No Restriction (>80% TLC)	1st	81	1st ppDLCO (%)
73	ppFVC (%)	Diffusion Normal (>80% DLCO)	No Restriction (>80% TLC)	1st	106	1st ppFVC (%)
73	ppRV (%)	Diffusion Normal (>80% DLCO)	No Restriction (>80% TLC)	1st	59	1st ppRV (%)
73	ppFEV1 (%)	Diffusion Normal (>80% DLCO)	No Restriction (>80% TLC)	1st	96	1st ppFEV1 (%)
73	ppFEF 25/75 (%)	Diffusion Normal (>80% DLCO)	No Restriction (>80% TLC)	1st	63	1st ppFEF 25/75 (%)
73	ppTLC (%)	Diffusion Normal (>80% DLCO)	No Restriction (>80% TLC)	2nd	85	2nd ppTLC (%)
73	ppDLCO (%)	Diffusion Normal (>80% DLCO)	No Restriction (>80% TLC)	2nd	87	2nd ppDLCO (%)
73	ppFVC (%)	Diffusion Normal (>80% DLCO)	No Restriction (>80% TLC)	2nd	100	2nd ppFVC (%)
73	ppRV (%)	Diffusion Normal (>80% DLCO)	No Restriction (>80% TLC)	2nd	70	2nd ppRV (%)
73	ppFEV1 (%)	Diffusion Normal (>80% DLCO)	No Restriction (>80% TLC)	2nd	94	2nd ppFEV1 (%)
73	ppFEF 25/75 (%)	Diffusion Normal (>80% DLCO)	No Restriction (>80% TLC)	2nd	74	2nd ppFEF 25/75 (%)
6	ppTLC (%)	Diffusion Impaired (≤80% DLCO)	Moderate Restriction (51-70% TLC)	1st	53	1st ppTLC (%)
6	ppDLCO (%)	Diffusion Impaired (≤80% DLCO)	Moderate Restriction (51-70% TLC)	1st	69	1st ppDLCO (%)
6	ppFVC (%)	Diffusion Impaired (≤80% DLCO)	Moderate Restriction (51-70% TLC)	1st	78	1st ppFVC (%)
6	ppRV (%)	Diffusion Impaired (≤80% DLCO)	Moderate Restriction (51-70% TLC)	1st	28	1st ppRV (%)
6	ppFEV1 (%)	Diffusion Impaired (≤80% DLCO)	Moderate Restriction (51-70% TLC)	1st	76	1st ppFEV1 (%)
6	ppFEF 25/75 (%)	Diffusion Impaired (≤80% DLCO)	Moderate Restriction (51-70% TLC)	1st	69	1st ppFEF 25/75 (%)
6	ppDLCO (%)	Diffusion Impaired (≤80% DLCO)	Moderate Restriction (51-70% TLC)	2nd	69	2nd ppDLCO (%)
6	ppFVC (%)	Diffusion Impaired (≤80% DLCO)	Moderate Restriction (51-70% TLC)	2nd	68	2nd ppFVC (%)
6	ppFEV1 (%)	Diffusion Impaired (≤80% DLCO)	Moderate Restriction (51-70% TLC)	2nd	71	2nd ppFEV1 (%)
6	ppFEF 25/75 (%)	Diffusion Impaired (≤80% DLCO)	Moderate Restriction (51-70% TLC)	2nd	89	2nd ppFEF 25/75 (%)
27	ppTLC (%)	Diffusion Impaired (≤80% DLCO)	No Restriction (>80% TLC)	1st	122	1st ppTLC (%)
27	ppDLCO (%)	Diffusion Impaired (≤80% DLCO)	No Restriction (>80% TLC)	1st	79	1st ppDLCO (%)
27	ppFVC (%)	Diffusion Impaired (≤80% DLCO)	No Restriction (>80% TLC)	1st	62	1st ppFVC (%)
27	ppRV (%)	Diffusion Impaired (≤80% DLCO)	No Restriction (>80% TLC)	1st	238	1st ppRV (%)
27	ppFEV1 (%)	Diffusion Impaired (≤80% DLCO)	No Restriction (>80% TLC)	1st	65	1st ppFEV1 (%)
27	ppFEF 25/75 (%)	Diffusion Impaired (≤80% DLCO)	No Restriction (>80% TLC)	1st	94	1st ppFEF 25/75 (%)
40	ppTLC (%)	Diffusion Impaired (≤80% DLCO)	Severe Restriction (≤50% TLC)	1st	42	1st ppTLC (%)
40	ppDLCO (%)	Diffusion Impaired (≤80% DLCO)	Severe Restriction (≤50% TLC)	1st	62	1st ppDLCO (%)
40	ppFVC (%)	Diffusion Impaired (≤80% DLCO)	Severe Restriction (≤50% TLC)	1st	64	1st ppFVC (%)
40	ppRV (%)	Diffusion Impaired (≤80% DLCO)	Severe Restriction (≤50% TLC)	1st	18	1st ppRV (%)
40	ppFEV1 (%)	Diffusion Impaired (≤80% DLCO)	Severe Restriction (≤50% TLC)	1st	56	1st ppFEV1 (%)
40	ppFEF 25/75 (%)	Diffusion Impaired (≤80% DLCO)	Severe Restriction (≤50% TLC)	1st	32	1st ppFEF 25/75 (%)
76	ppTLC (%)	Diffusion Impaired (≤80% DLCO)	Moderate Restriction (51-70% TLC)	1st	70	1st ppTLC (%)
76	ppDLCO (%)	Diffusion Impaired (≤80% DLCO)	Moderate Restriction (51-70% TLC)	1st	70	1st ppDLCO (%)
76	ppFVC (%)	Diffusion Impaired (≤80% DLCO)	Moderate Restriction (51-70% TLC)	1st	77	1st ppFVC (%)
76	ppRV (%)	Diffusion Impaired (≤80% DLCO)	Moderate Restriction (51-70% TLC)	1st	50	1st ppRV (%)
76	ppFEV1 (%)	Diffusion Impaired (≤80% DLCO)	Moderate Restriction (51-70% TLC)	1st	76	1st ppFEV1 (%)
76	ppFEF 25/75 (%)	Diffusion Impaired (≤80% DLCO)	Moderate Restriction (51-70% TLC)	1st	77	1st ppFEF 25/75 (%)
76	ppTLC (%)	Diffusion Impaired (≤80% DLCO)	Moderate Restriction (51-70% TLC)	2nd	81	2nd ppTLC (%)
76	ppDLCO (%)	Diffusion Impaired (≤80% DLCO)	Moderate Restriction (51-70% TLC)	2nd	88	2nd ppDLCO (%)
76	ppFVC (%)	Diffusion Impaired (≤80% DLCO)	Moderate Restriction (51-70% TLC)	2nd	81	2nd ppFVC (%)
76	ppRV (%)	Diffusion Impaired (≤80% DLCO)	Moderate Restriction (51-70% TLC)	2nd	70	2nd ppRV (%)
76	ppFEV1 (%)	Diffusion Impaired (≤80% DLCO)	Moderate Restriction (51-70% TLC)	2nd	74	2nd ppFEV1 (%)
76	ppFEF 25/75 (%)	Diffusion Impaired (≤80% DLCO)	Moderate Restriction (51-70% TLC)	2nd	64	2nd ppFEF 25/75 (%)
865	ppTLC (%)	Diffusion Impaired (≤80% DLCO)	Mild Restriction (71-80% TLC)	1st	76	1st ppTLC (%)
865	ppDLCO (%)	Diffusion Impaired (≤80% DLCO)	Mild Restriction (71-80% TLC)	1st	72	1st ppDLCO (%)
865	ppFVC (%)	Diffusion Impaired (≤80% DLCO)	Mild Restriction (71-80% TLC)	1st	100	1st ppFVC (%)
865	ppRV (%)	Diffusion Impaired (≤80% DLCO)	Mild Restriction (71-80% TLC)	1st	43	1st ppRV (%)
865	ppFEV1 (%)	Diffusion Impaired (≤80% DLCO)	Mild Restriction (71-80% TLC)	1st	106	1st ppFEV1 (%)
865	ppFEF 25/75 (%)	Diffusion Impaired (≤80% DLCO)	Mild Restriction (71-80% TLC)	1st	134	1st ppFEF 25/75 (%)
865	ppTLC (%)	Diffusion Impaired (≤80% DLCO)	Mild Restriction (71-80% TLC)	2nd	73	2nd ppTLC (%)
865	ppDLCO (%)	Diffusion Impaired (≤80% DLCO)	Mild Restriction (71-80% TLC)	2nd	90	2nd ppDLCO (%)
865	ppFVC (%)	Diffusion Impaired (≤80% DLCO)	Mild Restriction (71-80% TLC)	2nd	92	2nd ppFVC (%)
865	ppRV (%)	Diffusion Impaired (≤80% DLCO)	Mild Restriction (71-80% TLC)	2nd	44	2nd ppRV (%)
865	ppFEV1 (%)	Diffusion Impaired (≤80% DLCO)	Mild Restriction (71-80% TLC)	2nd	96	2nd ppFEV1 (%)
865	ppFEF 25/75 (%)	Diffusion Impaired (≤80% DLCO)	Mild Restriction (71-80% TLC)	2nd	116	2nd ppFEF 25/75 (%)
871	ppTLC (%)	Diffusion Normal (>80% DLCO)	Mild Restriction (71-80% TLC)	1st	71	1st ppTLC (%)
871	ppDLCO (%)	Diffusion Normal (>80% DLCO)	Mild Restriction (71-80% TLC)	1st	92	1st ppDLCO (%)
871	ppFVC (%)	Diffusion Normal (>80% DLCO)	Mild Restriction (71-80% TLC)	1st	104	1st ppFVC (%)
871	ppRV (%)	Diffusion Normal (>80% DLCO)	Mild Restriction (71-80% TLC)	1st	41	1st ppRV (%)
871	ppFEV1 (%)	Diffusion Normal (>80% DLCO)	Mild Restriction (71-80% TLC)	1st	112	1st ppFEV1 (%)
871	ppFEF 25/75 (%)	Diffusion Normal (>80% DLCO)	Mild Restriction (71-80% TLC)	1st	153	1st ppFEF 25/75 (%)
88	ppTLC (%)	Diffusion Normal (>80% DLCO)	Mild Restriction (71-80% TLC)	1st	74	1st ppTLC (%)
88	ppDLCO (%)	Diffusion Normal (>80% DLCO)	Mild Restriction (71-80% TLC)	1st	81	1st ppDLCO (%)
88	ppFVC (%)	Diffusion Normal (>80% DLCO)	Mild Restriction (71-80% TLC)	1st	90	1st ppFVC (%)
88	ppRV (%)	Diffusion Normal (>80% DLCO)	Mild Restriction (71-80% TLC)	1st	54	1st ppRV (%)
88	ppFEV1 (%)	Diffusion Normal (>80% DLCO)	Mild Restriction (71-80% TLC)	1st	96	1st ppFEV1 (%)
88	ppFEF 25/75 (%)	Diffusion Normal (>80% DLCO)	Mild Restriction (71-80% TLC)	1st	110	1st ppFEF 25/75 (%)
70	ppTLC (%)	Diffusion Impaired (≤80% DLCO)	Moderate Restriction (51-70% TLC)	1st	63	1st ppTLC (%)
70	ppDLCO (%)	Diffusion Impaired (≤80% DLCO)	Moderate Restriction (51-70% TLC)	1st	75	1st ppDLCO (%)
70	ppFVC (%)	Diffusion Impaired (≤80% DLCO)	Moderate Restriction (51-70% TLC)	1st	68	1st ppFVC (%)
70	ppRV (%)	Diffusion Impaired (≤80% DLCO)	Moderate Restriction (51-70% TLC)	1st	39	1st ppRV (%)
70	ppFEV1 (%)	Diffusion Impaired (≤80% DLCO)	Moderate Restriction (51-70% TLC)	1st	59	1st ppFEV1 (%)
70	ppFEF 25/75 (%)	Diffusion Impaired (≤80% DLCO)	Moderate Restriction (51-70% TLC)	1st	51	1st ppFEF 25/75 (%)
70	ppTLC (%)	Diffusion Impaired (≤80% DLCO)	Moderate Restriction (51-70% TLC)	2nd	73	2nd ppTLC (%)
70	ppDLCO (%)	Diffusion Impaired (≤80% DLCO)	Moderate Restriction (51-70% TLC)	2nd	78	2nd ppDLCO (%)
70	ppFVC (%)	Diffusion Impaired (≤80% DLCO)	Moderate Restriction (51-70% TLC)	2nd	78	2nd ppFVC (%)
70	ppRV (%)	Diffusion Impaired (≤80% DLCO)	Moderate Restriction (51-70% TLC)	2nd	47	2nd ppRV (%)
70	ppFEV1 (%)	Diffusion Impaired (≤80% DLCO)	Moderate Restriction (51-70% TLC)	2nd	47	2nd ppFEV1 (%)
70	ppFEF 25/75 (%)	Diffusion Impaired (≤80% DLCO)	Moderate Restriction (51-70% TLC)	2nd	35	2nd ppFEF 25/75 (%)
36	ppTLC (%)	Diffusion Impaired (≤80% DLCO)	Moderate Restriction (51-70% TLC)	1st	65	1st ppTLC (%)
36	ppDLCO (%)	Diffusion Impaired (≤80% DLCO)	Moderate Restriction (51-70% TLC)	1st	48	1st ppDLCO (%)
36	ppFVC (%)	Diffusion Impaired (≤80% DLCO)	Moderate Restriction (51-70% TLC)	1st	75	1st ppFVC (%)
36	ppRV (%)	Diffusion Impaired (≤80% DLCO)	Moderate Restriction (51-70% TLC)	1st	57	1st ppRV (%)
36	ppFEV1 (%)	Diffusion Impaired (≤80% DLCO)	Moderate Restriction (51-70% TLC)	1st	76	1st ppFEV1 (%)
36	ppFEF 25/75 (%)	Diffusion Impaired (≤80% DLCO)	Moderate Restriction (51-70% TLC)	1st	85	1st ppFEF 25/75 (%)
867	ppTLC (%)	Diffusion Impaired (≤80% DLCO)	Severe Restriction (≤50% TLC)	1st	38	1st ppTLC (%)
867	ppDLCO (%)	Diffusion Impaired (≤80% DLCO)	Severe Restriction (≤50% TLC)	1st	46	1st ppDLCO (%)
867	ppFVC (%)	Diffusion Impaired (≤80% DLCO)	Severe Restriction (≤50% TLC)	1st	55	1st ppFVC (%)
867	ppRV (%)	Diffusion Impaired (≤80% DLCO)	Severe Restriction (≤50% TLC)	1st	18	1st ppRV (%)
867	ppFEV1 (%)	Diffusion Impaired (≤80% DLCO)	Severe Restriction (≤50% TLC)	1st	50	1st ppFEV1 (%)
867	ppFEF 25/75 (%)	Diffusion Impaired (≤80% DLCO)	Severe Restriction (≤50% TLC)	1st	44	1st ppFEF 25/75 (%)
867	ppTLC (%)	Diffusion Impaired (≤80% DLCO)	Severe Restriction (≤50% TLC)	2nd	48	2nd ppTLC (%)
867	ppDLCO (%)	Diffusion Impaired (≤80% DLCO)	Severe Restriction (≤50% TLC)	2nd	49	2nd ppDLCO (%)
867	ppFVC (%)	Diffusion Impaired (≤80% DLCO)	Severe Restriction (≤50% TLC)	2nd	59	2nd ppFVC (%)
867	ppRV (%)	Diffusion Impaired (≤80% DLCO)	Severe Restriction (≤50% TLC)	2nd	40	2nd ppRV (%)
867	ppFEV1 (%)	Diffusion Impaired (≤80% DLCO)	Severe Restriction (≤50% TLC)	2nd	58	2nd ppFEV1 (%)
867	ppFEF 25/75 (%)	Diffusion Impaired (≤80% DLCO)	Severe Restriction (≤50% TLC)	2nd	45	2nd ppFEF 25/75 (%)
117	ppTLC (%)	Diffusion Normal (>80% DLCO)	No Restriction (>80% TLC)	1st	94	1st ppTLC (%)
117	ppDLCO (%)	Diffusion Normal (>80% DLCO)	No Restriction (>80% TLC)	1st	112	1st ppDLCO (%)
117	ppFVC (%)	Diffusion Normal (>80% DLCO)	No Restriction (>80% TLC)	1st	98	1st ppFVC (%)
117	ppRV (%)	Diffusion Normal (>80% DLCO)	No Restriction (>80% TLC)	1st	86	1st ppRV (%)
117	ppFEV1 (%)	Diffusion Normal (>80% DLCO)	No Restriction (>80% TLC)	1st	108	1st ppFEV1 (%)
117	ppFEF 25/75 (%)	Diffusion Normal (>80% DLCO)	No Restriction (>80% TLC)	1st	155	1st ppFEF 25/75 (%)
39	ppTLC (%)	Diffusion Impaired (≤80% DLCO)	Moderate Restriction (51-70% TLC)	1st	66	1st ppTLC (%)
39	ppDLCO (%)	Diffusion Impaired (≤80% DLCO)	Moderate Restriction (51-70% TLC)	1st	76	1st ppDLCO (%)
39	ppFVC (%)	Diffusion Impaired (≤80% DLCO)	Moderate Restriction (51-70% TLC)	1st	79	1st ppFVC (%)
39	ppRV (%)	Diffusion Impaired (≤80% DLCO)	Moderate Restriction (51-70% TLC)	1st	29	1st ppRV (%)
39	ppFEV1 (%)	Diffusion Impaired (≤80% DLCO)	Moderate Restriction (51-70% TLC)	1st	83	1st ppFEV1 (%)
39	ppFEF 25/75 (%)	Diffusion Impaired (≤80% DLCO)	Moderate Restriction (51-70% TLC)	1st	98	1st ppFEF 25/75 (%)
39	ppTLC (%)	Diffusion Impaired (≤80% DLCO)	Moderate Restriction (51-70% TLC)	2nd	88	2nd ppTLC (%)
39	ppDLCO (%)	Diffusion Impaired (≤80% DLCO)	Moderate Restriction (51-70% TLC)	2nd	95	2nd ppDLCO (%)
39	ppFVC (%)	Diffusion Impaired (≤80% DLCO)	Moderate Restriction (51-70% TLC)	2nd	87	2nd ppFVC (%)
39	ppRV (%)	Diffusion Impaired (≤80% DLCO)	Moderate Restriction (51-70% TLC)	2nd	73	2nd ppRV (%)
39	ppFEV1 (%)	Diffusion Impaired (≤80% DLCO)	Moderate Restriction (51-70% TLC)	2nd	96	2nd ppFEV1 (%)
39	ppFEF 25/75 (%)	Diffusion Impaired (≤80% DLCO)	Moderate Restriction (51-70% TLC)	2nd	137	2nd ppFEF 25/75 (%)
100	ppTLC (%)	Diffusion Normal (>80% DLCO)	No Restriction (>80% TLC)	1st	104	1st ppTLC (%)
100	ppDLCO (%)	Diffusion Normal (>80% DLCO)	No Restriction (>80% TLC)	1st	82	1st ppDLCO (%)
100	ppFVC (%)	Diffusion Normal (>80% DLCO)	No Restriction (>80% TLC)	1st	110	1st ppFVC (%)
100	ppRV (%)	Diffusion Normal (>80% DLCO)	No Restriction (>80% TLC)	1st	90	1st ppRV (%)
100	ppFEV1 (%)	Diffusion Normal (>80% DLCO)	No Restriction (>80% TLC)	1st	103	1st ppFEV1 (%)
100	ppFEF 25/75 (%)	Diffusion Normal (>80% DLCO)	No Restriction (>80% TLC)	1st	78	1st ppFEF 25/75 (%)
106	ppTLC (%)	Diffusion Impaired (≤80% DLCO)	Moderate Restriction (51-70% TLC)	1st	66	1st ppTLC (%)
106	ppDLCO (%)	Diffusion Impaired (≤80% DLCO)	Moderate Restriction (51-70% TLC)	1st	34	1st ppDLCO (%)
106	ppFVC (%)	Diffusion Impaired (≤80% DLCO)	Moderate Restriction (51-70% TLC)	1st	80	1st ppFVC (%)
106	ppRV (%)	Diffusion Impaired (≤80% DLCO)	Moderate Restriction (51-70% TLC)	1st	59	1st ppRV (%)
106	ppFEV1 (%)	Diffusion Impaired (≤80% DLCO)	Moderate Restriction (51-70% TLC)	1st	83	1st ppFEV1 (%)
106	ppFEF 25/75 (%)	Diffusion Impaired (≤80% DLCO)	Moderate Restriction (51-70% TLC)	1st	100	1st ppFEF 25/75 (%)
106	ppTLC (%)	Diffusion Impaired (≤80% DLCO)	Moderate Restriction (51-70% TLC)	2nd	53	2nd ppTLC (%)
106	ppDLCO (%)	Diffusion Impaired (≤80% DLCO)	Moderate Restriction (51-70% TLC)	2nd	50	2nd ppDLCO (%)
106	ppFVC (%)	Diffusion Impaired (≤80% DLCO)	Moderate Restriction (51-70% TLC)	2nd	72	2nd ppFVC (%)
106	ppRV (%)	Diffusion Impaired (≤80% DLCO)	Moderate Restriction (51-70% TLC)	2nd	36	2nd ppRV (%)
106	ppFEV1 (%)	Diffusion Impaired (≤80% DLCO)	Moderate Restriction (51-70% TLC)	2nd	75	2nd ppFEV1 (%)
106	ppFEF 25/75 (%)	Diffusion Impaired (≤80% DLCO)	Moderate Restriction (51-70% TLC)	2nd	91	2nd ppFEF 25/75 (%)
106	ppTLC (%)	Diffusion Impaired (≤80% DLCO)	Moderate Restriction (51-70% TLC)	3rd	57	3rd ppTLC (%)
106	ppDLCO (%)	Diffusion Impaired (≤80% DLCO)	Moderate Restriction (51-70% TLC)	3rd	58	3rd ppDLCO (%)
106	ppFVC (%)	Diffusion Impaired (≤80% DLCO)	Moderate Restriction (51-70% TLC)	3rd	79	3rd ppFVC (%)
106	ppRV (%)	Diffusion Impaired (≤80% DLCO)	Moderate Restriction (51-70% TLC)	3rd	37	3rd ppRV (%)
106	ppFEV1 (%)	Diffusion Impaired (≤80% DLCO)	Moderate Restriction (51-70% TLC)	3rd	81	3rd ppFEV1 (%)
106	ppFEF 25/75 (%)	Diffusion Impaired (≤80% DLCO)	Moderate Restriction (51-70% TLC)	3rd	95	3rd ppFEF 25/75 (%)
5	ppTLC (%)	Diffusion Impaired (≤80% DLCO)	Severe Restriction (≤50% TLC)	1st	43	1st ppTLC (%)
5	ppDLCO (%)	Diffusion Impaired (≤80% DLCO)	Severe Restriction (≤50% TLC)	1st	62	1st ppDLCO (%)
5	ppFVC (%)	Diffusion Impaired (≤80% DLCO)	Severe Restriction (≤50% TLC)	1st	53	1st ppFVC (%)
5	ppRV (%)	Diffusion Impaired (≤80% DLCO)	Severe Restriction (≤50% TLC)	1st	23	1st ppRV (%)
5	ppFEV1 (%)	Diffusion Impaired (≤80% DLCO)	Severe Restriction (≤50% TLC)	1st	60	1st ppFEV1 (%)
5	ppFEF 25/75 (%)	Diffusion Impaired (≤80% DLCO)	Severe Restriction (≤50% TLC)	1st	83	1st ppFEF 25/75 (%)
5	ppTLC (%)	Diffusion Impaired (≤80% DLCO)	Severe Restriction (≤50% TLC)	2nd	58	2nd ppTLC (%)
5	ppDLCO (%)	Diffusion Impaired (≤80% DLCO)	Severe Restriction (≤50% TLC)	2nd	88	2nd ppDLCO (%)
5	ppFVC (%)	Diffusion Impaired (≤80% DLCO)	Severe Restriction (≤50% TLC)	2nd	66	2nd ppFVC (%)
5	ppRV (%)	Diffusion Impaired (≤80% DLCO)	Severe Restriction (≤50% TLC)	2nd	41	2nd ppRV (%)
5	ppFEV1 (%)	Diffusion Impaired (≤80% DLCO)	Severe Restriction (≤50% TLC)	2nd	76	2nd ppFEV1 (%)
5	ppFEF 25/75 (%)	Diffusion Impaired (≤80% DLCO)	Severe Restriction (≤50% TLC)	2nd	119	2nd ppFEF 25/75 (%)
5	ppTLC (%)	Diffusion Impaired (≤80% DLCO)	Severe Restriction (≤50% TLC)	3rd	86	3rd ppTLC (%)
5	ppDLCO (%)	Diffusion Impaired (≤80% DLCO)	Severe Restriction (≤50% TLC)	3rd	80	3rd ppDLCO (%)
5	ppFVC (%)	Diffusion Impaired (≤80% DLCO)	Severe Restriction (≤50% TLC)	3rd	73	3rd ppFVC (%)
5	ppRV (%)	Diffusion Impaired (≤80% DLCO)	Severe Restriction (≤50% TLC)	3rd	111	3rd ppRV (%)
5	ppFEV1 (%)	Diffusion Impaired (≤80% DLCO)	Severe Restriction (≤50% TLC)	3rd	86	3rd ppFEV1 (%)
5	ppFEF 25/75 (%)	Diffusion Impaired (≤80% DLCO)	Severe Restriction (≤50% TLC)	3rd	173	3rd ppFEF 25/75 (%)
904	ppTLC (%)	Diffusion Impaired (≤80% DLCO)	Severe Restriction (≤50% TLC)	1st	49	1st ppTLC (%)
904	ppDLCO (%)	Diffusion Impaired (≤80% DLCO)	Severe Restriction (≤50% TLC)	1st	36	1st ppDLCO (%)
904	ppFVC (%)	Diffusion Impaired (≤80% DLCO)	Severe Restriction (≤50% TLC)	1st	75	1st ppFVC (%)
904	ppRV (%)	Diffusion Impaired (≤80% DLCO)	Severe Restriction (≤50% TLC)	1st	6	1st ppRV (%)
904	ppFEV1 (%)	Diffusion Impaired (≤80% DLCO)	Severe Restriction (≤50% TLC)	1st	65	1st ppFEV1 (%)
904	ppFEF 25/75 (%)	Diffusion Impaired (≤80% DLCO)	Severe Restriction (≤50% TLC)	1st	36	1st ppFEF 25/75 (%)
904	ppTLC (%)	Diffusion Impaired (≤80% DLCO)	Severe Restriction (≤50% TLC)	2nd	80	2nd ppTLC (%)
904	ppDLCO (%)	Diffusion Impaired (≤80% DLCO)	Severe Restriction (≤50% TLC)	2nd	54	2nd ppDLCO (%)
904	ppFVC (%)	Diffusion Impaired (≤80% DLCO)	Severe Restriction (≤50% TLC)	2nd	97	2nd ppFVC (%)
904	ppRV (%)	Diffusion Impaired (≤80% DLCO)	Severe Restriction (≤50% TLC)	2nd	39	2nd ppRV (%)
904	ppFEV1 (%)	Diffusion Impaired (≤80% DLCO)	Severe Restriction (≤50% TLC)	2nd	58	2nd ppFEV1 (%)
904	ppFEF 25/75 (%)	Diffusion Impaired (≤80% DLCO)	Severe Restriction (≤50% TLC)	2nd	17	2nd ppFEF 25/75 (%)
904	ppTLC (%)	Diffusion Impaired (≤80% DLCO)	Severe Restriction (≤50% TLC)	3rd	91	3rd ppTLC (%)
904	ppDLCO (%)	Diffusion Impaired (≤80% DLCO)	Severe Restriction (≤50% TLC)	3rd	59	3rd ppDLCO (%)
904	ppFVC (%)	Diffusion Impaired (≤80% DLCO)	Severe Restriction (≤50% TLC)	3rd	90	3rd ppFVC (%)
904	ppRV (%)	Diffusion Impaired (≤80% DLCO)	Severe Restriction (≤50% TLC)	3rd	71	3rd ppRV (%)
904	ppFEV1 (%)	Diffusion Impaired (≤80% DLCO)	Severe Restriction (≤50% TLC)	3rd	76	3rd ppFEV1 (%)
904	ppFEF 25/75 (%)	Diffusion Impaired (≤80% DLCO)	Severe Restriction (≤50% TLC)	3rd	42	3rd ppFEF 25/75 (%)
95	ppTLC (%)	Diffusion Impaired (≤80% DLCO)	Moderate Restriction (51-70% TLC)	1st	55	1st ppTLC (%)
95	ppDLCO (%)	Diffusion Impaired (≤80% DLCO)	Moderate Restriction (51-70% TLC)	1st	62	1st ppDLCO (%)
95	ppFVC (%)	Diffusion Impaired (≤80% DLCO)	Moderate Restriction (51-70% TLC)	1st	74	1st ppFVC (%)
95	ppRV (%)	Diffusion Impaired (≤80% DLCO)	Moderate Restriction (51-70% TLC)	1st	13	1st ppRV (%)
95	ppFEV1 (%)	Diffusion Impaired (≤80% DLCO)	Moderate Restriction (51-70% TLC)	1st	74	1st ppFEV1 (%)
95	ppFEF 25/75 (%)	Diffusion Impaired (≤80% DLCO)	Moderate Restriction (51-70% TLC)	1st	81	1st ppFEF 25/75 (%)
95	ppTLC (%)	Diffusion Impaired (≤80% DLCO)	Moderate Restriction (51-70% TLC)	2nd	74	2nd ppTLC (%)
95	ppDLCO (%)	Diffusion Impaired (≤80% DLCO)	Moderate Restriction (51-70% TLC)	2nd	67	2nd ppDLCO (%)
95	ppFVC (%)	Diffusion Impaired (≤80% DLCO)	Moderate Restriction (51-70% TLC)	2nd	73	2nd ppFVC (%)
95	ppRV (%)	Diffusion Impaired (≤80% DLCO)	Moderate Restriction (51-70% TLC)	2nd	65	2nd ppRV (%)
95	ppFEV1 (%)	Diffusion Impaired (≤80% DLCO)	Moderate Restriction (51-70% TLC)	2nd	74	2nd ppFEV1 (%)
95	ppFEF 25/75 (%)	Diffusion Impaired (≤80% DLCO)	Moderate Restriction (51-70% TLC)	2nd	77	2nd ppFEF 25/75 (%)
48	ppTLC (%)	Diffusion Impaired (≤80% DLCO)	Moderate Restriction (51-70% TLC)	1st	60	1st ppTLC (%)
48	ppDLCO (%)	Diffusion Impaired (≤80% DLCO)	Moderate Restriction (51-70% TLC)	1st	58	1st ppDLCO (%)
48	ppFVC (%)	Diffusion Impaired (≤80% DLCO)	Moderate Restriction (51-70% TLC)	1st	83	1st ppFVC (%)
48	ppRV (%)	Diffusion Impaired (≤80% DLCO)	Moderate Restriction (51-70% TLC)	1st	48	1st ppRV (%)
48	ppFEV1 (%)	Diffusion Impaired (≤80% DLCO)	Moderate Restriction (51-70% TLC)	1st	98	1st ppFEV1 (%)
48	ppFEF 25/75 (%)	Diffusion Impaired (≤80% DLCO)	Moderate Restriction (51-70% TLC)	1st	183	1st ppFEF 25/75 (%)
69	ppTLC (%)	Diffusion Normal (>80% DLCO)	Mild Restriction (71-80% TLC)	1st	75	1st ppTLC (%)
69	ppDLCO (%)	Diffusion Normal (>80% DLCO)	Mild Restriction (71-80% TLC)	1st	92	1st ppDLCO (%)
69	ppFVC (%)	Diffusion Normal (>80% DLCO)	Mild Restriction (71-80% TLC)	1st	98	1st ppFVC (%)
69	ppRV (%)	Diffusion Normal (>80% DLCO)	Mild Restriction (71-80% TLC)	1st	16	1st ppRV (%)
69	ppFEV1 (%)	Diffusion Normal (>80% DLCO)	Mild Restriction (71-80% TLC)	1st	94	1st ppFEV1 (%)
69	ppFEF 25/75 (%)	Diffusion Normal (>80% DLCO)	Mild Restriction (71-80% TLC)	1st	94	1st ppFEF 25/75 (%)
69	ppTLC (%)	Diffusion Normal (>80% DLCO)	Mild Restriction (71-80% TLC)	2nd	81	2nd ppTLC (%)
69	ppDLCO (%)	Diffusion Normal (>80% DLCO)	Mild Restriction (71-80% TLC)	2nd	90	2nd ppDLCO (%)
69	ppFVC (%)	Diffusion Normal (>80% DLCO)	Mild Restriction (71-80% TLC)	2nd	98	2nd ppFVC (%)
69	ppRV (%)	Diffusion Normal (>80% DLCO)	Mild Restriction (71-80% TLC)	2nd	33	2nd ppRV (%)
69	ppFEV1 (%)	Diffusion Normal (>80% DLCO)	Mild Restriction (71-80% TLC)	2nd	99	2nd ppFEV1 (%)
69	ppFEF 25/75 (%)	Diffusion Normal (>80% DLCO)	Mild Restriction (71-80% TLC)	2nd	108	2nd ppFEF 25/75 (%)
925	ppTLC (%)	Diffusion Impaired (≤80% DLCO)	Severe Restriction (≤50% TLC)	1st	43	1st ppTLC (%)
925	ppDLCO (%)	Diffusion Impaired (≤80% DLCO)	Severe Restriction (≤50% TLC)	1st	37	1st ppDLCO (%)
925	ppFVC (%)	Diffusion Impaired (≤80% DLCO)	Severe Restriction (≤50% TLC)	1st	58	1st ppFVC (%)
925	ppRV (%)	Diffusion Impaired (≤80% DLCO)	Severe Restriction (≤50% TLC)	1st	27	1st ppRV (%)
925	ppFEV1 (%)	Diffusion Impaired (≤80% DLCO)	Severe Restriction (≤50% TLC)	1st	66	1st ppFEV1 (%)
925	ppFEF 25/75 (%)	Diffusion Impaired (≤80% DLCO)	Severe Restriction (≤50% TLC)	1st	144	1st ppFEF 25/75 (%)
925	ppTLC (%)	Diffusion Impaired (≤80% DLCO)	Severe Restriction (≤50% TLC)	2nd	49	2nd ppTLC (%)
925	ppDLCO (%)	Diffusion Impaired (≤80% DLCO)	Severe Restriction (≤50% TLC)	2nd	45	2nd ppDLCO (%)
925	ppFVC (%)	Diffusion Impaired (≤80% DLCO)	Severe Restriction (≤50% TLC)	2nd	57	2nd ppFVC (%)
925	ppRV (%)	Diffusion Impaired (≤80% DLCO)	Severe Restriction (≤50% TLC)	2nd	43	2nd ppRV (%)
925	ppFEV1 (%)	Diffusion Impaired (≤80% DLCO)	Severe Restriction (≤50% TLC)	2nd	71	2nd ppFEV1 (%)
925	ppFEF 25/75 (%)	Diffusion Impaired (≤80% DLCO)	Severe Restriction (≤50% TLC)	2nd	191	2nd ppFEF 25/75 (%)
925	ppTLC (%)	Diffusion Impaired (≤80% DLCO)	Severe Restriction (≤50% TLC)	3rd	52	3rd ppTLC (%)
925	ppDLCO (%)	Diffusion Impaired (≤80% DLCO)	Severe Restriction (≤50% TLC)	3rd	49	3rd ppDLCO (%)
925	ppFVC (%)	Diffusion Impaired (≤80% DLCO)	Severe Restriction (≤50% TLC)	3rd	72	3rd ppFVC (%)
925	ppRV (%)	Diffusion Impaired (≤80% DLCO)	Severe Restriction (≤50% TLC)	3rd	30	3rd ppRV (%)
925	ppFEV1 (%)	Diffusion Impaired (≤80% DLCO)	Severe Restriction (≤50% TLC)	3rd	83	3rd ppFEV1 (%)
925	ppFEF 25/75 (%)	Diffusion Impaired (≤80% DLCO)	Severe Restriction (≤50% TLC)	3rd	142	3rd ppFEF 25/75 (%)
71	ppTLC (%)	Diffusion Normal (>80% DLCO)	No Restriction (>80% TLC)	1st	98	1st ppTLC (%)
71	ppDLCO (%)	Diffusion Normal (>80% DLCO)	No Restriction (>80% TLC)	1st	150	1st ppDLCO (%)
71	ppFVC (%)	Diffusion Normal (>80% DLCO)	No Restriction (>80% TLC)	1st	98	1st ppFVC (%)
71	ppRV (%)	Diffusion Normal (>80% DLCO)	No Restriction (>80% TLC)	1st	82	1st ppRV (%)
71	ppFEV1 (%)	Diffusion Normal (>80% DLCO)	No Restriction (>80% TLC)	1st	94	1st ppFEV1 (%)
71	ppFEF 25/75 (%)	Diffusion Normal (>80% DLCO)	No Restriction (>80% TLC)	1st	88	1st ppFEF 25/75 (%)
863	ppTLC (%)	Diffusion Normal (>80% DLCO)	No Restriction (>80% TLC)	1st	92	1st ppTLC (%)
863	ppDLCO (%)	Diffusion Normal (>80% DLCO)	No Restriction (>80% TLC)	1st	88	1st ppDLCO (%)
863	ppFVC (%)	Diffusion Normal (>80% DLCO)	No Restriction (>80% TLC)	1st	102	1st ppFVC (%)
863	ppRV (%)	Diffusion Normal (>80% DLCO)	No Restriction (>80% TLC)	1st	55	1st ppRV (%)
863	ppFEV1 (%)	Diffusion Normal (>80% DLCO)	No Restriction (>80% TLC)	1st	102	1st ppFEV1 (%)
863	ppFEF 25/75 (%)	Diffusion Normal (>80% DLCO)	No Restriction (>80% TLC)	1st	103	1st ppFEF 25/75 (%)
96	ppTLC (%)	Diffusion Impaired (≤80% DLCO)	Severe Restriction (≤50% TLC)	1st	43	1st ppTLC (%)
96	ppDLCO (%)	Diffusion Impaired (≤80% DLCO)	Severe Restriction (≤50% TLC)	1st	64	1st ppDLCO (%)
96	ppFVC (%)	Diffusion Impaired (≤80% DLCO)	Severe Restriction (≤50% TLC)	1st	48	1st ppFVC (%)
96	ppRV (%)	Diffusion Impaired (≤80% DLCO)	Severe Restriction (≤50% TLC)	1st	34	1st ppRV (%)
96	ppFEV1 (%)	Diffusion Impaired (≤80% DLCO)	Severe Restriction (≤50% TLC)	1st	50	1st ppFEV1 (%)
96	ppFEF 25/75 (%)	Diffusion Impaired (≤80% DLCO)	Severe Restriction (≤50% TLC)	1st	59	1st ppFEF 25/75 (%)
43	ppTLC (%)	Diffusion Impaired (≤80% DLCO)	Moderate Restriction (51-70% TLC)	1st	69	1st ppTLC (%)
43	ppDLCO (%)	Diffusion Impaired (≤80% DLCO)	Moderate Restriction (51-70% TLC)	1st	53	1st ppDLCO (%)
43	ppFVC (%)	Diffusion Impaired (≤80% DLCO)	Moderate Restriction (51-70% TLC)	1st	61	1st ppFVC (%)
43	ppRV (%)	Diffusion Impaired (≤80% DLCO)	Moderate Restriction (51-70% TLC)	1st	66	1st ppRV (%)
43	ppFEV1 (%)	Diffusion Impaired (≤80% DLCO)	Moderate Restriction (51-70% TLC)	1st	54	1st ppFEV1 (%)
43	ppFEF 25/75 (%)	Diffusion Impaired (≤80% DLCO)	Moderate Restriction (51-70% TLC)	1st	41	1st ppFEF 25/75 (%)
43	ppTLC (%)	Diffusion Impaired (≤80% DLCO)	Moderate Restriction (51-70% TLC)	2nd	80	2nd ppTLC (%)
43	ppDLCO (%)	Diffusion Impaired (≤80% DLCO)	Moderate Restriction (51-70% TLC)	2nd	85	2nd ppDLCO (%)
43	ppFVC (%)	Diffusion Impaired (≤80% DLCO)	Moderate Restriction (51-70% TLC)	2nd	89	2nd ppFVC (%)
43	ppRV (%)	Diffusion Impaired (≤80% DLCO)	Moderate Restriction (51-70% TLC)	2nd	46	2nd ppRV (%)
43	ppFEV1 (%)	Diffusion Impaired (≤80% DLCO)	Moderate Restriction (51-70% TLC)	2nd	91	2nd ppFEV1 (%)
43	ppFEF 25/75 (%)	Diffusion Impaired (≤80% DLCO)	Moderate Restriction (51-70% TLC)	2nd	97	2nd ppFEF 25/75 (%)
43	ppTLC (%)	Diffusion Impaired (≤80% DLCO)	Moderate Restriction (51-70% TLC)	3rd	76	3rd ppTLC (%)
43	ppDLCO (%)	Diffusion Impaired (≤80% DLCO)	Moderate Restriction (51-70% TLC)	3rd	84	3rd ppDLCO (%)
43	ppFVC (%)	Diffusion Impaired (≤80% DLCO)	Moderate Restriction (51-70% TLC)	3rd	94	3rd ppFVC (%)
43	ppRV (%)	Diffusion Impaired (≤80% DLCO)	Moderate Restriction (51-70% TLC)	3rd	28	3rd ppRV (%)
43	ppFEV1 (%)	Diffusion Impaired (≤80% DLCO)	Moderate Restriction (51-70% TLC)	3rd	97	3rd ppFEV1 (%)
43	ppFEF 25/75 (%)	Diffusion Impaired (≤80% DLCO)	Moderate Restriction (51-70% TLC)	3rd	106	3rd ppFEF 25/75 (%)
928	ppTLC (%)	Diffusion Impaired (≤80% DLCO)	Moderate Restriction (51-70% TLC)	1st	66	1st ppTLC (%)
928	ppDLCO (%)	Diffusion Impaired (≤80% DLCO)	Moderate Restriction (51-70% TLC)	1st	71	1st ppDLCO (%)
928	ppFVC (%)	Diffusion Impaired (≤80% DLCO)	Moderate Restriction (51-70% TLC)	1st	95	1st ppFVC (%)
928	ppRV (%)	Diffusion Impaired (≤80% DLCO)	Moderate Restriction (51-70% TLC)	1st	32	1st ppRV (%)
928	ppFEV1 (%)	Diffusion Impaired (≤80% DLCO)	Moderate Restriction (51-70% TLC)	1st	102	1st ppFEV1 (%)
928	ppFEF 25/75 (%)	Diffusion Impaired (≤80% DLCO)	Moderate Restriction (51-70% TLC)	1st	136	1st ppFEF 25/75 (%)
818	ppTLC (%)	Diffusion Impaired (≤80% DLCO)	Severe Restriction (≤50% TLC)	1st	40	1st ppTLC (%)
818	ppDLCO (%)	Diffusion Impaired (≤80% DLCO)	Severe Restriction (≤50% TLC)	1st	36	1st ppDLCO (%)
818	ppFVC (%)	Diffusion Impaired (≤80% DLCO)	Severe Restriction (≤50% TLC)	1st	57	1st ppFVC (%)
818	ppRV (%)	Diffusion Impaired (≤80% DLCO)	Severe Restriction (≤50% TLC)	1st	22	1st ppRV (%)
818	ppFEV1 (%)	Diffusion Impaired (≤80% DLCO)	Severe Restriction (≤50% TLC)	1st	65	1st ppFEV1 (%)
818	ppFEF 25/75 (%)	Diffusion Impaired (≤80% DLCO)	Severe Restriction (≤50% TLC)	1st	134	1st ppFEF 25/75 (%)
818	ppDLCO (%)	Diffusion Impaired (≤80% DLCO)	Severe Restriction (≤50% TLC)	2nd	44	2nd ppDLCO (%)
818	ppFVC (%)	Diffusion Impaired (≤80% DLCO)	Severe Restriction (≤50% TLC)	2nd	65	2nd ppFVC (%)
818	ppFEV1 (%)	Diffusion Impaired (≤80% DLCO)	Severe Restriction (≤50% TLC)	2nd	74	2nd ppFEV1 (%)
818	ppFEF 25/75 (%)	Diffusion Impaired (≤80% DLCO)	Severe Restriction (≤50% TLC)	2nd	137	2nd ppFEF 25/75 (%)
818	ppDLCO (%)	Diffusion Impaired (≤80% DLCO)	Severe Restriction (≤50% TLC)	3rd	53	3rd ppDLCO (%)
818	ppFVC (%)	Diffusion Impaired (≤80% DLCO)	Severe Restriction (≤50% TLC)	3rd	67	3rd ppFVC (%)
818	ppFEV1 (%)	Diffusion Impaired (≤80% DLCO)	Severe Restriction (≤50% TLC)	3rd	75	3rd ppFEV1 (%)
818	ppFEF 25/75 (%)	Diffusion Impaired (≤80% DLCO)	Severe Restriction (≤50% TLC)	3rd	133	3rd ppFEF 25/75 (%)
50	ppTLC (%)	Diffusion Impaired (≤80% DLCO)	Mild Restriction (71-80% TLC)	1st	72	1st ppTLC (%)
50	ppDLCO (%)	Diffusion Impaired (≤80% DLCO)	Mild Restriction (71-80% TLC)	1st	56	1st ppDLCO (%)
50	ppFVC (%)	Diffusion Impaired (≤80% DLCO)	Mild Restriction (71-80% TLC)	1st	89	1st ppFVC (%)
50	ppRV (%)	Diffusion Impaired (≤80% DLCO)	Mild Restriction (71-80% TLC)	1st	53	1st ppRV (%)
50	ppFEV1 (%)	Diffusion Impaired (≤80% DLCO)	Mild Restriction (71-80% TLC)	1st	91	1st ppFEV1 (%)
50	ppFEF 25/75 (%)	Diffusion Impaired (≤80% DLCO)	Mild Restriction (71-80% TLC)	1st	94	1st ppFEF 25/75 (%)
50	ppTLC (%)	Diffusion Impaired (≤80% DLCO)	Mild Restriction (71-80% TLC)	2nd	76	2nd ppTLC (%)
50	ppDLCO (%)	Diffusion Impaired (≤80% DLCO)	Mild Restriction (71-80% TLC)	2nd	79	2nd ppDLCO (%)
50	ppFVC (%)	Diffusion Impaired (≤80% DLCO)	Mild Restriction (71-80% TLC)	2nd	83	2nd ppFVC (%)
50	ppRV (%)	Diffusion Impaired (≤80% DLCO)	Mild Restriction (71-80% TLC)	2nd	64	2nd ppRV (%)
50	ppFEV1 (%)	Diffusion Impaired (≤80% DLCO)	Mild Restriction (71-80% TLC)	2nd	89	2nd ppFEV1 (%)
50	ppFEF 25/75 (%)	Diffusion Impaired (≤80% DLCO)	Mild Restriction (71-80% TLC)	2nd	121	2nd ppFEF 25/75 (%)
24	ppTLC (%)	Diffusion Normal (>80% DLCO)	Mild Restriction (71-80% TLC)	1st	71	1st ppTLC (%)
24	ppDLCO (%)	Diffusion Normal (>80% DLCO)	Mild Restriction (71-80% TLC)	1st	104	1st ppDLCO (%)
24	ppFVC (%)	Diffusion Normal (>80% DLCO)	Mild Restriction (71-80% TLC)	1st	88	1st ppFVC (%)
24	ppRV (%)	Diffusion Normal (>80% DLCO)	Mild Restriction (71-80% TLC)	1st	49	1st ppRV (%)
24	ppFEV1 (%)	Diffusion Normal (>80% DLCO)	Mild Restriction (71-80% TLC)	1st	81	1st ppFEV1 (%)
24	ppFEF 25/75 (%)	Diffusion Normal (>80% DLCO)	Mild Restriction (71-80% TLC)	1st	55	1st ppFEF 25/75 (%)
861	ppTLC (%)	Diffusion Impaired (≤80% DLCO)	Severe Restriction (≤50% TLC)	1st	50	1st ppTLC (%)
861	ppDLCO (%)	Diffusion Impaired (≤80% DLCO)	Severe Restriction (≤50% TLC)	1st	57	1st ppDLCO (%)
861	ppFVC (%)	Diffusion Impaired (≤80% DLCO)	Severe Restriction (≤50% TLC)	1st	76	1st ppFVC (%)
861	ppRV (%)	Diffusion Impaired (≤80% DLCO)	Severe Restriction (≤50% TLC)	1st	19	1st ppRV (%)
861	ppFEV1 (%)	Diffusion Impaired (≤80% DLCO)	Severe Restriction (≤50% TLC)	1st	77	1st ppFEV1 (%)
861	ppFEF 25/75 (%)	Diffusion Impaired (≤80% DLCO)	Severe Restriction (≤50% TLC)	1st	81	1st ppFEF 25/75 (%)
861	ppTLC (%)	Diffusion Impaired (≤80% DLCO)	Severe Restriction (≤50% TLC)	2nd	57	2nd ppTLC (%)
861	ppDLCO (%)	Diffusion Impaired (≤80% DLCO)	Severe Restriction (≤50% TLC)	2nd	56	2nd ppDLCO (%)
861	ppFVC (%)	Diffusion Impaired (≤80% DLCO)	Severe Restriction (≤50% TLC)	2nd	82	2nd ppFVC (%)
861	ppRV (%)	Diffusion Impaired (≤80% DLCO)	Severe Restriction (≤50% TLC)	2nd	29	2nd ppRV (%)
861	ppFEV1 (%)	Diffusion Impaired (≤80% DLCO)	Severe Restriction (≤50% TLC)	2nd	81	2nd ppFEV1 (%)
861	ppFEF 25/75 (%)	Diffusion Impaired (≤80% DLCO)	Severe Restriction (≤50% TLC)	2nd	81	2nd ppFEF 25/75 (%)
824	ppTLC (%)	Diffusion Impaired (≤80% DLCO)	No Restriction (>80% TLC)	1st	84	1st ppTLC (%)
824	ppDLCO (%)	Diffusion Impaired (≤80% DLCO)	No Restriction (>80% TLC)	1st	72	1st ppDLCO (%)
824	ppFVC (%)	Diffusion Impaired (≤80% DLCO)	No Restriction (>80% TLC)	1st	89	1st ppFVC (%)
824	ppRV (%)	Diffusion Impaired (≤80% DLCO)	No Restriction (>80% TLC)	1st	63	1st ppRV (%)
824	ppFEV1 (%)	Diffusion Impaired (≤80% DLCO)	No Restriction (>80% TLC)	1st	92	1st ppFEV1 (%)
824	ppFEF 25/75 (%)	Diffusion Impaired (≤80% DLCO)	No Restriction (>80% TLC)	1st	101	1st ppFEF 25/75 (%)
824	ppTLC (%)	Diffusion Impaired (≤80% DLCO)	No Restriction (>80% TLC)	2nd	71	2nd ppTLC (%)
824	ppDLCO (%)	Diffusion Impaired (≤80% DLCO)	No Restriction (>80% TLC)	2nd	72	2nd ppDLCO (%)
824	ppFVC (%)	Diffusion Impaired (≤80% DLCO)	No Restriction (>80% TLC)	2nd	105	2nd ppFVC (%)
824	ppRV (%)	Diffusion Impaired (≤80% DLCO)	No Restriction (>80% TLC)	2nd	40	2nd ppRV (%)
824	ppFEV1 (%)	Diffusion Impaired (≤80% DLCO)	No Restriction (>80% TLC)	2nd	105	2nd ppFEV1 (%)
824	ppFEF 25/75 (%)	Diffusion Impaired (≤80% DLCO)	No Restriction (>80% TLC)	2nd	103	2nd ppFEF 25/75 (%)
105	ppTLC (%)	Diffusion Normal (>80% DLCO)	No Restriction (>80% TLC)	1st	81	1st ppTLC (%)
105	ppDLCO (%)	Diffusion Normal (>80% DLCO)	No Restriction (>80% TLC)	1st	116	1st ppDLCO (%)
105	ppFVC (%)	Diffusion Normal (>80% DLCO)	No Restriction (>80% TLC)	1st	82	1st ppFVC (%)
105	ppRV (%)	Diffusion Normal (>80% DLCO)	No Restriction (>80% TLC)	1st	69	1st ppRV (%)
105	ppFEV1 (%)	Diffusion Normal (>80% DLCO)	No Restriction (>80% TLC)	1st	74	1st ppFEV1 (%)
105	ppFEF 25/75 (%)	Diffusion Normal (>80% DLCO)	No Restriction (>80% TLC)	1st	56	1st ppFEF 25/75 (%)
105	ppTLC (%)	Diffusion Normal (>80% DLCO)	No Restriction (>80% TLC)	2nd	89	2nd ppTLC (%)
105	ppDLCO (%)	Diffusion Normal (>80% DLCO)	No Restriction (>80% TLC)	2nd	156	2nd ppDLCO (%)
105	ppFVC (%)	Diffusion Normal (>80% DLCO)	No Restriction (>80% TLC)	2nd	87	2nd ppFVC (%)
105	ppRV (%)	Diffusion Normal (>80% DLCO)	No Restriction (>80% TLC)	2nd	65	2nd ppRV (%)
105	ppFEV1 (%)	Diffusion Normal (>80% DLCO)	No Restriction (>80% TLC)	2nd	86	2nd ppFEV1 (%)
105	ppFEF 25/75 (%)	Diffusion Normal (>80% DLCO)	No Restriction (>80% TLC)	2nd	87	2nd ppFEF 25/75 (%)
854	ppTLC (%)	Diffusion Normal (>80% DLCO)	Moderate Restriction (51-70% TLC)	1st	65	1st ppTLC (%)
854	ppDLCO (%)	Diffusion Normal (>80% DLCO)	Moderate Restriction (51-70% TLC)	1st	87	1st ppDLCO (%)
854	ppFVC (%)	Diffusion Normal (>80% DLCO)	Moderate Restriction (51-70% TLC)	1st	98	1st ppFVC (%)
854	ppRV (%)	Diffusion Normal (>80% DLCO)	Moderate Restriction (51-70% TLC)	1st	31	1st ppRV (%)
854	ppFEV1 (%)	Diffusion Normal (>80% DLCO)	Moderate Restriction (51-70% TLC)	1st	105	1st ppFEV1 (%)
854	ppFEF 25/75 (%)	Diffusion Normal (>80% DLCO)	Moderate Restriction (51-70% TLC)	1st	88	1st ppFEF 25/75 (%)
854	ppTLC (%)	Diffusion Normal (>80% DLCO)	Moderate Restriction (51-70% TLC)	2nd	77	2nd ppTLC (%)
854	ppDLCO (%)	Diffusion Normal (>80% DLCO)	Moderate Restriction (51-70% TLC)	2nd	87	2nd ppDLCO (%)
854	ppFVC (%)	Diffusion Normal (>80% DLCO)	Moderate Restriction (51-70% TLC)	2nd	89	2nd ppFVC (%)
854	ppRV (%)	Diffusion Normal (>80% DLCO)	Moderate Restriction (51-70% TLC)	2nd	42	2nd ppRV (%)
854	ppFEV1 (%)	Diffusion Normal (>80% DLCO)	Moderate Restriction (51-70% TLC)	2nd	100	2nd ppFEV1 (%)
854	ppFEF 25/75 (%)	Diffusion Normal (>80% DLCO)	Moderate Restriction (51-70% TLC)	2nd	122	2nd ppFEF 25/75 (%)
87	ppTLC (%)	Diffusion Normal (>80% DLCO)	Mild Restriction (71-80% TLC)	1st	80	1st ppTLC (%)
87	ppDLCO (%)	Diffusion Normal (>80% DLCO)	Mild Restriction (71-80% TLC)	1st	97	1st ppDLCO (%)
87	ppFVC (%)	Diffusion Normal (>80% DLCO)	Mild Restriction (71-80% TLC)	1st	101	1st ppFVC (%)
87	ppRV (%)	Diffusion Normal (>80% DLCO)	Mild Restriction (71-80% TLC)	1st	30	1st ppRV (%)
87	ppFEV1 (%)	Diffusion Normal (>80% DLCO)	Mild Restriction (71-80% TLC)	1st	106	1st ppFEV1 (%)
87	ppFEF 25/75 (%)	Diffusion Normal (>80% DLCO)	Mild Restriction (71-80% TLC)	1st	131	1st ppFEF 25/75 (%)
111	ppTLC (%)	Diffusion Impaired (≤80% DLCO)	Mild Restriction (71-80% TLC)	1st	74	1st ppTLC (%)
111	ppDLCO (%)	Diffusion Impaired (≤80% DLCO)	Mild Restriction (71-80% TLC)	1st	75	1st ppDLCO (%)
111	ppFVC (%)	Diffusion Impaired (≤80% DLCO)	Mild Restriction (71-80% TLC)	1st	82	1st ppFVC (%)
111	ppRV (%)	Diffusion Impaired (≤80% DLCO)	Mild Restriction (71-80% TLC)	1st	48	1st ppRV (%)
111	ppFEV1 (%)	Diffusion Impaired (≤80% DLCO)	Mild Restriction (71-80% TLC)	1st	85	1st ppFEV1 (%)
111	ppFEF 25/75 (%)	Diffusion Impaired (≤80% DLCO)	Mild Restriction (71-80% TLC)	1st	104	1st ppFEF 25/75 (%)
13	ppTLC (%)	Diffusion Normal (>80% DLCO)	No Restriction (>80% TLC)	1st	88	1st ppTLC (%)
13	ppDLCO (%)	Diffusion Normal (>80% DLCO)	No Restriction (>80% TLC)	1st	97	1st ppDLCO (%)
13	ppFVC (%)	Diffusion Normal (>80% DLCO)	No Restriction (>80% TLC)	1st	109	1st ppFVC (%)
13	ppRV (%)	Diffusion Normal (>80% DLCO)	No Restriction (>80% TLC)	1st	31	1st ppRV (%)
13	ppFEV1 (%)	Diffusion Normal (>80% DLCO)	No Restriction (>80% TLC)	1st	109	1st ppFEV1 (%)
13	ppFEF 25/75 (%)	Diffusion Normal (>80% DLCO)	No Restriction (>80% TLC)	1st	102	1st ppFEF 25/75 (%)
44	ppTLC (%)	Diffusion Normal (>80% DLCO)	Mild Restriction (71-80% TLC)	1st	78	1st ppTLC (%)
44	ppDLCO (%)	Diffusion Normal (>80% DLCO)	Mild Restriction (71-80% TLC)	1st	100	1st ppDLCO (%)
44	ppFVC (%)	Diffusion Normal (>80% DLCO)	Mild Restriction (71-80% TLC)	1st	85	1st ppFVC (%)
44	ppRV (%)	Diffusion Normal (>80% DLCO)	Mild Restriction (71-80% TLC)	1st	69	1st ppRV (%)
44	ppFEV1 (%)	Diffusion Normal (>80% DLCO)	Mild Restriction (71-80% TLC)	1st	90	1st ppFEV1 (%)
44	ppFEF 25/75 (%)	Diffusion Normal (>80% DLCO)	Mild Restriction (71-80% TLC)	1st	123	1st ppFEF 25/75 (%)
842	ppTLC (%)	Diffusion Impaired (≤80% DLCO)	Moderate Restriction (51-70% TLC)	1st	70	1st ppTLC (%)
842	ppDLCO (%)	Diffusion Impaired (≤80% DLCO)	Moderate Restriction (51-70% TLC)	1st	80	1st ppDLCO (%)
842	ppFVC (%)	Diffusion Impaired (≤80% DLCO)	Moderate Restriction (51-70% TLC)	1st	93	1st ppFVC (%)
842	ppRV (%)	Diffusion Impaired (≤80% DLCO)	Moderate Restriction (51-70% TLC)	1st	45	1st ppRV (%)
842	ppFEV1 (%)	Diffusion Impaired (≤80% DLCO)	Moderate Restriction (51-70% TLC)	1st	99	1st ppFEV1 (%)
842	ppFEF 25/75 (%)	Diffusion Impaired (≤80% DLCO)	Moderate Restriction (51-70% TLC)	1st	119	1st ppFEF 25/75 (%)
924	ppTLC (%)	Diffusion Normal (>80% DLCO)	No Restriction (>80% TLC)	1st	82	1st ppTLC (%)
924	ppDLCO (%)	Diffusion Normal (>80% DLCO)	No Restriction (>80% TLC)	1st	101	1st ppDLCO (%)
924	ppFVC (%)	Diffusion Normal (>80% DLCO)	No Restriction (>80% TLC)	1st	88	1st ppFVC (%)
924	ppRV (%)	Diffusion Normal (>80% DLCO)	No Restriction (>80% TLC)	1st	63	1st ppRV (%)
924	ppFEV1 (%)	Diffusion Normal (>80% DLCO)	No Restriction (>80% TLC)	1st	88	1st ppFEV1 (%)
924	ppFEF 25/75 (%)	Diffusion Normal (>80% DLCO)	No Restriction (>80% TLC)	1st	86	1st ppFEF 25/75 (%)
885	ppTLC (%)	Diffusion Impaired (≤80% DLCO)	No Restriction (>80% TLC)	1st	84	1st ppTLC (%)
885	ppDLCO (%)	Diffusion Impaired (≤80% DLCO)	No Restriction (>80% TLC)	1st	79	1st ppDLCO (%)
885	ppFVC (%)	Diffusion Impaired (≤80% DLCO)	No Restriction (>80% TLC)	1st	95	1st ppFVC (%)
885	ppRV (%)	Diffusion Impaired (≤80% DLCO)	No Restriction (>80% TLC)	1st	58	1st ppRV (%)
885	ppFEV1 (%)	Diffusion Impaired (≤80% DLCO)	No Restriction (>80% TLC)	1st	99	1st ppFEV1 (%)
885	ppFEF 25/75 (%)	Diffusion Impaired (≤80% DLCO)	No Restriction (>80% TLC)	1st	114	1st ppFEF 25/75 (%)
108	ppTLC (%)	Diffusion Impaired (≤80% DLCO)	Moderate Restriction (51-70% TLC)	1st	52	1st ppTLC (%)
108	ppDLCO (%)	Diffusion Impaired (≤80% DLCO)	Moderate Restriction (51-70% TLC)	1st	55	1st ppDLCO (%)
108	ppFVC (%)	Diffusion Impaired (≤80% DLCO)	Moderate Restriction (51-70% TLC)	1st	68	1st ppFVC (%)
108	ppRV (%)	Diffusion Impaired (≤80% DLCO)	Moderate Restriction (51-70% TLC)	1st	33	1st ppRV (%)
108	ppFEV1 (%)	Diffusion Impaired (≤80% DLCO)	Moderate Restriction (51-70% TLC)	1st	72	1st ppFEV1 (%)
108	ppFEF 25/75 (%)	Diffusion Impaired (≤80% DLCO)	Moderate Restriction (51-70% TLC)	1st	105	1st ppFEF 25/75 (%)
872	ppTLC (%)	Diffusion Normal (>80% DLCO)	No Restriction (>80% TLC)	1st	88	1st ppTLC (%)
872	ppDLCO (%)	Diffusion Normal (>80% DLCO)	No Restriction (>80% TLC)	1st	104	1st ppDLCO (%)
872	ppFVC (%)	Diffusion Normal (>80% DLCO)	No Restriction (>80% TLC)	1st	125	1st ppFVC (%)
872	ppRV (%)	Diffusion Normal (>80% DLCO)	No Restriction (>80% TLC)	1st	52	1st ppRV (%)
872	ppFEV1 (%)	Diffusion Normal (>80% DLCO)	No Restriction (>80% TLC)	1st	128	1st ppFEV1 (%)
872	ppFEF 25/75 (%)	Diffusion Normal (>80% DLCO)	No Restriction (>80% TLC)	1st	154	1st ppFEF 25/75 (%)
872	ppTLC (%)	Diffusion Normal (>80% DLCO)	No Restriction (>80% TLC)	2nd	99	2nd ppTLC (%)
872	ppDLCO (%)	Diffusion Normal (>80% DLCO)	No Restriction (>80% TLC)	2nd	115	2nd ppDLCO (%)
872	ppFVC (%)	Diffusion Normal (>80% DLCO)	No Restriction (>80% TLC)	2nd	136	2nd ppFVC (%)
872	ppRV (%)	Diffusion Normal (>80% DLCO)	No Restriction (>80% TLC)	2nd	62	2nd ppRV (%)
872	ppFEV1 (%)	Diffusion Normal (>80% DLCO)	No Restriction (>80% TLC)	2nd	152	2nd ppFEV1 (%)
872	ppFEF 25/75 (%)	Diffusion Normal (>80% DLCO)	No Restriction (>80% TLC)	2nd	210	2nd ppFEF 25/75 (%)
810	ppTLC (%)	Diffusion Impaired (≤80% DLCO)	Moderate Restriction (51-70% TLC)	1st	64	1st ppTLC (%)
810	ppDLCO (%)	Diffusion Impaired (≤80% DLCO)	Moderate Restriction (51-70% TLC)	1st	74	1st ppDLCO (%)
810	ppFVC (%)	Diffusion Impaired (≤80% DLCO)	Moderate Restriction (51-70% TLC)	1st	85	1st ppFVC (%)
810	ppRV (%)	Diffusion Impaired (≤80% DLCO)	Moderate Restriction (51-70% TLC)	1st	48	1st ppRV (%)
810	ppFEV1 (%)	Diffusion Impaired (≤80% DLCO)	Moderate Restriction (51-70% TLC)	1st	83	1st ppFEV1 (%)
810	ppFEF 25/75 (%)	Diffusion Impaired (≤80% DLCO)	Moderate Restriction (51-70% TLC)	1st	74	1st ppFEF 25/75 (%)
93	ppTLC (%)	Diffusion Impaired (≤80% DLCO)	Moderate Restriction (51-70% TLC)	1st	64	1st ppTLC (%)
93	ppDLCO (%)	Diffusion Impaired (≤80% DLCO)	Moderate Restriction (51-70% TLC)	1st	66	1st ppDLCO (%)
93	ppFVC (%)	Diffusion Impaired (≤80% DLCO)	Moderate Restriction (51-70% TLC)	1st	77	1st ppFVC (%)
93	ppRV (%)	Diffusion Impaired (≤80% DLCO)	Moderate Restriction (51-70% TLC)	1st	34	1st ppRV (%)
93	ppFEV1 (%)	Diffusion Impaired (≤80% DLCO)	Moderate Restriction (51-70% TLC)	1st	77	1st ppFEV1 (%)
93	ppFEF 25/75 (%)	Diffusion Impaired (≤80% DLCO)	Moderate Restriction (51-70% TLC)	1st	80	1st ppFEF 25/75 (%)
51	ppTLC (%)	Diffusion Normal (>80% DLCO)	Mild Restriction (71-80% TLC)	1st	72	1st ppTLC (%)
51	ppDLCO (%)	Diffusion Normal (>80% DLCO)	Mild Restriction (71-80% TLC)	1st	89	1st ppDLCO (%)
51	ppFVC (%)	Diffusion Normal (>80% DLCO)	Mild Restriction (71-80% TLC)	1st	98	1st ppFVC (%)
51	ppRV (%)	Diffusion Normal (>80% DLCO)	Mild Restriction (71-80% TLC)	1st	30	1st ppRV (%)
51	ppFEV1 (%)	Diffusion Normal (>80% DLCO)	Mild Restriction (71-80% TLC)	1st	101	1st ppFEV1 (%)
51	ppFEF 25/75 (%)	Diffusion Normal (>80% DLCO)	Mild Restriction (71-80% TLC)	1st	124	1st ppFEF 25/75 (%)
51	ppTLC (%)	Diffusion Normal (>80% DLCO)	Mild Restriction (71-80% TLC)	2nd	71	2nd ppTLC (%)
51	ppDLCO (%)	Diffusion Normal (>80% DLCO)	Mild Restriction (71-80% TLC)	2nd	91	2nd ppDLCO (%)
51	ppFVC (%)	Diffusion Normal (>80% DLCO)	Mild Restriction (71-80% TLC)	2nd	106	2nd ppFVC (%)
51	ppRV (%)	Diffusion Normal (>80% DLCO)	Mild Restriction (71-80% TLC)	2nd	8	2nd ppRV (%)
51	ppFEV1 (%)	Diffusion Normal (>80% DLCO)	Mild Restriction (71-80% TLC)	2nd	109	2nd ppFEV1 (%)
51	ppFEF 25/75 (%)	Diffusion Normal (>80% DLCO)	Mild Restriction (71-80% TLC)	2nd	118	2nd ppFEF 25/75 (%)
32	ppTLC (%)	Diffusion Impaired (≤80% DLCO)	Moderate Restriction (51-70% TLC)	1st	64	1st ppTLC (%)
32	ppDLCO (%)	Diffusion Impaired (≤80% DLCO)	Moderate Restriction (51-70% TLC)	1st	74	1st ppDLCO (%)
32	ppFVC (%)	Diffusion Impaired (≤80% DLCO)	Moderate Restriction (51-70% TLC)	1st	84	1st ppFVC (%)
32	ppRV (%)	Diffusion Impaired (≤80% DLCO)	Moderate Restriction (51-70% TLC)	1st	43	1st ppRV (%)
32	ppFEV1 (%)	Diffusion Impaired (≤80% DLCO)	Moderate Restriction (51-70% TLC)	1st	81	1st ppFEV1 (%)
32	ppFEF 25/75 (%)	Diffusion Impaired (≤80% DLCO)	Moderate Restriction (51-70% TLC)	1st	64	1st ppFEF 25/75 (%)
32	ppTLC (%)	Diffusion Impaired (≤80% DLCO)	Moderate Restriction (51-70% TLC)	2nd	77	2nd ppTLC (%)
32	ppDLCO (%)	Diffusion Impaired (≤80% DLCO)	Moderate Restriction (51-70% TLC)	2nd	90	2nd ppDLCO (%)
32	ppFVC (%)	Diffusion Impaired (≤80% DLCO)	Moderate Restriction (51-70% TLC)	2nd	83	2nd ppFVC (%)
32	ppRV (%)	Diffusion Impaired (≤80% DLCO)	Moderate Restriction (51-70% TLC)	2nd	75	2nd ppRV (%)
32	ppFEV1 (%)	Diffusion Impaired (≤80% DLCO)	Moderate Restriction (51-70% TLC)	2nd	80	2nd ppFEV1 (%)
32	ppFEF 25/75 (%)	Diffusion Impaired (≤80% DLCO)	Moderate Restriction (51-70% TLC)	2nd	68	2nd ppFEF 25/75 (%)
911	ppTLC (%)	Diffusion Normal (>80% DLCO)	No Restriction (>80% TLC)	1st	89	1st ppTLC (%)
911	ppDLCO (%)	Diffusion Normal (>80% DLCO)	No Restriction (>80% TLC)	1st	115	1st ppDLCO (%)
911	ppFVC (%)	Diffusion Normal (>80% DLCO)	No Restriction (>80% TLC)	1st	109	1st ppFVC (%)
911	ppRV (%)	Diffusion Normal (>80% DLCO)	No Restriction (>80% TLC)	1st	33	1st ppRV (%)
911	ppFEV1 (%)	Diffusion Normal (>80% DLCO)	No Restriction (>80% TLC)	1st	118	1st ppFEV1 (%)
911	ppFEF 25/75 (%)	Diffusion Normal (>80% DLCO)	No Restriction (>80% TLC)	1st	160	1st ppFEF 25/75 (%)
902	ppTLC (%)	Diffusion Impaired (≤80% DLCO)	Mild Restriction (71-80% TLC)	1st	80	1st ppTLC (%)
902	ppDLCO (%)	Diffusion Impaired (≤80% DLCO)	Mild Restriction (71-80% TLC)	1st	71	1st ppDLCO (%)
902	ppFVC (%)	Diffusion Impaired (≤80% DLCO)	Mild Restriction (71-80% TLC)	1st	79	1st ppFVC (%)
902	ppRV (%)	Diffusion Impaired (≤80% DLCO)	Mild Restriction (71-80% TLC)	1st	108	1st ppRV (%)
902	ppFEV1 (%)	Diffusion Impaired (≤80% DLCO)	Mild Restriction (71-80% TLC)	1st	75	1st ppFEV1 (%)
902	ppFEF 25/75 (%)	Diffusion Impaired (≤80% DLCO)	Mild Restriction (71-80% TLC)	1st	65	1st ppFEF 25/75 (%)
901	ppTLC (%)	Diffusion Impaired (≤80% DLCO)	Severe Restriction (≤50% TLC)	1st	49	1st ppTLC (%)
901	ppDLCO (%)	Diffusion Impaired (≤80% DLCO)	Severe Restriction (≤50% TLC)	1st	32	1st ppDLCO (%)
901	ppFVC (%)	Diffusion Impaired (≤80% DLCO)	Severe Restriction (≤50% TLC)	1st	55	1st ppFVC (%)
901	ppRV (%)	Diffusion Impaired (≤80% DLCO)	Severe Restriction (≤50% TLC)	1st	48	1st ppRV (%)
901	ppFEV1 (%)	Diffusion Impaired (≤80% DLCO)	Severe Restriction (≤50% TLC)	1st	62	1st ppFEV1 (%)
901	ppFEF 25/75 (%)	Diffusion Impaired (≤80% DLCO)	Severe Restriction (≤50% TLC)	1st	111	1st ppFEF 25/75 (%)
127	ppTLC (%)	Diffusion Normal (>80% DLCO)	Mild Restriction (71-80% TLC)	1st	73	1st ppTLC (%)
127	ppDLCO (%)	Diffusion Normal (>80% DLCO)	Mild Restriction (71-80% TLC)	1st	81	1st ppDLCO (%)
127	ppFVC (%)	Diffusion Normal (>80% DLCO)	Mild Restriction (71-80% TLC)	1st	95	1st ppFVC (%)
127	ppRV (%)	Diffusion Normal (>80% DLCO)	Mild Restriction (71-80% TLC)	1st	11	1st ppRV (%)
127	ppFEV1 (%)	Diffusion Normal (>80% DLCO)	Mild Restriction (71-80% TLC)	1st	90	1st ppFEV1 (%)
127	ppFEF 25/75 (%)	Diffusion Normal (>80% DLCO)	Mild Restriction (71-80% TLC)	1st	70	1st ppFEF 25/75 (%)
817	ppTLC (%)	Diffusion Impaired (≤80% DLCO)	Mild Restriction (71-80% TLC)	1st	72	1st ppTLC (%)
817	ppDLCO (%)	Diffusion Impaired (≤80% DLCO)	Mild Restriction (71-80% TLC)	1st	59	1st ppDLCO (%)
817	ppFVC (%)	Diffusion Impaired (≤80% DLCO)	Mild Restriction (71-80% TLC)	1st	98	1st ppFVC (%)
817	ppRV (%)	Diffusion Impaired (≤80% DLCO)	Mild Restriction (71-80% TLC)	1st	60	1st ppRV (%)
817	ppFEV1 (%)	Diffusion Impaired (≤80% DLCO)	Mild Restriction (71-80% TLC)	1st	95	1st ppFEV1 (%)
817	ppFEF 25/75 (%)	Diffusion Impaired (≤80% DLCO)	Mild Restriction (71-80% TLC)	1st	78	1st ppFEF 25/75 (%)
49	ppTLC (%)	Diffusion Impaired (≤80% DLCO)	Severe Restriction (≤50% TLC)	1st	47	1st ppTLC (%)
49	ppDLCO (%)	Diffusion Impaired (≤80% DLCO)	Severe Restriction (≤50% TLC)	1st	25	1st ppDLCO (%)
49	ppFVC (%)	Diffusion Impaired (≤80% DLCO)	Severe Restriction (≤50% TLC)	1st	33	1st ppFVC (%)
49	ppRV (%)	Diffusion Impaired (≤80% DLCO)	Severe Restriction (≤50% TLC)	1st	79	1st ppRV (%)
49	ppFEV1 (%)	Diffusion Impaired (≤80% DLCO)	Severe Restriction (≤50% TLC)	1st	40	1st ppFEV1 (%)
49	ppFEF 25/75 (%)	Diffusion Impaired (≤80% DLCO)	Severe Restriction (≤50% TLC)	1st	164	1st ppFEF 25/75 (%)
820	ppTLC (%)	Diffusion Impaired (≤80% DLCO)	Severe Restriction (≤50% TLC)	1st	45	1st ppTLC (%)
820	ppDLCO (%)	Diffusion Impaired (≤80% DLCO)	Severe Restriction (≤50% TLC)	1st	63	1st ppDLCO (%)
820	ppFVC (%)	Diffusion Impaired (≤80% DLCO)	Severe Restriction (≤50% TLC)	1st	48	1st ppFVC (%)
820	ppRV (%)	Diffusion Impaired (≤80% DLCO)	Severe Restriction (≤50% TLC)	1st	50	1st ppRV (%)
820	ppFEV1 (%)	Diffusion Impaired (≤80% DLCO)	Severe Restriction (≤50% TLC)	1st	47	1st ppFEV1 (%)
820	ppFEF 25/75 (%)	Diffusion Impaired (≤80% DLCO)	Severe Restriction (≤50% TLC)	1st	43	1st ppFEF 25/75 (%)
820	ppTLC (%)	Diffusion Impaired (≤80% DLCO)	Severe Restriction (≤50% TLC)	2nd	69	2nd ppTLC (%)
820	ppDLCO (%)	Diffusion Impaired (≤80% DLCO)	Severe Restriction (≤50% TLC)	2nd	61	2nd ppDLCO (%)
820	ppFVC (%)	Diffusion Impaired (≤80% DLCO)	Severe Restriction (≤50% TLC)	2nd	65	2nd ppFVC (%)
820	ppRV (%)	Diffusion Impaired (≤80% DLCO)	Severe Restriction (≤50% TLC)	2nd	67	2nd ppRV (%)
820	ppFEV1 (%)	Diffusion Impaired (≤80% DLCO)	Severe Restriction (≤50% TLC)	2nd	64	2nd ppFEV1 (%)
820	ppFEF 25/75 (%)	Diffusion Impaired (≤80% DLCO)	Severe Restriction (≤50% TLC)	2nd	64	2nd ppFEF 25/75 (%)
917	ppTLC (%)	Diffusion Impaired (≤80% DLCO)	Severe Restriction (≤50% TLC)	1st	47	1st ppTLC (%)
917	ppDLCO (%)	Diffusion Impaired (≤80% DLCO)	Severe Restriction (≤50% TLC)	1st	54	1st ppDLCO (%)
917	ppFVC (%)	Diffusion Impaired (≤80% DLCO)	Severe Restriction (≤50% TLC)	1st	84	1st ppFVC (%)
917	ppRV (%)	Diffusion Impaired (≤80% DLCO)	Severe Restriction (≤50% TLC)	1st	0	1st ppRV (%)
917	ppFEV1 (%)	Diffusion Impaired (≤80% DLCO)	Severe Restriction (≤50% TLC)	1st	89	1st ppFEV1 (%)
917	ppFEF 25/75 (%)	Diffusion Impaired (≤80% DLCO)	Severe Restriction (≤50% TLC)	1st	107	1st ppFEF 25/75 (%)
90	ppTLC (%)	Diffusion Normal (>80% DLCO)	Mild Restriction (71-80% TLC)	1st	71	1st ppTLC (%)
90	ppDLCO (%)	Diffusion Normal (>80% DLCO)	Mild Restriction (71-80% TLC)	1st	89	1st ppDLCO (%)
90	ppFVC (%)	Diffusion Normal (>80% DLCO)	Mild Restriction (71-80% TLC)	1st	107	1st ppFVC (%)
90	ppFEV1 (%)	Diffusion Normal (>80% DLCO)	Mild Restriction (71-80% TLC)	1st	102	1st ppFEV1 (%)
90	ppFEF 25/75 (%)	Diffusion Normal (>80% DLCO)	Mild Restriction (71-80% TLC)	1st	101	1st ppFEF 25/75 (%)
860	ppTLC (%)	Diffusion Impaired (≤80% DLCO)	Severe Restriction (≤50% TLC)	1st	41	1st ppTLC (%)
860	ppDLCO (%)	Diffusion Impaired (≤80% DLCO)	Severe Restriction (≤50% TLC)	1st	41	1st ppDLCO (%)
860	ppFVC (%)	Diffusion Impaired (≤80% DLCO)	Severe Restriction (≤50% TLC)	1st	58	1st ppFVC (%)
860	ppRV (%)	Diffusion Impaired (≤80% DLCO)	Severe Restriction (≤50% TLC)	1st	31	1st ppRV (%)
860	ppFEV1 (%)	Diffusion Impaired (≤80% DLCO)	Severe Restriction (≤50% TLC)	1st	72	1st ppFEV1 (%)
860	ppFEF 25/75 (%)	Diffusion Impaired (≤80% DLCO)	Severe Restriction (≤50% TLC)	1st	224	1st ppFEF 25/75 (%)
860	ppTLC (%)	Diffusion Impaired (≤80% DLCO)	Severe Restriction (≤50% TLC)	2nd	59	2nd ppTLC (%)
860	ppDLCO (%)	Diffusion Impaired (≤80% DLCO)	Severe Restriction (≤50% TLC)	2nd	44	2nd ppDLCO (%)
860	ppFVC (%)	Diffusion Impaired (≤80% DLCO)	Severe Restriction (≤50% TLC)	2nd	94	2nd ppFVC (%)
860	ppRV (%)	Diffusion Impaired (≤80% DLCO)	Severe Restriction (≤50% TLC)	2nd	41	2nd ppRV (%)
860	ppFEV1 (%)	Diffusion Impaired (≤80% DLCO)	Severe Restriction (≤50% TLC)	2nd	103	2nd ppFEV1 (%)
860	ppFEF 25/75 (%)	Diffusion Impaired (≤80% DLCO)	Severe Restriction (≤50% TLC)	2nd	172	2nd ppFEF 25/75 (%)
12	ppTLC (%)	Diffusion Normal (>80% DLCO)	Moderate Restriction (51-70% TLC)	1st	65	1st ppTLC (%)
12	ppDLCO (%)	Diffusion Normal (>80% DLCO)	Moderate Restriction (51-70% TLC)	1st	85	1st ppDLCO (%)
12	ppFVC (%)	Diffusion Normal (>80% DLCO)	Moderate Restriction (51-70% TLC)	1st	86	1st ppFVC (%)
12	ppRV (%)	Diffusion Normal (>80% DLCO)	Moderate Restriction (51-70% TLC)	1st	48	1st ppRV (%)
12	ppFEV1 (%)	Diffusion Normal (>80% DLCO)	Moderate Restriction (51-70% TLC)	1st	95	1st ppFEV1 (%)
12	ppFEF 25/75 (%)	Diffusion Normal (>80% DLCO)	Moderate Restriction (51-70% TLC)	1st	162	1st ppFEF 25/75 (%)
12	ppTLC (%)	Diffusion Normal (>80% DLCO)	Moderate Restriction (51-70% TLC)	2nd	62	2nd ppTLC (%)
12	ppDLCO (%)	Diffusion Normal (>80% DLCO)	Moderate Restriction (51-70% TLC)	2nd	75	2nd ppDLCO (%)
12	ppFVC (%)	Diffusion Normal (>80% DLCO)	Moderate Restriction (51-70% TLC)	2nd	76	2nd ppFVC (%)
12	ppRV (%)	Diffusion Normal (>80% DLCO)	Moderate Restriction (51-70% TLC)	2nd	53	2nd ppRV (%)
12	ppFEV1 (%)	Diffusion Normal (>80% DLCO)	Moderate Restriction (51-70% TLC)	2nd	90	2nd ppFEV1 (%)
12	ppFEF 25/75 (%)	Diffusion Normal (>80% DLCO)	Moderate Restriction (51-70% TLC)	2nd	149	2nd ppFEF 25/75 (%)
29	ppTLC (%)	Diffusion Impaired (≤80% DLCO)	Mild Restriction (71-80% TLC)	1st	72	1st ppTLC (%)
29	ppDLCO (%)	Diffusion Impaired (≤80% DLCO)	Mild Restriction (71-80% TLC)	1st	78	1st ppDLCO (%)
29	ppFVC (%)	Diffusion Impaired (≤80% DLCO)	Mild Restriction (71-80% TLC)	1st	83	1st ppFVC (%)
29	ppRV (%)	Diffusion Impaired (≤80% DLCO)	Mild Restriction (71-80% TLC)	1st	42	1st ppRV (%)
29	ppFEV1 (%)	Diffusion Impaired (≤80% DLCO)	Mild Restriction (71-80% TLC)	1st	92	1st ppFEV1 (%)
29	ppFEF 25/75 (%)	Diffusion Impaired (≤80% DLCO)	Mild Restriction (71-80% TLC)	1st	152	1st ppFEF 25/75 (%)
29	ppTLC (%)	Diffusion Impaired (≤80% DLCO)	Mild Restriction (71-80% TLC)	2nd	74	2nd ppTLC (%)
29	ppDLCO (%)	Diffusion Impaired (≤80% DLCO)	Mild Restriction (71-80% TLC)	2nd	79	2nd ppDLCO (%)
29	ppFVC (%)	Diffusion Impaired (≤80% DLCO)	Mild Restriction (71-80% TLC)	2nd	86	2nd ppFVC (%)
29	ppRV (%)	Diffusion Impaired (≤80% DLCO)	Mild Restriction (71-80% TLC)	2nd	44	2nd ppRV (%)
29	ppFEV1 (%)	Diffusion Impaired (≤80% DLCO)	Mild Restriction (71-80% TLC)	2nd	90	2nd ppFEV1 (%)
29	ppFEF 25/75 (%)	Diffusion Impaired (≤80% DLCO)	Mild Restriction (71-80% TLC)	2nd	131	2nd ppFEF 25/75 (%)
29	ppFVC (%)	Diffusion Impaired (≤80% DLCO)	Mild Restriction (71-80% TLC)	3rd	81	3rd ppFVC (%)
29	ppFEV1 (%)	Diffusion Impaired (≤80% DLCO)	Mild Restriction (71-80% TLC)	3rd	85	3rd ppFEV1 (%)
29	ppFEF 25/75 (%)	Diffusion Impaired (≤80% DLCO)	Mild Restriction (71-80% TLC)	3rd	105	3rd ppFEF 25/75 (%)
926	ppTLC (%)	Diffusion Impaired (≤80% DLCO)	Severe Restriction (≤50% TLC)	1st	50	1st ppTLC (%)
926	ppDLCO (%)	Diffusion Impaired (≤80% DLCO)	Severe Restriction (≤50% TLC)	1st	44	1st ppDLCO (%)
926	ppFVC (%)	Diffusion Impaired (≤80% DLCO)	Severe Restriction (≤50% TLC)	1st	74	1st ppFVC (%)
926	ppRV (%)	Diffusion Impaired (≤80% DLCO)	Severe Restriction (≤50% TLC)	1st	20	1st ppRV (%)
926	ppFEV1 (%)	Diffusion Impaired (≤80% DLCO)	Severe Restriction (≤50% TLC)	1st	85	1st ppFEV1 (%)
926	ppFEF 25/75 (%)	Diffusion Impaired (≤80% DLCO)	Severe Restriction (≤50% TLC)	1st	122	1st ppFEF 25/75 (%)
926	ppTLC (%)	Diffusion Impaired (≤80% DLCO)	Severe Restriction (≤50% TLC)	2nd	51	2nd ppTLC (%)
926	ppDLCO (%)	Diffusion Impaired (≤80% DLCO)	Severe Restriction (≤50% TLC)	2nd	49	2nd ppDLCO (%)
926	ppFVC (%)	Diffusion Impaired (≤80% DLCO)	Severe Restriction (≤50% TLC)	2nd	71	2nd ppFVC (%)
926	ppRV (%)	Diffusion Impaired (≤80% DLCO)	Severe Restriction (≤50% TLC)	2nd	29	2nd ppRV (%)
926	ppFEV1 (%)	Diffusion Impaired (≤80% DLCO)	Severe Restriction (≤50% TLC)	2nd	76	2nd ppFEV1 (%)
926	ppFEF 25/75 (%)	Diffusion Impaired (≤80% DLCO)	Severe Restriction (≤50% TLC)	2nd	100	2nd ppFEF 25/75 (%)
899	ppTLC (%)	Diffusion Impaired (≤80% DLCO)	Severe Restriction (≤50% TLC)	1st	49	1st ppTLC (%)
899	ppDLCO (%)	Diffusion Impaired (≤80% DLCO)	Severe Restriction (≤50% TLC)	1st	48	1st ppDLCO (%)
899	ppFVC (%)	Diffusion Impaired (≤80% DLCO)	Severe Restriction (≤50% TLC)	1st	64	1st ppFVC (%)
899	ppRV (%)	Diffusion Impaired (≤80% DLCO)	Severe Restriction (≤50% TLC)	1st	35	1st ppRV (%)
899	ppFEV1 (%)	Diffusion Impaired (≤80% DLCO)	Severe Restriction (≤50% TLC)	1st	66	1st ppFEV1 (%)
899	ppFEF 25/75 (%)	Diffusion Impaired (≤80% DLCO)	Severe Restriction (≤50% TLC)	1st	76	1st ppFEF 25/75 (%)
899	ppTLC (%)	Diffusion Impaired (≤80% DLCO)	Severe Restriction (≤50% TLC)	2nd	76	2nd ppTLC (%)
899	ppDLCO (%)	Diffusion Impaired (≤80% DLCO)	Severe Restriction (≤50% TLC)	2nd	45	2nd ppDLCO (%)
899	ppFVC (%)	Diffusion Impaired (≤80% DLCO)	Severe Restriction (≤50% TLC)	2nd	61	2nd ppFVC (%)
899	ppRV (%)	Diffusion Impaired (≤80% DLCO)	Severe Restriction (≤50% TLC)	2nd	131	2nd ppRV (%)
899	ppFEV1 (%)	Diffusion Impaired (≤80% DLCO)	Severe Restriction (≤50% TLC)	2nd	61	2nd ppFEV1 (%)
899	ppFEF 25/75 (%)	Diffusion Impaired (≤80% DLCO)	Severe Restriction (≤50% TLC)	2nd	66	2nd ppFEF 25/75 (%)
104	ppTLC (%)	Diffusion Impaired (≤80% DLCO)	Moderate Restriction (51-70% TLC)	1st	52	1st ppTLC (%)
104	ppDLCO (%)	Diffusion Impaired (≤80% DLCO)	Moderate Restriction (51-70% TLC)	1st	43	1st ppDLCO (%)
104	ppFVC (%)	Diffusion Impaired (≤80% DLCO)	Moderate Restriction (51-70% TLC)	1st	58	1st ppFVC (%)
104	ppRV (%)	Diffusion Impaired (≤80% DLCO)	Moderate Restriction (51-70% TLC)	1st	52	1st ppRV (%)
104	ppFEV1 (%)	Diffusion Impaired (≤80% DLCO)	Moderate Restriction (51-70% TLC)	1st	59	1st ppFEV1 (%)
104	ppFEF 25/75 (%)	Diffusion Impaired (≤80% DLCO)	Moderate Restriction (51-70% TLC)	1st	58	1st ppFEF 25/75 (%)
104	ppTLC (%)	Diffusion Impaired (≤80% DLCO)	Moderate Restriction (51-70% TLC)	2nd	52	2nd ppTLC (%)
104	ppDLCO (%)	Diffusion Impaired (≤80% DLCO)	Moderate Restriction (51-70% TLC)	2nd	50	2nd ppDLCO (%)
104	ppFVC (%)	Diffusion Impaired (≤80% DLCO)	Moderate Restriction (51-70% TLC)	2nd	58	2nd ppFVC (%)
104	ppRV (%)	Diffusion Impaired (≤80% DLCO)	Moderate Restriction (51-70% TLC)	2nd	51	2nd ppRV (%)
104	ppFEV1 (%)	Diffusion Impaired (≤80% DLCO)	Moderate Restriction (51-70% TLC)	2nd	61	2nd ppFEV1 (%)
104	ppFEF 25/75 (%)	Diffusion Impaired (≤80% DLCO)	Moderate Restriction (51-70% TLC)	2nd	78	2nd ppFEF 25/75 (%)
104	ppTLC (%)	Diffusion Impaired (≤80% DLCO)	Moderate Restriction (51-70% TLC)	3rd	49	3rd ppTLC (%)
104	ppDLCO (%)	Diffusion Impaired (≤80% DLCO)	Moderate Restriction (51-70% TLC)	3rd	53	3rd ppDLCO (%)
104	ppFVC (%)	Diffusion Impaired (≤80% DLCO)	Moderate Restriction (51-70% TLC)	3rd	56	3rd ppFVC (%)
104	ppRV (%)	Diffusion Impaired (≤80% DLCO)	Moderate Restriction (51-70% TLC)	3rd	47	3rd ppRV (%)
104	ppFEV1 (%)	Diffusion Impaired (≤80% DLCO)	Moderate Restriction (51-70% TLC)	3rd	56	3rd ppFEV1 (%)
104	ppFEF 25/75 (%)	Diffusion Impaired (≤80% DLCO)	Moderate Restriction (51-70% TLC)	3rd	60	3rd ppFEF 25/75 (%)
78	ppTLC (%)	Diffusion Impaired (≤80% DLCO)	Severe Restriction (≤50% TLC)	1st	45	1st ppTLC (%)
78	ppDLCO (%)	Diffusion Impaired (≤80% DLCO)	Severe Restriction (≤50% TLC)	1st	44	1st ppDLCO (%)
78	ppFVC (%)	Diffusion Impaired (≤80% DLCO)	Severe Restriction (≤50% TLC)	1st	69	1st ppFVC (%)
78	ppRV (%)	Diffusion Impaired (≤80% DLCO)	Severe Restriction (≤50% TLC)	1st	24	1st ppRV (%)
78	ppFEV1 (%)	Diffusion Impaired (≤80% DLCO)	Severe Restriction (≤50% TLC)	1st	78	1st ppFEV1 (%)
78	ppFEF 25/75 (%)	Diffusion Impaired (≤80% DLCO)	Severe Restriction (≤50% TLC)	1st	132	1st ppFEF 25/75 (%)
78	ppTLC (%)	Diffusion Impaired (≤80% DLCO)	Severe Restriction (≤50% TLC)	2nd	52	2nd ppTLC (%)
78	ppDLCO (%)	Diffusion Impaired (≤80% DLCO)	Severe Restriction (≤50% TLC)	2nd	45	2nd ppDLCO (%)
78	ppFVC (%)	Diffusion Impaired (≤80% DLCO)	Severe Restriction (≤50% TLC)	2nd	80	2nd ppFVC (%)
78	ppRV (%)	Diffusion Impaired (≤80% DLCO)	Severe Restriction (≤50% TLC)	2nd	27	2nd ppRV (%)
78	ppFEV1 (%)	Diffusion Impaired (≤80% DLCO)	Severe Restriction (≤50% TLC)	2nd	89	2nd ppFEV1 (%)
78	ppFEF 25/75 (%)	Diffusion Impaired (≤80% DLCO)	Severe Restriction (≤50% TLC)	2nd	139	2nd ppFEF 25/75 (%)
78	ppTLC (%)	Diffusion Impaired (≤80% DLCO)	Severe Restriction (≤50% TLC)	3rd	61	3rd ppTLC (%)
78	ppDLCO (%)	Diffusion Impaired (≤80% DLCO)	Severe Restriction (≤50% TLC)	3rd	45	3rd ppDLCO (%)
78	ppFVC (%)	Diffusion Impaired (≤80% DLCO)	Severe Restriction (≤50% TLC)	3rd	90	3rd ppFVC (%)
78	ppRV (%)	Diffusion Impaired (≤80% DLCO)	Severe Restriction (≤50% TLC)	3rd	37	3rd ppRV (%)
78	ppFEV1 (%)	Diffusion Impaired (≤80% DLCO)	Severe Restriction (≤50% TLC)	3rd	100	3rd ppFEV1 (%)
78	ppFEF 25/75 (%)	Diffusion Impaired (≤80% DLCO)	Severe Restriction (≤50% TLC)	3rd	133	3rd ppFEF 25/75 (%)
14	ppTLC (%)	Diffusion Normal (>80% DLCO)	Mild Restriction (71-80% TLC)	1st	73	1st ppTLC (%)
14	ppDLCO (%)	Diffusion Normal (>80% DLCO)	Mild Restriction (71-80% TLC)	1st	83	1st ppDLCO (%)
14	ppFVC (%)	Diffusion Normal (>80% DLCO)	Mild Restriction (71-80% TLC)	1st	86	1st ppFVC (%)
14	ppRV (%)	Diffusion Normal (>80% DLCO)	Mild Restriction (71-80% TLC)	1st	72	1st ppRV (%)
14	ppFEV1 (%)	Diffusion Normal (>80% DLCO)	Mild Restriction (71-80% TLC)	1st	84	1st ppFEV1 (%)
14	ppFEF 25/75 (%)	Diffusion Normal (>80% DLCO)	Mild Restriction (71-80% TLC)	1st	73	1st ppFEF 25/75 (%)
123	ppTLC (%)	Diffusion Impaired (≤80% DLCO)	Moderate Restriction (51-70% TLC)	1st	64	1st ppTLC (%)
123	ppDLCO (%)	Diffusion Impaired (≤80% DLCO)	Moderate Restriction (51-70% TLC)	1st	71	1st ppDLCO (%)
123	ppFVC (%)	Diffusion Impaired (≤80% DLCO)	Moderate Restriction (51-70% TLC)	1st	60	1st ppFVC (%)
123	ppRV (%)	Diffusion Impaired (≤80% DLCO)	Moderate Restriction (51-70% TLC)	1st	73	1st ppRV (%)
123	ppFEV1 (%)	Diffusion Impaired (≤80% DLCO)	Moderate Restriction (51-70% TLC)	1st	51	1st ppFEV1 (%)
123	ppFEF 25/75 (%)	Diffusion Impaired (≤80% DLCO)	Moderate Restriction (51-70% TLC)	1st	33	1st ppFEF 25/75 (%)
123	ppTLC (%)	Diffusion Impaired (≤80% DLCO)	Moderate Restriction (51-70% TLC)	2nd	66	2nd ppTLC (%)
123	ppDLCO (%)	Diffusion Impaired (≤80% DLCO)	Moderate Restriction (51-70% TLC)	2nd	61	2nd ppDLCO (%)
123	ppFVC (%)	Diffusion Impaired (≤80% DLCO)	Moderate Restriction (51-70% TLC)	2nd	64	2nd ppFVC (%)
123	ppRV (%)	Diffusion Impaired (≤80% DLCO)	Moderate Restriction (51-70% TLC)	2nd	72	2nd ppRV (%)
123	ppFEV1 (%)	Diffusion Impaired (≤80% DLCO)	Moderate Restriction (51-70% TLC)	2nd	60	2nd ppFEV1 (%)
123	ppFEF 25/75 (%)	Diffusion Impaired (≤80% DLCO)	Moderate Restriction (51-70% TLC)	2nd	48	2nd ppFEF 25/75 (%)
912	ppTLC (%)	Diffusion Normal (>80% DLCO)	No Restriction (>80% TLC)	1st	89	1st ppTLC (%)
912	ppDLCO (%)	Diffusion Normal (>80% DLCO)	No Restriction (>80% TLC)	1st	107	1st ppDLCO (%)
912	ppFVC (%)	Diffusion Normal (>80% DLCO)	No Restriction (>80% TLC)	1st	83	1st ppFVC (%)
912	ppRV (%)	Diffusion Normal (>80% DLCO)	No Restriction (>80% TLC)	1st	96	1st ppRV (%)
912	ppFEV1 (%)	Diffusion Normal (>80% DLCO)	No Restriction (>80% TLC)	1st	94	1st ppFEV1 (%)
912	ppFEF 25/75 (%)	Diffusion Normal (>80% DLCO)	No Restriction (>80% TLC)	1st	139	1st ppFEF 25/75 (%)
912	ppTLC (%)	Diffusion Normal (>80% DLCO)	No Restriction (>80% TLC)	2nd	69	2nd ppTLC (%)
912	ppDLCO (%)	Diffusion Normal (>80% DLCO)	No Restriction (>80% TLC)	2nd	95	2nd ppDLCO (%)
912	ppFVC (%)	Diffusion Normal (>80% DLCO)	No Restriction (>80% TLC)	2nd	79	2nd ppFVC (%)
912	ppRV (%)	Diffusion Normal (>80% DLCO)	No Restriction (>80% TLC)	2nd	55	2nd ppRV (%)
912	ppFEV1 (%)	Diffusion Normal (>80% DLCO)	No Restriction (>80% TLC)	2nd	89	2nd ppFEV1 (%)
912	ppFEF 25/75 (%)	Diffusion Normal (>80% DLCO)	No Restriction (>80% TLC)	2nd	133	2nd ppFEF 25/75 (%)
912	ppTLC (%)	Diffusion Normal (>80% DLCO)	No Restriction (>80% TLC)	3rd	66	3rd ppTLC (%)
912	ppDLCO (%)	Diffusion Normal (>80% DLCO)	No Restriction (>80% TLC)	3rd	97	3rd ppDLCO (%)
912	ppFVC (%)	Diffusion Normal (>80% DLCO)	No Restriction (>80% TLC)	3rd	78	3rd ppFVC (%)
912	ppRV (%)	Diffusion Normal (>80% DLCO)	No Restriction (>80% TLC)	3rd	48	3rd ppRV (%)
912	ppFEV1 (%)	Diffusion Normal (>80% DLCO)	No Restriction (>80% TLC)	3rd	90	3rd ppFEV1 (%)
912	ppFEF 25/75 (%)	Diffusion Normal (>80% DLCO)	No Restriction (>80% TLC)	3rd	143	3rd ppFEF 25/75 (%)
848	ppTLC (%)	Diffusion Normal (>80% DLCO)	No Restriction (>80% TLC)	1st	101	1st ppTLC (%)
848	ppDLCO (%)	Diffusion Normal (>80% DLCO)	No Restriction (>80% TLC)	1st	97	1st ppDLCO (%)
848	ppFVC (%)	Diffusion Normal (>80% DLCO)	No Restriction (>80% TLC)	1st	105	1st ppFVC (%)
848	ppRV (%)	Diffusion Normal (>80% DLCO)	No Restriction (>80% TLC)	1st	83	1st ppRV (%)
848	ppFEV1 (%)	Diffusion Normal (>80% DLCO)	No Restriction (>80% TLC)	1st	104	1st ppFEV1 (%)
848	ppFEF 25/75 (%)	Diffusion Normal (>80% DLCO)	No Restriction (>80% TLC)	1st	108	1st ppFEF 25/75 (%)
840	ppTLC (%)	Diffusion Impaired (≤80% DLCO)	Mild Restriction (71-80% TLC)	1st	73	1st ppTLC (%)
840	ppDLCO (%)	Diffusion Impaired (≤80% DLCO)	Mild Restriction (71-80% TLC)	1st	55	1st ppDLCO (%)
840	ppFVC (%)	Diffusion Impaired (≤80% DLCO)	Mild Restriction (71-80% TLC)	1st	71	1st ppFVC (%)
840	ppRV (%)	Diffusion Impaired (≤80% DLCO)	Mild Restriction (71-80% TLC)	1st	78	1st ppRV (%)
840	ppFEV1 (%)	Diffusion Impaired (≤80% DLCO)	Mild Restriction (71-80% TLC)	1st	63	1st ppFEV1 (%)
840	ppFEF 25/75 (%)	Diffusion Impaired (≤80% DLCO)	Mild Restriction (71-80% TLC)	1st	40	1st ppFEF 25/75 (%)
866	ppTLC (%)	Diffusion Normal (>80% DLCO)	Moderate Restriction (51-70% TLC)	1st	70	1st ppTLC (%)
866	ppDLCO (%)	Diffusion Normal (>80% DLCO)	Moderate Restriction (51-70% TLC)	1st	85	1st ppDLCO (%)
866	ppFVC (%)	Diffusion Normal (>80% DLCO)	Moderate Restriction (51-70% TLC)	1st	87	1st ppFVC (%)
866	ppRV (%)	Diffusion Normal (>80% DLCO)	Moderate Restriction (51-70% TLC)	1st	45	1st ppRV (%)
866	ppFEV1 (%)	Diffusion Normal (>80% DLCO)	Moderate Restriction (51-70% TLC)	1st	88	1st ppFEV1 (%)
866	ppFEF 25/75 (%)	Diffusion Normal (>80% DLCO)	Moderate Restriction (51-70% TLC)	1st	95	1st ppFEF 25/75 (%)
866	ppTLC (%)	Diffusion Normal (>80% DLCO)	Moderate Restriction (51-70% TLC)	2nd	78	2nd ppTLC (%)
866	ppDLCO (%)	Diffusion Normal (>80% DLCO)	Moderate Restriction (51-70% TLC)	2nd	94	2nd ppDLCO (%)
866	ppFVC (%)	Diffusion Normal (>80% DLCO)	Moderate Restriction (51-70% TLC)	2nd	89	2nd ppFVC (%)
866	ppRV (%)	Diffusion Normal (>80% DLCO)	Moderate Restriction (51-70% TLC)	2nd	55	2nd ppRV (%)
866	ppFEV1 (%)	Diffusion Normal (>80% DLCO)	Moderate Restriction (51-70% TLC)	2nd	87	2nd ppFEV1 (%)
866	ppFEF 25/75 (%)	Diffusion Normal (>80% DLCO)	Moderate Restriction (51-70% TLC)	2nd	81	2nd ppFEF 25/75 (%)
893	ppTLC (%)	Diffusion Impaired (≤80% DLCO)	No Restriction (>80% TLC)	1st	101	1st ppTLC (%)
893	ppDLCO (%)	Diffusion Impaired (≤80% DLCO)	No Restriction (>80% TLC)	1st	72	1st ppDLCO (%)
893	ppFVC (%)	Diffusion Impaired (≤80% DLCO)	No Restriction (>80% TLC)	1st	102	1st ppFVC (%)
893	ppRV (%)	Diffusion Impaired (≤80% DLCO)	No Restriction (>80% TLC)	1st	80	1st ppRV (%)
893	ppFEV1 (%)	Diffusion Impaired (≤80% DLCO)	No Restriction (>80% TLC)	1st	95	1st ppFEV1 (%)
893	ppFEF 25/75 (%)	Diffusion Impaired (≤80% DLCO)	No Restriction (>80% TLC)	1st	74	1st ppFEF 25/75 (%)
893	ppTLC (%)	Diffusion Impaired (≤80% DLCO)	No Restriction (>80% TLC)	2nd	107	2nd ppTLC (%)
893	ppDLCO (%)	Diffusion Impaired (≤80% DLCO)	No Restriction (>80% TLC)	2nd	92	2nd ppDLCO (%)
893	ppFVC (%)	Diffusion Impaired (≤80% DLCO)	No Restriction (>80% TLC)	2nd	101	2nd ppFVC (%)
893	ppRV (%)	Diffusion Impaired (≤80% DLCO)	No Restriction (>80% TLC)	2nd	96	2nd ppRV (%)
893	ppFEV1 (%)	Diffusion Impaired (≤80% DLCO)	No Restriction (>80% TLC)	2nd	96	2nd ppFEV1 (%)
893	ppFEF 25/75 (%)	Diffusion Impaired (≤80% DLCO)	No Restriction (>80% TLC)	2nd	74	2nd ppFEF 25/75 (%)
815	ppTLC (%)	Diffusion Impaired (≤80% DLCO)	Moderate Restriction (51-70% TLC)	1st	64	1st ppTLC (%)
815	ppDLCO (%)	Diffusion Impaired (≤80% DLCO)	Moderate Restriction (51-70% TLC)	1st	75	1st ppDLCO (%)
815	ppFVC (%)	Diffusion Impaired (≤80% DLCO)	Moderate Restriction (51-70% TLC)	1st	102	1st ppFVC (%)
815	ppRV (%)	Diffusion Impaired (≤80% DLCO)	Moderate Restriction (51-70% TLC)	1st	25	1st ppRV (%)
815	ppFEV1 (%)	Diffusion Impaired (≤80% DLCO)	Moderate Restriction (51-70% TLC)	1st	106	1st ppFEV1 (%)
815	ppFEF 25/75 (%)	Diffusion Impaired (≤80% DLCO)	Moderate Restriction (51-70% TLC)	1st	116	1st ppFEF 25/75 (%)
815	ppTLC (%)	Diffusion Impaired (≤80% DLCO)	Moderate Restriction (51-70% TLC)	2nd	54	2nd ppTLC (%)
815	ppDLCO (%)	Diffusion Impaired (≤80% DLCO)	Moderate Restriction (51-70% TLC)	2nd	69	2nd ppDLCO (%)
815	ppFVC (%)	Diffusion Impaired (≤80% DLCO)	Moderate Restriction (51-70% TLC)	2nd	93	2nd ppFVC (%)
815	ppRV (%)	Diffusion Impaired (≤80% DLCO)	Moderate Restriction (51-70% TLC)	2nd	8	2nd ppRV (%)
815	ppFEV1 (%)	Diffusion Impaired (≤80% DLCO)	Moderate Restriction (51-70% TLC)	2nd	96	2nd ppFEV1 (%)
815	ppFEF 25/75 (%)	Diffusion Impaired (≤80% DLCO)	Moderate Restriction (51-70% TLC)	2nd	102	2nd ppFEF 25/75 (%)
815	ppDLCO (%)	Diffusion Impaired (≤80% DLCO)	Moderate Restriction (51-70% TLC)	3rd	80	3rd ppDLCO (%)
815	ppFVC (%)	Diffusion Impaired (≤80% DLCO)	Moderate Restriction (51-70% TLC)	3rd	102	3rd ppFVC (%)
815	ppFEV1 (%)	Diffusion Impaired (≤80% DLCO)	Moderate Restriction (51-70% TLC)	3rd	111	3rd ppFEV1 (%)
815	ppFEF 25/75 (%)	Diffusion Impaired (≤80% DLCO)	Moderate Restriction (51-70% TLC)	3rd	155	3rd ppFEF 25/75 (%)
856	ppTLC (%)	Diffusion Impaired (≤80% DLCO)	Moderate Restriction (51-70% TLC)	1st	52	1st ppTLC (%)
856	ppDLCO (%)	Diffusion Impaired (≤80% DLCO)	Moderate Restriction (51-70% TLC)	1st	46	1st ppDLCO (%)
856	ppFVC (%)	Diffusion Impaired (≤80% DLCO)	Moderate Restriction (51-70% TLC)	1st	62	1st ppFVC (%)
856	ppRV (%)	Diffusion Impaired (≤80% DLCO)	Moderate Restriction (51-70% TLC)	1st	23	1st ppRV (%)
856	ppFEV1 (%)	Diffusion Impaired (≤80% DLCO)	Moderate Restriction (51-70% TLC)	1st	72	1st ppFEV1 (%)
856	ppFEF 25/75 (%)	Diffusion Impaired (≤80% DLCO)	Moderate Restriction (51-70% TLC)	1st	180	1st ppFEF 25/75 (%)
856	ppTLC (%)	Diffusion Impaired (≤80% DLCO)	Moderate Restriction (51-70% TLC)	2nd	70	2nd ppTLC (%)
856	ppDLCO (%)	Diffusion Impaired (≤80% DLCO)	Moderate Restriction (51-70% TLC)	2nd	65	2nd ppDLCO (%)
856	ppFVC (%)	Diffusion Impaired (≤80% DLCO)	Moderate Restriction (51-70% TLC)	2nd	82	2nd ppFVC (%)
856	ppRV (%)	Diffusion Impaired (≤80% DLCO)	Moderate Restriction (51-70% TLC)	2nd	42	2nd ppRV (%)
856	ppFEV1 (%)	Diffusion Impaired (≤80% DLCO)	Moderate Restriction (51-70% TLC)	2nd	95	2nd ppFEV1 (%)
856	ppFEF 25/75 (%)	Diffusion Impaired (≤80% DLCO)	Moderate Restriction (51-70% TLC)	2nd	183	2nd ppFEF 25/75 (%)
856	ppTLC (%)	Diffusion Impaired (≤80% DLCO)	Moderate Restriction (51-70% TLC)	3rd	66	3rd ppTLC (%)
856	ppDLCO (%)	Diffusion Impaired (≤80% DLCO)	Moderate Restriction (51-70% TLC)	3rd	70	3rd ppDLCO (%)
856	ppFVC (%)	Diffusion Impaired (≤80% DLCO)	Moderate Restriction (51-70% TLC)	3rd	85	3rd ppFVC (%)
856	ppRV (%)	Diffusion Impaired (≤80% DLCO)	Moderate Restriction (51-70% TLC)	3rd	27	3rd ppRV (%)
856	ppFEV1 (%)	Diffusion Impaired (≤80% DLCO)	Moderate Restriction (51-70% TLC)	3rd	98	3rd ppFEV1 (%)
856	ppFEF 25/75 (%)	Diffusion Impaired (≤80% DLCO)	Moderate Restriction (51-70% TLC)	3rd	169	3rd ppFEF 25/75 (%)
125	ppTLC (%)	Diffusion Impaired (≤80% DLCO)	Mild Restriction (71-80% TLC)	1st	72	1st ppTLC (%)
125	ppDLCO (%)	Diffusion Impaired (≤80% DLCO)	Mild Restriction (71-80% TLC)	1st	62	1st ppDLCO (%)
125	ppFVC (%)	Diffusion Impaired (≤80% DLCO)	Mild Restriction (71-80% TLC)	1st	75	1st ppFVC (%)
125	ppRV (%)	Diffusion Impaired (≤80% DLCO)	Mild Restriction (71-80% TLC)	1st	54	1st ppRV (%)
125	ppFEV1 (%)	Diffusion Impaired (≤80% DLCO)	Mild Restriction (71-80% TLC)	1st	83	1st ppFEV1 (%)
125	ppFEF 25/75 (%)	Diffusion Impaired (≤80% DLCO)	Mild Restriction (71-80% TLC)	1st	145	1st ppFEF 25/75 (%)
125	ppTLC (%)	Diffusion Impaired (≤80% DLCO)	Mild Restriction (71-80% TLC)	2nd	67	2nd ppTLC (%)
125	ppDLCO (%)	Diffusion Impaired (≤80% DLCO)	Mild Restriction (71-80% TLC)	2nd	56	2nd ppDLCO (%)
125	ppFVC (%)	Diffusion Impaired (≤80% DLCO)	Mild Restriction (71-80% TLC)	2nd	75	2nd ppFVC (%)
125	ppRV (%)	Diffusion Impaired (≤80% DLCO)	Mild Restriction (71-80% TLC)	2nd	37	2nd ppRV (%)
125	ppFEV1 (%)	Diffusion Impaired (≤80% DLCO)	Mild Restriction (71-80% TLC)	2nd	80	2nd ppFEV1 (%)
125	ppFEF 25/75 (%)	Diffusion Impaired (≤80% DLCO)	Mild Restriction (71-80% TLC)	2nd	113	2nd ppFEF 25/75 (%)
125	ppDLCO (%)	Diffusion Impaired (≤80% DLCO)	Mild Restriction (71-80% TLC)	3rd	80	3rd ppDLCO (%)
125	ppFVC (%)	Diffusion Impaired (≤80% DLCO)	Mild Restriction (71-80% TLC)	3rd	73	3rd ppFVC (%)
125	ppFEV1 (%)	Diffusion Impaired (≤80% DLCO)	Mild Restriction (71-80% TLC)	3rd	78	3rd ppFEV1 (%)
125	ppFEF 25/75 (%)	Diffusion Impaired (≤80% DLCO)	Mild Restriction (71-80% TLC)	3rd	110	3rd ppFEF 25/75 (%)
126	ppTLC (%)	Diffusion Normal (>80% DLCO)	No Restriction (>80% TLC)	1st	95	1st ppTLC (%)
126	ppDLCO (%)	Diffusion Normal (>80% DLCO)	No Restriction (>80% TLC)	1st	87	1st ppDLCO (%)
126	ppFVC (%)	Diffusion Normal (>80% DLCO)	No Restriction (>80% TLC)	1st	96	1st ppFVC (%)
126	ppRV (%)	Diffusion Normal (>80% DLCO)	No Restriction (>80% TLC)	1st	76	1st ppRV (%)
126	ppFEV1 (%)	Diffusion Normal (>80% DLCO)	No Restriction (>80% TLC)	1st	80	1st ppFEV1 (%)
126	ppFEF 25/75 (%)	Diffusion Normal (>80% DLCO)	No Restriction (>80% TLC)	1st	54	1st ppFEF 25/75 (%)
129	ppTLC (%)	Diffusion Normal (>80% DLCO)	Mild Restriction (71-80% TLC)	1st	79	1st ppTLC (%)
129	ppDLCO (%)	Diffusion Normal (>80% DLCO)	Mild Restriction (71-80% TLC)	1st	96	1st ppDLCO (%)
129	ppFVC (%)	Diffusion Normal (>80% DLCO)	Mild Restriction (71-80% TLC)	1st	112	1st ppFVC (%)
129	ppRV (%)	Diffusion Normal (>80% DLCO)	Mild Restriction (71-80% TLC)	1st	6	1st ppRV (%)
129	ppFEV1 (%)	Diffusion Normal (>80% DLCO)	Mild Restriction (71-80% TLC)	1st	125	1st ppFEV1 (%)
129	ppFEF 25/75 (%)	Diffusion Normal (>80% DLCO)	Mild Restriction (71-80% TLC)	1st	216	1st ppFEF 25/75 (%)
130	ppTLC (%)	Diffusion Impaired (≤80% DLCO)	Severe Restriction (≤50% TLC)	1st	36	1st ppTLC (%)
130	ppDLCO (%)	Diffusion Impaired (≤80% DLCO)	Severe Restriction (≤50% TLC)	1st	35	1st ppDLCO (%)
130	ppFVC (%)	Diffusion Impaired (≤80% DLCO)	Severe Restriction (≤50% TLC)	1st	40	1st ppFVC (%)
130	ppRV (%)	Diffusion Impaired (≤80% DLCO)	Severe Restriction (≤50% TLC)	1st	27	1st ppRV (%)
130	ppFEV1 (%)	Diffusion Impaired (≤80% DLCO)	Severe Restriction (≤50% TLC)	1st	46	1st ppFEV1 (%)
130	ppFEF 25/75 (%)	Diffusion Impaired (≤80% DLCO)	Severe Restriction (≤50% TLC)	1st	99	1st ppFEF 25/75 (%)
132	ppTLC (%)	Diffusion Impaired (≤80% DLCO)	Moderate Restriction (51-70% TLC)	1st	54	1st ppTLC (%)
132	ppDLCO (%)	Diffusion Impaired (≤80% DLCO)	Moderate Restriction (51-70% TLC)	1st	64	1st ppDLCO (%)
132	ppFVC (%)	Diffusion Impaired (≤80% DLCO)	Moderate Restriction (51-70% TLC)	1st	65	1st ppFVC (%)
132	ppRV (%)	Diffusion Impaired (≤80% DLCO)	Moderate Restriction (51-70% TLC)	1st	31	1st ppRV (%)
132	ppFEV1 (%)	Diffusion Impaired (≤80% DLCO)	Moderate Restriction (51-70% TLC)	1st	66	1st ppFEV1 (%)
132	ppFEF 25/75 (%)	Diffusion Impaired (≤80% DLCO)	Moderate Restriction (51-70% TLC)	1st	88	1st ppFEF 25/75 (%)
132	ppTLC (%)	Diffusion Impaired (≤80% DLCO)	Moderate Restriction (51-70% TLC)	2nd	66	2nd ppTLC (%)
132	ppDLCO (%)	Diffusion Impaired (≤80% DLCO)	Moderate Restriction (51-70% TLC)	2nd	68	2nd ppDLCO (%)
132	ppFVC (%)	Diffusion Impaired (≤80% DLCO)	Moderate Restriction (51-70% TLC)	2nd	64	2nd ppFVC (%)
132	ppRV (%)	Diffusion Impaired (≤80% DLCO)	Moderate Restriction (51-70% TLC)	2nd	62	2nd ppRV (%)
132	ppFEV1 (%)	Diffusion Impaired (≤80% DLCO)	Moderate Restriction (51-70% TLC)	2nd	63	2nd ppFEV1 (%)
132	ppFEF 25/75 (%)	Diffusion Impaired (≤80% DLCO)	Moderate Restriction (51-70% TLC)	2nd	59	2nd ppFEF 25/75 (%)
133	ppTLC (%)	Diffusion Impaired (≤80% DLCO)	Mild Restriction (71-80% TLC)	1st	74	1st ppTLC (%)
133	ppDLCO (%)	Diffusion Impaired (≤80% DLCO)	Mild Restriction (71-80% TLC)	1st	62	1st ppDLCO (%)
133	ppFVC (%)	Diffusion Impaired (≤80% DLCO)	Mild Restriction (71-80% TLC)	1st	73	1st ppFVC (%)
133	ppRV (%)	Diffusion Impaired (≤80% DLCO)	Mild Restriction (71-80% TLC)	1st	86	1st ppRV (%)
133	ppFEV1 (%)	Diffusion Impaired (≤80% DLCO)	Mild Restriction (71-80% TLC)	1st	67	1st ppFEV1 (%)
133	ppFEF 25/75 (%)	Diffusion Impaired (≤80% DLCO)	Mild Restriction (71-80% TLC)	1st	53	1st ppFEF 25/75 (%)
133	ppTLC (%)	Diffusion Impaired (≤80% DLCO)	Mild Restriction (71-80% TLC)	2nd	73	2nd ppTLC (%)
133	ppDLCO (%)	Diffusion Impaired (≤80% DLCO)	Mild Restriction (71-80% TLC)	2nd	56	2nd ppDLCO (%)
133	ppFVC (%)	Diffusion Impaired (≤80% DLCO)	Mild Restriction (71-80% TLC)	2nd	89	2nd ppFVC (%)
133	ppRV (%)	Diffusion Impaired (≤80% DLCO)	Mild Restriction (71-80% TLC)	2nd	68	2nd ppRV (%)
133	ppFEV1 (%)	Diffusion Impaired (≤80% DLCO)	Mild Restriction (71-80% TLC)	2nd	79	2nd ppFEV1 (%)
133	ppFEF 25/75 (%)	Diffusion Impaired (≤80% DLCO)	Mild Restriction (71-80% TLC)	2nd	57	2nd ppFEF 25/75 (%)
131	ppTLC (%)	Diffusion Impaired (≤80% DLCO)	Mild Restriction (71-80% TLC)	1st	79	1st ppTLC (%)
131	ppDLCO (%)	Diffusion Impaired (≤80% DLCO)	Mild Restriction (71-80% TLC)	1st	30	1st ppDLCO (%)
131	ppFVC (%)	Diffusion Impaired (≤80% DLCO)	Mild Restriction (71-80% TLC)	1st	88	1st ppFVC (%)
131	ppRV (%)	Diffusion Impaired (≤80% DLCO)	Mild Restriction (71-80% TLC)	1st	76	1st ppRV (%)
131	ppFEV1 (%)	Diffusion Impaired (≤80% DLCO)	Mild Restriction (71-80% TLC)	1st	81	1st ppFEV1 (%)
131	ppFEF 25/75 (%)	Diffusion Impaired (≤80% DLCO)	Mild Restriction (71-80% TLC)	1st	60	1st ppFEF 25/75 (%)
131	ppTLC (%)	Diffusion Impaired (≤80% DLCO)	Mild Restriction (71-80% TLC)	2nd	65	2nd ppTLC (%)
131	ppDLCO (%)	Diffusion Impaired (≤80% DLCO)	Mild Restriction (71-80% TLC)	2nd	29	2nd ppDLCO (%)
131	ppFVC (%)	Diffusion Impaired (≤80% DLCO)	Mild Restriction (71-80% TLC)	2nd	70	2nd ppFVC (%)
131	ppRV (%)	Diffusion Impaired (≤80% DLCO)	Mild Restriction (71-80% TLC)	2nd	69	2nd ppRV (%)
131	ppFEV1 (%)	Diffusion Impaired (≤80% DLCO)	Mild Restriction (71-80% TLC)	2nd	56	2nd ppFEV1 (%)
131	ppFEF 25/75 (%)	Diffusion Impaired (≤80% DLCO)	Mild Restriction (71-80% TLC)	2nd	29	2nd ppFEF 25/75 (%)
134	ppTLC (%)	Diffusion Normal (>80% DLCO)	No Restriction (>80% TLC)	1st	92	1st ppTLC (%)
134	ppDLCO (%)	Diffusion Normal (>80% DLCO)	No Restriction (>80% TLC)	1st	96	1st ppDLCO (%)
134	ppFVC (%)	Diffusion Normal (>80% DLCO)	No Restriction (>80% TLC)	1st	95	1st ppFVC (%)
134	ppRV (%)	Diffusion Normal (>80% DLCO)	No Restriction (>80% TLC)	1st	65	1st ppRV (%)
134	ppFEV1 (%)	Diffusion Normal (>80% DLCO)	No Restriction (>80% TLC)	1st	87	1st ppFEV1 (%)
134	ppFEF 25/75 (%)	Diffusion Normal (>80% DLCO)	No Restriction (>80% TLC)	1st	66	1st ppFEF 25/75 (%)
136	ppTLC (%)	Diffusion Impaired (≤80% DLCO)	Moderate Restriction (51-70% TLC)	1st	66	1st ppTLC (%)
136	ppDLCO (%)	Diffusion Impaired (≤80% DLCO)	Moderate Restriction (51-70% TLC)	1st	61	1st ppDLCO (%)
136	ppFVC (%)	Diffusion Impaired (≤80% DLCO)	Moderate Restriction (51-70% TLC)	1st	82	1st ppFVC (%)
136	ppRV (%)	Diffusion Impaired (≤80% DLCO)	Moderate Restriction (51-70% TLC)	1st	44	1st ppRV (%)
136	ppFEV1 (%)	Diffusion Impaired (≤80% DLCO)	Moderate Restriction (51-70% TLC)	1st	48	1st ppFEV1 (%)
136	ppFEF 25/75 (%)	Diffusion Impaired (≤80% DLCO)	Moderate Restriction (51-70% TLC)	1st	32	1st ppFEF 25/75 (%)
136	ppTLC (%)	Diffusion Impaired (≤80% DLCO)	Moderate Restriction (51-70% TLC)	2nd	66	2nd ppTLC (%)
136	ppDLCO (%)	Diffusion Impaired (≤80% DLCO)	Moderate Restriction (51-70% TLC)	2nd	78	2nd ppDLCO (%)
136	ppFVC (%)	Diffusion Impaired (≤80% DLCO)	Moderate Restriction (51-70% TLC)	2nd	75	2nd ppFVC (%)
136	ppRV (%)	Diffusion Impaired (≤80% DLCO)	Moderate Restriction (51-70% TLC)	2nd	60	2nd ppRV (%)
136	ppFEV1 (%)	Diffusion Impaired (≤80% DLCO)	Moderate Restriction (51-70% TLC)	2nd	62	2nd ppFEV1 (%)
136	ppFEF 25/75 (%)	Diffusion Impaired (≤80% DLCO)	Moderate Restriction (51-70% TLC)	2nd	6	2nd ppFEF 25/75 (%)
135	ppTLC (%)	Diffusion Impaired (≤80% DLCO)	Moderate Restriction (51-70% TLC)	1st	69	1st ppTLC (%)
135	ppDLCO (%)	Diffusion Impaired (≤80% DLCO)	Moderate Restriction (51-70% TLC)	1st	67	1st ppDLCO (%)
135	ppFVC (%)	Diffusion Impaired (≤80% DLCO)	Moderate Restriction (51-70% TLC)	1st	84	1st ppFVC (%)
135	ppRV (%)	Diffusion Impaired (≤80% DLCO)	Moderate Restriction (51-70% TLC)	1st	50	1st ppRV (%)
135	ppFEV1 (%)	Diffusion Impaired (≤80% DLCO)	Moderate Restriction (51-70% TLC)	1st	82	1st ppFEV1 (%)
135	ppFEF 25/75 (%)	Diffusion Impaired (≤80% DLCO)	Moderate Restriction (51-70% TLC)	1st	50	1st ppFEF 25/75 (%)
137	ppTLC (%)	Diffusion Normal (>80% DLCO)	No Restriction (>80% TLC)	1st	82	1st ppTLC (%)
137	ppDLCO (%)	Diffusion Normal (>80% DLCO)	No Restriction (>80% TLC)	1st	93	1st ppDLCO (%)
137	ppFVC (%)	Diffusion Normal (>80% DLCO)	No Restriction (>80% TLC)	1st	105	1st ppFVC (%)
137	ppRV (%)	Diffusion Normal (>80% DLCO)	No Restriction (>80% TLC)	1st	44	1st ppRV (%)
137	ppFEV1 (%)	Diffusion Normal (>80% DLCO)	No Restriction (>80% TLC)	1st	100	1st ppFEV1 (%)
137	ppFEF 25/75 (%)	Diffusion Normal (>80% DLCO)	No Restriction (>80% TLC)	1st	81	1st ppFEF 25/75 (%)
138	ppTLC (%)	Diffusion Normal (>80% DLCO)	No Restriction (>80% TLC)	1st	105	1st ppTLC (%)
138	ppDLCO (%)	Diffusion Normal (>80% DLCO)	No Restriction (>80% TLC)	1st	82	1st ppDLCO (%)
138	ppFVC (%)	Diffusion Normal (>80% DLCO)	No Restriction (>80% TLC)	1st	96	1st ppFVC (%)
138	ppRV (%)	Diffusion Normal (>80% DLCO)	No Restriction (>80% TLC)	1st	103	1st ppRV (%)
138	ppFEV1 (%)	Diffusion Normal (>80% DLCO)	No Restriction (>80% TLC)	1st	91	1st ppFEV1 (%)
138	ppFEF 25/75 (%)	Diffusion Normal (>80% DLCO)	No Restriction (>80% TLC)	1st	79	1st ppFEF 25/75 (%)
139	ppTLC (%)	Diffusion Impaired (≤80% DLCO)	No Restriction (>80% TLC)	1st	98	1st ppTLC (%)
139	ppDLCO (%)	Diffusion Impaired (≤80% DLCO)	No Restriction (>80% TLC)	1st	78	1st ppDLCO (%)
139	ppFVC (%)	Diffusion Impaired (≤80% DLCO)	No Restriction (>80% TLC)	1st	91	1st ppFVC (%)
139	ppRV (%)	Diffusion Impaired (≤80% DLCO)	No Restriction (>80% TLC)	1st	100	1st ppRV (%)
139	ppFEV1 (%)	Diffusion Impaired (≤80% DLCO)	No Restriction (>80% TLC)	1st	92	1st ppFEV1 (%)
139	ppFEF 25/75 (%)	Diffusion Impaired (≤80% DLCO)	No Restriction (>80% TLC)	1st	92	1st ppFEF 25/75 (%)
140	ppTLC (%)	Diffusion Impaired (≤80% DLCO)	Moderate Restriction (51-70% TLC)	1st	60	1st ppTLC (%)
140	ppDLCO (%)	Diffusion Impaired (≤80% DLCO)	Moderate Restriction (51-70% TLC)	1st	68	1st ppDLCO (%)
140	ppFVC (%)	Diffusion Impaired (≤80% DLCO)	Moderate Restriction (51-70% TLC)	1st	84	1st ppFVC (%)
140	ppRV (%)	Diffusion Impaired (≤80% DLCO)	Moderate Restriction (51-70% TLC)	1st	30	1st ppRV (%)
140	ppFEV1 (%)	Diffusion Impaired (≤80% DLCO)	Moderate Restriction (51-70% TLC)	1st	88	1st ppFEV1 (%)
140	ppFEF 25/75 (%)	Diffusion Impaired (≤80% DLCO)	Moderate Restriction (51-70% TLC)	1st	113	1st ppFEF 25/75 (%)
140	ppTLC (%)	Diffusion Impaired (≤80% DLCO)	Moderate Restriction (51-70% TLC)	2nd	64	2nd ppTLC (%)
140	ppDLCO (%)	Diffusion Impaired (≤80% DLCO)	Moderate Restriction (51-70% TLC)	2nd	82	2nd ppDLCO (%)
140	ppFVC (%)	Diffusion Impaired (≤80% DLCO)	Moderate Restriction (51-70% TLC)	2nd	77	2nd ppFVC (%)
140	ppRV (%)	Diffusion Impaired (≤80% DLCO)	Moderate Restriction (51-70% TLC)	2nd	33	2nd ppRV (%)
140	ppFEV1 (%)	Diffusion Impaired (≤80% DLCO)	Moderate Restriction (51-70% TLC)	2nd	83	2nd ppFEV1 (%)
140	ppFEF 25/75 (%)	Diffusion Impaired (≤80% DLCO)	Moderate Restriction (51-70% TLC)	2nd	118	2nd ppFEF 25/75 (%)
140	ppDLCO (%)	Diffusion Impaired (≤80% DLCO)	Moderate Restriction (51-70% TLC)	3rd	87	3rd ppDLCO (%)
140	ppFVC (%)	Diffusion Impaired (≤80% DLCO)	Moderate Restriction (51-70% TLC)	3rd	108	3rd ppFVC (%)
140	ppFEV1 (%)	Diffusion Impaired (≤80% DLCO)	Moderate Restriction (51-70% TLC)	3rd	117	3rd ppFEV1 (%)
140	ppFEF 25/75 (%)	Diffusion Impaired (≤80% DLCO)	Moderate Restriction (51-70% TLC)	3rd	181	3rd ppFEF 25/75 (%)
143	ppTLC (%)	Diffusion Normal (>80% DLCO)	Mild Restriction (71-80% TLC)	1st	75	1st ppTLC (%)
143	ppDLCO (%)	Diffusion Normal (>80% DLCO)	Mild Restriction (71-80% TLC)	1st	93	1st ppDLCO (%)
143	ppFVC (%)	Diffusion Normal (>80% DLCO)	Mild Restriction (71-80% TLC)	1st	80	1st ppFVC (%)
143	ppRV (%)	Diffusion Normal (>80% DLCO)	Mild Restriction (71-80% TLC)	1st	44	1st ppRV (%)
143	ppFEV1 (%)	Diffusion Normal (>80% DLCO)	Mild Restriction (71-80% TLC)	1st	77	1st ppFEV1 (%)
143	ppFEF 25/75 (%)	Diffusion Normal (>80% DLCO)	Mild Restriction (71-80% TLC)	1st	67	1st ppFEF 25/75 (%)
144	ppTLC (%)	Diffusion Impaired (≤80% DLCO)	Moderate Restriction (51-70% TLC)	1st	64	1st ppTLC (%)
144	ppDLCO (%)	Diffusion Impaired (≤80% DLCO)	Moderate Restriction (51-70% TLC)	1st	52	1st ppDLCO (%)
144	ppFVC (%)	Diffusion Impaired (≤80% DLCO)	Moderate Restriction (51-70% TLC)	1st	60	1st ppFVC (%)
144	ppRV (%)	Diffusion Impaired (≤80% DLCO)	Moderate Restriction (51-70% TLC)	1st	82	1st ppRV (%)
144	ppFEV1 (%)	Diffusion Impaired (≤80% DLCO)	Moderate Restriction (51-70% TLC)	1st	62	1st ppFEV1 (%)
144	ppFEF 25/75 (%)	Diffusion Impaired (≤80% DLCO)	Moderate Restriction (51-70% TLC)	1st	69	1st ppFEF 25/75 (%)
144	ppTLC (%)	Diffusion Impaired (≤80% DLCO)	Moderate Restriction (51-70% TLC)	2nd	66	2nd ppTLC (%)
144	ppDLCO (%)	Diffusion Impaired (≤80% DLCO)	Moderate Restriction (51-70% TLC)	2nd	56	2nd ppDLCO (%)
144	ppFVC (%)	Diffusion Impaired (≤80% DLCO)	Moderate Restriction (51-70% TLC)	2nd	66	2nd ppFVC (%)
144	ppRV (%)	Diffusion Impaired (≤80% DLCO)	Moderate Restriction (51-70% TLC)	2nd	52	2nd ppRV (%)
144	ppFEV1 (%)	Diffusion Impaired (≤80% DLCO)	Moderate Restriction (51-70% TLC)	2nd	65	2nd ppFEV1 (%)
144	ppFEF 25/75 (%)	Diffusion Impaired (≤80% DLCO)	Moderate Restriction (51-70% TLC)	2nd	61	2nd ppFEF 25/75 (%)
145	ppTLC (%)	Diffusion Normal (>80% DLCO)	Moderate Restriction (51-70% TLC)	1st	68	1st ppTLC (%)
145	ppDLCO (%)	Diffusion Normal (>80% DLCO)	Moderate Restriction (51-70% TLC)	1st	98	1st ppDLCO (%)
145	ppFVC (%)	Diffusion Normal (>80% DLCO)	Moderate Restriction (51-70% TLC)	1st	73	1st ppFVC (%)
145	ppRV (%)	Diffusion Normal (>80% DLCO)	Moderate Restriction (51-70% TLC)	1st	69	1st ppRV (%)
145	ppFEV1 (%)	Diffusion Normal (>80% DLCO)	Moderate Restriction (51-70% TLC)	1st	77	1st ppFEV1 (%)
145	ppFEF 25/75 (%)	Diffusion Normal (>80% DLCO)	Moderate Restriction (51-70% TLC)	1st	91	1st ppFEF 25/75 (%)
147	ppTLC (%)	Diffusion Normal (>80% DLCO)	Mild Restriction (71-80% TLC)	1st	80	1st ppTLC (%)
147	ppDLCO (%)	Diffusion Normal (>80% DLCO)	Mild Restriction (71-80% TLC)	1st	82	1st ppDLCO (%)
147	ppFVC (%)	Diffusion Normal (>80% DLCO)	Mild Restriction (71-80% TLC)	1st	111	1st ppFVC (%)
147	ppRV (%)	Diffusion Normal (>80% DLCO)	Mild Restriction (71-80% TLC)	1st	50	1st ppRV (%)
147	ppFEV1 (%)	Diffusion Normal (>80% DLCO)	Mild Restriction (71-80% TLC)	1st	120	1st ppFEV1 (%)
147	ppFEF 25/75 (%)	Diffusion Normal (>80% DLCO)	Mild Restriction (71-80% TLC)	1st	157	1st ppFEF 25/75 (%)
153	ppTLC (%)	Diffusion Impaired (≤80% DLCO)	No Restriction (>80% TLC)	1st	89	1st ppTLC (%)
153	ppDLCO (%)	Diffusion Impaired (≤80% DLCO)	No Restriction (>80% TLC)	1st	78	1st ppDLCO (%)
153	ppFVC (%)	Diffusion Impaired (≤80% DLCO)	No Restriction (>80% TLC)	1st	90	1st ppFVC (%)
153	ppRV (%)	Diffusion Impaired (≤80% DLCO)	No Restriction (>80% TLC)	1st	69	1st ppRV (%)
153	ppFEV1 (%)	Diffusion Impaired (≤80% DLCO)	No Restriction (>80% TLC)	1st	96	1st ppFEV1 (%)
153	ppFEF 25/75 (%)	Diffusion Impaired (≤80% DLCO)	No Restriction (>80% TLC)	1st	128	1st ppFEF 25/75 (%)
153	ppTLC (%)	Diffusion Impaired (≤80% DLCO)	No Restriction (>80% TLC)	2nd	83	2nd ppTLC (%)
153	ppDLCO (%)	Diffusion Impaired (≤80% DLCO)	No Restriction (>80% TLC)	2nd	88	2nd ppDLCO (%)
153	ppFVC (%)	Diffusion Impaired (≤80% DLCO)	No Restriction (>80% TLC)	2nd	73	2nd ppFVC (%)
153	ppRV (%)	Diffusion Impaired (≤80% DLCO)	No Restriction (>80% TLC)	2nd	69	2nd ppRV (%)
153	ppFEV1 (%)	Diffusion Impaired (≤80% DLCO)	No Restriction (>80% TLC)	2nd	90	2nd ppFEV1 (%)
153	ppFEF 25/75 (%)	Diffusion Impaired (≤80% DLCO)	No Restriction (>80% TLC)	2nd	159	2nd ppFEF 25/75 (%)
153	ppTLC (%)	Diffusion Impaired (≤80% DLCO)	No Restriction (>80% TLC)	3rd	78	3rd ppTLC (%)
153	ppDLCO (%)	Diffusion Impaired (≤80% DLCO)	No Restriction (>80% TLC)	3rd	118	3rd ppDLCO (%)
153	ppFVC (%)	Diffusion Impaired (≤80% DLCO)	No Restriction (>80% TLC)	3rd	86	3rd ppFVC (%)
153	ppRV (%)	Diffusion Impaired (≤80% DLCO)	No Restriction (>80% TLC)	3rd	43	3rd ppRV (%)
153	ppFEV1 (%)	Diffusion Impaired (≤80% DLCO)	No Restriction (>80% TLC)	3rd	103	3rd ppFEV1 (%)
153	ppFEF 25/75 (%)	Diffusion Impaired (≤80% DLCO)	No Restriction (>80% TLC)	3rd	124	3rd ppFEF 25/75 (%)
148	ppTLC (%)	Diffusion Impaired (≤80% DLCO)	Moderate Restriction (51-70% TLC)	1st	60	1st ppTLC (%)
148	ppDLCO (%)	Diffusion Impaired (≤80% DLCO)	Moderate Restriction (51-70% TLC)	1st	61	1st ppDLCO (%)
148	ppFVC (%)	Diffusion Impaired (≤80% DLCO)	Moderate Restriction (51-70% TLC)	1st	73	1st ppFVC (%)
148	ppRV (%)	Diffusion Impaired (≤80% DLCO)	Moderate Restriction (51-70% TLC)	1st	34	1st ppRV (%)
148	ppFEV1 (%)	Diffusion Impaired (≤80% DLCO)	Moderate Restriction (51-70% TLC)	1st	81	1st ppFEV1 (%)
148	ppFEF 25/75 (%)	Diffusion Impaired (≤80% DLCO)	Moderate Restriction (51-70% TLC)	1st	116	1st ppFEF 25/75 (%)
154	ppTLC (%)	Diffusion Normal (>80% DLCO)	No Restriction (>80% TLC)	1st	112	1st ppTLC (%)
154	ppDLCO (%)	Diffusion Normal (>80% DLCO)	No Restriction (>80% TLC)	1st	82	1st ppDLCO (%)
154	ppFVC (%)	Diffusion Normal (>80% DLCO)	No Restriction (>80% TLC)	1st	112	1st ppFVC (%)
154	ppRV (%)	Diffusion Normal (>80% DLCO)	No Restriction (>80% TLC)	1st	85	1st ppRV (%)
154	ppFEV1 (%)	Diffusion Normal (>80% DLCO)	No Restriction (>80% TLC)	1st	110	1st ppFEV1 (%)
154	ppFEF 25/75 (%)	Diffusion Normal (>80% DLCO)	No Restriction (>80% TLC)	1st	100	1st ppFEF 25/75 (%)
155	ppTLC (%)	Diffusion Impaired (≤80% DLCO)	Mild Restriction (71-80% TLC)	1st	77	1st ppTLC (%)
155	ppDLCO (%)	Diffusion Impaired (≤80% DLCO)	Mild Restriction (71-80% TLC)	1st	53	1st ppDLCO (%)
155	ppFVC (%)	Diffusion Impaired (≤80% DLCO)	Mild Restriction (71-80% TLC)	1st	79	1st ppFVC (%)
155	ppRV (%)	Diffusion Impaired (≤80% DLCO)	Mild Restriction (71-80% TLC)	1st	87	1st ppRV (%)
155	ppFEV1 (%)	Diffusion Impaired (≤80% DLCO)	Mild Restriction (71-80% TLC)	1st	79	1st ppFEV1 (%)
155	ppFEF 25/75 (%)	Diffusion Impaired (≤80% DLCO)	Mild Restriction (71-80% TLC)	1st	76	1st ppFEF 25/75 (%)
158	ppTLC (%)	Diffusion Normal (>80% DLCO)	Moderate Restriction (51-70% TLC)	1st	66	1st ppTLC (%)
158	ppDLCO (%)	Diffusion Normal (>80% DLCO)	Moderate Restriction (51-70% TLC)	1st	91	1st ppDLCO (%)
158	ppFVC (%)	Diffusion Normal (>80% DLCO)	Moderate Restriction (51-70% TLC)	1st	77	1st ppFVC (%)
158	ppRV (%)	Diffusion Normal (>80% DLCO)	Moderate Restriction (51-70% TLC)	1st	45	1st ppRV (%)
158	ppFEV1 (%)	Diffusion Normal (>80% DLCO)	Moderate Restriction (51-70% TLC)	1st	92	1st ppFEV1 (%)
158	ppFEF 25/75 (%)	Diffusion Normal (>80% DLCO)	Moderate Restriction (51-70% TLC)	1st	153	1st ppFEF 25/75 (%)
159	ppTLC (%)	Diffusion Impaired (≤80% DLCO)	Moderate Restriction (51-70% TLC)	1st	68	1st ppTLC (%)
159	ppDLCO (%)	Diffusion Impaired (≤80% DLCO)	Moderate Restriction (51-70% TLC)	1st	59	1st ppDLCO (%)
159	ppFVC (%)	Diffusion Impaired (≤80% DLCO)	Moderate Restriction (51-70% TLC)	1st	98	1st ppFVC (%)
159	ppRV (%)	Diffusion Impaired (≤80% DLCO)	Moderate Restriction (51-70% TLC)	1st	24	1st ppRV (%)
159	ppFEV1 (%)	Diffusion Impaired (≤80% DLCO)	Moderate Restriction (51-70% TLC)	1st	99	1st ppFEV1 (%)
159	ppFEF 25/75 (%)	Diffusion Impaired (≤80% DLCO)	Moderate Restriction (51-70% TLC)	1st	111	1st ppFEF 25/75 (%)
161	ppTLC (%)	Diffusion Normal (>80% DLCO)	Moderate Restriction (51-70% TLC)	1st	59	1st ppTLC (%)
161	ppDLCO (%)	Diffusion Normal (>80% DLCO)	Moderate Restriction (51-70% TLC)	1st	99	1st ppDLCO (%)
161	ppFVC (%)	Diffusion Normal (>80% DLCO)	Moderate Restriction (51-70% TLC)	1st	77	1st ppFVC (%)
161	ppRV (%)	Diffusion Normal (>80% DLCO)	Moderate Restriction (51-70% TLC)	1st	40	1st ppRV (%)
161	ppFEV1 (%)	Diffusion Normal (>80% DLCO)	Moderate Restriction (51-70% TLC)	1st	76	1st ppFEV1 (%)
161	ppFEF 25/75 (%)	Diffusion Normal (>80% DLCO)	Moderate Restriction (51-70% TLC)	1st	64	1st ppFEF 25/75 (%)
162	ppTLC (%)	Diffusion Impaired (≤80% DLCO)	No Restriction (>80% TLC)	1st	81	1st ppTLC (%)
162	ppDLCO (%)	Diffusion Impaired (≤80% DLCO)	No Restriction (>80% TLC)	1st	59	1st ppDLCO (%)
162	ppFVC (%)	Diffusion Impaired (≤80% DLCO)	No Restriction (>80% TLC)	1st	107	1st ppFVC (%)
162	ppRV (%)	Diffusion Impaired (≤80% DLCO)	No Restriction (>80% TLC)	1st	39	1st ppRV (%)
162	ppFEV1 (%)	Diffusion Impaired (≤80% DLCO)	No Restriction (>80% TLC)	1st	97	1st ppFEV1 (%)
162	ppFEF 25/75 (%)	Diffusion Impaired (≤80% DLCO)	No Restriction (>80% TLC)	1st	77	1st ppFEF 25/75 (%)
162	ppFVC (%)	Diffusion Impaired (≤80% DLCO)	No Restriction (>80% TLC)	2nd	103	2nd ppFVC (%)
162	ppFEV1 (%)	Diffusion Impaired (≤80% DLCO)	No Restriction (>80% TLC)	2nd	105	2nd ppFEV1 (%)
162	ppFEF 25/75 (%)	Diffusion Impaired (≤80% DLCO)	No Restriction (>80% TLC)	2nd	110	2nd ppFEF 25/75 (%)
164	ppTLC (%)	Diffusion Normal (>80% DLCO)	Mild Restriction (71-80% TLC)	1st	80	1st ppTLC (%)
164	ppDLCO (%)	Diffusion Normal (>80% DLCO)	Mild Restriction (71-80% TLC)	1st	86	1st ppDLCO (%)
164	ppFVC (%)	Diffusion Normal (>80% DLCO)	Mild Restriction (71-80% TLC)	1st	91	1st ppFVC (%)
164	ppRV (%)	Diffusion Normal (>80% DLCO)	Mild Restriction (71-80% TLC)	1st	38	1st ppRV (%)
164	ppFEV1 (%)	Diffusion Normal (>80% DLCO)	Mild Restriction (71-80% TLC)	1st	96	1st ppFEV1 (%)
164	ppFEF 25/75 (%)	Diffusion Normal (>80% DLCO)	Mild Restriction (71-80% TLC)	1st	122	1st ppFEF 25/75 (%)
165	ppTLC (%)	Diffusion Impaired (≤80% DLCO)	Severe Restriction (≤50% TLC)	1st	39	1st ppTLC (%)
165	ppDLCO (%)	Diffusion Impaired (≤80% DLCO)	Severe Restriction (≤50% TLC)	1st	48	1st ppDLCO (%)
165	ppFVC (%)	Diffusion Impaired (≤80% DLCO)	Severe Restriction (≤50% TLC)	1st	38	1st ppFVC (%)
165	ppRV (%)	Diffusion Impaired (≤80% DLCO)	Severe Restriction (≤50% TLC)	1st	37	1st ppRV (%)
165	ppFEV1 (%)	Diffusion Impaired (≤80% DLCO)	Severe Restriction (≤50% TLC)	1st	34	1st ppFEV1 (%)
165	ppFEF 25/75 (%)	Diffusion Impaired (≤80% DLCO)	Severe Restriction (≤50% TLC)	1st	19	1st ppFEF 25/75 (%)
166	ppTLC (%)	Diffusion Impaired (≤80% DLCO)	Mild Restriction (71-80% TLC)	1st	77	1st ppTLC (%)
166	ppDLCO (%)	Diffusion Impaired (≤80% DLCO)	Mild Restriction (71-80% TLC)	1st	72	1st ppDLCO (%)
166	ppFVC (%)	Diffusion Impaired (≤80% DLCO)	Mild Restriction (71-80% TLC)	1st	92	1st ppFVC (%)
166	ppRV (%)	Diffusion Impaired (≤80% DLCO)	Mild Restriction (71-80% TLC)	1st	76	1st ppRV (%)
166	ppFEV1 (%)	Diffusion Impaired (≤80% DLCO)	Mild Restriction (71-80% TLC)	1st	87	1st ppFEV1 (%)
166	ppFEF 25/75 (%)	Diffusion Impaired (≤80% DLCO)	Mild Restriction (71-80% TLC)	1st	72	1st ppFEF 25/75 (%)
167	ppTLC (%)	Diffusion Impaired (≤80% DLCO)	Moderate Restriction (51-70% TLC)	1st	62	1st ppTLC (%)
167	ppDLCO (%)	Diffusion Impaired (≤80% DLCO)	Moderate Restriction (51-70% TLC)	1st	46	1st ppDLCO (%)
167	ppFVC (%)	Diffusion Impaired (≤80% DLCO)	Moderate Restriction (51-70% TLC)	1st	67	1st ppFVC (%)
167	ppRV (%)	Diffusion Impaired (≤80% DLCO)	Moderate Restriction (51-70% TLC)	1st	41	1st ppRV (%)
167	ppFEV1 (%)	Diffusion Impaired (≤80% DLCO)	Moderate Restriction (51-70% TLC)	1st	67	1st ppFEV1 (%)
167	ppFEF 25/75 (%)	Diffusion Impaired (≤80% DLCO)	Moderate Restriction (51-70% TLC)	1st	69	1st ppFEF 25/75 (%)
167	ppTLC (%)	Diffusion Impaired (≤80% DLCO)	Moderate Restriction (51-70% TLC)	2nd	90	2nd ppTLC (%)
167	ppDLCO (%)	Diffusion Impaired (≤80% DLCO)	Moderate Restriction (51-70% TLC)	2nd	67	2nd ppDLCO (%)
167	ppFVC (%)	Diffusion Impaired (≤80% DLCO)	Moderate Restriction (51-70% TLC)	2nd	96	2nd ppFVC (%)
167	ppRV (%)	Diffusion Impaired (≤80% DLCO)	Moderate Restriction (51-70% TLC)	2nd	58	2nd ppRV (%)
167	ppFEV1 (%)	Diffusion Impaired (≤80% DLCO)	Moderate Restriction (51-70% TLC)	2nd	100	2nd ppFEV1 (%)
167	ppFEF 25/75 (%)	Diffusion Impaired (≤80% DLCO)	Moderate Restriction (51-70% TLC)	2nd	137	2nd ppFEF 25/75 (%)
168	ppTLC (%)	Diffusion Impaired (≤80% DLCO)	Severe Restriction (≤50% TLC)	1st	49	1st ppTLC (%)
168	ppDLCO (%)	Diffusion Impaired (≤80% DLCO)	Severe Restriction (≤50% TLC)	1st	34	1st ppDLCO (%)
168	ppFVC (%)	Diffusion Impaired (≤80% DLCO)	Severe Restriction (≤50% TLC)	1st	53	1st ppFVC (%)
168	ppRV (%)	Diffusion Impaired (≤80% DLCO)	Severe Restriction (≤50% TLC)	1st	38	1st ppRV (%)
168	ppFEV1 (%)	Diffusion Impaired (≤80% DLCO)	Severe Restriction (≤50% TLC)	1st	57	1st ppFEV1 (%)
168	ppFEF 25/75 (%)	Diffusion Impaired (≤80% DLCO)	Severe Restriction (≤50% TLC)	1st	73	1st ppFEF 25/75 (%)
168	ppTLC (%)	Diffusion Impaired (≤80% DLCO)	Severe Restriction (≤50% TLC)	2nd	48	2nd ppTLC (%)
168	ppDLCO (%)	Diffusion Impaired (≤80% DLCO)	Severe Restriction (≤50% TLC)	2nd	45	2nd ppDLCO (%)
168	ppFVC (%)	Diffusion Impaired (≤80% DLCO)	Severe Restriction (≤50% TLC)	2nd	56	2nd ppFVC (%)
168	ppRV (%)	Diffusion Impaired (≤80% DLCO)	Severe Restriction (≤50% TLC)	2nd	27	2nd ppRV (%)
168	ppFEV1 (%)	Diffusion Impaired (≤80% DLCO)	Severe Restriction (≤50% TLC)	2nd	61	2nd ppFEV1 (%)
168	ppFEF 25/75 (%)	Diffusion Impaired (≤80% DLCO)	Severe Restriction (≤50% TLC)	2nd	102	2nd ppFEF 25/75 (%)
170	ppTLC (%)	Diffusion Impaired (≤80% DLCO)	Moderate Restriction (51-70% TLC)	1st	69	1st ppTLC (%)
170	ppDLCO (%)	Diffusion Impaired (≤80% DLCO)	Moderate Restriction (51-70% TLC)	1st	46	1st ppDLCO (%)
170	ppFVC (%)	Diffusion Impaired (≤80% DLCO)	Moderate Restriction (51-70% TLC)	1st	77	1st ppFVC (%)
170	ppRV (%)	Diffusion Impaired (≤80% DLCO)	Moderate Restriction (51-70% TLC)	1st	48	1st ppRV (%)
170	ppFEV1 (%)	Diffusion Impaired (≤80% DLCO)	Moderate Restriction (51-70% TLC)	1st	56	1st ppFEV1 (%)
170	ppFEF 25/75 (%)	Diffusion Impaired (≤80% DLCO)	Moderate Restriction (51-70% TLC)	1st	25	1st ppFEF 25/75 (%)
170	ppTLC (%)	Diffusion Impaired (≤80% DLCO)	Moderate Restriction (51-70% TLC)	2nd	69	2nd ppTLC (%)
170	ppDLCO (%)	Diffusion Impaired (≤80% DLCO)	Moderate Restriction (51-70% TLC)	2nd	58	2nd ppDLCO (%)
170	ppFVC (%)	Diffusion Impaired (≤80% DLCO)	Moderate Restriction (51-70% TLC)	2nd	77	2nd ppFVC (%)
170	ppRV (%)	Diffusion Impaired (≤80% DLCO)	Moderate Restriction (51-70% TLC)	2nd	42	2nd ppRV (%)
170	ppFEV1 (%)	Diffusion Impaired (≤80% DLCO)	Moderate Restriction (51-70% TLC)	2nd	63	2nd ppFEV1 (%)
170	ppFEF 25/75 (%)	Diffusion Impaired (≤80% DLCO)	Moderate Restriction (51-70% TLC)	2nd	36	2nd ppFEF 25/75 (%)
171	ppTLC (%)	Diffusion Impaired (≤80% DLCO)	Moderate Restriction (51-70% TLC)	1st	52	1st ppTLC (%)
171	ppDLCO (%)	Diffusion Impaired (≤80% DLCO)	Moderate Restriction (51-70% TLC)	1st	66	1st ppDLCO (%)
171	ppFVC (%)	Diffusion Impaired (≤80% DLCO)	Moderate Restriction (51-70% TLC)	1st	71	1st ppFVC (%)
171	ppRV (%)	Diffusion Impaired (≤80% DLCO)	Moderate Restriction (51-70% TLC)	1st	17	1st ppRV (%)
171	ppFEV1 (%)	Diffusion Impaired (≤80% DLCO)	Moderate Restriction (51-70% TLC)	1st	71	1st ppFEV1 (%)
171	ppFEF 25/75 (%)	Diffusion Impaired (≤80% DLCO)	Moderate Restriction (51-70% TLC)	1st	82	1st ppFEF 25/75 (%)
172	ppTLC (%)	Diffusion Impaired (≤80% DLCO)	Moderate Restriction (51-70% TLC)	1st	66	1st ppTLC (%)
172	ppDLCO (%)	Diffusion Impaired (≤80% DLCO)	Moderate Restriction (51-70% TLC)	1st	48	1st ppDLCO (%)
172	ppFVC (%)	Diffusion Impaired (≤80% DLCO)	Moderate Restriction (51-70% TLC)	1st	87	1st ppFVC (%)
172	ppRV (%)	Diffusion Impaired (≤80% DLCO)	Moderate Restriction (51-70% TLC)	1st	32	1st ppRV (%)
172	ppFEV1 (%)	Diffusion Impaired (≤80% DLCO)	Moderate Restriction (51-70% TLC)	1st	89	1st ppFEV1 (%)
172	ppFEF 25/75 (%)	Diffusion Impaired (≤80% DLCO)	Moderate Restriction (51-70% TLC)	1st	91	1st ppFEF 25/75 (%)
172	ppTLC (%)	Diffusion Impaired (≤80% DLCO)	Moderate Restriction (51-70% TLC)	2nd	73	2nd ppTLC (%)
172	ppDLCO (%)	Diffusion Impaired (≤80% DLCO)	Moderate Restriction (51-70% TLC)	2nd	76	2nd ppDLCO (%)
172	ppFVC (%)	Diffusion Impaired (≤80% DLCO)	Moderate Restriction (51-70% TLC)	2nd	80	2nd ppFVC (%)
172	ppRV (%)	Diffusion Impaired (≤80% DLCO)	Moderate Restriction (51-70% TLC)	2nd	64	2nd ppRV (%)
172	ppFEV1 (%)	Diffusion Impaired (≤80% DLCO)	Moderate Restriction (51-70% TLC)	2nd	81	2nd ppFEV1 (%)
172	ppFEF 25/75 (%)	Diffusion Impaired (≤80% DLCO)	Moderate Restriction (51-70% TLC)	2nd	93	2nd ppFEF 25/75 (%)
173	ppTLC (%)	Diffusion Impaired (≤80% DLCO)	Severe Restriction (≤50% TLC)	1st	39	1st ppTLC (%)
173	ppDLCO (%)	Diffusion Impaired (≤80% DLCO)	Severe Restriction (≤50% TLC)	1st	44	1st ppDLCO (%)
173	ppFVC (%)	Diffusion Impaired (≤80% DLCO)	Severe Restriction (≤50% TLC)	1st	49	1st ppFVC (%)
173	ppRV (%)	Diffusion Impaired (≤80% DLCO)	Severe Restriction (≤50% TLC)	1st	29	1st ppRV (%)
173	ppFEV1 (%)	Diffusion Impaired (≤80% DLCO)	Severe Restriction (≤50% TLC)	1st	53	1st ppFEV1 (%)
173	ppFEF 25/75 (%)	Diffusion Impaired (≤80% DLCO)	Severe Restriction (≤50% TLC)	1st	115	1st ppFEF 25/75 (%)
173	ppDLCO (%)	Diffusion Impaired (≤80% DLCO)	Severe Restriction (≤50% TLC)	2nd	45	2nd ppDLCO (%)
173	ppFVC (%)	Diffusion Impaired (≤80% DLCO)	Severe Restriction (≤50% TLC)	2nd	55	2nd ppFVC (%)
173	ppFEV1 (%)	Diffusion Impaired (≤80% DLCO)	Severe Restriction (≤50% TLC)	2nd	60	2nd ppFEV1 (%)
173	ppFEF 25/75 (%)	Diffusion Impaired (≤80% DLCO)	Severe Restriction (≤50% TLC)	2nd	106	2nd ppFEF 25/75 (%)
173	ppTLC (%)	Diffusion Impaired (≤80% DLCO)	Severe Restriction (≤50% TLC)	3rd	42	3rd ppTLC (%)
173	ppDLCO (%)	Diffusion Impaired (≤80% DLCO)	Severe Restriction (≤50% TLC)	3rd	71	3rd ppDLCO (%)
173	ppFVC (%)	Diffusion Impaired (≤80% DLCO)	Severe Restriction (≤50% TLC)	3rd	57	3rd ppFVC (%)
173	ppRV (%)	Diffusion Impaired (≤80% DLCO)	Severe Restriction (≤50% TLC)	3rd	26	3rd ppRV (%)
173	ppFEV1 (%)	Diffusion Impaired (≤80% DLCO)	Severe Restriction (≤50% TLC)	3rd	60	3rd ppFEV1 (%)
173	ppFEF 25/75 (%)	Diffusion Impaired (≤80% DLCO)	Severe Restriction (≤50% TLC)	3rd	127	3rd ppFEF 25/75 (%)
175	ppTLC (%)	Diffusion Normal (>80% DLCO)	No Restriction (>80% TLC)	1st	85	1st ppTLC (%)
175	ppDLCO (%)	Diffusion Normal (>80% DLCO)	No Restriction (>80% TLC)	1st	106	1st ppDLCO (%)
175	ppFVC (%)	Diffusion Normal (>80% DLCO)	No Restriction (>80% TLC)	1st	89	1st ppFVC (%)
175	ppRV (%)	Diffusion Normal (>80% DLCO)	No Restriction (>80% TLC)	1st	57	1st ppRV (%)
175	ppFEV1 (%)	Diffusion Normal (>80% DLCO)	No Restriction (>80% TLC)	1st	96	1st ppFEV1 (%)
175	ppFEF 25/75 (%)	Diffusion Normal (>80% DLCO)	No Restriction (>80% TLC)	1st	97	1st ppFEF 25/75 (%)
176	ppTLC (%)	Diffusion Impaired (≤80% DLCO)	Moderate Restriction (51-70% TLC)	1st	56	1st ppTLC (%)
176	ppDLCO (%)	Diffusion Impaired (≤80% DLCO)	Moderate Restriction (51-70% TLC)	1st	79	1st ppDLCO (%)
176	ppFVC (%)	Diffusion Impaired (≤80% DLCO)	Moderate Restriction (51-70% TLC)	1st	75	1st ppFVC (%)
176	ppRV (%)	Diffusion Impaired (≤80% DLCO)	Moderate Restriction (51-70% TLC)	1st	29	1st ppRV (%)
176	ppFEV1 (%)	Diffusion Impaired (≤80% DLCO)	Moderate Restriction (51-70% TLC)	1st	70	1st ppFEV1 (%)
176	ppFEF 25/75 (%)	Diffusion Impaired (≤80% DLCO)	Moderate Restriction (51-70% TLC)	1st	62	1st ppFEF 25/75 (%)
177	ppTLC (%)	Diffusion Impaired (≤80% DLCO)	Moderate Restriction (51-70% TLC)	1st	64	1st ppTLC (%)
177	ppDLCO (%)	Diffusion Impaired (≤80% DLCO)	Moderate Restriction (51-70% TLC)	1st	71	1st ppDLCO (%)
177	ppFVC (%)	Diffusion Impaired (≤80% DLCO)	Moderate Restriction (51-70% TLC)	1st	97	1st ppFVC (%)
177	ppRV (%)	Diffusion Impaired (≤80% DLCO)	Moderate Restriction (51-70% TLC)	1st	51	1st ppRV (%)
177	ppFEV1 (%)	Diffusion Impaired (≤80% DLCO)	Moderate Restriction (51-70% TLC)	1st	120	1st ppFEV1 (%)
177	ppFEF 25/75 (%)	Diffusion Impaired (≤80% DLCO)	Moderate Restriction (51-70% TLC)	1st	210	1st ppFEF 25/75 (%)
178	ppTLC (%)	Diffusion Impaired (≤80% DLCO)	Mild Restriction (71-80% TLC)	1st	75	1st ppTLC (%)
178	ppDLCO (%)	Diffusion Impaired (≤80% DLCO)	Mild Restriction (71-80% TLC)	1st	55	1st ppDLCO (%)
178	ppFVC (%)	Diffusion Impaired (≤80% DLCO)	Mild Restriction (71-80% TLC)	1st	70	1st ppFVC (%)
178	ppRV (%)	Diffusion Impaired (≤80% DLCO)	Mild Restriction (71-80% TLC)	1st	67	1st ppRV (%)
178	ppFEV1 (%)	Diffusion Impaired (≤80% DLCO)	Mild Restriction (71-80% TLC)	1st	56	1st ppFEV1 (%)
178	ppFEF 25/75 (%)	Diffusion Impaired (≤80% DLCO)	Mild Restriction (71-80% TLC)	1st	34	1st ppFEF 25/75 (%)
178	ppTLC (%)	Diffusion Impaired (≤80% DLCO)	Mild Restriction (71-80% TLC)	2nd	86	2nd ppTLC (%)
178	ppDLCO (%)	Diffusion Impaired (≤80% DLCO)	Mild Restriction (71-80% TLC)	2nd	86	2nd ppDLCO (%)
178	ppFVC (%)	Diffusion Impaired (≤80% DLCO)	Mild Restriction (71-80% TLC)	2nd	92	2nd ppFVC (%)
178	ppRV (%)	Diffusion Impaired (≤80% DLCO)	Mild Restriction (71-80% TLC)	2nd	54	2nd ppRV (%)
178	ppFEV1 (%)	Diffusion Impaired (≤80% DLCO)	Mild Restriction (71-80% TLC)	2nd	93	2nd ppFEV1 (%)
178	ppFEF 25/75 (%)	Diffusion Impaired (≤80% DLCO)	Mild Restriction (71-80% TLC)	2nd	90	2nd ppFEF 25/75 (%)
178	ppTLC (%)	Diffusion Impaired (≤80% DLCO)	Mild Restriction (71-80% TLC)	3rd	74	3rd ppTLC (%)
178	ppDLCO (%)	Diffusion Impaired (≤80% DLCO)	Mild Restriction (71-80% TLC)	3rd	74	3rd ppDLCO (%)
178	ppFVC (%)	Diffusion Impaired (≤80% DLCO)	Mild Restriction (71-80% TLC)	3rd	84	3rd ppFVC (%)
178	ppRV (%)	Diffusion Impaired (≤80% DLCO)	Mild Restriction (71-80% TLC)	3rd	40	3rd ppRV (%)
178	ppFEV1 (%)	Diffusion Impaired (≤80% DLCO)	Mild Restriction (71-80% TLC)	3rd	85	3rd ppFEV1 (%)
178	ppFEF 25/75 (%)	Diffusion Impaired (≤80% DLCO)	Mild Restriction (71-80% TLC)	3rd	85	3rd ppFEF 25/75 (%)
179	ppTLC (%)	Diffusion Normal (>80% DLCO)	No Restriction (>80% TLC)	1st	89	1st ppTLC (%)
179	ppDLCO (%)	Diffusion Normal (>80% DLCO)	No Restriction (>80% TLC)	1st	101	1st ppDLCO (%)
179	ppFVC (%)	Diffusion Normal (>80% DLCO)	No Restriction (>80% TLC)	1st	88	1st ppFVC (%)
179	ppRV (%)	Diffusion Normal (>80% DLCO)	No Restriction (>80% TLC)	1st	75	1st ppRV (%)
179	ppFEV1 (%)	Diffusion Normal (>80% DLCO)	No Restriction (>80% TLC)	1st	87	1st ppFEV1 (%)
179	ppFEF 25/75 (%)	Diffusion Normal (>80% DLCO)	No Restriction (>80% TLC)	1st	89	1st ppFEF 25/75 (%)
180	ppTLC (%)	Diffusion Normal (>80% DLCO)	Mild Restriction (71-80% TLC)	1st	76	1st ppTLC (%)
180	ppDLCO (%)	Diffusion Normal (>80% DLCO)	Mild Restriction (71-80% TLC)	1st	94	1st ppDLCO (%)
180	ppFVC (%)	Diffusion Normal (>80% DLCO)	Mild Restriction (71-80% TLC)	1st	90	1st ppFVC (%)
180	ppRV (%)	Diffusion Normal (>80% DLCO)	Mild Restriction (71-80% TLC)	1st	45	1st ppRV (%)
180	ppFEV1 (%)	Diffusion Normal (>80% DLCO)	Mild Restriction (71-80% TLC)	1st	92	1st ppFEV1 (%)
180	ppFEF 25/75 (%)	Diffusion Normal (>80% DLCO)	Mild Restriction (71-80% TLC)	1st	94	1st ppFEF 25/75 (%)
184	ppTLC (%)	Diffusion Impaired (≤80% DLCO)	Severe Restriction (≤50% TLC)	1st	47	1st ppTLC (%)
184	ppDLCO (%)	Diffusion Impaired (≤80% DLCO)	Severe Restriction (≤50% TLC)	1st	37	1st ppDLCO (%)
184	ppFVC (%)	Diffusion Impaired (≤80% DLCO)	Severe Restriction (≤50% TLC)	1st	66	1st ppFVC (%)
184	ppRV (%)	Diffusion Impaired (≤80% DLCO)	Severe Restriction (≤50% TLC)	1st	5	1st ppRV (%)
184	ppFEV1 (%)	Diffusion Impaired (≤80% DLCO)	Severe Restriction (≤50% TLC)	1st	62	1st ppFEV1 (%)
184	ppFEF 25/75 (%)	Diffusion Impaired (≤80% DLCO)	Severe Restriction (≤50% TLC)	1st	45	1st ppFEF 25/75 (%)
184	ppTLC (%)	Diffusion Impaired (≤80% DLCO)	Severe Restriction (≤50% TLC)	2nd	77	2nd ppTLC (%)
184	ppDLCO (%)	Diffusion Impaired (≤80% DLCO)	Severe Restriction (≤50% TLC)	2nd	54	2nd ppDLCO (%)
184	ppFVC (%)	Diffusion Impaired (≤80% DLCO)	Severe Restriction (≤50% TLC)	2nd	86	2nd ppFVC (%)
184	ppRV (%)	Diffusion Impaired (≤80% DLCO)	Severe Restriction (≤50% TLC)	2nd	43	2nd ppRV (%)
184	ppFEV1 (%)	Diffusion Impaired (≤80% DLCO)	Severe Restriction (≤50% TLC)	2nd	82	2nd ppFEV1 (%)
184	ppFEF 25/75 (%)	Diffusion Impaired (≤80% DLCO)	Severe Restriction (≤50% TLC)	2nd	64	2nd ppFEF 25/75 (%)
185	ppTLC (%)	Diffusion Impaired (≤80% DLCO)	Moderate Restriction (51-70% TLC)	1st	54	1st ppTLC (%)
185	ppDLCO (%)	Diffusion Impaired (≤80% DLCO)	Moderate Restriction (51-70% TLC)	1st	48	1st ppDLCO (%)
185	ppFVC (%)	Diffusion Impaired (≤80% DLCO)	Moderate Restriction (51-70% TLC)	1st	68	1st ppFVC (%)
185	ppRV (%)	Diffusion Impaired (≤80% DLCO)	Moderate Restriction (51-70% TLC)	1st	43	1st ppRV (%)
185	ppFEV1 (%)	Diffusion Impaired (≤80% DLCO)	Moderate Restriction (51-70% TLC)	1st	80	1st ppFEV1 (%)
185	ppFEF 25/75 (%)	Diffusion Impaired (≤80% DLCO)	Moderate Restriction (51-70% TLC)	1st	128	1st ppFEF 25/75 (%)
185	ppTLC (%)	Diffusion Impaired (≤80% DLCO)	Moderate Restriction (51-70% TLC)	2nd	55	2nd ppTLC (%)
185	ppDLCO (%)	Diffusion Impaired (≤80% DLCO)	Moderate Restriction (51-70% TLC)	2nd	64	2nd ppDLCO (%)
185	ppFVC (%)	Diffusion Impaired (≤80% DLCO)	Moderate Restriction (51-70% TLC)	2nd	77	2nd ppFVC (%)
185	ppRV (%)	Diffusion Impaired (≤80% DLCO)	Moderate Restriction (51-70% TLC)	2nd	32	2nd ppRV (%)
185	ppFEV1 (%)	Diffusion Impaired (≤80% DLCO)	Moderate Restriction (51-70% TLC)	2nd	84	2nd ppFEV1 (%)
185	ppFEF 25/75 (%)	Diffusion Impaired (≤80% DLCO)	Moderate Restriction (51-70% TLC)	2nd	116	2nd ppFEF 25/75 (%)
185	ppTLC (%)	Diffusion Impaired (≤80% DLCO)	Moderate Restriction (51-70% TLC)	3rd	57	3rd ppTLC (%)
185	ppDLCO (%)	Diffusion Impaired (≤80% DLCO)	Moderate Restriction (51-70% TLC)	3rd	65	3rd ppDLCO (%)
185	ppFVC (%)	Diffusion Impaired (≤80% DLCO)	Moderate Restriction (51-70% TLC)	3rd	82	3rd ppFVC (%)
185	ppRV (%)	Diffusion Impaired (≤80% DLCO)	Moderate Restriction (51-70% TLC)	3rd	32	3rd ppRV (%)
185	ppFEV1 (%)	Diffusion Impaired (≤80% DLCO)	Moderate Restriction (51-70% TLC)	3rd	87	3rd ppFEV1 (%)
185	ppFEF 25/75 (%)	Diffusion Impaired (≤80% DLCO)	Moderate Restriction (51-70% TLC)	3rd	109	3rd ppFEF 25/75 (%)
186	ppTLC (%)	Diffusion Normal (>80% DLCO)	No Restriction (>80% TLC)	1st	90	1st ppTLC (%)
186	ppDLCO (%)	Diffusion Normal (>80% DLCO)	No Restriction (>80% TLC)	1st	109	1st ppDLCO (%)
186	ppFVC (%)	Diffusion Normal (>80% DLCO)	No Restriction (>80% TLC)	1st	77	1st ppFVC (%)
186	ppRV (%)	Diffusion Normal (>80% DLCO)	No Restriction (>80% TLC)	1st	100	1st ppRV (%)
186	ppFEV1 (%)	Diffusion Normal (>80% DLCO)	No Restriction (>80% TLC)	1st	88	1st ppFEV1 (%)
186	ppFEF 25/75 (%)	Diffusion Normal (>80% DLCO)	No Restriction (>80% TLC)	1st	117	1st ppFEF 25/75 (%)
187	ppTLC (%)	Diffusion Impaired (≤80% DLCO)	Moderate Restriction (51-70% TLC)	1st	62	1st ppTLC (%)
187	ppDLCO (%)	Diffusion Impaired (≤80% DLCO)	Moderate Restriction (51-70% TLC)	1st	69	1st ppDLCO (%)
187	ppFVC (%)	Diffusion Impaired (≤80% DLCO)	Moderate Restriction (51-70% TLC)	1st	77	1st ppFVC (%)
187	ppRV (%)	Diffusion Impaired (≤80% DLCO)	Moderate Restriction (51-70% TLC)	1st	45	1st ppRV (%)
187	ppFEV1 (%)	Diffusion Impaired (≤80% DLCO)	Moderate Restriction (51-70% TLC)	1st	78	1st ppFEV1 (%)
187	ppFEF 25/75 (%)	Diffusion Impaired (≤80% DLCO)	Moderate Restriction (51-70% TLC)	1st	92	1st ppFEF 25/75 (%)
188	ppTLC (%)	Diffusion Impaired (≤80% DLCO)	No Restriction (>80% TLC)	1st	83	1st ppTLC (%)
188	ppDLCO (%)	Diffusion Impaired (≤80% DLCO)	No Restriction (>80% TLC)	1st	56	1st ppDLCO (%)
188	ppFVC (%)	Diffusion Impaired (≤80% DLCO)	No Restriction (>80% TLC)	1st	91	1st ppFVC (%)
188	ppRV (%)	Diffusion Impaired (≤80% DLCO)	No Restriction (>80% TLC)	1st	86	1st ppRV (%)
188	ppFEV1 (%)	Diffusion Impaired (≤80% DLCO)	No Restriction (>80% TLC)	1st	88	1st ppFEV1 (%)
188	ppFEF 25/75 (%)	Diffusion Impaired (≤80% DLCO)	No Restriction (>80% TLC)	1st	91	1st ppFEF 25/75 (%)
190	ppTLC (%)	Diffusion Impaired (≤80% DLCO)	Mild Restriction (71-80% TLC)	1st	72	1st ppTLC (%)
190	ppDLCO (%)	Diffusion Impaired (≤80% DLCO)	Mild Restriction (71-80% TLC)	1st	36	1st ppDLCO (%)
190	ppFVC (%)	Diffusion Impaired (≤80% DLCO)	Mild Restriction (71-80% TLC)	1st	65	1st ppFVC (%)
190	ppRV (%)	Diffusion Impaired (≤80% DLCO)	Mild Restriction (71-80% TLC)	1st	65	1st ppRV (%)
190	ppFEV1 (%)	Diffusion Impaired (≤80% DLCO)	Mild Restriction (71-80% TLC)	1st	63	1st ppFEV1 (%)
190	ppFEF 25/75 (%)	Diffusion Impaired (≤80% DLCO)	Mild Restriction (71-80% TLC)	1st	58	1st ppFEF 25/75 (%)
190	ppTLC (%)	Diffusion Impaired (≤80% DLCO)	Mild Restriction (71-80% TLC)	2nd	85	2nd ppTLC (%)
190	ppDLCO (%)	Diffusion Impaired (≤80% DLCO)	Mild Restriction (71-80% TLC)	2nd	48	2nd ppDLCO (%)
190	ppFVC (%)	Diffusion Impaired (≤80% DLCO)	Mild Restriction (71-80% TLC)	2nd	94	2nd ppFVC (%)
190	ppRV (%)	Diffusion Impaired (≤80% DLCO)	Mild Restriction (71-80% TLC)	2nd	66	2nd ppRV (%)
190	ppFEV1 (%)	Diffusion Impaired (≤80% DLCO)	Mild Restriction (71-80% TLC)	2nd	83	2nd ppFEV1 (%)
190	ppFEF 25/75 (%)	Diffusion Impaired (≤80% DLCO)	Mild Restriction (71-80% TLC)	2nd	49	2nd ppFEF 25/75 (%)
192	ppTLC (%)	Diffusion Normal (>80% DLCO)	Moderate Restriction (51-70% TLC)	1st	65	1st ppTLC (%)
192	ppDLCO (%)	Diffusion Normal (>80% DLCO)	Moderate Restriction (51-70% TLC)	1st	103	1st ppDLCO (%)
192	ppFVC (%)	Diffusion Normal (>80% DLCO)	Moderate Restriction (51-70% TLC)	1st	79	1st ppFVC (%)
192	ppRV (%)	Diffusion Normal (>80% DLCO)	Moderate Restriction (51-70% TLC)	1st	36	1st ppRV (%)
192	ppFEV1 (%)	Diffusion Normal (>80% DLCO)	Moderate Restriction (51-70% TLC)	1st	85	1st ppFEV1 (%)
192	ppFEF 25/75 (%)	Diffusion Normal (>80% DLCO)	Moderate Restriction (51-70% TLC)	1st	130	1st ppFEF 25/75 (%)
192	ppTLC (%)	Diffusion Normal (>80% DLCO)	Moderate Restriction (51-70% TLC)	2nd	84	2nd ppTLC (%)
192	ppDLCO (%)	Diffusion Normal (>80% DLCO)	Moderate Restriction (51-70% TLC)	2nd	108	2nd ppDLCO (%)
192	ppFVC (%)	Diffusion Normal (>80% DLCO)	Moderate Restriction (51-70% TLC)	2nd	92	2nd ppFVC (%)
192	ppRV (%)	Diffusion Normal (>80% DLCO)	Moderate Restriction (51-70% TLC)	2nd	81	2nd ppRV (%)
192	ppFEV1 (%)	Diffusion Normal (>80% DLCO)	Moderate Restriction (51-70% TLC)	2nd	101	2nd ppFEV1 (%)
192	ppFEF 25/75 (%)	Diffusion Normal (>80% DLCO)	Moderate Restriction (51-70% TLC)	2nd	160	2nd ppFEF 25/75 (%)
193	ppTLC (%)	Diffusion Impaired (≤80% DLCO)	No Restriction (>80% TLC)	1st	81	1st ppTLC (%)
193	ppDLCO (%)	Diffusion Impaired (≤80% DLCO)	No Restriction (>80% TLC)	1st	80	1st ppDLCO (%)
193	ppFVC (%)	Diffusion Impaired (≤80% DLCO)	No Restriction (>80% TLC)	1st	101	1st ppFVC (%)
193	ppRV (%)	Diffusion Impaired (≤80% DLCO)	No Restriction (>80% TLC)	1st	51	1st ppRV (%)
193	ppFEV1 (%)	Diffusion Impaired (≤80% DLCO)	No Restriction (>80% TLC)	1st	106	1st ppFEV1 (%)
193	ppFEF 25/75 (%)	Diffusion Impaired (≤80% DLCO)	No Restriction (>80% TLC)	1st	130	1st ppFEF 25/75 (%)
194	ppTLC (%)	Diffusion Impaired (≤80% DLCO)	Moderate Restriction (51-70% TLC)	1st	61	1st ppTLC (%)
194	ppDLCO (%)	Diffusion Impaired (≤80% DLCO)	Moderate Restriction (51-70% TLC)	1st	71	1st ppDLCO (%)
194	ppFVC (%)	Diffusion Impaired (≤80% DLCO)	Moderate Restriction (51-70% TLC)	1st	74	1st ppFVC (%)
194	ppRV (%)	Diffusion Impaired (≤80% DLCO)	Moderate Restriction (51-70% TLC)	1st	29	1st ppRV (%)
194	ppFEV1 (%)	Diffusion Impaired (≤80% DLCO)	Moderate Restriction (51-70% TLC)	1st	75	1st ppFEV1 (%)
194	ppFEF 25/75 (%)	Diffusion Impaired (≤80% DLCO)	Moderate Restriction (51-70% TLC)	1st	89	1st ppFEF 25/75 (%)
195	ppTLC (%)	Diffusion Normal (>80% DLCO)	No Restriction (>80% TLC)	1st	98	1st ppTLC (%)
195	ppDLCO (%)	Diffusion Normal (>80% DLCO)	No Restriction (>80% TLC)	1st	101	1st ppDLCO (%)
195	ppFVC (%)	Diffusion Normal (>80% DLCO)	No Restriction (>80% TLC)	1st	116	1st ppFVC (%)
195	ppRV (%)	Diffusion Normal (>80% DLCO)	No Restriction (>80% TLC)	1st	37	1st ppRV (%)
195	ppFEV1 (%)	Diffusion Normal (>80% DLCO)	No Restriction (>80% TLC)	1st	102	1st ppFEV1 (%)
195	ppFEF 25/75 (%)	Diffusion Normal (>80% DLCO)	No Restriction (>80% TLC)	1st	71	1st ppFEF 25/75 (%)
196	ppTLC (%)	Diffusion Impaired (≤80% DLCO)	No Restriction (>80% TLC)	1st	81	1st ppTLC (%)
196	ppDLCO (%)	Diffusion Impaired (≤80% DLCO)	No Restriction (>80% TLC)	1st	70	1st ppDLCO (%)
196	ppFVC (%)	Diffusion Impaired (≤80% DLCO)	No Restriction (>80% TLC)	1st	93	1st ppFVC (%)
196	ppRV (%)	Diffusion Impaired (≤80% DLCO)	No Restriction (>80% TLC)	1st	36	1st ppRV (%)
196	ppFEV1 (%)	Diffusion Impaired (≤80% DLCO)	No Restriction (>80% TLC)	1st	91	1st ppFEV1 (%)
196	ppFEF 25/75 (%)	Diffusion Impaired (≤80% DLCO)	No Restriction (>80% TLC)	1st	92	1st ppFEF 25/75 (%)
197	ppTLC (%)	Diffusion Impaired (≤80% DLCO)	Mild Restriction (71-80% TLC)	1st	74	1st ppTLC (%)
197	ppDLCO (%)	Diffusion Impaired (≤80% DLCO)	Mild Restriction (71-80% TLC)	1st	70	1st ppDLCO (%)
197	ppFVC (%)	Diffusion Impaired (≤80% DLCO)	Mild Restriction (71-80% TLC)	1st	71	1st ppFVC (%)
197	ppRV (%)	Diffusion Impaired (≤80% DLCO)	Mild Restriction (71-80% TLC)	1st	64	1st ppRV (%)
197	ppFEV1 (%)	Diffusion Impaired (≤80% DLCO)	Mild Restriction (71-80% TLC)	1st	76	1st ppFEV1 (%)
197	ppFEF 25/75 (%)	Diffusion Impaired (≤80% DLCO)	Mild Restriction (71-80% TLC)	1st	93	1st ppFEF 25/75 (%)
198	ppTLC (%)	Diffusion Impaired (≤80% DLCO)	Moderate Restriction (51-70% TLC)	1st	63	1st ppTLC (%)
198	ppDLCO (%)	Diffusion Impaired (≤80% DLCO)	Moderate Restriction (51-70% TLC)	1st	40	1st ppDLCO (%)
198	ppFVC (%)	Diffusion Impaired (≤80% DLCO)	Moderate Restriction (51-70% TLC)	1st	60	1st ppFVC (%)
198	ppRV (%)	Diffusion Impaired (≤80% DLCO)	Moderate Restriction (51-70% TLC)	1st	81	1st ppRV (%)
198	ppFEV1 (%)	Diffusion Impaired (≤80% DLCO)	Moderate Restriction (51-70% TLC)	1st	58	1st ppFEV1 (%)
198	ppFEF 25/75 (%)	Diffusion Impaired (≤80% DLCO)	Moderate Restriction (51-70% TLC)	1st	48	1st ppFEF 25/75 (%)
198	ppDLCO (%)	Diffusion Impaired (≤80% DLCO)	Moderate Restriction (51-70% TLC)	2nd	38	2nd ppDLCO (%)
198	ppFVC (%)	Diffusion Impaired (≤80% DLCO)	Moderate Restriction (51-70% TLC)	2nd	67	2nd ppFVC (%)
198	ppFEV1 (%)	Diffusion Impaired (≤80% DLCO)	Moderate Restriction (51-70% TLC)	2nd	60	2nd ppFEV1 (%)
198	ppFEF 25/75 (%)	Diffusion Impaired (≤80% DLCO)	Moderate Restriction (51-70% TLC)	2nd	47	2nd ppFEF 25/75 (%)
198	ppDLCO (%)	Diffusion Impaired (≤80% DLCO)	Moderate Restriction (51-70% TLC)	3rd	38	3rd ppDLCO (%)
198	ppFVC (%)	Diffusion Impaired (≤80% DLCO)	Moderate Restriction (51-70% TLC)	3rd	62	3rd ppFVC (%)
198	ppFEV1 (%)	Diffusion Impaired (≤80% DLCO)	Moderate Restriction (51-70% TLC)	3rd	55	3rd ppFEV1 (%)
198	ppFEF 25/75 (%)	Diffusion Impaired (≤80% DLCO)	Moderate Restriction (51-70% TLC)	3rd	39	3rd ppFEF 25/75 (%)
199	ppTLC (%)	Diffusion Normal (>80% DLCO)	Moderate Restriction (51-70% TLC)	1st	61	1st ppTLC (%)
199	ppDLCO (%)	Diffusion Normal (>80% DLCO)	Moderate Restriction (51-70% TLC)	1st	85	1st ppDLCO (%)
199	ppFVC (%)	Diffusion Normal (>80% DLCO)	Moderate Restriction (51-70% TLC)	1st	66	1st ppFVC (%)
199	ppRV (%)	Diffusion Normal (>80% DLCO)	Moderate Restriction (51-70% TLC)	1st	34	1st ppRV (%)
199	ppFEV1 (%)	Diffusion Normal (>80% DLCO)	Moderate Restriction (51-70% TLC)	1st	68	1st ppFEV1 (%)
199	ppFEF 25/75 (%)	Diffusion Normal (>80% DLCO)	Moderate Restriction (51-70% TLC)	1st	76	1st ppFEF 25/75 (%)
200	ppTLC (%)	Diffusion Normal (>80% DLCO)	Mild Restriction (71-80% TLC)	1st	79	1st ppTLC (%)
200	ppDLCO (%)	Diffusion Normal (>80% DLCO)	Mild Restriction (71-80% TLC)	1st	108	1st ppDLCO (%)
200	ppFVC (%)	Diffusion Normal (>80% DLCO)	Mild Restriction (71-80% TLC)	1st	77	1st ppFVC (%)
200	ppRV (%)	Diffusion Normal (>80% DLCO)	Mild Restriction (71-80% TLC)	1st	60	1st ppRV (%)
200	ppFEV1 (%)	Diffusion Normal (>80% DLCO)	Mild Restriction (71-80% TLC)	1st	74	1st ppFEV1 (%)
200	ppFEF 25/75 (%)	Diffusion Normal (>80% DLCO)	Mild Restriction (71-80% TLC)	1st	66	1st ppFEF 25/75 (%)
200	ppTLC (%)	Diffusion Normal (>80% DLCO)	Mild Restriction (71-80% TLC)	2nd	76	2nd ppTLC (%)
200	ppDLCO (%)	Diffusion Normal (>80% DLCO)	Mild Restriction (71-80% TLC)	2nd	99	2nd ppDLCO (%)
200	ppFVC (%)	Diffusion Normal (>80% DLCO)	Mild Restriction (71-80% TLC)	2nd	92	2nd ppFVC (%)
200	ppRV (%)	Diffusion Normal (>80% DLCO)	Mild Restriction (71-80% TLC)	2nd	31	2nd ppRV (%)
200	ppFEV1 (%)	Diffusion Normal (>80% DLCO)	Mild Restriction (71-80% TLC)	2nd	85	2nd ppFEV1 (%)
200	ppFEF 25/75 (%)	Diffusion Normal (>80% DLCO)	Mild Restriction (71-80% TLC)	2nd	59	2nd ppFEF 25/75 (%)
201	ppTLC (%)	Diffusion Impaired (≤80% DLCO)	Mild Restriction (71-80% TLC)	1st	80	1st ppTLC (%)
201	ppDLCO (%)	Diffusion Impaired (≤80% DLCO)	Mild Restriction (71-80% TLC)	1st	80	1st ppDLCO (%)
201	ppFVC (%)	Diffusion Impaired (≤80% DLCO)	Mild Restriction (71-80% TLC)	1st	83	1st ppFVC (%)
201	ppRV (%)	Diffusion Impaired (≤80% DLCO)	Mild Restriction (71-80% TLC)	1st	56	1st ppRV (%)
201	ppFEV1 (%)	Diffusion Impaired (≤80% DLCO)	Mild Restriction (71-80% TLC)	1st	85	1st ppFEV1 (%)
201	ppFEF 25/75 (%)	Diffusion Impaired (≤80% DLCO)	Mild Restriction (71-80% TLC)	1st	93	1st ppFEF 25/75 (%)
203	ppTLC (%)	Diffusion Normal (>80% DLCO)	No Restriction (>80% TLC)	1st	94	1st ppTLC (%)
203	ppDLCO (%)	Diffusion Normal (>80% DLCO)	No Restriction (>80% TLC)	1st	112	1st ppDLCO (%)
203	ppFVC (%)	Diffusion Normal (>80% DLCO)	No Restriction (>80% TLC)	1st	102	1st ppFVC (%)
203	ppRV (%)	Diffusion Normal (>80% DLCO)	No Restriction (>80% TLC)	1st	60	1st ppRV (%)
203	ppFEV1 (%)	Diffusion Normal (>80% DLCO)	No Restriction (>80% TLC)	1st	102	1st ppFEV1 (%)
203	ppFEF 25/75 (%)	Diffusion Normal (>80% DLCO)	No Restriction (>80% TLC)	1st	97	1st ppFEF 25/75 (%)
203	ppTLC (%)	Diffusion Normal (>80% DLCO)	No Restriction (>80% TLC)	2nd	92	2nd ppTLC (%)
203	ppDLCO (%)	Diffusion Normal (>80% DLCO)	No Restriction (>80% TLC)	2nd	126	2nd ppDLCO (%)
203	ppFVC (%)	Diffusion Normal (>80% DLCO)	No Restriction (>80% TLC)	2nd	75	2nd ppFVC (%)
203	ppRV (%)	Diffusion Normal (>80% DLCO)	No Restriction (>80% TLC)	2nd	95	2nd ppRV (%)
203	ppFEV1 (%)	Diffusion Normal (>80% DLCO)	No Restriction (>80% TLC)	2nd	78	2nd ppFEV1 (%)
203	ppFEF 25/75 (%)	Diffusion Normal (>80% DLCO)	No Restriction (>80% TLC)	2nd	77	2nd ppFEF 25/75 (%)
204	ppTLC (%)	Diffusion Impaired (≤80% DLCO)	Severe Restriction (≤50% TLC)	1st	32	1st ppTLC (%)
204	ppDLCO (%)	Diffusion Impaired (≤80% DLCO)	Severe Restriction (≤50% TLC)	1st	4	1st ppDLCO (%)
204	ppFVC (%)	Diffusion Impaired (≤80% DLCO)	Severe Restriction (≤50% TLC)	1st	47	1st ppFVC (%)
204	ppRV (%)	Diffusion Impaired (≤80% DLCO)	Severe Restriction (≤50% TLC)	1st	27	1st ppRV (%)
204	ppFEV1 (%)	Diffusion Impaired (≤80% DLCO)	Severe Restriction (≤50% TLC)	1st	61	1st ppFEV1 (%)
204	ppFEF 25/75 (%)	Diffusion Impaired (≤80% DLCO)	Severe Restriction (≤50% TLC)	1st	254	1st ppFEF 25/75 (%)
205	ppTLC (%)	Diffusion Normal (>80% DLCO)	Moderate Restriction (51-70% TLC)	1st	68	1st ppTLC (%)
205	ppDLCO (%)	Diffusion Normal (>80% DLCO)	Moderate Restriction (51-70% TLC)	1st	94	1st ppDLCO (%)
205	ppFVC (%)	Diffusion Normal (>80% DLCO)	Moderate Restriction (51-70% TLC)	1st	79	1st ppFVC (%)
205	ppRV (%)	Diffusion Normal (>80% DLCO)	Moderate Restriction (51-70% TLC)	1st	41	1st ppRV (%)
205	ppFEV1 (%)	Diffusion Normal (>80% DLCO)	Moderate Restriction (51-70% TLC)	1st	80	1st ppFEV1 (%)
205	ppFEF 25/75 (%)	Diffusion Normal (>80% DLCO)	Moderate Restriction (51-70% TLC)	1st	92	1st ppFEF 25/75 (%)
206	ppTLC (%)	Diffusion Normal (>80% DLCO)	Mild Restriction (71-80% TLC)	1st	72	1st ppTLC (%)
206	ppDLCO (%)	Diffusion Normal (>80% DLCO)	Mild Restriction (71-80% TLC)	1st	92	1st ppDLCO (%)
206	ppFVC (%)	Diffusion Normal (>80% DLCO)	Mild Restriction (71-80% TLC)	1st	97	1st ppFVC (%)
206	ppRV (%)	Diffusion Normal (>80% DLCO)	Mild Restriction (71-80% TLC)	1st	41	1st ppRV (%)
206	ppFEV1 (%)	Diffusion Normal (>80% DLCO)	Mild Restriction (71-80% TLC)	1st	76	1st ppFEV1 (%)
206	ppFEF 25/75 (%)	Diffusion Normal (>80% DLCO)	Mild Restriction (71-80% TLC)	1st	47	1st ppFEF 25/75 (%)
207	ppTLC (%)	Diffusion Normal (>80% DLCO)	Moderate Restriction (51-70% TLC)	1st	65	1st ppTLC (%)
207	ppDLCO (%)	Diffusion Normal (>80% DLCO)	Moderate Restriction (51-70% TLC)	1st	89	1st ppDLCO (%)
207	ppFVC (%)	Diffusion Normal (>80% DLCO)	Moderate Restriction (51-70% TLC)	1st	94	1st ppFVC (%)
207	ppRV (%)	Diffusion Normal (>80% DLCO)	Moderate Restriction (51-70% TLC)	1st	24	1st ppRV (%)
207	ppFEV1 (%)	Diffusion Normal (>80% DLCO)	Moderate Restriction (51-70% TLC)	1st	97	1st ppFEV1 (%)
207	ppFEF 25/75 (%)	Diffusion Normal (>80% DLCO)	Moderate Restriction (51-70% TLC)	1st	119	1st ppFEF 25/75 (%)
207	ppTLC (%)	Diffusion Normal (>80% DLCO)	Moderate Restriction (51-70% TLC)	2nd	63	2nd ppTLC (%)
207	ppDLCO (%)	Diffusion Normal (>80% DLCO)	Moderate Restriction (51-70% TLC)	2nd	77	2nd ppDLCO (%)
207	ppFVC (%)	Diffusion Normal (>80% DLCO)	Moderate Restriction (51-70% TLC)	2nd	94	2nd ppFVC (%)
207	ppRV (%)	Diffusion Normal (>80% DLCO)	Moderate Restriction (51-70% TLC)	2nd	22	2nd ppRV (%)
207	ppFEV1 (%)	Diffusion Normal (>80% DLCO)	Moderate Restriction (51-70% TLC)	2nd	99	2nd ppFEV1 (%)
207	ppFEF 25/75 (%)	Diffusion Normal (>80% DLCO)	Moderate Restriction (51-70% TLC)	2nd	125	2nd ppFEF 25/75 (%)
207	ppTLC (%)	Diffusion Normal (>80% DLCO)	Moderate Restriction (51-70% TLC)	3rd	77	3rd ppTLC (%)
207	ppDLCO (%)	Diffusion Normal (>80% DLCO)	Moderate Restriction (51-70% TLC)	3rd	84	3rd ppDLCO (%)
207	ppFVC (%)	Diffusion Normal (>80% DLCO)	Moderate Restriction (51-70% TLC)	3rd	115	3rd ppFVC (%)
207	ppRV (%)	Diffusion Normal (>80% DLCO)	Moderate Restriction (51-70% TLC)	3rd	26	3rd ppRV (%)
207	ppFEV1 (%)	Diffusion Normal (>80% DLCO)	Moderate Restriction (51-70% TLC)	3rd	122	3rd ppFEV1 (%)
207	ppFEF 25/75 (%)	Diffusion Normal (>80% DLCO)	Moderate Restriction (51-70% TLC)	3rd	163	3rd ppFEF 25/75 (%)
208	ppTLC (%)	Diffusion Normal (>80% DLCO)	No Restriction (>80% TLC)	1st	92	1st ppTLC (%)
208	ppDLCO (%)	Diffusion Normal (>80% DLCO)	No Restriction (>80% TLC)	1st	104	1st ppDLCO (%)
208	ppFVC (%)	Diffusion Normal (>80% DLCO)	No Restriction (>80% TLC)	1st	101	1st ppFVC (%)
208	ppRV (%)	Diffusion Normal (>80% DLCO)	No Restriction (>80% TLC)	1st	52	1st ppRV (%)
208	ppFEV1 (%)	Diffusion Normal (>80% DLCO)	No Restriction (>80% TLC)	1st	89	1st ppFEV1 (%)
208	ppFEF 25/75 (%)	Diffusion Normal (>80% DLCO)	No Restriction (>80% TLC)	1st	76	1st ppFEF 25/75 (%)
209	ppTLC (%)	Diffusion Impaired (≤80% DLCO)	Moderate Restriction (51-70% TLC)	1st	70	1st ppTLC (%)
209	ppDLCO (%)	Diffusion Impaired (≤80% DLCO)	Moderate Restriction (51-70% TLC)	1st	73	1st ppDLCO (%)
209	ppFVC (%)	Diffusion Impaired (≤80% DLCO)	Moderate Restriction (51-70% TLC)	1st	73	1st ppFVC (%)
209	ppRV (%)	Diffusion Impaired (≤80% DLCO)	Moderate Restriction (51-70% TLC)	1st	48	1st ppRV (%)
209	ppFEV1 (%)	Diffusion Impaired (≤80% DLCO)	Moderate Restriction (51-70% TLC)	1st	73	1st ppFEV1 (%)
209	ppFEF 25/75 (%)	Diffusion Impaired (≤80% DLCO)	Moderate Restriction (51-70% TLC)	1st	68	1st ppFEF 25/75 (%)
210	ppTLC (%)	Diffusion Normal (>80% DLCO)	No Restriction (>80% TLC)	1st	90	1st ppTLC (%)
210	ppDLCO (%)	Diffusion Normal (>80% DLCO)	No Restriction (>80% TLC)	1st	96	1st ppDLCO (%)
210	ppFVC (%)	Diffusion Normal (>80% DLCO)	No Restriction (>80% TLC)	1st	76	1st ppFVC (%)
210	ppRV (%)	Diffusion Normal (>80% DLCO)	No Restriction (>80% TLC)	1st	70	1st ppRV (%)
210	ppFEV1 (%)	Diffusion Normal (>80% DLCO)	No Restriction (>80% TLC)	1st	72	1st ppFEV1 (%)
210	ppFEF 25/75 (%)	Diffusion Normal (>80% DLCO)	No Restriction (>80% TLC)	1st	60	1st ppFEF 25/75 (%)
210	ppTLC (%)	Diffusion Normal (>80% DLCO)	No Restriction (>80% TLC)	2nd	92	2nd ppTLC (%)
210	ppDLCO (%)	Diffusion Normal (>80% DLCO)	No Restriction (>80% TLC)	2nd	85	2nd ppDLCO (%)
210	ppFVC (%)	Diffusion Normal (>80% DLCO)	No Restriction (>80% TLC)	2nd	93	2nd ppFVC (%)
210	ppRV (%)	Diffusion Normal (>80% DLCO)	No Restriction (>80% TLC)	2nd	76	2nd ppRV (%)
210	ppFEV1 (%)	Diffusion Normal (>80% DLCO)	No Restriction (>80% TLC)	2nd	87	2nd ppFEV1 (%)
210	ppFEF 25/75 (%)	Diffusion Normal (>80% DLCO)	No Restriction (>80% TLC)	2nd	63	2nd ppFEF 25/75 (%)
211	ppTLC (%)	Diffusion Normal (>80% DLCO)	Moderate Restriction (51-70% TLC)	1st	65	1st ppTLC (%)
211	ppDLCO (%)	Diffusion Normal (>80% DLCO)	Moderate Restriction (51-70% TLC)	1st	89	1st ppDLCO (%)
211	ppFVC (%)	Diffusion Normal (>80% DLCO)	Moderate Restriction (51-70% TLC)	1st	76	1st ppFVC (%)
211	ppRV (%)	Diffusion Normal (>80% DLCO)	Moderate Restriction (51-70% TLC)	1st	35	1st ppRV (%)
211	ppFEV1 (%)	Diffusion Normal (>80% DLCO)	Moderate Restriction (51-70% TLC)	1st	78	1st ppFEV1 (%)
211	ppFEF 25/75 (%)	Diffusion Normal (>80% DLCO)	Moderate Restriction (51-70% TLC)	1st	79	1st ppFEF 25/75 (%)
212	ppTLC (%)	Diffusion Normal (>80% DLCO)	No Restriction (>80% TLC)	1st	82	1st ppTLC (%)
212	ppDLCO (%)	Diffusion Normal (>80% DLCO)	No Restriction (>80% TLC)	1st	89	1st ppDLCO (%)
212	ppFVC (%)	Diffusion Normal (>80% DLCO)	No Restriction (>80% TLC)	1st	106	1st ppFVC (%)
212	ppRV (%)	Diffusion Normal (>80% DLCO)	No Restriction (>80% TLC)	1st	46	1st ppRV (%)
212	ppFEV1 (%)	Diffusion Normal (>80% DLCO)	No Restriction (>80% TLC)	1st	104	1st ppFEV1 (%)
212	ppFEF 25/75 (%)	Diffusion Normal (>80% DLCO)	No Restriction (>80% TLC)	1st	99	1st ppFEF 25/75 (%)
213	ppTLC (%)	Diffusion Impaired (≤80% DLCO)	Moderate Restriction (51-70% TLC)	1st	61	1st ppTLC (%)
213	ppDLCO (%)	Diffusion Impaired (≤80% DLCO)	Moderate Restriction (51-70% TLC)	1st	64	1st ppDLCO (%)
213	ppFVC (%)	Diffusion Impaired (≤80% DLCO)	Moderate Restriction (51-70% TLC)	1st	78	1st ppFVC (%)
213	ppRV (%)	Diffusion Impaired (≤80% DLCO)	Moderate Restriction (51-70% TLC)	1st	33	1st ppRV (%)
213	ppFEV1 (%)	Diffusion Impaired (≤80% DLCO)	Moderate Restriction (51-70% TLC)	1st	89	1st ppFEV1 (%)
213	ppFEF 25/75 (%)	Diffusion Impaired (≤80% DLCO)	Moderate Restriction (51-70% TLC)	1st	151	1st ppFEF 25/75 (%)
213	ppTLC (%)	Diffusion Impaired (≤80% DLCO)	Moderate Restriction (51-70% TLC)	2nd	58	2nd ppTLC (%)
213	ppDLCO (%)	Diffusion Impaired (≤80% DLCO)	Moderate Restriction (51-70% TLC)	2nd	68	2nd ppDLCO (%)
213	ppFVC (%)	Diffusion Impaired (≤80% DLCO)	Moderate Restriction (51-70% TLC)	2nd	81	2nd ppFVC (%)
213	ppRV (%)	Diffusion Impaired (≤80% DLCO)	Moderate Restriction (51-70% TLC)	2nd	17	2nd ppRV (%)
213	ppFEV1 (%)	Diffusion Impaired (≤80% DLCO)	Moderate Restriction (51-70% TLC)	2nd	91	2nd ppFEV1 (%)
213	ppFEF 25/75 (%)	Diffusion Impaired (≤80% DLCO)	Moderate Restriction (51-70% TLC)	2nd	145	2nd ppFEF 25/75 (%)
214	ppTLC (%)	Diffusion Impaired (≤80% DLCO)	No Restriction (>80% TLC)	1st	97	1st ppTLC (%)
214	ppDLCO (%)	Diffusion Impaired (≤80% DLCO)	No Restriction (>80% TLC)	1st	52	1st ppDLCO (%)
214	ppFVC (%)	Diffusion Impaired (≤80% DLCO)	No Restriction (>80% TLC)	1st	71	1st ppFVC (%)
214	ppRV (%)	Diffusion Impaired (≤80% DLCO)	No Restriction (>80% TLC)	1st	134	1st ppRV (%)
214	ppFEV1 (%)	Diffusion Impaired (≤80% DLCO)	No Restriction (>80% TLC)	1st	71	1st ppFEV1 (%)
214	ppFEF 25/75 (%)	Diffusion Impaired (≤80% DLCO)	No Restriction (>80% TLC)	1st	77	1st ppFEF 25/75 (%)
215	ppTLC (%)	Diffusion Impaired (≤80% DLCO)	Mild Restriction (71-80% TLC)	1st	77	1st ppTLC (%)
215	ppDLCO (%)	Diffusion Impaired (≤80% DLCO)	Mild Restriction (71-80% TLC)	1st	67	1st ppDLCO (%)
215	ppFVC (%)	Diffusion Impaired (≤80% DLCO)	Mild Restriction (71-80% TLC)	1st	114	1st ppFVC (%)
215	ppRV (%)	Diffusion Impaired (≤80% DLCO)	Mild Restriction (71-80% TLC)	1st	40	1st ppRV (%)
215	ppFEV1 (%)	Diffusion Impaired (≤80% DLCO)	Mild Restriction (71-80% TLC)	1st	123	1st ppFEV1 (%)
215	ppFEF 25/75 (%)	Diffusion Impaired (≤80% DLCO)	Mild Restriction (71-80% TLC)	1st	181	1st ppFEF 25/75 (%)
216	ppTLC (%)	Diffusion Normal (>80% DLCO)	Mild Restriction (71-80% TLC)	1st	74	1st ppTLC (%)
216	ppDLCO (%)	Diffusion Normal (>80% DLCO)	Mild Restriction (71-80% TLC)	1st	103	1st ppDLCO (%)
216	ppFVC (%)	Diffusion Normal (>80% DLCO)	Mild Restriction (71-80% TLC)	1st	84	1st ppFVC (%)
216	ppRV (%)	Diffusion Normal (>80% DLCO)	Mild Restriction (71-80% TLC)	1st	36	1st ppRV (%)
216	ppFEV1 (%)	Diffusion Normal (>80% DLCO)	Mild Restriction (71-80% TLC)	1st	76	1st ppFEV1 (%)
216	ppFEF 25/75 (%)	Diffusion Normal (>80% DLCO)	Mild Restriction (71-80% TLC)	1st	55	1st ppFEF 25/75 (%)
217	ppTLC (%)	Diffusion Impaired (≤80% DLCO)	Moderate Restriction (51-70% TLC)	1st	54	1st ppTLC (%)
217	ppDLCO (%)	Diffusion Impaired (≤80% DLCO)	Moderate Restriction (51-70% TLC)	1st	73	1st ppDLCO (%)
217	ppFVC (%)	Diffusion Impaired (≤80% DLCO)	Moderate Restriction (51-70% TLC)	1st	83	1st ppFVC (%)
217	ppRV (%)	Diffusion Impaired (≤80% DLCO)	Moderate Restriction (51-70% TLC)	1st	31	1st ppRV (%)
217	ppFEV1 (%)	Diffusion Impaired (≤80% DLCO)	Moderate Restriction (51-70% TLC)	1st	95	1st ppFEV1 (%)
217	ppFEF 25/75 (%)	Diffusion Impaired (≤80% DLCO)	Moderate Restriction (51-70% TLC)	1st	183	1st ppFEF 25/75 (%)
217	ppTLC (%)	Diffusion Impaired (≤80% DLCO)	Moderate Restriction (51-70% TLC)	2nd	59	2nd ppTLC (%)
217	ppDLCO (%)	Diffusion Impaired (≤80% DLCO)	Moderate Restriction (51-70% TLC)	2nd	86	2nd ppDLCO (%)
217	ppFVC (%)	Diffusion Impaired (≤80% DLCO)	Moderate Restriction (51-70% TLC)	2nd	87	2nd ppFVC (%)
217	ppRV (%)	Diffusion Impaired (≤80% DLCO)	Moderate Restriction (51-70% TLC)	2nd	42	2nd ppRV (%)
217	ppFEV1 (%)	Diffusion Impaired (≤80% DLCO)	Moderate Restriction (51-70% TLC)	2nd	98	2nd ppFEV1 (%)
217	ppFEF 25/75 (%)	Diffusion Impaired (≤80% DLCO)	Moderate Restriction (51-70% TLC)	2nd	186	2nd ppFEF 25/75 (%)
217	ppTLC (%)	Diffusion Impaired (≤80% DLCO)	Moderate Restriction (51-70% TLC)	3rd	66	3rd ppTLC (%)
217	ppDLCO (%)	Diffusion Impaired (≤80% DLCO)	Moderate Restriction (51-70% TLC)	3rd	79	3rd ppDLCO (%)
217	ppFVC (%)	Diffusion Impaired (≤80% DLCO)	Moderate Restriction (51-70% TLC)	3rd	84	3rd ppFVC (%)
217	ppRV (%)	Diffusion Impaired (≤80% DLCO)	Moderate Restriction (51-70% TLC)	3rd	54	3rd ppRV (%)
217	ppFEV1 (%)	Diffusion Impaired (≤80% DLCO)	Moderate Restriction (51-70% TLC)	3rd	92	3rd ppFEV1 (%)
217	ppFEF 25/75 (%)	Diffusion Impaired (≤80% DLCO)	Moderate Restriction (51-70% TLC)	3rd	145	3rd ppFEF 25/75 (%)
218	ppTLC (%)	Diffusion Impaired (≤80% DLCO)	Severe Restriction (≤50% TLC)	1st	44	1st ppTLC (%)
218	ppDLCO (%)	Diffusion Impaired (≤80% DLCO)	Severe Restriction (≤50% TLC)	1st	53	1st ppDLCO (%)
218	ppFVC (%)	Diffusion Impaired (≤80% DLCO)	Severe Restriction (≤50% TLC)	1st	49	1st ppFVC (%)
218	ppRV (%)	Diffusion Impaired (≤80% DLCO)	Severe Restriction (≤50% TLC)	1st	19	1st ppRV (%)
218	ppFEV1 (%)	Diffusion Impaired (≤80% DLCO)	Severe Restriction (≤50% TLC)	1st	53	1st ppFEV1 (%)
218	ppFEF 25/75 (%)	Diffusion Impaired (≤80% DLCO)	Severe Restriction (≤50% TLC)	1st	80	1st ppFEF 25/75 (%)
218	ppTLC (%)	Diffusion Impaired (≤80% DLCO)	Severe Restriction (≤50% TLC)	2nd	47	2nd ppTLC (%)
218	ppDLCO (%)	Diffusion Impaired (≤80% DLCO)	Severe Restriction (≤50% TLC)	2nd	59	2nd ppDLCO (%)
218	ppFVC (%)	Diffusion Impaired (≤80% DLCO)	Severe Restriction (≤50% TLC)	2nd	54	2nd ppFVC (%)
218	ppRV (%)	Diffusion Impaired (≤80% DLCO)	Severe Restriction (≤50% TLC)	2nd	26	2nd ppRV (%)
218	ppFEV1 (%)	Diffusion Impaired (≤80% DLCO)	Severe Restriction (≤50% TLC)	2nd	57	2nd ppFEV1 (%)
218	ppFEF 25/75 (%)	Diffusion Impaired (≤80% DLCO)	Severe Restriction (≤50% TLC)	2nd	85	2nd ppFEF 25/75 (%)
219	ppTLC (%)	Diffusion Normal (>80% DLCO)	Severe Restriction (≤50% TLC)	1st	49	1st ppTLC (%)
219	ppDLCO (%)	Diffusion Normal (>80% DLCO)	Severe Restriction (≤50% TLC)	1st	87	1st ppDLCO (%)
219	ppFVC (%)	Diffusion Normal (>80% DLCO)	Severe Restriction (≤50% TLC)	1st	77	1st ppFVC (%)
219	ppRV (%)	Diffusion Normal (>80% DLCO)	Severe Restriction (≤50% TLC)	1st	1	1st ppRV (%)
219	ppFEV1 (%)	Diffusion Normal (>80% DLCO)	Severe Restriction (≤50% TLC)	1st	76	1st ppFEV1 (%)
219	ppFEF 25/75 (%)	Diffusion Normal (>80% DLCO)	Severe Restriction (≤50% TLC)	1st	77	1st ppFEF 25/75 (%)
219	ppTLC (%)	Diffusion Normal (>80% DLCO)	Severe Restriction (≤50% TLC)	2nd	61	2nd ppTLC (%)
219	ppDLCO (%)	Diffusion Normal (>80% DLCO)	Severe Restriction (≤50% TLC)	2nd	89	2nd ppDLCO (%)
219	ppFVC (%)	Diffusion Normal (>80% DLCO)	Severe Restriction (≤50% TLC)	2nd	95	2nd ppFVC (%)
219	ppRV (%)	Diffusion Normal (>80% DLCO)	Severe Restriction (≤50% TLC)	2nd	3	2nd ppRV (%)
219	ppFEV1 (%)	Diffusion Normal (>80% DLCO)	Severe Restriction (≤50% TLC)	2nd	91	2nd ppFEV1 (%)
219	ppFEF 25/75 (%)	Diffusion Normal (>80% DLCO)	Severe Restriction (≤50% TLC)	2nd	88	2nd ppFEF 25/75 (%)
220	ppTLC (%)	Diffusion Normal (>80% DLCO)	No Restriction (>80% TLC)	1st	83	1st ppTLC (%)
220	ppDLCO (%)	Diffusion Normal (>80% DLCO)	No Restriction (>80% TLC)	1st	92	1st ppDLCO (%)
220	ppFVC (%)	Diffusion Normal (>80% DLCO)	No Restriction (>80% TLC)	1st	64	1st ppFVC (%)
220	ppRV (%)	Diffusion Normal (>80% DLCO)	No Restriction (>80% TLC)	1st	89	1st ppRV (%)
220	ppFEV1 (%)	Diffusion Normal (>80% DLCO)	No Restriction (>80% TLC)	1st	68	1st ppFEV1 (%)
220	ppFEF 25/75 (%)	Diffusion Normal (>80% DLCO)	No Restriction (>80% TLC)	1st	115	1st ppFEF 25/75 (%)
220	ppTLC (%)	Diffusion Normal (>80% DLCO)	No Restriction (>80% TLC)	2nd	66	2nd ppTLC (%)
220	ppDLCO (%)	Diffusion Normal (>80% DLCO)	No Restriction (>80% TLC)	2nd	65	2nd ppDLCO (%)
220	ppFVC (%)	Diffusion Normal (>80% DLCO)	No Restriction (>80% TLC)	2nd	64	2nd ppFVC (%)
220	ppRV (%)	Diffusion Normal (>80% DLCO)	No Restriction (>80% TLC)	2nd	64	2nd ppRV (%)
220	ppFEV1 (%)	Diffusion Normal (>80% DLCO)	No Restriction (>80% TLC)	2nd	66	2nd ppFEV1 (%)
220	ppFEF 25/75 (%)	Diffusion Normal (>80% DLCO)	No Restriction (>80% TLC)	2nd	56	2nd ppFEF 25/75 (%)
220	ppTLC (%)	Diffusion Normal (>80% DLCO)	No Restriction (>80% TLC)	3rd	52	3rd ppTLC (%)
220	ppDLCO (%)	Diffusion Normal (>80% DLCO)	No Restriction (>80% TLC)	3rd	59	3rd ppDLCO (%)
220	ppFVC (%)	Diffusion Normal (>80% DLCO)	No Restriction (>80% TLC)	3rd	54	3rd ppFVC (%)
220	ppRV (%)	Diffusion Normal (>80% DLCO)	No Restriction (>80% TLC)	3rd	41	3rd ppRV (%)
220	ppFEV1 (%)	Diffusion Normal (>80% DLCO)	No Restriction (>80% TLC)	3rd	52	3rd ppFEV1 (%)
220	ppFEF 25/75 (%)	Diffusion Normal (>80% DLCO)	No Restriction (>80% TLC)	3rd	43	3rd ppFEF 25/75 (%)
221	ppTLC (%)	Diffusion Impaired (≤80% DLCO)	Severe Restriction (≤50% TLC)	1st	47	1st ppTLC (%)
221	ppDLCO (%)	Diffusion Impaired (≤80% DLCO)	Severe Restriction (≤50% TLC)	1st	46	1st ppDLCO (%)
221	ppFVC (%)	Diffusion Impaired (≤80% DLCO)	Severe Restriction (≤50% TLC)	1st	56	1st ppFVC (%)
221	ppRV (%)	Diffusion Impaired (≤80% DLCO)	Severe Restriction (≤50% TLC)	1st	41	1st ppRV (%)
221	ppFEV1 (%)	Diffusion Impaired (≤80% DLCO)	Severe Restriction (≤50% TLC)	1st	57	1st ppFEV1 (%)
221	ppFEF 25/75 (%)	Diffusion Impaired (≤80% DLCO)	Severe Restriction (≤50% TLC)	1st	62	1st ppFEF 25/75 (%)
221	ppTLC (%)	Diffusion Impaired (≤80% DLCO)	Severe Restriction (≤50% TLC)	2nd	50	2nd ppTLC (%)
221	ppDLCO (%)	Diffusion Impaired (≤80% DLCO)	Severe Restriction (≤50% TLC)	2nd	33	2nd ppDLCO (%)
221	ppFVC (%)	Diffusion Impaired (≤80% DLCO)	Severe Restriction (≤50% TLC)	2nd	59	2nd ppFVC (%)
221	ppRV (%)	Diffusion Impaired (≤80% DLCO)	Severe Restriction (≤50% TLC)	2nd	43	2nd ppRV (%)
221	ppFEV1 (%)	Diffusion Impaired (≤80% DLCO)	Severe Restriction (≤50% TLC)	2nd	60	2nd ppFEV1 (%)
221	ppFEF 25/75 (%)	Diffusion Impaired (≤80% DLCO)	Severe Restriction (≤50% TLC)	2nd	60	2nd ppFEF 25/75 (%)
222	ppTLC (%)	Diffusion Normal (>80% DLCO)	Moderate Restriction (51-70% TLC)	1st	70	1st ppTLC (%)
222	ppDLCO (%)	Diffusion Normal (>80% DLCO)	Moderate Restriction (51-70% TLC)	1st	89	1st ppDLCO (%)
222	ppFVC (%)	Diffusion Normal (>80% DLCO)	Moderate Restriction (51-70% TLC)	1st	83	1st ppFVC (%)
222	ppRV (%)	Diffusion Normal (>80% DLCO)	Moderate Restriction (51-70% TLC)	1st	31	1st ppRV (%)
222	ppFEV1 (%)	Diffusion Normal (>80% DLCO)	Moderate Restriction (51-70% TLC)	1st	85	1st ppFEV1 (%)
222	ppFEF 25/75 (%)	Diffusion Normal (>80% DLCO)	Moderate Restriction (51-70% TLC)	1st	88	1st ppFEF 25/75 (%)
223	ppTLC (%)	Diffusion Normal (>80% DLCO)	No Restriction (>80% TLC)	1st	90	1st ppTLC (%)
223	ppDLCO (%)	Diffusion Normal (>80% DLCO)	No Restriction (>80% TLC)	1st	134	1st ppDLCO (%)
223	ppFVC (%)	Diffusion Normal (>80% DLCO)	No Restriction (>80% TLC)	1st	98	1st ppFVC (%)
223	ppRV (%)	Diffusion Normal (>80% DLCO)	No Restriction (>80% TLC)	1st	91	1st ppRV (%)
223	ppFEV1 (%)	Diffusion Normal (>80% DLCO)	No Restriction (>80% TLC)	1st	98	1st ppFEV1 (%)
223	ppFEF 25/75 (%)	Diffusion Normal (>80% DLCO)	No Restriction (>80% TLC)	1st	101	1st ppFEF 25/75 (%)
224	ppTLC (%)	Diffusion Normal (>80% DLCO)	No Restriction (>80% TLC)	1st	88	1st ppTLC (%)
224	ppDLCO (%)	Diffusion Normal (>80% DLCO)	No Restriction (>80% TLC)	1st	110	1st ppDLCO (%)
224	ppFVC (%)	Diffusion Normal (>80% DLCO)	No Restriction (>80% TLC)	1st	108	1st ppFVC (%)
224	ppRV (%)	Diffusion Normal (>80% DLCO)	No Restriction (>80% TLC)	1st	20	1st ppRV (%)
224	ppFEV1 (%)	Diffusion Normal (>80% DLCO)	No Restriction (>80% TLC)	1st	99	1st ppFEV1 (%)
224	ppFEF 25/75 (%)	Diffusion Normal (>80% DLCO)	No Restriction (>80% TLC)	1st	88	1st ppFEF 25/75 (%)
224	ppTLC (%)	Diffusion Normal (>80% DLCO)	No Restriction (>80% TLC)	2nd	101	2nd ppTLC (%)
224	ppDLCO (%)	Diffusion Normal (>80% DLCO)	No Restriction (>80% TLC)	2nd	120	2nd ppDLCO (%)
224	ppFVC (%)	Diffusion Normal (>80% DLCO)	No Restriction (>80% TLC)	2nd	109	2nd ppFVC (%)
224	ppRV (%)	Diffusion Normal (>80% DLCO)	No Restriction (>80% TLC)	2nd	60	2nd ppRV (%)
224	ppFEV1 (%)	Diffusion Normal (>80% DLCO)	No Restriction (>80% TLC)	2nd	100	2nd ppFEV1 (%)
224	ppFEF 25/75 (%)	Diffusion Normal (>80% DLCO)	No Restriction (>80% TLC)	2nd	88	2nd ppFEF 25/75 (%)
225	ppTLC (%)	Diffusion Normal (>80% DLCO)	No Restriction (>80% TLC)	1st	84	1st ppTLC (%)
225	ppDLCO (%)	Diffusion Normal (>80% DLCO)	No Restriction (>80% TLC)	1st	86	1st ppDLCO (%)
225	ppFVC (%)	Diffusion Normal (>80% DLCO)	No Restriction (>80% TLC)	1st	97	1st ppFVC (%)
225	ppRV (%)	Diffusion Normal (>80% DLCO)	No Restriction (>80% TLC)	1st	47	1st ppRV (%)
225	ppFEV1 (%)	Diffusion Normal (>80% DLCO)	No Restriction (>80% TLC)	1st	72	1st ppFEV1 (%)
225	ppFEF 25/75 (%)	Diffusion Normal (>80% DLCO)	No Restriction (>80% TLC)	1st	30	1st ppFEF 25/75 (%)
225	ppTLC (%)	Diffusion Normal (>80% DLCO)	No Restriction (>80% TLC)	2nd	69	2nd ppTLC (%)
225	ppDLCO (%)	Diffusion Normal (>80% DLCO)	No Restriction (>80% TLC)	2nd	97	2nd ppDLCO (%)
225	ppFVC (%)	Diffusion Normal (>80% DLCO)	No Restriction (>80% TLC)	2nd	94	2nd ppFVC (%)
225	ppRV (%)	Diffusion Normal (>80% DLCO)	No Restriction (>80% TLC)	2nd	12	2nd ppRV (%)
225	ppFEV1 (%)	Diffusion Normal (>80% DLCO)	No Restriction (>80% TLC)	2nd	77	2nd ppFEV1 (%)
225	ppFEF 25/75 (%)	Diffusion Normal (>80% DLCO)	No Restriction (>80% TLC)	2nd	37	2nd ppFEF 25/75 (%)
225	ppTLC (%)	Diffusion Normal (>80% DLCO)	No Restriction (>80% TLC)	3rd	94	3rd ppTLC (%)
225	ppDLCO (%)	Diffusion Normal (>80% DLCO)	No Restriction (>80% TLC)	3rd	95	3rd ppDLCO (%)
225	ppFVC (%)	Diffusion Normal (>80% DLCO)	No Restriction (>80% TLC)	3rd	99	3rd ppFVC (%)
225	ppRV (%)	Diffusion Normal (>80% DLCO)	No Restriction (>80% TLC)	3rd	64	3rd ppRV (%)
225	ppFEV1 (%)	Diffusion Normal (>80% DLCO)	No Restriction (>80% TLC)	3rd	87	3rd ppFEV1 (%)
225	ppFEF 25/75 (%)	Diffusion Normal (>80% DLCO)	No Restriction (>80% TLC)	3rd	49	3rd ppFEF 25/75 (%)
72	ppTLC (%)	Diffusion Impaired (≤80% DLCO)	Moderate Restriction (51-70% TLC)	1st	51	1st ppTLC (%)
72	ppDLCO (%)	Diffusion Impaired (≤80% DLCO)	Moderate Restriction (51-70% TLC)	1st	38	1st ppDLCO (%)
72	ppFVC (%)	Diffusion Impaired (≤80% DLCO)	Moderate Restriction (51-70% TLC)	1st	65	1st ppFVC (%)
72	ppRV (%)	Diffusion Impaired (≤80% DLCO)	Moderate Restriction (51-70% TLC)	1st	42	1st ppRV (%)
72	ppFEV1 (%)	Diffusion Impaired (≤80% DLCO)	Moderate Restriction (51-70% TLC)	1st	76	1st ppFEV1 (%)
72	ppFEF 25/75 (%)	Diffusion Impaired (≤80% DLCO)	Moderate Restriction (51-70% TLC)	1st	147	1st ppFEF 25/75 (%)
38	ppTLC (%)	Diffusion Impaired (≤80% DLCO)	No Restriction (>80% TLC)	1st	82	1st ppTLC (%)
38	ppDLCO (%)	Diffusion Impaired (≤80% DLCO)	No Restriction (>80% TLC)	1st	66	1st ppDLCO (%)
38	ppFVC (%)	Diffusion Impaired (≤80% DLCO)	No Restriction (>80% TLC)	1st	86	1st ppFVC (%)
38	ppRV (%)	Diffusion Impaired (≤80% DLCO)	No Restriction (>80% TLC)	1st	68	1st ppRV (%)
38	ppFEV1 (%)	Diffusion Impaired (≤80% DLCO)	No Restriction (>80% TLC)	1st	88	1st ppFEV1 (%)
38	ppFEF 25/75 (%)	Diffusion Impaired (≤80% DLCO)	No Restriction (>80% TLC)	1st	100	1st ppFEF 25/75 (%)
38	ppTLC (%)	Diffusion Impaired (≤80% DLCO)	No Restriction (>80% TLC)	2nd	75	2nd ppTLC (%)
38	ppDLCO (%)	Diffusion Impaired (≤80% DLCO)	No Restriction (>80% TLC)	2nd	94	2nd ppDLCO (%)
38	ppFVC (%)	Diffusion Impaired (≤80% DLCO)	No Restriction (>80% TLC)	2nd	88	2nd ppFVC (%)
38	ppRV (%)	Diffusion Impaired (≤80% DLCO)	No Restriction (>80% TLC)	2nd	41	2nd ppRV (%)
38	ppFEV1 (%)	Diffusion Impaired (≤80% DLCO)	No Restriction (>80% TLC)	2nd	93	2nd ppFEV1 (%)
38	ppFEF 25/75 (%)	Diffusion Impaired (≤80% DLCO)	No Restriction (>80% TLC)	2nd	115	2nd ppFEF 25/75 (%)
38	ppTLC (%)	Diffusion Impaired (≤80% DLCO)	No Restriction (>80% TLC)	3rd	74	3rd ppTLC (%)
38	ppDLCO (%)	Diffusion Impaired (≤80% DLCO)	No Restriction (>80% TLC)	3rd	101	3rd ppDLCO (%)
38	ppFVC (%)	Diffusion Impaired (≤80% DLCO)	No Restriction (>80% TLC)	3rd	79	3rd ppFVC (%)
38	ppRV (%)	Diffusion Impaired (≤80% DLCO)	No Restriction (>80% TLC)	3rd	59	3rd ppRV (%)
38	ppFEV1 (%)	Diffusion Impaired (≤80% DLCO)	No Restriction (>80% TLC)	3rd	81	3rd ppFEV1 (%)
38	ppFEF 25/75 (%)	Diffusion Impaired (≤80% DLCO)	No Restriction (>80% TLC)	3rd	91	3rd ppFEF 25/75 (%)
109	ppTLC (%)	Diffusion Impaired (≤80% DLCO)	Moderate Restriction (51-70% TLC)	1st	69	1st ppTLC (%)
109	ppDLCO (%)	Diffusion Impaired (≤80% DLCO)	Moderate Restriction (51-70% TLC)	1st	63	1st ppDLCO (%)
109	ppFVC (%)	Diffusion Impaired (≤80% DLCO)	Moderate Restriction (51-70% TLC)	1st	78	1st ppFVC (%)
109	ppRV (%)	Diffusion Impaired (≤80% DLCO)	Moderate Restriction (51-70% TLC)	1st	44	1st ppRV (%)
109	ppFEV1 (%)	Diffusion Impaired (≤80% DLCO)	Moderate Restriction (51-70% TLC)	1st	63	1st ppFEV1 (%)
109	ppFEF 25/75 (%)	Diffusion Impaired (≤80% DLCO)	Moderate Restriction (51-70% TLC)	1st	32	1st ppFEF 25/75 (%)
28	ppTLC (%)	Diffusion Impaired (≤80% DLCO)	No Restriction (>80% TLC)	1st	149	1st ppTLC (%)
28	ppDLCO (%)	Diffusion Impaired (≤80% DLCO)	No Restriction (>80% TLC)	1st	66	1st ppDLCO (%)
28	ppFVC (%)	Diffusion Impaired (≤80% DLCO)	No Restriction (>80% TLC)	1st	47	1st ppFVC (%)
28	ppRV (%)	Diffusion Impaired (≤80% DLCO)	No Restriction (>80% TLC)	1st	300	1st ppRV (%)
28	ppFEV1 (%)	Diffusion Impaired (≤80% DLCO)	No Restriction (>80% TLC)	1st	40	1st ppFEV1 (%)
28	ppFEF 25/75 (%)	Diffusion Impaired (≤80% DLCO)	No Restriction (>80% TLC)	1st	23	1st ppFEF 25/75 (%)
82	ppTLC (%)	Diffusion Impaired (≤80% DLCO)	No Restriction (>80% TLC)	1st	90	1st ppTLC (%)
82	ppDLCO (%)	Diffusion Impaired (≤80% DLCO)	No Restriction (>80% TLC)	1st	71	1st ppDLCO (%)
82	ppFVC (%)	Diffusion Impaired (≤80% DLCO)	No Restriction (>80% TLC)	1st	79	1st ppFVC (%)
82	ppRV (%)	Diffusion Impaired (≤80% DLCO)	No Restriction (>80% TLC)	1st	101	1st ppRV (%)
82	ppFEV1 (%)	Diffusion Impaired (≤80% DLCO)	No Restriction (>80% TLC)	1st	91	1st ppFEV1 (%)
82	ppFEF 25/75 (%)	Diffusion Impaired (≤80% DLCO)	No Restriction (>80% TLC)	1st	142	1st ppFEF 25/75 (%)
118	ppTLC (%)	Diffusion Normal (>80% DLCO)	No Restriction (>80% TLC)	1st	95	1st ppTLC (%)
118	ppDLCO (%)	Diffusion Normal (>80% DLCO)	No Restriction (>80% TLC)	1st	111	1st ppDLCO (%)
118	ppFVC (%)	Diffusion Normal (>80% DLCO)	No Restriction (>80% TLC)	1st	135	1st ppFVC (%)
118	ppRV (%)	Diffusion Normal (>80% DLCO)	No Restriction (>80% TLC)	1st	53	1st ppRV (%)
118	ppFEV1 (%)	Diffusion Normal (>80% DLCO)	No Restriction (>80% TLC)	1st	141	1st ppFEV1 (%)
118	ppFEF 25/75 (%)	Diffusion Normal (>80% DLCO)	No Restriction (>80% TLC)	1st	176	1st ppFEF 25/75 (%)
884	ppTLC (%)	Diffusion Normal (>80% DLCO)	Mild Restriction (71-80% TLC)	1st	75	1st ppTLC (%)
884	ppDLCO (%)	Diffusion Normal (>80% DLCO)	Mild Restriction (71-80% TLC)	1st	85	1st ppDLCO (%)
884	ppFVC (%)	Diffusion Normal (>80% DLCO)	Mild Restriction (71-80% TLC)	1st	88	1st ppFVC (%)
884	ppRV (%)	Diffusion Normal (>80% DLCO)	Mild Restriction (71-80% TLC)	1st	51	1st ppRV (%)
884	ppFEV1 (%)	Diffusion Normal (>80% DLCO)	Mild Restriction (71-80% TLC)	1st	87	1st ppFEV1 (%)
884	ppFEF 25/75 (%)	Diffusion Normal (>80% DLCO)	Mild Restriction (71-80% TLC)	1st	87	1st ppFEF 25/75 (%)
59	ppTLC (%)	Diffusion Impaired (≤80% DLCO)	Moderate Restriction (51-70% TLC)	1st	59	1st ppTLC (%)
59	ppDLCO (%)	Diffusion Impaired (≤80% DLCO)	Moderate Restriction (51-70% TLC)	1st	61	1st ppDLCO (%)
59	ppFVC (%)	Diffusion Impaired (≤80% DLCO)	Moderate Restriction (51-70% TLC)	1st	82	1st ppFVC (%)
59	ppRV (%)	Diffusion Impaired (≤80% DLCO)	Moderate Restriction (51-70% TLC)	1st	28	1st ppRV (%)
59	ppFEV1 (%)	Diffusion Impaired (≤80% DLCO)	Moderate Restriction (51-70% TLC)	1st	84	1st ppFEV1 (%)
59	ppFEF 25/75 (%)	Diffusion Impaired (≤80% DLCO)	Moderate Restriction (51-70% TLC)	1st	95	1st ppFEF 25/75 (%)
86	ppTLC (%)	Diffusion Normal (>80% DLCO)	No Restriction (>80% TLC)	1st	88	1st ppTLC (%)
86	ppDLCO (%)	Diffusion Normal (>80% DLCO)	No Restriction (>80% TLC)	1st	105	1st ppDLCO (%)
86	ppFVC (%)	Diffusion Normal (>80% DLCO)	No Restriction (>80% TLC)	1st	97	1st ppFVC (%)
86	ppRV (%)	Diffusion Normal (>80% DLCO)	No Restriction (>80% TLC)	1st	48	1st ppRV (%)
86	ppFEV1 (%)	Diffusion Normal (>80% DLCO)	No Restriction (>80% TLC)	1st	110	1st ppFEV1 (%)
86	ppFEF 25/75 (%)	Diffusion Normal (>80% DLCO)	No Restriction (>80% TLC)	1st	130	1st ppFEF 25/75 (%)
834	ppTLC (%)	Diffusion Impaired (≤80% DLCO)	Severe Restriction (≤50% TLC)	1st	39	1st ppTLC (%)
834	ppDLCO (%)	Diffusion Impaired (≤80% DLCO)	Severe Restriction (≤50% TLC)	1st	26	1st ppDLCO (%)
834	ppFVC (%)	Diffusion Impaired (≤80% DLCO)	Severe Restriction (≤50% TLC)	1st	46	1st ppFVC (%)
834	ppRV (%)	Diffusion Impaired (≤80% DLCO)	Severe Restriction (≤50% TLC)	1st	40	1st ppRV (%)
834	ppFEV1 (%)	Diffusion Impaired (≤80% DLCO)	Severe Restriction (≤50% TLC)	1st	48	1st ppFEV1 (%)
834	ppFEF 25/75 (%)	Diffusion Impaired (≤80% DLCO)	Severe Restriction (≤50% TLC)	1st	67	1st ppFEF 25/75 (%)
834	ppTLC (%)	Diffusion Impaired (≤80% DLCO)	Severe Restriction (≤50% TLC)	2nd	57	2nd ppTLC (%)
834	ppDLCO (%)	Diffusion Impaired (≤80% DLCO)	Severe Restriction (≤50% TLC)	2nd	37	2nd ppDLCO (%)
834	ppFVC (%)	Diffusion Impaired (≤80% DLCO)	Severe Restriction (≤50% TLC)	2nd	65	2nd ppFVC (%)
834	ppRV (%)	Diffusion Impaired (≤80% DLCO)	Severe Restriction (≤50% TLC)	2nd	59	2nd ppRV (%)
834	ppFEV1 (%)	Diffusion Impaired (≤80% DLCO)	Severe Restriction (≤50% TLC)	2nd	70	2nd ppFEV1 (%)
834	ppFEF 25/75 (%)	Diffusion Impaired (≤80% DLCO)	Severe Restriction (≤50% TLC)	2nd	96	2nd ppFEF 25/75 (%)
834	ppTLC (%)	Diffusion Impaired (≤80% DLCO)	Severe Restriction (≤50% TLC)	3rd	44	3rd ppTLC (%)
834	ppDLCO (%)	Diffusion Impaired (≤80% DLCO)	Severe Restriction (≤50% TLC)	3rd	48	3rd ppDLCO (%)
834	ppFVC (%)	Diffusion Impaired (≤80% DLCO)	Severe Restriction (≤50% TLC)	3rd	57	3rd ppFVC (%)
834	ppRV (%)	Diffusion Impaired (≤80% DLCO)	Severe Restriction (≤50% TLC)	3rd	36	3rd ppRV (%)
834	ppFEV1 (%)	Diffusion Impaired (≤80% DLCO)	Severe Restriction (≤50% TLC)	3rd	60	3rd ppFEV1 (%)
834	ppFEF 25/75 (%)	Diffusion Impaired (≤80% DLCO)	Severe Restriction (≤50% TLC)	3rd	82	3rd ppFEF 25/75 (%)
879	ppTLC (%)	Diffusion Impaired (≤80% DLCO)	Severe Restriction (≤50% TLC)	1st	32	1st ppTLC (%)
879	ppDLCO (%)	Diffusion Impaired (≤80% DLCO)	Severe Restriction (≤50% TLC)	1st	18	1st ppDLCO (%)
879	ppFVC (%)	Diffusion Impaired (≤80% DLCO)	Severe Restriction (≤50% TLC)	1st	36	1st ppFVC (%)
879	ppRV (%)	Diffusion Impaired (≤80% DLCO)	Severe Restriction (≤50% TLC)	1st	19	1st ppRV (%)
879	ppFEV1 (%)	Diffusion Impaired (≤80% DLCO)	Severe Restriction (≤50% TLC)	1st	39	1st ppFEV1 (%)
879	ppFEF 25/75 (%)	Diffusion Impaired (≤80% DLCO)	Severe Restriction (≤50% TLC)	1st	43	1st ppFEF 25/75 (%)
879	ppFVC (%)	Diffusion Impaired (≤80% DLCO)	Severe Restriction (≤50% TLC)	2nd	62	2nd ppFVC (%)
879	ppFEV1 (%)	Diffusion Impaired (≤80% DLCO)	Severe Restriction (≤50% TLC)	2nd	60	2nd ppFEV1 (%)
879	ppFEF 25/75 (%)	Diffusion Impaired (≤80% DLCO)	Severe Restriction (≤50% TLC)	2nd	57	2nd ppFEF 25/75 (%)
85	ppTLC (%)	Diffusion Normal (>80% DLCO)	Moderate Restriction (51-70% TLC)	1st	57	1st ppTLC (%)
85	ppDLCO (%)	Diffusion Normal (>80% DLCO)	Moderate Restriction (51-70% TLC)	1st	93	1st ppDLCO (%)
85	ppFVC (%)	Diffusion Normal (>80% DLCO)	Moderate Restriction (51-70% TLC)	1st	59	1st ppFVC (%)
85	ppRV (%)	Diffusion Normal (>80% DLCO)	Moderate Restriction (51-70% TLC)	1st	59	1st ppRV (%)
85	ppFEV1 (%)	Diffusion Normal (>80% DLCO)	Moderate Restriction (51-70% TLC)	1st	72	1st ppFEV1 (%)
85	ppFEF 25/75 (%)	Diffusion Normal (>80% DLCO)	Moderate Restriction (51-70% TLC)	1st	126	1st ppFEF 25/75 (%)
869	ppTLC (%)	Diffusion Normal (>80% DLCO)	Mild Restriction (71-80% TLC)	1st	75	1st ppTLC (%)
869	ppDLCO (%)	Diffusion Normal (>80% DLCO)	Mild Restriction (71-80% TLC)	1st	93	1st ppDLCO (%)
869	ppFVC (%)	Diffusion Normal (>80% DLCO)	Mild Restriction (71-80% TLC)	1st	92	1st ppFVC (%)
869	ppRV (%)	Diffusion Normal (>80% DLCO)	Mild Restriction (71-80% TLC)	1st	61	1st ppRV (%)
869	ppFEV1 (%)	Diffusion Normal (>80% DLCO)	Mild Restriction (71-80% TLC)	1st	84	1st ppFEV1 (%)
869	ppFEF 25/75 (%)	Diffusion Normal (>80% DLCO)	Mild Restriction (71-80% TLC)	1st	59	1st ppFEF 25/75 (%)
915	ppTLC (%)	Diffusion Impaired (≤80% DLCO)	Severe Restriction (≤50% TLC)	1st	50	1st ppTLC (%)
915	ppDLCO (%)	Diffusion Impaired (≤80% DLCO)	Severe Restriction (≤50% TLC)	1st	37	1st ppDLCO (%)
915	ppFVC (%)	Diffusion Impaired (≤80% DLCO)	Severe Restriction (≤50% TLC)	1st	59	1st ppFVC (%)
915	ppRV (%)	Diffusion Impaired (≤80% DLCO)	Severe Restriction (≤50% TLC)	1st	32	1st ppRV (%)
915	ppFEV1 (%)	Diffusion Impaired (≤80% DLCO)	Severe Restriction (≤50% TLC)	1st	64	1st ppFEV1 (%)
915	ppFEF 25/75 (%)	Diffusion Impaired (≤80% DLCO)	Severe Restriction (≤50% TLC)	1st	105	1st ppFEF 25/75 (%)
887	ppTLC (%)	Diffusion Impaired (≤80% DLCO)	Moderate Restriction (51-70% TLC)	1st	63	1st ppTLC (%)
887	ppDLCO (%)	Diffusion Impaired (≤80% DLCO)	Moderate Restriction (51-70% TLC)	1st	52	1st ppDLCO (%)
887	ppFVC (%)	Diffusion Impaired (≤80% DLCO)	Moderate Restriction (51-70% TLC)	1st	75	1st ppFVC (%)
887	ppRV (%)	Diffusion Impaired (≤80% DLCO)	Moderate Restriction (51-70% TLC)	1st	63	1st ppRV (%)
887	ppFEV1 (%)	Diffusion Impaired (≤80% DLCO)	Moderate Restriction (51-70% TLC)	1st	73	1st ppFEV1 (%)
887	ppFEF 25/75 (%)	Diffusion Impaired (≤80% DLCO)	Moderate Restriction (51-70% TLC)	1st	63	1st ppFEF 25/75 (%)
887	ppTLC (%)	Diffusion Impaired (≤80% DLCO)	Moderate Restriction (51-70% TLC)	2nd	62	2nd ppTLC (%)
887	ppDLCO (%)	Diffusion Impaired (≤80% DLCO)	Moderate Restriction (51-70% TLC)	2nd	53	2nd ppDLCO (%)
887	ppFVC (%)	Diffusion Impaired (≤80% DLCO)	Moderate Restriction (51-70% TLC)	2nd	97	2nd ppFVC (%)
887	ppRV (%)	Diffusion Impaired (≤80% DLCO)	Moderate Restriction (51-70% TLC)	2nd	46	2nd ppRV (%)
887	ppFEV1 (%)	Diffusion Impaired (≤80% DLCO)	Moderate Restriction (51-70% TLC)	2nd	97	2nd ppFEV1 (%)
887	ppFEF 25/75 (%)	Diffusion Impaired (≤80% DLCO)	Moderate Restriction (51-70% TLC)	2nd	103	2nd ppFEF 25/75 (%)
887	ppTLC (%)	Diffusion Impaired (≤80% DLCO)	Moderate Restriction (51-70% TLC)	3rd	41	3rd ppTLC (%)
887	ppDLCO (%)	Diffusion Impaired (≤80% DLCO)	Moderate Restriction (51-70% TLC)	3rd	60	3rd ppDLCO (%)
887	ppFVC (%)	Diffusion Impaired (≤80% DLCO)	Moderate Restriction (51-70% TLC)	3rd	76	3rd ppFVC (%)
887	ppRV (%)	Diffusion Impaired (≤80% DLCO)	Moderate Restriction (51-70% TLC)	3rd	19	3rd ppRV (%)
887	ppFEV1 (%)	Diffusion Impaired (≤80% DLCO)	Moderate Restriction (51-70% TLC)	3rd	73	3rd ppFEV1 (%)
887	ppFEF 25/75 (%)	Diffusion Impaired (≤80% DLCO)	Moderate Restriction (51-70% TLC)	3rd	66	3rd ppFEF 25/75 (%)
67	ppTLC (%)	Diffusion Impaired (≤80% DLCO)	Mild Restriction (71-80% TLC)	1st	77	1st ppTLC (%)
67	ppDLCO (%)	Diffusion Impaired (≤80% DLCO)	Mild Restriction (71-80% TLC)	1st	72	1st ppDLCO (%)
67	ppFVC (%)	Diffusion Impaired (≤80% DLCO)	Mild Restriction (71-80% TLC)	1st	86	1st ppFVC (%)
67	ppRV (%)	Diffusion Impaired (≤80% DLCO)	Mild Restriction (71-80% TLC)	1st	78	1st ppRV (%)
67	ppFEV1 (%)	Diffusion Impaired (≤80% DLCO)	Mild Restriction (71-80% TLC)	1st	78	1st ppFEV1 (%)
67	ppFEF 25/75 (%)	Diffusion Impaired (≤80% DLCO)	Mild Restriction (71-80% TLC)	1st	53	1st ppFEF 25/75 (%)
67	ppTLC (%)	Diffusion Impaired (≤80% DLCO)	Mild Restriction (71-80% TLC)	2nd	63	2nd ppTLC (%)
67	ppDLCO (%)	Diffusion Impaired (≤80% DLCO)	Mild Restriction (71-80% TLC)	2nd	71	2nd ppDLCO (%)
67	ppFVC (%)	Diffusion Impaired (≤80% DLCO)	Mild Restriction (71-80% TLC)	2nd	87	2nd ppFVC (%)
67	ppRV (%)	Diffusion Impaired (≤80% DLCO)	Mild Restriction (71-80% TLC)	2nd	42	2nd ppRV (%)
67	ppFEV1 (%)	Diffusion Impaired (≤80% DLCO)	Mild Restriction (71-80% TLC)	2nd	79	2nd ppFEV1 (%)
67	ppFEF 25/75 (%)	Diffusion Impaired (≤80% DLCO)	Mild Restriction (71-80% TLC)	2nd	51	2nd ppFEF 25/75 (%)
67	ppTLC (%)	Diffusion Impaired (≤80% DLCO)	Mild Restriction (71-80% TLC)	3rd	76	3rd ppTLC (%)
67	ppDLCO (%)	Diffusion Impaired (≤80% DLCO)	Mild Restriction (71-80% TLC)	3rd	74	3rd ppDLCO (%)
67	ppFVC (%)	Diffusion Impaired (≤80% DLCO)	Mild Restriction (71-80% TLC)	3rd	92	3rd ppFVC (%)
67	ppRV (%)	Diffusion Impaired (≤80% DLCO)	Mild Restriction (71-80% TLC)	3rd	69	3rd ppRV (%)
67	ppFEV1 (%)	Diffusion Impaired (≤80% DLCO)	Mild Restriction (71-80% TLC)	3rd	89	3rd ppFEV1 (%)
67	ppFEF 25/75 (%)	Diffusion Impaired (≤80% DLCO)	Mild Restriction (71-80% TLC)	3rd	74	3rd ppFEF 25/75 (%)
919	ppTLC (%)	Diffusion Normal (>80% DLCO)	Moderate Restriction (51-70% TLC)	1st	61	1st ppTLC (%)
919	ppDLCO (%)	Diffusion Normal (>80% DLCO)	Moderate Restriction (51-70% TLC)	1st	98	1st ppDLCO (%)
919	ppFVC (%)	Diffusion Normal (>80% DLCO)	Moderate Restriction (51-70% TLC)	1st	83	1st ppFVC (%)
919	ppRV (%)	Diffusion Normal (>80% DLCO)	Moderate Restriction (51-70% TLC)	1st	6	1st ppRV (%)
919	ppFEV1 (%)	Diffusion Normal (>80% DLCO)	Moderate Restriction (51-70% TLC)	1st	84	1st ppFEV1 (%)
919	ppFEF 25/75 (%)	Diffusion Normal (>80% DLCO)	Moderate Restriction (51-70% TLC)	1st	86	1st ppFEF 25/75 (%)
919	ppTLC (%)	Diffusion Normal (>80% DLCO)	Moderate Restriction (51-70% TLC)	2nd	81	2nd ppTLC (%)
919	ppDLCO (%)	Diffusion Normal (>80% DLCO)	Moderate Restriction (51-70% TLC)	2nd	88	2nd ppDLCO (%)
919	ppFVC (%)	Diffusion Normal (>80% DLCO)	Moderate Restriction (51-70% TLC)	2nd	85	2nd ppFVC (%)
919	ppRV (%)	Diffusion Normal (>80% DLCO)	Moderate Restriction (51-70% TLC)	2nd	59	2nd ppRV (%)
919	ppFEV1 (%)	Diffusion Normal (>80% DLCO)	Moderate Restriction (51-70% TLC)	2nd	91	2nd ppFEV1 (%)
919	ppFEF 25/75 (%)	Diffusion Normal (>80% DLCO)	Moderate Restriction (51-70% TLC)	2nd	120	2nd ppFEF 25/75 (%)
21	ppTLC (%)	Diffusion Impaired (≤80% DLCO)	Severe Restriction (≤50% TLC)	1st	50	1st ppTLC (%)
21	ppDLCO (%)	Diffusion Impaired (≤80% DLCO)	Severe Restriction (≤50% TLC)	1st	72	1st ppDLCO (%)
21	ppFVC (%)	Diffusion Impaired (≤80% DLCO)	Severe Restriction (≤50% TLC)	1st	74	1st ppFVC (%)
21	ppFEV1 (%)	Diffusion Impaired (≤80% DLCO)	Severe Restriction (≤50% TLC)	1st	77	1st ppFEV1 (%)
21	ppFEF 25/75 (%)	Diffusion Impaired (≤80% DLCO)	Severe Restriction (≤50% TLC)	1st	83	1st ppFEF 25/75 (%)
841	ppTLC (%)	Diffusion Impaired (≤80% DLCO)	Moderate Restriction (51-70% TLC)	1st	61	1st ppTLC (%)
841	ppDLCO (%)	Diffusion Impaired (≤80% DLCO)	Moderate Restriction (51-70% TLC)	1st	80	1st ppDLCO (%)
841	ppFVC (%)	Diffusion Impaired (≤80% DLCO)	Moderate Restriction (51-70% TLC)	1st	91	1st ppFVC (%)
841	ppRV (%)	Diffusion Impaired (≤80% DLCO)	Moderate Restriction (51-70% TLC)	1st	8	1st ppRV (%)
841	ppFEV1 (%)	Diffusion Impaired (≤80% DLCO)	Moderate Restriction (51-70% TLC)	1st	82	1st ppFEV1 (%)
841	ppFEF 25/75 (%)	Diffusion Impaired (≤80% DLCO)	Moderate Restriction (51-70% TLC)	1st	69	1st ppFEF 25/75 (%)
122	ppTLC (%)	Diffusion Impaired (≤80% DLCO)	No Restriction (>80% TLC)	1st	94	1st ppTLC (%)
122	ppDLCO (%)	Diffusion Impaired (≤80% DLCO)	No Restriction (>80% TLC)	1st	72	1st ppDLCO (%)
122	ppFVC (%)	Diffusion Impaired (≤80% DLCO)	No Restriction (>80% TLC)	1st	93	1st ppFVC (%)
122	ppRV (%)	Diffusion Impaired (≤80% DLCO)	No Restriction (>80% TLC)	1st	75	1st ppRV (%)
122	ppFEV1 (%)	Diffusion Impaired (≤80% DLCO)	No Restriction (>80% TLC)	1st	84	1st ppFEV1 (%)
122	ppFEF 25/75 (%)	Diffusion Impaired (≤80% DLCO)	No Restriction (>80% TLC)	1st	67	1st ppFEF 25/75 (%)
102	ppTLC (%)	Diffusion Normal (>80% DLCO)	Mild Restriction (71-80% TLC)	1st	74	1st ppTLC (%)
102	ppDLCO (%)	Diffusion Normal (>80% DLCO)	Mild Restriction (71-80% TLC)	1st	81	1st ppDLCO (%)
102	ppFVC (%)	Diffusion Normal (>80% DLCO)	Mild Restriction (71-80% TLC)	1st	104	1st ppFVC (%)
102	ppFEV1 (%)	Diffusion Normal (>80% DLCO)	Mild Restriction (71-80% TLC)	1st	101	1st ppFEV1 (%)
102	ppFEF 25/75 (%)	Diffusion Normal (>80% DLCO)	Mild Restriction (71-80% TLC)	1st	92	1st ppFEF 25/75 (%)
55	ppTLC (%)	Diffusion Impaired (≤80% DLCO)	Moderate Restriction (51-70% TLC)	1st	55	1st ppTLC (%)
55	ppDLCO (%)	Diffusion Impaired (≤80% DLCO)	Moderate Restriction (51-70% TLC)	1st	52	1st ppDLCO (%)
55	ppFVC (%)	Diffusion Impaired (≤80% DLCO)	Moderate Restriction (51-70% TLC)	1st	77	1st ppFVC (%)
55	ppRV (%)	Diffusion Impaired (≤80% DLCO)	Moderate Restriction (51-70% TLC)	1st	27	1st ppRV (%)
55	ppFEV1 (%)	Diffusion Impaired (≤80% DLCO)	Moderate Restriction (51-70% TLC)	1st	82	1st ppFEV1 (%)
55	ppFEF 25/75 (%)	Diffusion Impaired (≤80% DLCO)	Moderate Restriction (51-70% TLC)	1st	105	1st ppFEF 25/75 (%)
55	ppTLC (%)	Diffusion Impaired (≤80% DLCO)	Moderate Restriction (51-70% TLC)	2nd	57	2nd ppTLC (%)
55	ppDLCO (%)	Diffusion Impaired (≤80% DLCO)	Moderate Restriction (51-70% TLC)	2nd	57	2nd ppDLCO (%)
55	ppFVC (%)	Diffusion Impaired (≤80% DLCO)	Moderate Restriction (51-70% TLC)	2nd	79	2nd ppFVC (%)
55	ppRV (%)	Diffusion Impaired (≤80% DLCO)	Moderate Restriction (51-70% TLC)	2nd	31	2nd ppRV (%)
55	ppFEV1 (%)	Diffusion Impaired (≤80% DLCO)	Moderate Restriction (51-70% TLC)	2nd	85	2nd ppFEV1 (%)
55	ppFEF 25/75 (%)	Diffusion Impaired (≤80% DLCO)	Moderate Restriction (51-70% TLC)	2nd	108	2nd ppFEF 25/75 (%)
55	ppTLC (%)	Diffusion Impaired (≤80% DLCO)	Moderate Restriction (51-70% TLC)	3rd	59	3rd ppTLC (%)
55	ppDLCO (%)	Diffusion Impaired (≤80% DLCO)	Moderate Restriction (51-70% TLC)	3rd	52	3rd ppDLCO (%)
55	ppFVC (%)	Diffusion Impaired (≤80% DLCO)	Moderate Restriction (51-70% TLC)	3rd	85	3rd ppFVC (%)
55	ppRV (%)	Diffusion Impaired (≤80% DLCO)	Moderate Restriction (51-70% TLC)	3rd	27	3rd ppRV (%)
55	ppFEV1 (%)	Diffusion Impaired (≤80% DLCO)	Moderate Restriction (51-70% TLC)	3rd	90	3rd ppFEV1 (%)
55	ppFEF 25/75 (%)	Diffusion Impaired (≤80% DLCO)	Moderate Restriction (51-70% TLC)	3rd	124	3rd ppFEF 25/75 (%)
61	ppTLC (%)	Diffusion Impaired (≤80% DLCO)	Moderate Restriction (51-70% TLC)	1st	55	1st ppTLC (%)
61	ppDLCO (%)	Diffusion Impaired (≤80% DLCO)	Moderate Restriction (51-70% TLC)	1st	64	1st ppDLCO (%)
61	ppFVC (%)	Diffusion Impaired (≤80% DLCO)	Moderate Restriction (51-70% TLC)	1st	74	1st ppFVC (%)
61	ppRV (%)	Diffusion Impaired (≤80% DLCO)	Moderate Restriction (51-70% TLC)	1st	42	1st ppRV (%)
61	ppFEV1 (%)	Diffusion Impaired (≤80% DLCO)	Moderate Restriction (51-70% TLC)	1st	95	1st ppFEV1 (%)
61	ppFEF 25/75 (%)	Diffusion Impaired (≤80% DLCO)	Moderate Restriction (51-70% TLC)	1st	204	1st ppFEF 25/75 (%)
61	ppTLC (%)	Diffusion Impaired (≤80% DLCO)	Moderate Restriction (51-70% TLC)	2nd	67	2nd ppTLC (%)
61	ppDLCO (%)	Diffusion Impaired (≤80% DLCO)	Moderate Restriction (51-70% TLC)	2nd	79	2nd ppDLCO (%)
61	ppFVC (%)	Diffusion Impaired (≤80% DLCO)	Moderate Restriction (51-70% TLC)	2nd	81	2nd ppFVC (%)
61	ppRV (%)	Diffusion Impaired (≤80% DLCO)	Moderate Restriction (51-70% TLC)	2nd	63	2nd ppRV (%)
61	ppFEV1 (%)	Diffusion Impaired (≤80% DLCO)	Moderate Restriction (51-70% TLC)	2nd	97	2nd ppFEV1 (%)
61	ppFEF 25/75 (%)	Diffusion Impaired (≤80% DLCO)	Moderate Restriction (51-70% TLC)	2nd	200	2nd ppFEF 25/75 (%)
31	ppTLC (%)	Diffusion Normal (>80% DLCO)	No Restriction (>80% TLC)	1st	103	1st ppTLC (%)
31	ppDLCO (%)	Diffusion Normal (>80% DLCO)	No Restriction (>80% TLC)	1st	92	1st ppDLCO (%)
31	ppFVC (%)	Diffusion Normal (>80% DLCO)	No Restriction (>80% TLC)	1st	112	1st ppFVC (%)
31	ppRV (%)	Diffusion Normal (>80% DLCO)	No Restriction (>80% TLC)	1st	66	1st ppRV (%)
31	ppFEV1 (%)	Diffusion Normal (>80% DLCO)	No Restriction (>80% TLC)	1st	115	1st ppFEV1 (%)
31	ppFEF 25/75 (%)	Diffusion Normal (>80% DLCO)	No Restriction (>80% TLC)	1st	119	1st ppFEF 25/75 (%)
99	ppTLC (%)	Diffusion Impaired (≤80% DLCO)	Mild Restriction (71-80% TLC)	1st	77	1st ppTLC (%)
99	ppDLCO (%)	Diffusion Impaired (≤80% DLCO)	Mild Restriction (71-80% TLC)	1st	54	1st ppDLCO (%)
99	ppFVC (%)	Diffusion Impaired (≤80% DLCO)	Mild Restriction (71-80% TLC)	1st	122	1st ppFVC (%)
99	ppRV (%)	Diffusion Impaired (≤80% DLCO)	Mild Restriction (71-80% TLC)	1st	20	1st ppRV (%)
99	ppFEV1 (%)	Diffusion Impaired (≤80% DLCO)	Mild Restriction (71-80% TLC)	1st	127	1st ppFEV1 (%)
99	ppFEF 25/75 (%)	Diffusion Impaired (≤80% DLCO)	Mild Restriction (71-80% TLC)	1st	141	1st ppFEF 25/75 (%)
60	ppTLC (%)	Diffusion Impaired (≤80% DLCO)	Moderate Restriction (51-70% TLC)	1st	70	1st ppTLC (%)
60	ppDLCO (%)	Diffusion Impaired (≤80% DLCO)	Moderate Restriction (51-70% TLC)	1st	63	1st ppDLCO (%)
60	ppFVC (%)	Diffusion Impaired (≤80% DLCO)	Moderate Restriction (51-70% TLC)	1st	69	1st ppFVC (%)
60	ppRV (%)	Diffusion Impaired (≤80% DLCO)	Moderate Restriction (51-70% TLC)	1st	57	1st ppRV (%)
60	ppFEV1 (%)	Diffusion Impaired (≤80% DLCO)	Moderate Restriction (51-70% TLC)	1st	69	1st ppFEV1 (%)
60	ppFEF 25/75 (%)	Diffusion Impaired (≤80% DLCO)	Moderate Restriction (51-70% TLC)	1st	69	1st ppFEF 25/75 (%)
836	ppTLC (%)	Diffusion Impaired (≤80% DLCO)	Moderate Restriction (51-70% TLC)	1st	56	1st ppTLC (%)
836	ppDLCO (%)	Diffusion Impaired (≤80% DLCO)	Moderate Restriction (51-70% TLC)	1st	61	1st ppDLCO (%)
836	ppFVC (%)	Diffusion Impaired (≤80% DLCO)	Moderate Restriction (51-70% TLC)	1st	71	1st ppFVC (%)
836	ppRV (%)	Diffusion Impaired (≤80% DLCO)	Moderate Restriction (51-70% TLC)	1st	44	1st ppRV (%)
836	ppFEV1 (%)	Diffusion Impaired (≤80% DLCO)	Moderate Restriction (51-70% TLC)	1st	71	1st ppFEV1 (%)
836	ppFEF 25/75 (%)	Diffusion Impaired (≤80% DLCO)	Moderate Restriction (51-70% TLC)	1st	59	1st ppFEF 25/75 (%)
836	ppTLC (%)	Diffusion Impaired (≤80% DLCO)	Moderate Restriction (51-70% TLC)	2nd	50	2nd ppTLC (%)
836	ppDLCO (%)	Diffusion Impaired (≤80% DLCO)	Moderate Restriction (51-70% TLC)	2nd	89	2nd ppDLCO (%)
836	ppFVC (%)	Diffusion Impaired (≤80% DLCO)	Moderate Restriction (51-70% TLC)	2nd	74	2nd ppFVC (%)
836	ppFEV1 (%)	Diffusion Impaired (≤80% DLCO)	Moderate Restriction (51-70% TLC)	2nd	69	2nd ppFEV1 (%)
836	ppFEF 25/75 (%)	Diffusion Impaired (≤80% DLCO)	Moderate Restriction (51-70% TLC)	2nd	45	2nd ppFEF 25/75 (%)
812	ppTLC (%)	Diffusion Impaired (≤80% DLCO)	Mild Restriction (71-80% TLC)	1st	80	1st ppTLC (%)
812	ppDLCO (%)	Diffusion Impaired (≤80% DLCO)	Mild Restriction (71-80% TLC)	1st	74	1st ppDLCO (%)
812	ppFVC (%)	Diffusion Impaired (≤80% DLCO)	Mild Restriction (71-80% TLC)	1st	90	1st ppFVC (%)
812	ppRV (%)	Diffusion Impaired (≤80% DLCO)	Mild Restriction (71-80% TLC)	1st	57	1st ppRV (%)
812	ppFEV1 (%)	Diffusion Impaired (≤80% DLCO)	Mild Restriction (71-80% TLC)	1st	92	1st ppFEV1 (%)
812	ppFEF 25/75 (%)	Diffusion Impaired (≤80% DLCO)	Mild Restriction (71-80% TLC)	1st	106	1st ppFEF 25/75 (%)
812	ppFVC (%)	Diffusion Impaired (≤80% DLCO)	Mild Restriction (71-80% TLC)	2nd	98	2nd ppFVC (%)
812	ppFEV1 (%)	Diffusion Impaired (≤80% DLCO)	Mild Restriction (71-80% TLC)	2nd	100	2nd ppFEV1 (%)
812	ppFEF 25/75 (%)	Diffusion Impaired (≤80% DLCO)	Mild Restriction (71-80% TLC)	2nd	107	2nd ppFEF 25/75 (%)
812	ppFVC (%)	Diffusion Impaired (≤80% DLCO)	Mild Restriction (71-80% TLC)	3rd	101	3rd ppFVC (%)
812	ppFEV1 (%)	Diffusion Impaired (≤80% DLCO)	Mild Restriction (71-80% TLC)	3rd	101	3rd ppFEV1 (%)
812	ppFEF 25/75 (%)	Diffusion Impaired (≤80% DLCO)	Mild Restriction (71-80% TLC)	3rd	107	3rd ppFEF 25/75 (%)
33	ppTLC (%)	Diffusion Normal (>80% DLCO)	Mild Restriction (71-80% TLC)	1st	73	1st ppTLC (%)
33	ppDLCO (%)	Diffusion Normal (>80% DLCO)	Mild Restriction (71-80% TLC)	1st	96	1st ppDLCO (%)
33	ppFVC (%)	Diffusion Normal (>80% DLCO)	Mild Restriction (71-80% TLC)	1st	86	1st ppFVC (%)
33	ppRV (%)	Diffusion Normal (>80% DLCO)	Mild Restriction (71-80% TLC)	1st	16	1st ppRV (%)
33	ppFEV1 (%)	Diffusion Normal (>80% DLCO)	Mild Restriction (71-80% TLC)	1st	88	1st ppFEV1 (%)
33	ppFEF 25/75 (%)	Diffusion Normal (>80% DLCO)	Mild Restriction (71-80% TLC)	1st	92	1st ppFEF 25/75 (%)
42	ppTLC (%)	Diffusion Impaired (≤80% DLCO)	Mild Restriction (71-80% TLC)	1st	74	1st ppTLC (%)
42	ppDLCO (%)	Diffusion Impaired (≤80% DLCO)	Mild Restriction (71-80% TLC)	1st	32	1st ppDLCO (%)
42	ppFVC (%)	Diffusion Impaired (≤80% DLCO)	Mild Restriction (71-80% TLC)	1st	67	1st ppFVC (%)
42	ppRV (%)	Diffusion Impaired (≤80% DLCO)	Mild Restriction (71-80% TLC)	1st	81	1st ppRV (%)
42	ppFEV1 (%)	Diffusion Impaired (≤80% DLCO)	Mild Restriction (71-80% TLC)	1st	83	1st ppFEV1 (%)
42	ppFEF 25/75 (%)	Diffusion Impaired (≤80% DLCO)	Mild Restriction (71-80% TLC)	1st	151	1st ppFEF 25/75 (%)
847	ppTLC (%)	Diffusion Impaired (≤80% DLCO)	Severe Restriction (≤50% TLC)	1st	35	1st ppTLC (%)
847	ppDLCO (%)	Diffusion Impaired (≤80% DLCO)	Severe Restriction (≤50% TLC)	1st	47	1st ppDLCO (%)
847	ppFVC (%)	Diffusion Impaired (≤80% DLCO)	Severe Restriction (≤50% TLC)	1st	47	1st ppFVC (%)
847	ppRV (%)	Diffusion Impaired (≤80% DLCO)	Severe Restriction (≤50% TLC)	1st	31	1st ppRV (%)
847	ppFEV1 (%)	Diffusion Impaired (≤80% DLCO)	Severe Restriction (≤50% TLC)	1st	50	1st ppFEV1 (%)
847	ppFEF 25/75 (%)	Diffusion Impaired (≤80% DLCO)	Severe Restriction (≤50% TLC)	1st	73	1st ppFEF 25/75 (%)
53	ppTLC (%)	Diffusion Impaired (≤80% DLCO)	Moderate Restriction (51-70% TLC)	1st	56	1st ppTLC (%)
53	ppDLCO (%)	Diffusion Impaired (≤80% DLCO)	Moderate Restriction (51-70% TLC)	1st	63	1st ppDLCO (%)
53	ppFVC (%)	Diffusion Impaired (≤80% DLCO)	Moderate Restriction (51-70% TLC)	1st	60	1st ppFVC (%)
53	ppRV (%)	Diffusion Impaired (≤80% DLCO)	Moderate Restriction (51-70% TLC)	1st	39	1st ppRV (%)
53	ppFEV1 (%)	Diffusion Impaired (≤80% DLCO)	Moderate Restriction (51-70% TLC)	1st	59	1st ppFEV1 (%)
53	ppFEF 25/75 (%)	Diffusion Impaired (≤80% DLCO)	Moderate Restriction (51-70% TLC)	1st	65	1st ppFEF 25/75 (%)
53	ppTLC (%)	Diffusion Impaired (≤80% DLCO)	Moderate Restriction (51-70% TLC)	2nd	64	2nd ppTLC (%)
53	ppDLCO (%)	Diffusion Impaired (≤80% DLCO)	Moderate Restriction (51-70% TLC)	2nd	63	2nd ppDLCO (%)
53	ppFVC (%)	Diffusion Impaired (≤80% DLCO)	Moderate Restriction (51-70% TLC)	2nd	64	2nd ppFVC (%)
53	ppRV (%)	Diffusion Impaired (≤80% DLCO)	Moderate Restriction (51-70% TLC)	2nd	48	2nd ppRV (%)
53	ppFEV1 (%)	Diffusion Impaired (≤80% DLCO)	Moderate Restriction (51-70% TLC)	2nd	67	2nd ppFEV1 (%)
53	ppFEF 25/75 (%)	Diffusion Impaired (≤80% DLCO)	Moderate Restriction (51-70% TLC)	2nd	80	2nd ppFEF 25/75 (%)
120	ppTLC (%)	Diffusion Normal (>80% DLCO)	Mild Restriction (71-80% TLC)	1st	74	1st ppTLC (%)
120	ppDLCO (%)	Diffusion Normal (>80% DLCO)	Mild Restriction (71-80% TLC)	1st	109	1st ppDLCO (%)
120	ppFVC (%)	Diffusion Normal (>80% DLCO)	Mild Restriction (71-80% TLC)	1st	66	1st ppFVC (%)
120	ppRV (%)	Diffusion Normal (>80% DLCO)	Mild Restriction (71-80% TLC)	1st	73	1st ppRV (%)
120	ppFEV1 (%)	Diffusion Normal (>80% DLCO)	Mild Restriction (71-80% TLC)	1st	57	1st ppFEV1 (%)
120	ppFEF 25/75 (%)	Diffusion Normal (>80% DLCO)	Mild Restriction (71-80% TLC)	1st	39	1st ppFEF 25/75 (%)
120	ppDLCO (%)	Diffusion Normal (>80% DLCO)	Mild Restriction (71-80% TLC)	2nd	89	2nd ppDLCO (%)
120	ppFVC (%)	Diffusion Normal (>80% DLCO)	Mild Restriction (71-80% TLC)	2nd	71	2nd ppFVC (%)
120	ppFEV1 (%)	Diffusion Normal (>80% DLCO)	Mild Restriction (71-80% TLC)	2nd	64	2nd ppFEV1 (%)
120	ppFEF 25/75 (%)	Diffusion Normal (>80% DLCO)	Mild Restriction (71-80% TLC)	2nd	42	2nd ppFEF 25/75 (%)
120	ppTLC (%)	Diffusion Normal (>80% DLCO)	Mild Restriction (71-80% TLC)	3rd	63	3rd ppTLC (%)
120	ppDLCO (%)	Diffusion Normal (>80% DLCO)	Mild Restriction (71-80% TLC)	3rd	85	3rd ppDLCO (%)
120	ppFVC (%)	Diffusion Normal (>80% DLCO)	Mild Restriction (71-80% TLC)	3rd	54	3rd ppFVC (%)
120	ppRV (%)	Diffusion Normal (>80% DLCO)	Mild Restriction (71-80% TLC)	3rd	73	3rd ppRV (%)
120	ppFEV1 (%)	Diffusion Normal (>80% DLCO)	Mild Restriction (71-80% TLC)	3rd	46	3rd ppFEV1 (%)
120	ppFEF 25/75 (%)	Diffusion Normal (>80% DLCO)	Mild Restriction (71-80% TLC)	3rd	27	3rd ppFEF 25/75 (%)
79	ppTLC (%)	Diffusion Normal (>80% DLCO)	No Restriction (>80% TLC)	1st	94	1st ppTLC (%)
79	ppDLCO (%)	Diffusion Normal (>80% DLCO)	No Restriction (>80% TLC)	1st	95	1st ppDLCO (%)
79	ppFVC (%)	Diffusion Normal (>80% DLCO)	No Restriction (>80% TLC)	1st	92	1st ppFVC (%)
79	ppRV (%)	Diffusion Normal (>80% DLCO)	No Restriction (>80% TLC)	1st	78	1st ppRV (%)
79	ppFEV1 (%)	Diffusion Normal (>80% DLCO)	No Restriction (>80% TLC)	1st	87	1st ppFEV1 (%)
79	ppFEF 25/75 (%)	Diffusion Normal (>80% DLCO)	No Restriction (>80% TLC)	1st	70	1st ppFEF 25/75 (%)
45	ppTLC (%)	Diffusion Impaired (≤80% DLCO)	Severe Restriction (≤50% TLC)	1st	45	1st ppTLC (%)
45	ppDLCO (%)	Diffusion Impaired (≤80% DLCO)	Severe Restriction (≤50% TLC)	1st	71	1st ppDLCO (%)
45	ppFVC (%)	Diffusion Impaired (≤80% DLCO)	Severe Restriction (≤50% TLC)	1st	41	1st ppFVC (%)
45	ppRV (%)	Diffusion Impaired (≤80% DLCO)	Severe Restriction (≤50% TLC)	1st	39	1st ppRV (%)
45	ppFEV1 (%)	Diffusion Impaired (≤80% DLCO)	Severe Restriction (≤50% TLC)	1st	46	1st ppFEV1 (%)
45	ppFEF 25/75 (%)	Diffusion Impaired (≤80% DLCO)	Severe Restriction (≤50% TLC)	1st	82	1st ppFEF 25/75 (%)
909	ppTLC (%)	Diffusion Impaired (≤80% DLCO)	Moderate Restriction (51-70% TLC)	1st	64	1st ppTLC (%)
909	ppDLCO (%)	Diffusion Impaired (≤80% DLCO)	Moderate Restriction (51-70% TLC)	1st	54	1st ppDLCO (%)
909	ppFVC (%)	Diffusion Impaired (≤80% DLCO)	Moderate Restriction (51-70% TLC)	1st	63	1st ppFVC (%)
909	ppRV (%)	Diffusion Impaired (≤80% DLCO)	Moderate Restriction (51-70% TLC)	1st	54	1st ppRV (%)
909	ppFEV1 (%)	Diffusion Impaired (≤80% DLCO)	Moderate Restriction (51-70% TLC)	1st	61	1st ppFEV1 (%)
909	ppFEF 25/75 (%)	Diffusion Impaired (≤80% DLCO)	Moderate Restriction (51-70% TLC)	1st	51	1st ppFEF 25/75 (%)
101	ppTLC (%)	Diffusion Impaired (≤80% DLCO)	Severe Restriction (≤50% TLC)	1st	47	1st ppTLC (%)
101	ppDLCO (%)	Diffusion Impaired (≤80% DLCO)	Severe Restriction (≤50% TLC)	1st	44	1st ppDLCO (%)
101	ppFVC (%)	Diffusion Impaired (≤80% DLCO)	Severe Restriction (≤50% TLC)	1st	52	1st ppFVC (%)
101	ppRV (%)	Diffusion Impaired (≤80% DLCO)	Severe Restriction (≤50% TLC)	1st	37	1st ppRV (%)
101	ppFEV1 (%)	Diffusion Impaired (≤80% DLCO)	Severe Restriction (≤50% TLC)	1st	49	1st ppFEV1 (%)
101	ppFEF 25/75 (%)	Diffusion Impaired (≤80% DLCO)	Severe Restriction (≤50% TLC)	1st	40	1st ppFEF 25/75 (%)
101	ppDLCO (%)	Diffusion Impaired (≤80% DLCO)	Severe Restriction (≤50% TLC)	2nd	68	2nd ppDLCO (%)
101	ppFVC (%)	Diffusion Impaired (≤80% DLCO)	Severe Restriction (≤50% TLC)	2nd	69	2nd ppFVC (%)
101	ppFEV1 (%)	Diffusion Impaired (≤80% DLCO)	Severe Restriction (≤50% TLC)	2nd	73	2nd ppFEV1 (%)
101	ppFEF 25/75 (%)	Diffusion Impaired (≤80% DLCO)	Severe Restriction (≤50% TLC)	2nd	97	2nd ppFEF 25/75 (%)
101	ppTLC (%)	Diffusion Impaired (≤80% DLCO)	Severe Restriction (≤50% TLC)	3rd	69	3rd ppTLC (%)
101	ppDLCO (%)	Diffusion Impaired (≤80% DLCO)	Severe Restriction (≤50% TLC)	3rd	64	3rd ppDLCO (%)
101	ppFVC (%)	Diffusion Impaired (≤80% DLCO)	Severe Restriction (≤50% TLC)	3rd	75	3rd ppFVC (%)
101	ppRV (%)	Diffusion Impaired (≤80% DLCO)	Severe Restriction (≤50% TLC)	3rd	46	3rd ppRV (%)
101	ppFEV1 (%)	Diffusion Impaired (≤80% DLCO)	Severe Restriction (≤50% TLC)	3rd	81	3rd ppFEV1 (%)
101	ppFEF 25/75 (%)	Diffusion Impaired (≤80% DLCO)	Severe Restriction (≤50% TLC)	3rd	122	3rd ppFEF 25/75 (%)
826	ppTLC (%)	Diffusion Impaired (≤80% DLCO)	Moderate Restriction (51-70% TLC)	1st	55	1st ppTLC (%)
826	ppDLCO (%)	Diffusion Impaired (≤80% DLCO)	Moderate Restriction (51-70% TLC)	1st	57	1st ppDLCO (%)
826	ppFVC (%)	Diffusion Impaired (≤80% DLCO)	Moderate Restriction (51-70% TLC)	1st	54	1st ppFVC (%)
826	ppRV (%)	Diffusion Impaired (≤80% DLCO)	Moderate Restriction (51-70% TLC)	1st	56	1st ppRV (%)
826	ppFEV1 (%)	Diffusion Impaired (≤80% DLCO)	Moderate Restriction (51-70% TLC)	1st	50	1st ppFEV1 (%)
826	ppFEF 25/75 (%)	Diffusion Impaired (≤80% DLCO)	Moderate Restriction (51-70% TLC)	1st	35	1st ppFEF 25/75 (%)
826	ppTLC (%)	Diffusion Impaired (≤80% DLCO)	Moderate Restriction (51-70% TLC)	2nd	62	2nd ppTLC (%)
826	ppDLCO (%)	Diffusion Impaired (≤80% DLCO)	Moderate Restriction (51-70% TLC)	2nd	77	2nd ppDLCO (%)
826	ppFVC (%)	Diffusion Impaired (≤80% DLCO)	Moderate Restriction (51-70% TLC)	2nd	72	2nd ppFVC (%)
826	ppRV (%)	Diffusion Impaired (≤80% DLCO)	Moderate Restriction (51-70% TLC)	2nd	35	2nd ppRV (%)
826	ppFEV1 (%)	Diffusion Impaired (≤80% DLCO)	Moderate Restriction (51-70% TLC)	2nd	78	2nd ppFEV1 (%)
826	ppFEF 25/75 (%)	Diffusion Impaired (≤80% DLCO)	Moderate Restriction (51-70% TLC)	2nd	118	2nd ppFEF 25/75 (%)
826	ppTLC (%)	Diffusion Impaired (≤80% DLCO)	Moderate Restriction (51-70% TLC)	3rd	53	3rd ppTLC (%)
826	ppDLCO (%)	Diffusion Impaired (≤80% DLCO)	Moderate Restriction (51-70% TLC)	3rd	70	3rd ppDLCO (%)
826	ppFVC (%)	Diffusion Impaired (≤80% DLCO)	Moderate Restriction (51-70% TLC)	3rd	67	3rd ppFVC (%)
826	ppRV (%)	Diffusion Impaired (≤80% DLCO)	Moderate Restriction (51-70% TLC)	3rd	33	3rd ppRV (%)
826	ppFEV1 (%)	Diffusion Impaired (≤80% DLCO)	Moderate Restriction (51-70% TLC)	3rd	73	3rd ppFEV1 (%)
826	ppFEF 25/75 (%)	Diffusion Impaired (≤80% DLCO)	Moderate Restriction (51-70% TLC)	3rd	127	3rd ppFEF 25/75 (%)
115	ppTLC (%)	Diffusion Normal (>80% DLCO)	Moderate Restriction (51-70% TLC)	1st	65	1st ppTLC (%)
115	ppDLCO (%)	Diffusion Normal (>80% DLCO)	Moderate Restriction (51-70% TLC)	1st	84	1st ppDLCO (%)
115	ppFVC (%)	Diffusion Normal (>80% DLCO)	Moderate Restriction (51-70% TLC)	1st	72	1st ppFVC (%)
115	ppRV (%)	Diffusion Normal (>80% DLCO)	Moderate Restriction (51-70% TLC)	1st	47	1st ppRV (%)
115	ppFEV1 (%)	Diffusion Normal (>80% DLCO)	Moderate Restriction (51-70% TLC)	1st	79	1st ppFEV1 (%)
115	ppFEF 25/75 (%)	Diffusion Normal (>80% DLCO)	Moderate Restriction (51-70% TLC)	1st	118	1st ppFEF 25/75 (%)
3	ppTLC (%)	Diffusion Impaired (≤80% DLCO)	Moderate Restriction (51-70% TLC)	1st	55	1st ppTLC (%)
3	ppDLCO (%)	Diffusion Impaired (≤80% DLCO)	Moderate Restriction (51-70% TLC)	1st	34	1st ppDLCO (%)
3	ppFVC (%)	Diffusion Impaired (≤80% DLCO)	Moderate Restriction (51-70% TLC)	1st	67	1st ppFVC (%)
3	ppRV (%)	Diffusion Impaired (≤80% DLCO)	Moderate Restriction (51-70% TLC)	1st	31	1st ppRV (%)
3	ppFEV1 (%)	Diffusion Impaired (≤80% DLCO)	Moderate Restriction (51-70% TLC)	1st	58	1st ppFEV1 (%)
3	ppFEF 25/75 (%)	Diffusion Impaired (≤80% DLCO)	Moderate Restriction (51-70% TLC)	1st	33	1st ppFEF 25/75 (%)
3	ppFVC (%)	Diffusion Impaired (≤80% DLCO)	Moderate Restriction (51-70% TLC)	2nd	65	2nd ppFVC (%)
3	ppFEV1 (%)	Diffusion Impaired (≤80% DLCO)	Moderate Restriction (51-70% TLC)	2nd	52	2nd ppFEV1 (%)
3	ppFEF 25/75 (%)	Diffusion Impaired (≤80% DLCO)	Moderate Restriction (51-70% TLC)	2nd	28	2nd ppFEF 25/75 (%)
89	ppTLC (%)	Diffusion Normal (>80% DLCO)	No Restriction (>80% TLC)	1st	94	1st ppTLC (%)
89	ppDLCO (%)	Diffusion Normal (>80% DLCO)	No Restriction (>80% TLC)	1st	93	1st ppDLCO (%)
89	ppFVC (%)	Diffusion Normal (>80% DLCO)	No Restriction (>80% TLC)	1st	96	1st ppFVC (%)
89	ppRV (%)	Diffusion Normal (>80% DLCO)	No Restriction (>80% TLC)	1st	76	1st ppRV (%)
89	ppFEV1 (%)	Diffusion Normal (>80% DLCO)	No Restriction (>80% TLC)	1st	103	1st ppFEV1 (%)
89	ppFEF 25/75 (%)	Diffusion Normal (>80% DLCO)	No Restriction (>80% TLC)	1st	118	1st ppFEF 25/75 (%)
89	ppTLC (%)	Diffusion Normal (>80% DLCO)	No Restriction (>80% TLC)	2nd	88	2nd ppTLC (%)
89	ppDLCO (%)	Diffusion Normal (>80% DLCO)	No Restriction (>80% TLC)	2nd	107	2nd ppDLCO (%)
89	ppFVC (%)	Diffusion Normal (>80% DLCO)	No Restriction (>80% TLC)	2nd	98	2nd ppFVC (%)
89	ppRV (%)	Diffusion Normal (>80% DLCO)	No Restriction (>80% TLC)	2nd	67	2nd ppRV (%)
89	ppFEV1 (%)	Diffusion Normal (>80% DLCO)	No Restriction (>80% TLC)	2nd	101	2nd ppFEV1 (%)
89	ppFEF 25/75 (%)	Diffusion Normal (>80% DLCO)	No Restriction (>80% TLC)	2nd	107	2nd ppFEF 25/75 (%)
89	ppTLC (%)	Diffusion Normal (>80% DLCO)	No Restriction (>80% TLC)	3rd	90	3rd ppTLC (%)
89	ppDLCO (%)	Diffusion Normal (>80% DLCO)	No Restriction (>80% TLC)	3rd	78	3rd ppDLCO (%)
89	ppFVC (%)	Diffusion Normal (>80% DLCO)	No Restriction (>80% TLC)	3rd	99	3rd ppFVC (%)
89	ppRV (%)	Diffusion Normal (>80% DLCO)	No Restriction (>80% TLC)	3rd	71	3rd ppRV (%)
89	ppFEV1 (%)	Diffusion Normal (>80% DLCO)	No Restriction (>80% TLC)	3rd	106	3rd ppFEV1 (%)
89	ppFEF 25/75 (%)	Diffusion Normal (>80% DLCO)	No Restriction (>80% TLC)	3rd	146	3rd ppFEF 25/75 (%)
876	ppTLC (%)	Diffusion Impaired (≤80% DLCO)	Moderate Restriction (51-70% TLC)	1st	69	1st ppTLC (%)
876	ppDLCO (%)	Diffusion Impaired (≤80% DLCO)	Moderate Restriction (51-70% TLC)	1st	69	1st ppDLCO (%)
876	ppFVC (%)	Diffusion Impaired (≤80% DLCO)	Moderate Restriction (51-70% TLC)	1st	71	1st ppFVC (%)
876	ppRV (%)	Diffusion Impaired (≤80% DLCO)	Moderate Restriction (51-70% TLC)	1st	47	1st ppRV (%)
876	ppFEV1 (%)	Diffusion Impaired (≤80% DLCO)	Moderate Restriction (51-70% TLC)	1st	76	1st ppFEV1 (%)
876	ppFEF 25/75 (%)	Diffusion Impaired (≤80% DLCO)	Moderate Restriction (51-70% TLC)	1st	102	1st ppFEF 25/75 (%)
876	ppTLC (%)	Diffusion Impaired (≤80% DLCO)	Moderate Restriction (51-70% TLC)	2nd	62	2nd ppTLC (%)
876	ppDLCO (%)	Diffusion Impaired (≤80% DLCO)	Moderate Restriction (51-70% TLC)	2nd	73	2nd ppDLCO (%)
876	ppFVC (%)	Diffusion Impaired (≤80% DLCO)	Moderate Restriction (51-70% TLC)	2nd	87	2nd ppFVC (%)
876	ppRV (%)	Diffusion Impaired (≤80% DLCO)	Moderate Restriction (51-70% TLC)	2nd	38	2nd ppRV (%)
876	ppFEV1 (%)	Diffusion Impaired (≤80% DLCO)	Moderate Restriction (51-70% TLC)	2nd	97	2nd ppFEV1 (%)
876	ppFEF 25/75 (%)	Diffusion Impaired (≤80% DLCO)	Moderate Restriction (51-70% TLC)	2nd	137	2nd ppFEF 25/75 (%)
853	ppTLC (%)	Diffusion Impaired (≤80% DLCO)	Severe Restriction (≤50% TLC)	1st	45	1st ppTLC (%)
853	ppDLCO (%)	Diffusion Impaired (≤80% DLCO)	Severe Restriction (≤50% TLC)	1st	53	1st ppDLCO (%)
853	ppFVC (%)	Diffusion Impaired (≤80% DLCO)	Severe Restriction (≤50% TLC)	1st	44	1st ppFVC (%)
853	ppRV (%)	Diffusion Impaired (≤80% DLCO)	Severe Restriction (≤50% TLC)	1st	42	1st ppRV (%)
853	ppFEV1 (%)	Diffusion Impaired (≤80% DLCO)	Severe Restriction (≤50% TLC)	1st	41	1st ppFEV1 (%)
853	ppFEF 25/75 (%)	Diffusion Impaired (≤80% DLCO)	Severe Restriction (≤50% TLC)	1st	30	1st ppFEF 25/75 (%)
853	ppTLC (%)	Diffusion Impaired (≤80% DLCO)	Severe Restriction (≤50% TLC)	2nd	53	2nd ppTLC (%)
853	ppDLCO (%)	Diffusion Impaired (≤80% DLCO)	Severe Restriction (≤50% TLC)	2nd	59	2nd ppDLCO (%)
853	ppFVC (%)	Diffusion Impaired (≤80% DLCO)	Severe Restriction (≤50% TLC)	2nd	48	2nd ppFVC (%)
853	ppRV (%)	Diffusion Impaired (≤80% DLCO)	Severe Restriction (≤50% TLC)	2nd	52	2nd ppRV (%)
853	ppFEV1 (%)	Diffusion Impaired (≤80% DLCO)	Severe Restriction (≤50% TLC)	2nd	44	2nd ppFEV1 (%)
853	ppFEF 25/75 (%)	Diffusion Impaired (≤80% DLCO)	Severe Restriction (≤50% TLC)	2nd	31	2nd ppFEF 25/75 (%)
81	ppTLC (%)	Diffusion Normal (>80% DLCO)	Mild Restriction (71-80% TLC)	1st	72	1st ppTLC (%)
81	ppDLCO (%)	Diffusion Normal (>80% DLCO)	Mild Restriction (71-80% TLC)	1st	83	1st ppDLCO (%)
81	ppFVC (%)	Diffusion Normal (>80% DLCO)	Mild Restriction (71-80% TLC)	1st	89	1st ppFVC (%)
81	ppRV (%)	Diffusion Normal (>80% DLCO)	Mild Restriction (71-80% TLC)	1st	34	1st ppRV (%)
81	ppFEV1 (%)	Diffusion Normal (>80% DLCO)	Mild Restriction (71-80% TLC)	1st	95	1st ppFEV1 (%)
81	ppFEF 25/75 (%)	Diffusion Normal (>80% DLCO)	Mild Restriction (71-80% TLC)	1st	122	1st ppFEF 25/75 (%)
7	ppTLC (%)	Diffusion Impaired (≤80% DLCO)	Moderate Restriction (51-70% TLC)	1st	64	1st ppTLC (%)
7	ppDLCO (%)	Diffusion Impaired (≤80% DLCO)	Moderate Restriction (51-70% TLC)	1st	67	1st ppDLCO (%)
7	ppFVC (%)	Diffusion Impaired (≤80% DLCO)	Moderate Restriction (51-70% TLC)	1st	67	1st ppFVC (%)
7	ppRV (%)	Diffusion Impaired (≤80% DLCO)	Moderate Restriction (51-70% TLC)	1st	47	1st ppRV (%)
7	ppFEV1 (%)	Diffusion Impaired (≤80% DLCO)	Moderate Restriction (51-70% TLC)	1st	56	1st ppFEV1 (%)
7	ppFEF 25/75 (%)	Diffusion Impaired (≤80% DLCO)	Moderate Restriction (51-70% TLC)	1st	34	1st ppFEF 25/75 (%)
7	ppTLC (%)	Diffusion Impaired (≤80% DLCO)	Moderate Restriction (51-70% TLC)	2nd	54	2nd ppTLC (%)
7	ppDLCO (%)	Diffusion Impaired (≤80% DLCO)	Moderate Restriction (51-70% TLC)	2nd	46	2nd ppDLCO (%)
7	ppFVC (%)	Diffusion Impaired (≤80% DLCO)	Moderate Restriction (51-70% TLC)	2nd	63	2nd ppFVC (%)
7	ppRV (%)	Diffusion Impaired (≤80% DLCO)	Moderate Restriction (51-70% TLC)	2nd	25	2nd ppRV (%)
7	ppFEV1 (%)	Diffusion Impaired (≤80% DLCO)	Moderate Restriction (51-70% TLC)	2nd	54	2nd ppFEV1 (%)
7	ppFEF 25/75 (%)	Diffusion Impaired (≤80% DLCO)	Moderate Restriction (51-70% TLC)	2nd	32	2nd ppFEF 25/75 (%)
47	ppTLC (%)	Diffusion Impaired (≤80% DLCO)	Mild Restriction (71-80% TLC)	1st	79	1st ppTLC (%)
47	ppDLCO (%)	Diffusion Impaired (≤80% DLCO)	Mild Restriction (71-80% TLC)	1st	73	1st ppDLCO (%)
47	ppFVC (%)	Diffusion Impaired (≤80% DLCO)	Mild Restriction (71-80% TLC)	1st	94	1st ppFVC (%)
47	ppRV (%)	Diffusion Impaired (≤80% DLCO)	Mild Restriction (71-80% TLC)	1st	57	1st ppRV (%)
47	ppFEV1 (%)	Diffusion Impaired (≤80% DLCO)	Mild Restriction (71-80% TLC)	1st	113	1st ppFEV1 (%)
47	ppFEF 25/75 (%)	Diffusion Impaired (≤80% DLCO)	Mild Restriction (71-80% TLC)	1st	149	1st ppFEF 25/75 (%)
58	ppTLC (%)	Diffusion Normal (>80% DLCO)	No Restriction (>80% TLC)	1st	87	1st ppTLC (%)
58	ppDLCO (%)	Diffusion Normal (>80% DLCO)	No Restriction (>80% TLC)	1st	89	1st ppDLCO (%)
58	ppFVC (%)	Diffusion Normal (>80% DLCO)	No Restriction (>80% TLC)	1st	121	1st ppFVC (%)
58	ppRV (%)	Diffusion Normal (>80% DLCO)	No Restriction (>80% TLC)	1st	38	1st ppRV (%)
58	ppFEV1 (%)	Diffusion Normal (>80% DLCO)	No Restriction (>80% TLC)	1st	112	1st ppFEV1 (%)
58	ppFEF 25/75 (%)	Diffusion Normal (>80% DLCO)	No Restriction (>80% TLC)	1st	83	1st ppFEF 25/75 (%)
57	ppTLC (%)	Diffusion Normal (>80% DLCO)	Mild Restriction (71-80% TLC)	1st	79	1st ppTLC (%)
57	ppDLCO (%)	Diffusion Normal (>80% DLCO)	Mild Restriction (71-80% TLC)	1st	85	1st ppDLCO (%)
57	ppFVC (%)	Diffusion Normal (>80% DLCO)	Mild Restriction (71-80% TLC)	1st	87	1st ppFVC (%)
57	ppRV (%)	Diffusion Normal (>80% DLCO)	Mild Restriction (71-80% TLC)	1st	69	1st ppRV (%)
57	ppFEV1 (%)	Diffusion Normal (>80% DLCO)	Mild Restriction (71-80% TLC)	1st	86	1st ppFEV1 (%)
57	ppFEF 25/75 (%)	Diffusion Normal (>80% DLCO)	Mild Restriction (71-80% TLC)	1st	77	1st ppFEF 25/75 (%)
57	ppTLC (%)	Diffusion Normal (>80% DLCO)	Mild Restriction (71-80% TLC)	2nd	75	2nd ppTLC (%)
57	ppDLCO (%)	Diffusion Normal (>80% DLCO)	Mild Restriction (71-80% TLC)	2nd	79	2nd ppDLCO (%)
57	ppFVC (%)	Diffusion Normal (>80% DLCO)	Mild Restriction (71-80% TLC)	2nd	92	2nd ppFVC (%)
57	ppRV (%)	Diffusion Normal (>80% DLCO)	Mild Restriction (71-80% TLC)	2nd	54	2nd ppRV (%)
57	ppFEV1 (%)	Diffusion Normal (>80% DLCO)	Mild Restriction (71-80% TLC)	2nd	84	2nd ppFEV1 (%)
57	ppFEF 25/75 (%)	Diffusion Normal (>80% DLCO)	Mild Restriction (71-80% TLC)	2nd	56	2nd ppFEF 25/75 (%)
75	ppTLC (%)	Diffusion Impaired (≤80% DLCO)	Mild Restriction (71-80% TLC)	1st	76	1st ppTLC (%)
75	ppDLCO (%)	Diffusion Impaired (≤80% DLCO)	Mild Restriction (71-80% TLC)	1st	61	1st ppDLCO (%)
75	ppFVC (%)	Diffusion Impaired (≤80% DLCO)	Mild Restriction (71-80% TLC)	1st	64	1st ppFVC (%)
75	ppRV (%)	Diffusion Impaired (≤80% DLCO)	Mild Restriction (71-80% TLC)	1st	83	1st ppRV (%)
75	ppFEV1 (%)	Diffusion Impaired (≤80% DLCO)	Mild Restriction (71-80% TLC)	1st	52	1st ppFEV1 (%)
75	ppFEF 25/75 (%)	Diffusion Impaired (≤80% DLCO)	Mild Restriction (71-80% TLC)	1st	29	1st ppFEF 25/75 (%)
75	ppTLC (%)	Diffusion Impaired (≤80% DLCO)	Mild Restriction (71-80% TLC)	2nd	81	2nd ppTLC (%)
75	ppDLCO (%)	Diffusion Impaired (≤80% DLCO)	Mild Restriction (71-80% TLC)	2nd	68	2nd ppDLCO (%)
75	ppFVC (%)	Diffusion Impaired (≤80% DLCO)	Mild Restriction (71-80% TLC)	2nd	68	2nd ppFVC (%)
75	ppRV (%)	Diffusion Impaired (≤80% DLCO)	Mild Restriction (71-80% TLC)	2nd	91	2nd ppRV (%)
75	ppFEV1 (%)	Diffusion Impaired (≤80% DLCO)	Mild Restriction (71-80% TLC)	2nd	55	2nd ppFEV1 (%)
75	ppFEF 25/75 (%)	Diffusion Impaired (≤80% DLCO)	Mild Restriction (71-80% TLC)	2nd	32	2nd ppFEF 25/75 (%)
843	ppTLC (%)	Diffusion Impaired (≤80% DLCO)	Severe Restriction (≤50% TLC)	1st	36	1st ppTLC (%)
843	ppDLCO (%)	Diffusion Impaired (≤80% DLCO)	Severe Restriction (≤50% TLC)	1st	41	1st ppDLCO (%)
843	ppFVC (%)	Diffusion Impaired (≤80% DLCO)	Severe Restriction (≤50% TLC)	1st	42	1st ppFVC (%)
843	ppRV (%)	Diffusion Impaired (≤80% DLCO)	Severe Restriction (≤50% TLC)	1st	23	1st ppRV (%)
843	ppFEV1 (%)	Diffusion Impaired (≤80% DLCO)	Severe Restriction (≤50% TLC)	1st	46	1st ppFEV1 (%)
843	ppFEF 25/75 (%)	Diffusion Impaired (≤80% DLCO)	Severe Restriction (≤50% TLC)	1st	61	1st ppFEF 25/75 (%)
843	ppDLCO (%)	Diffusion Impaired (≤80% DLCO)	Severe Restriction (≤50% TLC)	2nd	50	2nd ppDLCO (%)
843	ppFVC (%)	Diffusion Impaired (≤80% DLCO)	Severe Restriction (≤50% TLC)	2nd	42	2nd ppFVC (%)
843	ppFEV1 (%)	Diffusion Impaired (≤80% DLCO)	Severe Restriction (≤50% TLC)	2nd	36	2nd ppFEV1 (%)
843	ppFEF 25/75 (%)	Diffusion Impaired (≤80% DLCO)	Severe Restriction (≤50% TLC)	2nd	21	2nd ppFEF 25/75 (%)
843	ppDLCO (%)	Diffusion Impaired (≤80% DLCO)	Severe Restriction (≤50% TLC)	3rd	41	3rd ppDLCO (%)
843	ppFVC (%)	Diffusion Impaired (≤80% DLCO)	Severe Restriction (≤50% TLC)	3rd	40	3rd ppFVC (%)
843	ppFEV1 (%)	Diffusion Impaired (≤80% DLCO)	Severe Restriction (≤50% TLC)	3rd	38	3rd ppFEV1 (%)
843	ppFEF 25/75 (%)	Diffusion Impaired (≤80% DLCO)	Severe Restriction (≤50% TLC)	3rd	32	3rd ppFEF 25/75 (%)
844	ppTLC (%)	Diffusion Impaired (≤80% DLCO)	Mild Restriction (71-80% TLC)	1st	71	1st ppTLC (%)
844	ppDLCO (%)	Diffusion Impaired (≤80% DLCO)	Mild Restriction (71-80% TLC)	1st	62	1st ppDLCO (%)
844	ppFVC (%)	Diffusion Impaired (≤80% DLCO)	Mild Restriction (71-80% TLC)	1st	98	1st ppFVC (%)
844	ppRV (%)	Diffusion Impaired (≤80% DLCO)	Mild Restriction (71-80% TLC)	1st	49	1st ppRV (%)
844	ppFEV1 (%)	Diffusion Impaired (≤80% DLCO)	Mild Restriction (71-80% TLC)	1st	96	1st ppFEV1 (%)
844	ppFEF 25/75 (%)	Diffusion Impaired (≤80% DLCO)	Mild Restriction (71-80% TLC)	1st	91	1st ppFEF 25/75 (%)
77	ppTLC (%)	Diffusion Normal (>80% DLCO)	Moderate Restriction (51-70% TLC)	1st	60	1st ppTLC (%)
77	ppDLCO (%)	Diffusion Normal (>80% DLCO)	Moderate Restriction (51-70% TLC)	1st	86	1st ppDLCO (%)
77	ppFVC (%)	Diffusion Normal (>80% DLCO)	Moderate Restriction (51-70% TLC)	1st	76	1st ppFVC (%)
77	ppRV (%)	Diffusion Normal (>80% DLCO)	Moderate Restriction (51-70% TLC)	1st	35	1st ppRV (%)
77	ppFEV1 (%)	Diffusion Normal (>80% DLCO)	Moderate Restriction (51-70% TLC)	1st	81	1st ppFEV1 (%)
77	ppFEF 25/75 (%)	Diffusion Normal (>80% DLCO)	Moderate Restriction (51-70% TLC)	1st	106	1st ppFEF 25/75 (%)
103	ppTLC (%)	Diffusion Impaired (≤80% DLCO)	Moderate Restriction (51-70% TLC)	1st	57	1st ppTLC (%)
103	ppDLCO (%)	Diffusion Impaired (≤80% DLCO)	Moderate Restriction (51-70% TLC)	1st	69	1st ppDLCO (%)
103	ppFVC (%)	Diffusion Impaired (≤80% DLCO)	Moderate Restriction (51-70% TLC)	1st	63	1st ppFVC (%)
103	ppRV (%)	Diffusion Impaired (≤80% DLCO)	Moderate Restriction (51-70% TLC)	1st	55	1st ppRV (%)
103	ppFEV1 (%)	Diffusion Impaired (≤80% DLCO)	Moderate Restriction (51-70% TLC)	1st	76	1st ppFEV1 (%)
103	ppFEF 25/75 (%)	Diffusion Impaired (≤80% DLCO)	Moderate Restriction (51-70% TLC)	1st	106	1st ppFEF 25/75 (%)
859	ppTLC (%)	Diffusion Impaired (≤80% DLCO)	Moderate Restriction (51-70% TLC)	1st	66	1st ppTLC (%)
859	ppDLCO (%)	Diffusion Impaired (≤80% DLCO)	Moderate Restriction (51-70% TLC)	1st	74	1st ppDLCO (%)
859	ppFVC (%)	Diffusion Impaired (≤80% DLCO)	Moderate Restriction (51-70% TLC)	1st	76	1st ppFVC (%)
859	ppRV (%)	Diffusion Impaired (≤80% DLCO)	Moderate Restriction (51-70% TLC)	1st	67	1st ppRV (%)
859	ppFEV1 (%)	Diffusion Impaired (≤80% DLCO)	Moderate Restriction (51-70% TLC)	1st	75	1st ppFEV1 (%)
859	ppFEF 25/75 (%)	Diffusion Impaired (≤80% DLCO)	Moderate Restriction (51-70% TLC)	1st	69	1st ppFEF 25/75 (%)
859	ppTLC (%)	Diffusion Impaired (≤80% DLCO)	Moderate Restriction (51-70% TLC)	2nd	77	2nd ppTLC (%)
859	ppDLCO (%)	Diffusion Impaired (≤80% DLCO)	Moderate Restriction (51-70% TLC)	2nd	84	2nd ppDLCO (%)
859	ppFVC (%)	Diffusion Impaired (≤80% DLCO)	Moderate Restriction (51-70% TLC)	2nd	101	2nd ppFVC (%)
859	ppRV (%)	Diffusion Impaired (≤80% DLCO)	Moderate Restriction (51-70% TLC)	2nd	63	2nd ppRV (%)
859	ppFEV1 (%)	Diffusion Impaired (≤80% DLCO)	Moderate Restriction (51-70% TLC)	2nd	111	2nd ppFEV1 (%)
859	ppFEF 25/75 (%)	Diffusion Impaired (≤80% DLCO)	Moderate Restriction (51-70% TLC)	2nd	182	2nd ppFEF 25/75 (%)
859	ppTLC (%)	Diffusion Impaired (≤80% DLCO)	Moderate Restriction (51-70% TLC)	3rd	56	3rd ppTLC (%)
859	ppDLCO (%)	Diffusion Impaired (≤80% DLCO)	Moderate Restriction (51-70% TLC)	3rd	79	3rd ppDLCO (%)
859	ppFVC (%)	Diffusion Impaired (≤80% DLCO)	Moderate Restriction (51-70% TLC)	3rd	85	3rd ppFVC (%)
859	ppRV (%)	Diffusion Impaired (≤80% DLCO)	Moderate Restriction (51-70% TLC)	3rd	20	3rd ppRV (%)
859	ppFEV1 (%)	Diffusion Impaired (≤80% DLCO)	Moderate Restriction (51-70% TLC)	3rd	103	3rd ppFEV1 (%)
859	ppFEF 25/75 (%)	Diffusion Impaired (≤80% DLCO)	Moderate Restriction (51-70% TLC)	3rd	211	3rd ppFEF 25/75 (%)
41	ppTLC (%)	Diffusion Normal (>80% DLCO)	Moderate Restriction (51-70% TLC)	1st	68	1st ppTLC (%)
41	ppDLCO (%)	Diffusion Normal (>80% DLCO)	Moderate Restriction (51-70% TLC)	1st	103	1st ppDLCO (%)
41	ppFVC (%)	Diffusion Normal (>80% DLCO)	Moderate Restriction (51-70% TLC)	1st	83	1st ppFVC (%)
41	ppRV (%)	Diffusion Normal (>80% DLCO)	Moderate Restriction (51-70% TLC)	1st	60	1st ppRV (%)
41	ppFEV1 (%)	Diffusion Normal (>80% DLCO)	Moderate Restriction (51-70% TLC)	1st	94	1st ppFEV1 (%)
41	ppFEF 25/75 (%)	Diffusion Normal (>80% DLCO)	Moderate Restriction (51-70% TLC)	1st	137	1st ppFEF 25/75 (%)
41	ppTLC (%)	Diffusion Normal (>80% DLCO)	Moderate Restriction (51-70% TLC)	2nd	67	2nd ppTLC (%)
41	ppDLCO (%)	Diffusion Normal (>80% DLCO)	Moderate Restriction (51-70% TLC)	2nd	98	2nd ppDLCO (%)
41	ppFVC (%)	Diffusion Normal (>80% DLCO)	Moderate Restriction (51-70% TLC)	2nd	88	2nd ppFVC (%)
41	ppRV (%)	Diffusion Normal (>80% DLCO)	Moderate Restriction (51-70% TLC)	2nd	43	2nd ppRV (%)
41	ppFEV1 (%)	Diffusion Normal (>80% DLCO)	Moderate Restriction (51-70% TLC)	2nd	93	2nd ppFEV1 (%)
41	ppFEF 25/75 (%)	Diffusion Normal (>80% DLCO)	Moderate Restriction (51-70% TLC)	2nd	111	2nd ppFEF 25/75 (%)
41	ppTLC (%)	Diffusion Normal (>80% DLCO)	Moderate Restriction (51-70% TLC)	3rd	62	3rd ppTLC (%)
41	ppDLCO (%)	Diffusion Normal (>80% DLCO)	Moderate Restriction (51-70% TLC)	3rd	100	3rd ppDLCO (%)
41	ppFVC (%)	Diffusion Normal (>80% DLCO)	Moderate Restriction (51-70% TLC)	3rd	91	3rd ppFVC (%)
41	ppRV (%)	Diffusion Normal (>80% DLCO)	Moderate Restriction (51-70% TLC)	3rd	36	3rd ppRV (%)
41	ppFEV1 (%)	Diffusion Normal (>80% DLCO)	Moderate Restriction (51-70% TLC)	3rd	95	3rd ppFEV1 (%)
41	ppFEF 25/75 (%)	Diffusion Normal (>80% DLCO)	Moderate Restriction (51-70% TLC)	3rd	125	3rd ppFEF 25/75 (%)
855	ppTLC (%)	Diffusion Impaired (≤80% DLCO)	Severe Restriction (≤50% TLC)	1st	48	1st ppTLC (%)
855	ppDLCO (%)	Diffusion Impaired (≤80% DLCO)	Severe Restriction (≤50% TLC)	1st	75	1st ppDLCO (%)
855	ppFVC (%)	Diffusion Impaired (≤80% DLCO)	Severe Restriction (≤50% TLC)	1st	72	1st ppFVC (%)
855	ppRV (%)	Diffusion Impaired (≤80% DLCO)	Severe Restriction (≤50% TLC)	1st	11	1st ppRV (%)
855	ppFEV1 (%)	Diffusion Impaired (≤80% DLCO)	Severe Restriction (≤50% TLC)	1st	74	1st ppFEV1 (%)
855	ppFEF 25/75 (%)	Diffusion Impaired (≤80% DLCO)	Severe Restriction (≤50% TLC)	1st	93	1st ppFEF 25/75 (%)
855	ppTLC (%)	Diffusion Impaired (≤80% DLCO)	Severe Restriction (≤50% TLC)	2nd	62	2nd ppTLC (%)
855	ppDLCO (%)	Diffusion Impaired (≤80% DLCO)	Severe Restriction (≤50% TLC)	2nd	74	2nd ppDLCO (%)
855	ppFVC (%)	Diffusion Impaired (≤80% DLCO)	Severe Restriction (≤50% TLC)	2nd	77	2nd ppFVC (%)
855	ppRV (%)	Diffusion Impaired (≤80% DLCO)	Severe Restriction (≤50% TLC)	2nd	44	2nd ppRV (%)
855	ppFEV1 (%)	Diffusion Impaired (≤80% DLCO)	Severe Restriction (≤50% TLC)	2nd	79	2nd ppFEV1 (%)
855	ppFEF 25/75 (%)	Diffusion Impaired (≤80% DLCO)	Severe Restriction (≤50% TLC)	2nd	102	2nd ppFEF 25/75 (%)
874	ppTLC (%)	Diffusion Impaired (≤80% DLCO)	Moderate Restriction (51-70% TLC)	1st	57	1st ppTLC (%)
874	ppDLCO (%)	Diffusion Impaired (≤80% DLCO)	Moderate Restriction (51-70% TLC)	1st	61	1st ppDLCO (%)
874	ppFVC (%)	Diffusion Impaired (≤80% DLCO)	Moderate Restriction (51-70% TLC)	1st	76	1st ppFVC (%)
874	ppRV (%)	Diffusion Impaired (≤80% DLCO)	Moderate Restriction (51-70% TLC)	1st	34	1st ppRV (%)
874	ppFEV1 (%)	Diffusion Impaired (≤80% DLCO)	Moderate Restriction (51-70% TLC)	1st	79	1st ppFEV1 (%)
874	ppFEF 25/75 (%)	Diffusion Impaired (≤80% DLCO)	Moderate Restriction (51-70% TLC)	1st	91	1st ppFEF 25/75 (%)
929	ppTLC (%)	Diffusion Impaired (≤80% DLCO)	Severe Restriction (≤50% TLC)	1st	46	1st ppTLC (%)
929	ppDLCO (%)	Diffusion Impaired (≤80% DLCO)	Severe Restriction (≤50% TLC)	1st	62	1st ppDLCO (%)
929	ppFVC (%)	Diffusion Impaired (≤80% DLCO)	Severe Restriction (≤50% TLC)	1st	69	1st ppFVC (%)
929	ppRV (%)	Diffusion Impaired (≤80% DLCO)	Severe Restriction (≤50% TLC)	1st	19	1st ppRV (%)
929	ppFEV1 (%)	Diffusion Impaired (≤80% DLCO)	Severe Restriction (≤50% TLC)	1st	75	1st ppFEV1 (%)
929	ppFEF 25/75 (%)	Diffusion Impaired (≤80% DLCO)	Severe Restriction (≤50% TLC)	1st	96	1st ppFEF 25/75 (%)
46	ppTLC (%)	Diffusion Impaired (≤80% DLCO)	Severe Restriction (≤50% TLC)	1st	49	1st ppTLC (%)
46	ppDLCO (%)	Diffusion Impaired (≤80% DLCO)	Severe Restriction (≤50% TLC)	1st	69	1st ppDLCO (%)
46	ppFVC (%)	Diffusion Impaired (≤80% DLCO)	Severe Restriction (≤50% TLC)	1st	66	1st ppFVC (%)
46	ppRV (%)	Diffusion Impaired (≤80% DLCO)	Severe Restriction (≤50% TLC)	1st	7	1st ppRV (%)
46	ppFEV1 (%)	Diffusion Impaired (≤80% DLCO)	Severe Restriction (≤50% TLC)	1st	70	1st ppFEV1 (%)
46	ppFEF 25/75 (%)	Diffusion Impaired (≤80% DLCO)	Severe Restriction (≤50% TLC)	1st	99	1st ppFEF 25/75 (%)
46	ppTLC (%)	Diffusion Impaired (≤80% DLCO)	Severe Restriction (≤50% TLC)	2nd	57	2nd ppTLC (%)
[truncated: 6,478 more rows]

## Sheet: Figure 3A-D
deidentified_patient_id	baseline_disease_diffusion_capacity_state_binary	baseline_disease_restriction_state	measurement_time	lung_ct_pathology	present
24	Diffusion Impaired (≤80% DLCO)	Moderate Restriction (51-70% TLC)	Baseline Long COVID Clinic Visit	Ground Glass Opacities	1
24	Diffusion Impaired (≤80% DLCO)	Moderate Restriction (51-70% TLC)	Baseline Long COVID Clinic Visit	Reticulations	1
24	Diffusion Impaired (≤80% DLCO)	Moderate Restriction (51-70% TLC)	Baseline Long COVID Clinic Visit	Other Fibrosis	0
24	Diffusion Impaired (≤80% DLCO)	Moderate Restriction (51-70% TLC)	Baseline Long COVID Clinic Visit	Bronchiectasis	0
24	Diffusion Impaired (≤80% DLCO)	Moderate Restriction (51-70% TLC)	Baseline Long COVID Clinic Visit	Consolidation	0
24	Diffusion Impaired (≤80% DLCO)	Moderate Restriction (51-70% TLC)	Baseline Long COVID Clinic Visit	Emphysema	0
228	Diffusion Impaired (≤80% DLCO)	Severe Restriction (≤50% TLC)	Baseline Long COVID Clinic Visit	Ground Glass Opacities	1
228	Diffusion Impaired (≤80% DLCO)	Severe Restriction (≤50% TLC)	Baseline Long COVID Clinic Visit	Reticulations	0
228	Diffusion Impaired (≤80% DLCO)	Severe Restriction (≤50% TLC)	Baseline Long COVID Clinic Visit	Other Fibrosis	0
228	Diffusion Impaired (≤80% DLCO)	Severe Restriction (≤50% TLC)	Baseline Long COVID Clinic Visit	Bronchiectasis	1
228	Diffusion Impaired (≤80% DLCO)	Severe Restriction (≤50% TLC)	Baseline Long COVID Clinic Visit	Consolidation	0
228	Diffusion Impaired (≤80% DLCO)	Severe Restriction (≤50% TLC)	Baseline Long COVID Clinic Visit	Emphysema	1
10	Diffusion Impaired (≤80% DLCO)	Moderate Restriction (51-70% TLC)	Baseline Long COVID Clinic Visit	Ground Glass Opacities	0
10	Diffusion Impaired (≤80% DLCO)	Moderate Restriction (51-70% TLC)	Baseline Long COVID Clinic Visit	Reticulations	0
10	Diffusion Impaired (≤80% DLCO)	Moderate Restriction (51-70% TLC)	Baseline Long COVID Clinic Visit	Other Fibrosis	0
10	Diffusion Impaired (≤80% DLCO)	Moderate Restriction (51-70% TLC)	Baseline Long COVID Clinic Visit	Bronchiectasis	0
10	Diffusion Impaired (≤80% DLCO)	Moderate Restriction (51-70% TLC)	Baseline Long COVID Clinic Visit	Consolidation	0
10	Diffusion Impaired (≤80% DLCO)	Moderate Restriction (51-70% TLC)	Baseline Long COVID Clinic Visit	Emphysema	0
33	Diffusion Impaired (≤80% DLCO)	Moderate Restriction (51-70% TLC)	Baseline Long COVID Clinic Visit	Ground Glass Opacities	1
33	Diffusion Impaired (≤80% DLCO)	Moderate Restriction (51-70% TLC)	Baseline Long COVID Clinic Visit	Reticulations	1
33	Diffusion Impaired (≤80% DLCO)	Moderate Restriction (51-70% TLC)	Baseline Long COVID Clinic Visit	Other Fibrosis	1
33	Diffusion Impaired (≤80% DLCO)	Moderate Restriction (51-70% TLC)	Baseline Long COVID Clinic Visit	Bronchiectasis	1
33	Diffusion Impaired (≤80% DLCO)	Moderate Restriction (51-70% TLC)	Baseline Long COVID Clinic Visit	Consolidation	0
33	Diffusion Impaired (≤80% DLCO)	Moderate Restriction (51-70% TLC)	Baseline Long COVID Clinic Visit	Emphysema	0
2	Diffusion Impaired (≤80% DLCO)	Severe Restriction (≤50% TLC)	Baseline Long COVID Clinic Visit	Ground Glass Opacities	1
2	Diffusion Impaired (≤80% DLCO)	Severe Restriction (≤50% TLC)	Baseline Long COVID Clinic Visit	Reticulations	1
2	Diffusion Impaired (≤80% DLCO)	Severe Restriction (≤50% TLC)	Baseline Long COVID Clinic Visit	Other Fibrosis	0
2	Diffusion Impaired (≤80% DLCO)	Severe Restriction (≤50% TLC)	Baseline Long COVID Clinic Visit	Bronchiectasis	1
2	Diffusion Impaired (≤80% DLCO)	Severe Restriction (≤50% TLC)	Baseline Long COVID Clinic Visit	Consolidation	0
2	Diffusion Impaired (≤80% DLCO)	Severe Restriction (≤50% TLC)	Baseline Long COVID Clinic Visit	Emphysema	0
243	Diffusion Impaired (≤80% DLCO)	Severe Restriction (≤50% TLC)	Baseline Long COVID Clinic Visit	Ground Glass Opacities	1
243	Diffusion Impaired (≤80% DLCO)	Severe Restriction (≤50% TLC)	Baseline Long COVID Clinic Visit	Reticulations	1
243	Diffusion Impaired (≤80% DLCO)	Severe Restriction (≤50% TLC)	Baseline Long COVID Clinic Visit	Other Fibrosis	1
243	Diffusion Impaired (≤80% DLCO)	Severe Restriction (≤50% TLC)	Baseline Long COVID Clinic Visit	Bronchiectasis	1
243	Diffusion Impaired (≤80% DLCO)	Severe Restriction (≤50% TLC)	Baseline Long COVID Clinic Visit	Consolidation	0
243	Diffusion Impaired (≤80% DLCO)	Severe Restriction (≤50% TLC)	Baseline Long COVID Clinic Visit	Emphysema	0
11	Diffusion Impaired (≤80% DLCO)	Moderate Restriction (51-70% TLC)	Baseline Long COVID Clinic Visit	Ground Glass Opacities	1
11	Diffusion Impaired (≤80% DLCO)	Moderate Restriction (51-70% TLC)	Baseline Long COVID Clinic Visit	Reticulations	1
11	Diffusion Impaired (≤80% DLCO)	Moderate Restriction (51-70% TLC)	Baseline Long COVID Clinic Visit	Other Fibrosis	0
11	Diffusion Impaired (≤80% DLCO)	Moderate Restriction (51-70% TLC)	Baseline Long COVID Clinic Visit	Bronchiectasis	0
11	Diffusion Impaired (≤80% DLCO)	Moderate Restriction (51-70% TLC)	Baseline Long COVID Clinic Visit	Consolidation	0
11	Diffusion Impaired (≤80% DLCO)	Moderate Restriction (51-70% TLC)	Baseline Long COVID Clinic Visit	Emphysema	0
209	Diffusion Impaired (≤80% DLCO)	Severe Restriction (≤50% TLC)	Baseline Long COVID Clinic Visit	Ground Glass Opacities	1
209	Diffusion Impaired (≤80% DLCO)	Severe Restriction (≤50% TLC)	Baseline Long COVID Clinic Visit	Reticulations	1
209	Diffusion Impaired (≤80% DLCO)	Severe Restriction (≤50% TLC)	Baseline Long COVID Clinic Visit	Other Fibrosis	1
209	Diffusion Impaired (≤80% DLCO)	Severe Restriction (≤50% TLC)	Baseline Long COVID Clinic Visit	Bronchiectasis	1
209	Diffusion Impaired (≤80% DLCO)	Severe Restriction (≤50% TLC)	Baseline Long COVID Clinic Visit	Consolidation	0
209	Diffusion Impaired (≤80% DLCO)	Severe Restriction (≤50% TLC)	Baseline Long COVID Clinic Visit	Emphysema	0
226	Diffusion Impaired (≤80% DLCO)	Severe Restriction (≤50% TLC)	Baseline Long COVID Clinic Visit	Ground Glass Opacities	1
226	Diffusion Impaired (≤80% DLCO)	Severe Restriction (≤50% TLC)	Baseline Long COVID Clinic Visit	Reticulations	1
226	Diffusion Impaired (≤80% DLCO)	Severe Restriction (≤50% TLC)	Baseline Long COVID Clinic Visit	Other Fibrosis	1
226	Diffusion Impaired (≤80% DLCO)	Severe Restriction (≤50% TLC)	Baseline Long COVID Clinic Visit	Bronchiectasis	1
226	Diffusion Impaired (≤80% DLCO)	Severe Restriction (≤50% TLC)	Baseline Long COVID Clinic Visit	Consolidation	0
226	Diffusion Impaired (≤80% DLCO)	Severe Restriction (≤50% TLC)	Baseline Long COVID Clinic Visit	Emphysema	0
29	Diffusion Impaired (≤80% DLCO)	Moderate Restriction (51-70% TLC)	Baseline Long COVID Clinic Visit	Ground Glass Opacities	0
29	Diffusion Impaired (≤80% DLCO)	Moderate Restriction (51-70% TLC)	Baseline Long COVID Clinic Visit	Reticulations	0
29	Diffusion Impaired (≤80% DLCO)	Moderate Restriction (51-70% TLC)	Baseline Long COVID Clinic Visit	Other Fibrosis	0
29	Diffusion Impaired (≤80% DLCO)	Moderate Restriction (51-70% TLC)	Baseline Long COVID Clinic Visit	Bronchiectasis	0
29	Diffusion Impaired (≤80% DLCO)	Moderate Restriction (51-70% TLC)	Baseline Long COVID Clinic Visit	Consolidation	0
29	Diffusion Impaired (≤80% DLCO)	Moderate Restriction (51-70% TLC)	Baseline Long COVID Clinic Visit	Emphysema	0
8	Diffusion Impaired (≤80% DLCO)	Moderate Restriction (51-70% TLC)	Baseline Long COVID Clinic Visit	Ground Glass Opacities	1
8	Diffusion Impaired (≤80% DLCO)	Moderate Restriction (51-70% TLC)	Baseline Long COVID Clinic Visit	Reticulations	1
8	Diffusion Impaired (≤80% DLCO)	Moderate Restriction (51-70% TLC)	Baseline Long COVID Clinic Visit	Other Fibrosis	0
8	Diffusion Impaired (≤80% DLCO)	Moderate Restriction (51-70% TLC)	Baseline Long COVID Clinic Visit	Bronchiectasis	0
8	Diffusion Impaired (≤80% DLCO)	Moderate Restriction (51-70% TLC)	Baseline Long COVID Clinic Visit	Consolidation	1
8	Diffusion Impaired (≤80% DLCO)	Moderate Restriction (51-70% TLC)	Baseline Long COVID Clinic Visit	Emphysema	1
208	Diffusion Impaired (≤80% DLCO)	Mild Restriction (71-80% TLC)	Baseline Long COVID Clinic Visit	Ground Glass Opacities	1
208	Diffusion Impaired (≤80% DLCO)	Mild Restriction (71-80% TLC)	Baseline Long COVID Clinic Visit	Reticulations	1
208	Diffusion Impaired (≤80% DLCO)	Mild Restriction (71-80% TLC)	Baseline Long COVID Clinic Visit	Other Fibrosis	0
208	Diffusion Impaired (≤80% DLCO)	Mild Restriction (71-80% TLC)	Baseline Long COVID Clinic Visit	Bronchiectasis	1
208	Diffusion Impaired (≤80% DLCO)	Mild Restriction (71-80% TLC)	Baseline Long COVID Clinic Visit	Consolidation	0
208	Diffusion Impaired (≤80% DLCO)	Mild Restriction (71-80% TLC)	Baseline Long COVID Clinic Visit	Emphysema	0
14	Diffusion Impaired (≤80% DLCO)	Severe Restriction (≤50% TLC)	Baseline Long COVID Clinic Visit	Ground Glass Opacities	1
14	Diffusion Impaired (≤80% DLCO)	Severe Restriction (≤50% TLC)	Baseline Long COVID Clinic Visit	Reticulations	1
14	Diffusion Impaired (≤80% DLCO)	Severe Restriction (≤50% TLC)	Baseline Long COVID Clinic Visit	Other Fibrosis	1
14	Diffusion Impaired (≤80% DLCO)	Severe Restriction (≤50% TLC)	Baseline Long COVID Clinic Visit	Bronchiectasis	1
14	Diffusion Impaired (≤80% DLCO)	Severe Restriction (≤50% TLC)	Baseline Long COVID Clinic Visit	Consolidation	1
14	Diffusion Impaired (≤80% DLCO)	Severe Restriction (≤50% TLC)	Baseline Long COVID Clinic Visit	Emphysema	0
210	Diffusion Impaired (≤80% DLCO)	Severe Restriction (≤50% TLC)	Baseline Long COVID Clinic Visit	Ground Glass Opacities	0
210	Diffusion Impaired (≤80% DLCO)	Severe Restriction (≤50% TLC)	Baseline Long COVID Clinic Visit	Reticulations	0
210	Diffusion Impaired (≤80% DLCO)	Severe Restriction (≤50% TLC)	Baseline Long COVID Clinic Visit	Other Fibrosis	0
210	Diffusion Impaired (≤80% DLCO)	Severe Restriction (≤50% TLC)	Baseline Long COVID Clinic Visit	Bronchiectasis	0
210	Diffusion Impaired (≤80% DLCO)	Severe Restriction (≤50% TLC)	Baseline Long COVID Clinic Visit	Consolidation	0
210	Diffusion Impaired (≤80% DLCO)	Severe Restriction (≤50% TLC)	Baseline Long COVID Clinic Visit	Emphysema	0
241	Diffusion Impaired (≤80% DLCO)	Severe Restriction (≤50% TLC)	Baseline Long COVID Clinic Visit	Ground Glass Opacities	0
241	Diffusion Impaired (≤80% DLCO)	Severe Restriction (≤50% TLC)	Baseline Long COVID Clinic Visit	Reticulations	0
241	Diffusion Impaired (≤80% DLCO)	Severe Restriction (≤50% TLC)	Baseline Long COVID Clinic Visit	Other Fibrosis	0
241	Diffusion Impaired (≤80% DLCO)	Severe Restriction (≤50% TLC)	Baseline Long COVID Clinic Visit	Bronchiectasis	0
241	Diffusion Impaired (≤80% DLCO)	Severe Restriction (≤50% TLC)	Baseline Long COVID Clinic Visit	Consolidation	0
241	Diffusion Impaired (≤80% DLCO)	Severe Restriction (≤50% TLC)	Baseline Long COVID Clinic Visit	Emphysema	0
225	Diffusion Impaired (≤80% DLCO)	Severe Restriction (≤50% TLC)	Baseline Long COVID Clinic Visit	Ground Glass Opacities	1
225	Diffusion Impaired (≤80% DLCO)	Severe Restriction (≤50% TLC)	Baseline Long COVID Clinic Visit	Reticulations	1
225	Diffusion Impaired (≤80% DLCO)	Severe Restriction (≤50% TLC)	Baseline Long COVID Clinic Visit	Other Fibrosis	1
225	Diffusion Impaired (≤80% DLCO)	Severe Restriction (≤50% TLC)	Baseline Long COVID Clinic Visit	Bronchiectasis	1
225	Diffusion Impaired (≤80% DLCO)	Severe Restriction (≤50% TLC)	Baseline Long COVID Clinic Visit	Consolidation	1
225	Diffusion Impaired (≤80% DLCO)	Severe Restriction (≤50% TLC)	Baseline Long COVID Clinic Visit	Emphysema	0
7	Diffusion Impaired (≤80% DLCO)	Mild Restriction (71-80% TLC)	Baseline Long COVID Clinic Visit	Ground Glass Opacities	1
7	Diffusion Impaired (≤80% DLCO)	Mild Restriction (71-80% TLC)	Baseline Long COVID Clinic Visit	Reticulations	1
7	Diffusion Impaired (≤80% DLCO)	Mild Restriction (71-80% TLC)	Baseline Long COVID Clinic Visit	Other Fibrosis	1
7	Diffusion Impaired (≤80% DLCO)	Mild Restriction (71-80% TLC)	Baseline Long COVID Clinic Visit	Bronchiectasis	1
7	Diffusion Impaired (≤80% DLCO)	Mild Restriction (71-80% TLC)	Baseline Long COVID Clinic Visit	Consolidation	0
7	Diffusion Impaired (≤80% DLCO)	Mild Restriction (71-80% TLC)	Baseline Long COVID Clinic Visit	Emphysema	0
244	Diffusion Impaired (≤80% DLCO)	Severe Restriction (≤50% TLC)	Baseline Long COVID Clinic Visit	Ground Glass Opacities	1
244	Diffusion Impaired (≤80% DLCO)	Severe Restriction (≤50% TLC)	Baseline Long COVID Clinic Visit	Reticulations	1
244	Diffusion Impaired (≤80% DLCO)	Severe Restriction (≤50% TLC)	Baseline Long COVID Clinic Visit	Other Fibrosis	1
244	Diffusion Impaired (≤80% DLCO)	Severe Restriction (≤50% TLC)	Baseline Long COVID Clinic Visit	Bronchiectasis	1
244	Diffusion Impaired (≤80% DLCO)	Severe Restriction (≤50% TLC)	Baseline Long COVID Clinic Visit	Consolidation	0
244	Diffusion Impaired (≤80% DLCO)	Severe Restriction (≤50% TLC)	Baseline Long COVID Clinic Visit	Emphysema	0
236	Diffusion Impaired (≤80% DLCO)	Severe Restriction (≤50% TLC)	Baseline Long COVID Clinic Visit	Ground Glass Opacities	1
236	Diffusion Impaired (≤80% DLCO)	Severe Restriction (≤50% TLC)	Baseline Long COVID Clinic Visit	Reticulations	0
236	Diffusion Impaired (≤80% DLCO)	Severe Restriction (≤50% TLC)	Baseline Long COVID Clinic Visit	Other Fibrosis	0
236	Diffusion Impaired (≤80% DLCO)	Severe Restriction (≤50% TLC)	Baseline Long COVID Clinic Visit	Bronchiectasis	0
236	Diffusion Impaired (≤80% DLCO)	Severe Restriction (≤50% TLC)	Baseline Long COVID Clinic Visit	Consolidation	0
236	Diffusion Impaired (≤80% DLCO)	Severe Restriction (≤50% TLC)	Baseline Long COVID Clinic Visit	Emphysema	1
32	Diffusion Impaired (≤80% DLCO)	Moderate Restriction (51-70% TLC)	Baseline Long COVID Clinic Visit	Ground Glass Opacities	0
32	Diffusion Impaired (≤80% DLCO)	Moderate Restriction (51-70% TLC)	Baseline Long COVID Clinic Visit	Reticulations	0
32	Diffusion Impaired (≤80% DLCO)	Moderate Restriction (51-70% TLC)	Baseline Long COVID Clinic Visit	Other Fibrosis	0
32	Diffusion Impaired (≤80% DLCO)	Moderate Restriction (51-70% TLC)	Baseline Long COVID Clinic Visit	Bronchiectasis	0
32	Diffusion Impaired (≤80% DLCO)	Moderate Restriction (51-70% TLC)	Baseline Long COVID Clinic Visit	Consolidation	0
32	Diffusion Impaired (≤80% DLCO)	Moderate Restriction (51-70% TLC)	Baseline Long COVID Clinic Visit	Emphysema	1
25	Diffusion Impaired (≤80% DLCO)	Severe Restriction (≤50% TLC)	Baseline Long COVID Clinic Visit	Ground Glass Opacities	1
25	Diffusion Impaired (≤80% DLCO)	Severe Restriction (≤50% TLC)	Baseline Long COVID Clinic Visit	Reticulations	1
25	Diffusion Impaired (≤80% DLCO)	Severe Restriction (≤50% TLC)	Baseline Long COVID Clinic Visit	Other Fibrosis	1
25	Diffusion Impaired (≤80% DLCO)	Severe Restriction (≤50% TLC)	Baseline Long COVID Clinic Visit	Bronchiectasis	1
25	Diffusion Impaired (≤80% DLCO)	Severe Restriction (≤50% TLC)	Baseline Long COVID Clinic Visit	Consolidation	0
25	Diffusion Impaired (≤80% DLCO)	Severe Restriction (≤50% TLC)	Baseline Long COVID Clinic Visit	Emphysema	1
207	Diffusion Impaired (≤80% DLCO)	Moderate Restriction (51-70% TLC)	Baseline Long COVID Clinic Visit	Ground Glass Opacities	1
207	Diffusion Impaired (≤80% DLCO)	Moderate Restriction (51-70% TLC)	Baseline Long COVID Clinic Visit	Reticulations	1
207	Diffusion Impaired (≤80% DLCO)	Moderate Restriction (51-70% TLC)	Baseline Long COVID Clinic Visit	Other Fibrosis	1
207	Diffusion Impaired (≤80% DLCO)	Moderate Restriction (51-70% TLC)	Baseline Long COVID Clinic Visit	Bronchiectasis	0
207	Diffusion Impaired (≤80% DLCO)	Moderate Restriction (51-70% TLC)	Baseline Long COVID Clinic Visit	Consolidation	0
207	Diffusion Impaired (≤80% DLCO)	Moderate Restriction (51-70% TLC)	Baseline Long COVID Clinic Visit	Emphysema	0
224	Diffusion Impaired (≤80% DLCO)	Moderate Restriction (51-70% TLC)	Baseline Long COVID Clinic Visit	Ground Glass Opacities	1
224	Diffusion Impaired (≤80% DLCO)	Moderate Restriction (51-70% TLC)	Baseline Long COVID Clinic Visit	Reticulations	1
224	Diffusion Impaired (≤80% DLCO)	Moderate Restriction (51-70% TLC)	Baseline Long COVID Clinic Visit	Other Fibrosis	1
224	Diffusion Impaired (≤80% DLCO)	Moderate Restriction (51-70% TLC)	Baseline Long COVID Clinic Visit	Bronchiectasis	1
224	Diffusion Impaired (≤80% DLCO)	Moderate Restriction (51-70% TLC)	Baseline Long COVID Clinic Visit	Consolidation	0
224	Diffusion Impaired (≤80% DLCO)	Moderate Restriction (51-70% TLC)	Baseline Long COVID Clinic Visit	Emphysema	0
38	Diffusion Impaired (≤80% DLCO)	Mild Restriction (71-80% TLC)	Baseline Long COVID Clinic Visit	Ground Glass Opacities	1
38	Diffusion Impaired (≤80% DLCO)	Mild Restriction (71-80% TLC)	Baseline Long COVID Clinic Visit	Reticulations	0
38	Diffusion Impaired (≤80% DLCO)	Mild Restriction (71-80% TLC)	Baseline Long COVID Clinic Visit	Other Fibrosis	0
38	Diffusion Impaired (≤80% DLCO)	Mild Restriction (71-80% TLC)	Baseline Long COVID Clinic Visit	Bronchiectasis	0
38	Diffusion Impaired (≤80% DLCO)	Mild Restriction (71-80% TLC)	Baseline Long COVID Clinic Visit	Consolidation	1
38	Diffusion Impaired (≤80% DLCO)	Mild Restriction (71-80% TLC)	Baseline Long COVID Clinic Visit	Emphysema	0
39	Diffusion Impaired (≤80% DLCO)	Severe Restriction (≤50% TLC)	Baseline Long COVID Clinic Visit	Ground Glass Opacities	1
39	Diffusion Impaired (≤80% DLCO)	Severe Restriction (≤50% TLC)	Baseline Long COVID Clinic Visit	Reticulations	1
39	Diffusion Impaired (≤80% DLCO)	Severe Restriction (≤50% TLC)	Baseline Long COVID Clinic Visit	Other Fibrosis	1
39	Diffusion Impaired (≤80% DLCO)	Severe Restriction (≤50% TLC)	Baseline Long COVID Clinic Visit	Bronchiectasis	1
39	Diffusion Impaired (≤80% DLCO)	Severe Restriction (≤50% TLC)	Baseline Long COVID Clinic Visit	Consolidation	0
39	Diffusion Impaired (≤80% DLCO)	Severe Restriction (≤50% TLC)	Baseline Long COVID Clinic Visit	Emphysema	0
41	Diffusion Impaired (≤80% DLCO)	No Restriction (>80% TLC)	Baseline Long COVID Clinic Visit	Ground Glass Opacities	1
41	Diffusion Impaired (≤80% DLCO)	No Restriction (>80% TLC)	Baseline Long COVID Clinic Visit	Reticulations	0
41	Diffusion Impaired (≤80% DLCO)	No Restriction (>80% TLC)	Baseline Long COVID Clinic Visit	Other Fibrosis	0
41	Diffusion Impaired (≤80% DLCO)	No Restriction (>80% TLC)	Baseline Long COVID Clinic Visit	Bronchiectasis	0
41	Diffusion Impaired (≤80% DLCO)	No Restriction (>80% TLC)	Baseline Long COVID Clinic Visit	Consolidation	0
41	Diffusion Impaired (≤80% DLCO)	No Restriction (>80% TLC)	Baseline Long COVID Clinic Visit	Emphysema	0
40	Diffusion Impaired (≤80% DLCO)	Moderate Restriction (51-70% TLC)	Baseline Long COVID Clinic Visit	Ground Glass Opacities	1
40	Diffusion Impaired (≤80% DLCO)	Moderate Restriction (51-70% TLC)	Baseline Long COVID Clinic Visit	Reticulations	1
40	Diffusion Impaired (≤80% DLCO)	Moderate Restriction (51-70% TLC)	Baseline Long COVID Clinic Visit	Other Fibrosis	1
40	Diffusion Impaired (≤80% DLCO)	Moderate Restriction (51-70% TLC)	Baseline Long COVID Clinic Visit	Bronchiectasis	1
40	Diffusion Impaired (≤80% DLCO)	Moderate Restriction (51-70% TLC)	Baseline Long COVID Clinic Visit	Consolidation	0
40	Diffusion Impaired (≤80% DLCO)	Moderate Restriction (51-70% TLC)	Baseline Long COVID Clinic Visit	Emphysema	0
44	Diffusion Impaired (≤80% DLCO)	Severe Restriction (≤50% TLC)	Baseline Long COVID Clinic Visit	Ground Glass Opacities	1
44	Diffusion Impaired (≤80% DLCO)	Severe Restriction (≤50% TLC)	Baseline Long COVID Clinic Visit	Reticulations	1
44	Diffusion Impaired (≤80% DLCO)	Severe Restriction (≤50% TLC)	Baseline Long COVID Clinic Visit	Other Fibrosis	0
44	Diffusion Impaired (≤80% DLCO)	Severe Restriction (≤50% TLC)	Baseline Long COVID Clinic Visit	Bronchiectasis	0
44	Diffusion Impaired (≤80% DLCO)	Severe Restriction (≤50% TLC)	Baseline Long COVID Clinic Visit	Consolidation	1
44	Diffusion Impaired (≤80% DLCO)	Severe Restriction (≤50% TLC)	Baseline Long COVID Clinic Visit	Emphysema	0
45	Diffusion Impaired (≤80% DLCO)	Severe Restriction (≤50% TLC)	Baseline Long COVID Clinic Visit	Ground Glass Opacities	1
45	Diffusion Impaired (≤80% DLCO)	Severe Restriction (≤50% TLC)	Baseline Long COVID Clinic Visit	Reticulations	1
45	Diffusion Impaired (≤80% DLCO)	Severe Restriction (≤50% TLC)	Baseline Long COVID Clinic Visit	Other Fibrosis	1
45	Diffusion Impaired (≤80% DLCO)	Severe Restriction (≤50% TLC)	Baseline Long COVID Clinic Visit	Bronchiectasis	1
45	Diffusion Impaired (≤80% DLCO)	Severe Restriction (≤50% TLC)	Baseline Long COVID Clinic Visit	Consolidation	0
45	Diffusion Impaired (≤80% DLCO)	Severe Restriction (≤50% TLC)	Baseline Long COVID Clinic Visit	Emphysema	1
46	Diffusion Impaired (≤80% DLCO)	Moderate Restriction (51-70% TLC)	Baseline Long COVID Clinic Visit	Ground Glass Opacities	1
46	Diffusion Impaired (≤80% DLCO)	Moderate Restriction (51-70% TLC)	Baseline Long COVID Clinic Visit	Reticulations	1
46	Diffusion Impaired (≤80% DLCO)	Moderate Restriction (51-70% TLC)	Baseline Long COVID Clinic Visit	Other Fibrosis	1
46	Diffusion Impaired (≤80% DLCO)	Moderate Restriction (51-70% TLC)	Baseline Long COVID Clinic Visit	Bronchiectasis	1
46	Diffusion Impaired (≤80% DLCO)	Moderate Restriction (51-70% TLC)	Baseline Long COVID Clinic Visit	Consolidation	1
46	Diffusion Impaired (≤80% DLCO)	Moderate Restriction (51-70% TLC)	Baseline Long COVID Clinic Visit	Emphysema	0
47	Diffusion Impaired (≤80% DLCO)	Moderate Restriction (51-70% TLC)	Baseline Long COVID Clinic Visit	Ground Glass Opacities	0
47	Diffusion Impaired (≤80% DLCO)	Moderate Restriction (51-70% TLC)	Baseline Long COVID Clinic Visit	Reticulations	1
47	Diffusion Impaired (≤80% DLCO)	Moderate Restriction (51-70% TLC)	Baseline Long COVID Clinic Visit	Other Fibrosis	0
47	Diffusion Impaired (≤80% DLCO)	Moderate Restriction (51-70% TLC)	Baseline Long COVID Clinic Visit	Bronchiectasis	1
47	Diffusion Impaired (≤80% DLCO)	Moderate Restriction (51-70% TLC)	Baseline Long COVID Clinic Visit	Consolidation	0
47	Diffusion Impaired (≤80% DLCO)	Moderate Restriction (51-70% TLC)	Baseline Long COVID Clinic Visit	Emphysema	1
48	Diffusion Impaired (≤80% DLCO)	Severe Restriction (≤50% TLC)	Baseline Long COVID Clinic Visit	Ground Glass Opacities	1
48	Diffusion Impaired (≤80% DLCO)	Severe Restriction (≤50% TLC)	Baseline Long COVID Clinic Visit	Reticulations	1
48	Diffusion Impaired (≤80% DLCO)	Severe Restriction (≤50% TLC)	Baseline Long COVID Clinic Visit	Other Fibrosis	1
48	Diffusion Impaired (≤80% DLCO)	Severe Restriction (≤50% TLC)	Baseline Long COVID Clinic Visit	Bronchiectasis	1
48	Diffusion Impaired (≤80% DLCO)	Severe Restriction (≤50% TLC)	Baseline Long COVID Clinic Visit	Consolidation	1
48	Diffusion Impaired (≤80% DLCO)	Severe Restriction (≤50% TLC)	Baseline Long COVID Clinic Visit	Emphysema	0
49	Diffusion Impaired (≤80% DLCO)	Moderate Restriction (51-70% TLC)	Baseline Long COVID Clinic Visit	Ground Glass Opacities	0
49	Diffusion Impaired (≤80% DLCO)	Moderate Restriction (51-70% TLC)	Baseline Long COVID Clinic Visit	Reticulations	0
49	Diffusion Impaired (≤80% DLCO)	Moderate Restriction (51-70% TLC)	Baseline Long COVID Clinic Visit	Other Fibrosis	0
49	Diffusion Impaired (≤80% DLCO)	Moderate Restriction (51-70% TLC)	Baseline Long COVID Clinic Visit	Bronchiectasis	0
49	Diffusion Impaired (≤80% DLCO)	Moderate Restriction (51-70% TLC)	Baseline Long COVID Clinic Visit	Consolidation	0
49	Diffusion Impaired (≤80% DLCO)	Moderate Restriction (51-70% TLC)	Baseline Long COVID Clinic Visit	Emphysema	0
50	Diffusion Impaired (≤80% DLCO)	Moderate Restriction (51-70% TLC)	Baseline Long COVID Clinic Visit	Ground Glass Opacities	1
50	Diffusion Impaired (≤80% DLCO)	Moderate Restriction (51-70% TLC)	Baseline Long COVID Clinic Visit	Reticulations	1
50	Diffusion Impaired (≤80% DLCO)	Moderate Restriction (51-70% TLC)	Baseline Long COVID Clinic Visit	Other Fibrosis	1
50	Diffusion Impaired (≤80% DLCO)	Moderate Restriction (51-70% TLC)	Baseline Long COVID Clinic Visit	Bronchiectasis	1
50	Diffusion Impaired (≤80% DLCO)	Moderate Restriction (51-70% TLC)	Baseline Long COVID Clinic Visit	Consolidation	0
50	Diffusion Impaired (≤80% DLCO)	Moderate Restriction (51-70% TLC)	Baseline Long COVID Clinic Visit	Emphysema	0
51	Diffusion Impaired (≤80% DLCO)	Mild Restriction (71-80% TLC)	Baseline Long COVID Clinic Visit	Ground Glass Opacities	1
51	Diffusion Impaired (≤80% DLCO)	Mild Restriction (71-80% TLC)	Baseline Long COVID Clinic Visit	Reticulations	1
51	Diffusion Impaired (≤80% DLCO)	Mild Restriction (71-80% TLC)	Baseline Long COVID Clinic Visit	Other Fibrosis	1
51	Diffusion Impaired (≤80% DLCO)	Mild Restriction (71-80% TLC)	Baseline Long COVID Clinic Visit	Bronchiectasis	0
51	Diffusion Impaired (≤80% DLCO)	Mild Restriction (71-80% TLC)	Baseline Long COVID Clinic Visit	Consolidation	0
51	Diffusion Impaired (≤80% DLCO)	Mild Restriction (71-80% TLC)	Baseline Long COVID Clinic Visit	Emphysema	0
54	Diffusion Impaired (≤80% DLCO)	Moderate Restriction (51-70% TLC)	Baseline Long COVID Clinic Visit	Ground Glass Opacities	1
54	Diffusion Impaired (≤80% DLCO)	Moderate Restriction (51-70% TLC)	Baseline Long COVID Clinic Visit	Reticulations	0
54	Diffusion Impaired (≤80% DLCO)	Moderate Restriction (51-70% TLC)	Baseline Long COVID Clinic Visit	Other Fibrosis	0
54	Diffusion Impaired (≤80% DLCO)	Moderate Restriction (51-70% TLC)	Baseline Long COVID Clinic Visit	Bronchiectasis	0
54	Diffusion Impaired (≤80% DLCO)	Moderate Restriction (51-70% TLC)	Baseline Long COVID Clinic Visit	Consolidation	0
54	Diffusion Impaired (≤80% DLCO)	Moderate Restriction (51-70% TLC)	Baseline Long COVID Clinic Visit	Emphysema	0
55	Diffusion Impaired (≤80% DLCO)	Mild Restriction (71-80% TLC)	Baseline Long COVID Clinic Visit	Ground Glass Opacities	1
55	Diffusion Impaired (≤80% DLCO)	Mild Restriction (71-80% TLC)	Baseline Long COVID Clinic Visit	Reticulations	1
55	Diffusion Impaired (≤80% DLCO)	Mild Restriction (71-80% TLC)	Baseline Long COVID Clinic Visit	Other Fibrosis	1
55	Diffusion Impaired (≤80% DLCO)	Mild Restriction (71-80% TLC)	Baseline Long COVID Clinic Visit	Bronchiectasis	0
55	Diffusion Impaired (≤80% DLCO)	Mild Restriction (71-80% TLC)	Baseline Long COVID Clinic Visit	Consolidation	0
55	Diffusion Impaired (≤80% DLCO)	Mild Restriction (71-80% TLC)	Baseline Long COVID Clinic Visit	Emphysema	0
56	Diffusion Impaired (≤80% DLCO)	Mild Restriction (71-80% TLC)	Baseline Long COVID Clinic Visit	Ground Glass Opacities	0
56	Diffusion Impaired (≤80% DLCO)	Mild Restriction (71-80% TLC)	Baseline Long COVID Clinic Visit	Reticulations	0
56	Diffusion Impaired (≤80% DLCO)	Mild Restriction (71-80% TLC)	Baseline Long COVID Clinic Visit	Other Fibrosis	0
56	Diffusion Impaired (≤80% DLCO)	Mild Restriction (71-80% TLC)	Baseline Long COVID Clinic Visit	Bronchiectasis	0
56	Diffusion Impaired (≤80% DLCO)	Mild Restriction (71-80% TLC)	Baseline Long COVID Clinic Visit	Consolidation	0
56	Diffusion Impaired (≤80% DLCO)	Mild Restriction (71-80% TLC)	Baseline Long COVID Clinic Visit	Emphysema	0
57	Diffusion Impaired (≤80% DLCO)	Severe Restriction (≤50% TLC)	Baseline Long COVID Clinic Visit	Ground Glass Opacities	1
57	Diffusion Impaired (≤80% DLCO)	Severe Restriction (≤50% TLC)	Baseline Long COVID Clinic Visit	Reticulations	1
57	Diffusion Impaired (≤80% DLCO)	Severe Restriction (≤50% TLC)	Baseline Long COVID Clinic Visit	Other Fibrosis	1
57	Diffusion Impaired (≤80% DLCO)	Severe Restriction (≤50% TLC)	Baseline Long COVID Clinic Visit	Bronchiectasis	1
57	Diffusion Impaired (≤80% DLCO)	Severe Restriction (≤50% TLC)	Baseline Long COVID Clinic Visit	Consolidation	1
57	Diffusion Impaired (≤80% DLCO)	Severe Restriction (≤50% TLC)	Baseline Long COVID Clinic Visit	Emphysema	0
58	Diffusion Impaired (≤80% DLCO)	Moderate Restriction (51-70% TLC)	Baseline Long COVID Clinic Visit	Ground Glass Opacities	1
58	Diffusion Impaired (≤80% DLCO)	Moderate Restriction (51-70% TLC)	Baseline Long COVID Clinic Visit	Reticulations	1
58	Diffusion Impaired (≤80% DLCO)	Moderate Restriction (51-70% TLC)	Baseline Long COVID Clinic Visit	Other Fibrosis	1
58	Diffusion Impaired (≤80% DLCO)	Moderate Restriction (51-70% TLC)	Baseline Long COVID Clinic Visit	Bronchiectasis	1
58	Diffusion Impaired (≤80% DLCO)	Moderate Restriction (51-70% TLC)	Baseline Long COVID Clinic Visit	Consolidation	0
58	Diffusion Impaired (≤80% DLCO)	Moderate Restriction (51-70% TLC)	Baseline Long COVID Clinic Visit	Emphysema	0
59	Diffusion Impaired (≤80% DLCO)	Moderate Restriction (51-70% TLC)	Baseline Long COVID Clinic Visit	Ground Glass Opacities	0
59	Diffusion Impaired (≤80% DLCO)	Moderate Restriction (51-70% TLC)	Baseline Long COVID Clinic Visit	Reticulations	1
59	Diffusion Impaired (≤80% DLCO)	Moderate Restriction (51-70% TLC)	Baseline Long COVID Clinic Visit	Other Fibrosis	0
59	Diffusion Impaired (≤80% DLCO)	Moderate Restriction (51-70% TLC)	Baseline Long COVID Clinic Visit	Bronchiectasis	1
59	Diffusion Impaired (≤80% DLCO)	Moderate Restriction (51-70% TLC)	Baseline Long COVID Clinic Visit	Consolidation	0
59	Diffusion Impaired (≤80% DLCO)	Moderate Restriction (51-70% TLC)	Baseline Long COVID Clinic Visit	Emphysema	0
60	Diffusion Impaired (≤80% DLCO)	Severe Restriction (≤50% TLC)	Baseline Long COVID Clinic Visit	Ground Glass Opacities	1
60	Diffusion Impaired (≤80% DLCO)	Severe Restriction (≤50% TLC)	Baseline Long COVID Clinic Visit	Reticulations	1
60	Diffusion Impaired (≤80% DLCO)	Severe Restriction (≤50% TLC)	Baseline Long COVID Clinic Visit	Other Fibrosis	1
60	Diffusion Impaired (≤80% DLCO)	Severe Restriction (≤50% TLC)	Baseline Long COVID Clinic Visit	Bronchiectasis	1
60	Diffusion Impaired (≤80% DLCO)	Severe Restriction (≤50% TLC)	Baseline Long COVID Clinic Visit	Consolidation	0
60	Diffusion Impaired (≤80% DLCO)	Severe Restriction (≤50% TLC)	Baseline Long COVID Clinic Visit	Emphysema	0
61	Diffusion Impaired (≤80% DLCO)	Severe Restriction (≤50% TLC)	Baseline Long COVID Clinic Visit	Ground Glass Opacities	1
61	Diffusion Impaired (≤80% DLCO)	Severe Restriction (≤50% TLC)	Baseline Long COVID Clinic Visit	Reticulations	1
61	Diffusion Impaired (≤80% DLCO)	Severe Restriction (≤50% TLC)	Baseline Long COVID Clinic Visit	Other Fibrosis	1
61	Diffusion Impaired (≤80% DLCO)	Severe Restriction (≤50% TLC)	Baseline Long COVID Clinic Visit	Bronchiectasis	1
61	Diffusion Impaired (≤80% DLCO)	Severe Restriction (≤50% TLC)	Baseline Long COVID Clinic Visit	Consolidation	0
61	Diffusion Impaired (≤80% DLCO)	Severe Restriction (≤50% TLC)	Baseline Long COVID Clinic Visit	Emphysema	0
22	Diffusion Impaired (≤80% DLCO)	Moderate Restriction (51-70% TLC)	Baseline Long COVID Clinic Visit	Ground Glass Opacities	1
22	Diffusion Impaired (≤80% DLCO)	Moderate Restriction (51-70% TLC)	Baseline Long COVID Clinic Visit	Reticulations	0
22	Diffusion Impaired (≤80% DLCO)	Moderate Restriction (51-70% TLC)	Baseline Long COVID Clinic Visit	Other Fibrosis	0
22	Diffusion Impaired (≤80% DLCO)	Moderate Restriction (51-70% TLC)	Baseline Long COVID Clinic Visit	Bronchiectasis	0
22	Diffusion Impaired (≤80% DLCO)	Moderate Restriction (51-70% TLC)	Baseline Long COVID Clinic Visit	Consolidation	0
22	Diffusion Impaired (≤80% DLCO)	Moderate Restriction (51-70% TLC)	Baseline Long COVID Clinic Visit	Emphysema	0
215	Diffusion Impaired (≤80% DLCO)	Severe Restriction (≤50% TLC)	Baseline Long COVID Clinic Visit	Ground Glass Opacities	1
215	Diffusion Impaired (≤80% DLCO)	Severe Restriction (≤50% TLC)	Baseline Long COVID Clinic Visit	Reticulations	1
215	Diffusion Impaired (≤80% DLCO)	Severe Restriction (≤50% TLC)	Baseline Long COVID Clinic Visit	Other Fibrosis	1
215	Diffusion Impaired (≤80% DLCO)	Severe Restriction (≤50% TLC)	Baseline Long COVID Clinic Visit	Bronchiectasis	1
215	Diffusion Impaired (≤80% DLCO)	Severe Restriction (≤50% TLC)	Baseline Long COVID Clinic Visit	Consolidation	1
215	Diffusion Impaired (≤80% DLCO)	Severe Restriction (≤50% TLC)	Baseline Long COVID Clinic Visit	Emphysema	0
231	Diffusion Impaired (≤80% DLCO)	Severe Restriction (≤50% TLC)	Baseline Long COVID Clinic Visit	Ground Glass Opacities	1
231	Diffusion Impaired (≤80% DLCO)	Severe Restriction (≤50% TLC)	Baseline Long COVID Clinic Visit	Reticulations	0
231	Diffusion Impaired (≤80% DLCO)	Severe Restriction (≤50% TLC)	Baseline Long COVID Clinic Visit	Other Fibrosis	0
231	Diffusion Impaired (≤80% DLCO)	Severe Restriction (≤50% TLC)	Baseline Long COVID Clinic Visit	Bronchiectasis	0
231	Diffusion Impaired (≤80% DLCO)	Severe Restriction (≤50% TLC)	Baseline Long COVID Clinic Visit	Consolidation	1
231	Diffusion Impaired (≤80% DLCO)	Severe Restriction (≤50% TLC)	Baseline Long COVID Clinic Visit	Emphysema	0
240	Diffusion Impaired (≤80% DLCO)	Severe Restriction (≤50% TLC)	Baseline Long COVID Clinic Visit	Ground Glass Opacities	1
240	Diffusion Impaired (≤80% DLCO)	Severe Restriction (≤50% TLC)	Baseline Long COVID Clinic Visit	Reticulations	1
240	Diffusion Impaired (≤80% DLCO)	Severe Restriction (≤50% TLC)	Baseline Long COVID Clinic Visit	Other Fibrosis	1
240	Diffusion Impaired (≤80% DLCO)	Severe Restriction (≤50% TLC)	Baseline Long COVID Clinic Visit	Bronchiectasis	1
240	Diffusion Impaired (≤80% DLCO)	Severe Restriction (≤50% TLC)	Baseline Long COVID Clinic Visit	Consolidation	0
240	Diffusion Impaired (≤80% DLCO)	Severe Restriction (≤50% TLC)	Baseline Long COVID Clinic Visit	Emphysema	0
20	Diffusion Impaired (≤80% DLCO)	Mild Restriction (71-80% TLC)	Baseline Long COVID Clinic Visit	Ground Glass Opacities	1
20	Diffusion Impaired (≤80% DLCO)	Mild Restriction (71-80% TLC)	Baseline Long COVID Clinic Visit	Reticulations	1
20	Diffusion Impaired (≤80% DLCO)	Mild Restriction (71-80% TLC)	Baseline Long COVID Clinic Visit	Other Fibrosis	0
20	Diffusion Impaired (≤80% DLCO)	Mild Restriction (71-80% TLC)	Baseline Long COVID Clinic Visit	Bronchiectasis	0
20	Diffusion Impaired (≤80% DLCO)	Mild Restriction (71-80% TLC)	Baseline Long COVID Clinic Visit	Consolidation	0
20	Diffusion Impaired (≤80% DLCO)	Mild Restriction (71-80% TLC)	Baseline Long COVID Clinic Visit	Emphysema	0
218	Diffusion Impaired (≤80% DLCO)	Moderate Restriction (51-70% TLC)	Baseline Long COVID Clinic Visit	Ground Glass Opacities	0
218	Diffusion Impaired (≤80% DLCO)	Moderate Restriction (51-70% TLC)	Baseline Long COVID Clinic Visit	Reticulations	0
218	Diffusion Impaired (≤80% DLCO)	Moderate Restriction (51-70% TLC)	Baseline Long COVID Clinic Visit	Other Fibrosis	0
218	Diffusion Impaired (≤80% DLCO)	Moderate Restriction (51-70% TLC)	Baseline Long COVID Clinic Visit	Bronchiectasis	0
218	Diffusion Impaired (≤80% DLCO)	Moderate Restriction (51-70% TLC)	Baseline Long COVID Clinic Visit	Consolidation	0
218	Diffusion Impaired (≤80% DLCO)	Moderate Restriction (51-70% TLC)	Baseline Long COVID Clinic Visit	Emphysema	0
16	Diffusion Impaired (≤80% DLCO)	Moderate Restriction (51-70% TLC)	Baseline Long COVID Clinic Visit	Ground Glass Opacities	0
16	Diffusion Impaired (≤80% DLCO)	Moderate Restriction (51-70% TLC)	Baseline Long COVID Clinic Visit	Reticulations	0
16	Diffusion Impaired (≤80% DLCO)	Moderate Restriction (51-70% TLC)	Baseline Long COVID Clinic Visit	Other Fibrosis	0
16	Diffusion Impaired (≤80% DLCO)	Moderate Restriction (51-70% TLC)	Baseline Long COVID Clinic Visit	Bronchiectasis	0
16	Diffusion Impaired (≤80% DLCO)	Moderate Restriction (51-70% TLC)	Baseline Long COVID Clinic Visit	Consolidation	0
16	Diffusion Impaired (≤80% DLCO)	Moderate Restriction (51-70% TLC)	Baseline Long COVID Clinic Visit	Emphysema	0
30	Diffusion Impaired (≤80% DLCO)	Mild Restriction (71-80% TLC)	Baseline Long COVID Clinic Visit	Ground Glass Opacities	1
30	Diffusion Impaired (≤80% DLCO)	Mild Restriction (71-80% TLC)	Baseline Long COVID Clinic Visit	Reticulations	1
30	Diffusion Impaired (≤80% DLCO)	Mild Restriction (71-80% TLC)	Baseline Long COVID Clinic Visit	Other Fibrosis	0
30	Diffusion Impaired (≤80% DLCO)	Mild Restriction (71-80% TLC)	Baseline Long COVID Clinic Visit	Bronchiectasis	1
30	Diffusion Impaired (≤80% DLCO)	Mild Restriction (71-80% TLC)	Baseline Long COVID Clinic Visit	Consolidation	0
30	Diffusion Impaired (≤80% DLCO)	Mild Restriction (71-80% TLC)	Baseline Long COVID Clinic Visit	Emphysema	0
217	Diffusion Impaired (≤80% DLCO)	Moderate Restriction (51-70% TLC)	Baseline Long COVID Clinic Visit	Ground Glass Opacities	0
217	Diffusion Impaired (≤80% DLCO)	Moderate Restriction (51-70% TLC)	Baseline Long COVID Clinic Visit	Reticulations	1
217	Diffusion Impaired (≤80% DLCO)	Moderate Restriction (51-70% TLC)	Baseline Long COVID Clinic Visit	Other Fibrosis	0
217	Diffusion Impaired (≤80% DLCO)	Moderate Restriction (51-70% TLC)	Baseline Long COVID Clinic Visit	Bronchiectasis	1
217	Diffusion Impaired (≤80% DLCO)	Moderate Restriction (51-70% TLC)	Baseline Long COVID Clinic Visit	Consolidation	0
217	Diffusion Impaired (≤80% DLCO)	Moderate Restriction (51-70% TLC)	Baseline Long COVID Clinic Visit	Emphysema	0
12	Diffusion Impaired (≤80% DLCO)	Severe Restriction (≤50% TLC)	Baseline Long COVID Clinic Visit	Ground Glass Opacities	0
12	Diffusion Impaired (≤80% DLCO)	Severe Restriction (≤50% TLC)	Baseline Long COVID Clinic Visit	Reticulations	0
12	Diffusion Impaired (≤80% DLCO)	Severe Restriction (≤50% TLC)	Baseline Long COVID Clinic Visit	Other Fibrosis	0
12	Diffusion Impaired (≤80% DLCO)	Severe Restriction (≤50% TLC)	Baseline Long COVID Clinic Visit	Bronchiectasis	0
12	Diffusion Impaired (≤80% DLCO)	Severe Restriction (≤50% TLC)	Baseline Long COVID Clinic Visit	Consolidation	0
12	Diffusion Impaired (≤80% DLCO)	Severe Restriction (≤50% TLC)	Baseline Long COVID Clinic Visit	Emphysema	0
238	Diffusion Impaired (≤80% DLCO)	Moderate Restriction (51-70% TLC)	Baseline Long COVID Clinic Visit	Ground Glass Opacities	0
238	Diffusion Impaired (≤80% DLCO)	Moderate Restriction (51-70% TLC)	Baseline Long COVID Clinic Visit	Reticulations	1
238	Diffusion Impaired (≤80% DLCO)	Moderate Restriction (51-70% TLC)	Baseline Long COVID Clinic Visit	Other Fibrosis	0
238	Diffusion Impaired (≤80% DLCO)	Moderate Restriction (51-70% TLC)	Baseline Long COVID Clinic Visit	Bronchiectasis	0
238	Diffusion Impaired (≤80% DLCO)	Moderate Restriction (51-70% TLC)	Baseline Long COVID Clinic Visit	Consolidation	0
238	Diffusion Impaired (≤80% DLCO)	Moderate Restriction (51-70% TLC)	Baseline Long COVID Clinic Visit	Emphysema	0
223	Diffusion Impaired (≤80% DLCO)	Severe Restriction (≤50% TLC)	Baseline Long COVID Clinic Visit	Ground Glass Opacities	0
223	Diffusion Impaired (≤80% DLCO)	Severe Restriction (≤50% TLC)	Baseline Long COVID Clinic Visit	Reticulations	1
223	Diffusion Impaired (≤80% DLCO)	Severe Restriction (≤50% TLC)	Baseline Long COVID Clinic Visit	Other Fibrosis	1
223	Diffusion Impaired (≤80% DLCO)	Severe Restriction (≤50% TLC)	Baseline Long COVID Clinic Visit	Bronchiectasis	1
223	Diffusion Impaired (≤80% DLCO)	Severe Restriction (≤50% TLC)	Baseline Long COVID Clinic Visit	Consolidation	0
223	Diffusion Impaired (≤80% DLCO)	Severe Restriction (≤50% TLC)	Baseline Long COVID Clinic Visit	Emphysema	0
23	Diffusion Impaired (≤80% DLCO)	Mild Restriction (71-80% TLC)	Baseline Long COVID Clinic Visit	Ground Glass Opacities	0
23	Diffusion Impaired (≤80% DLCO)	Mild Restriction (71-80% TLC)	Baseline Long COVID Clinic Visit	Reticulations	0
23	Diffusion Impaired (≤80% DLCO)	Mild Restriction (71-80% TLC)	Baseline Long COVID Clinic Visit	Other Fibrosis	0
23	Diffusion Impaired (≤80% DLCO)	Mild Restriction (71-80% TLC)	Baseline Long COVID Clinic Visit	Bronchiectasis	0
23	Diffusion Impaired (≤80% DLCO)	Mild Restriction (71-80% TLC)	Baseline Long COVID Clinic Visit	Consolidation	0
23	Diffusion Impaired (≤80% DLCO)	Mild Restriction (71-80% TLC)	Baseline Long COVID Clinic Visit	Emphysema	1
219	Diffusion Impaired (≤80% DLCO)	Severe Restriction (≤50% TLC)	Baseline Long COVID Clinic Visit	Ground Glass Opacities	1
219	Diffusion Impaired (≤80% DLCO)	Severe Restriction (≤50% TLC)	Baseline Long COVID Clinic Visit	Reticulations	1
219	Diffusion Impaired (≤80% DLCO)	Severe Restriction (≤50% TLC)	Baseline Long COVID Clinic Visit	Other Fibrosis	1
219	Diffusion Impaired (≤80% DLCO)	Severe Restriction (≤50% TLC)	Baseline Long COVID Clinic Visit	Bronchiectasis	1
219	Diffusion Impaired (≤80% DLCO)	Severe Restriction (≤50% TLC)	Baseline Long COVID Clinic Visit	Consolidation	1
219	Diffusion Impaired (≤80% DLCO)	Severe Restriction (≤50% TLC)	Baseline Long COVID Clinic Visit	Emphysema	0
31	Diffusion Impaired (≤80% DLCO)	Moderate Restriction (51-70% TLC)	Baseline Long COVID Clinic Visit	Ground Glass Opacities	1
31	Diffusion Impaired (≤80% DLCO)	Moderate Restriction (51-70% TLC)	Baseline Long COVID Clinic Visit	Reticulations	0
31	Diffusion Impaired (≤80% DLCO)	Moderate Restriction (51-70% TLC)	Baseline Long COVID Clinic Visit	Other Fibrosis	0
31	Diffusion Impaired (≤80% DLCO)	Moderate Restriction (51-70% TLC)	Baseline Long COVID Clinic Visit	Bronchiectasis	0
31	Diffusion Impaired (≤80% DLCO)	Moderate Restriction (51-70% TLC)	Baseline Long COVID Clinic Visit	Consolidation	0
31	Diffusion Impaired (≤80% DLCO)	Moderate Restriction (51-70% TLC)	Baseline Long COVID Clinic Visit	Emphysema	0
246	Diffusion Impaired (≤80% DLCO)	Severe Restriction (≤50% TLC)	Baseline Long COVID Clinic Visit	Ground Glass Opacities	1
246	Diffusion Impaired (≤80% DLCO)	Severe Restriction (≤50% TLC)	Baseline Long COVID Clinic Visit	Reticulations	1
246	Diffusion Impaired (≤80% DLCO)	Severe Restriction (≤50% TLC)	Baseline Long COVID Clinic Visit	Other Fibrosis	1
246	Diffusion Impaired (≤80% DLCO)	Severe Restriction (≤50% TLC)	Baseline Long COVID Clinic Visit	Bronchiectasis	1
246	Diffusion Impaired (≤80% DLCO)	Severe Restriction (≤50% TLC)	Baseline Long COVID Clinic Visit	Consolidation	0
246	Diffusion Impaired (≤80% DLCO)	Severe Restriction (≤50% TLC)	Baseline Long COVID Clinic Visit	Emphysema	0
13	Diffusion Impaired (≤80% DLCO)	Severe Restriction (≤50% TLC)	Baseline Long COVID Clinic Visit	Ground Glass Opacities	1
13	Diffusion Impaired (≤80% DLCO)	Severe Restriction (≤50% TLC)	Baseline Long COVID Clinic Visit	Reticulations	0
13	Diffusion Impaired (≤80% DLCO)	Severe Restriction (≤50% TLC)	Baseline Long COVID Clinic Visit	Other Fibrosis	0
13	Diffusion Impaired (≤80% DLCO)	Severe Restriction (≤50% TLC)	Baseline Long COVID Clinic Visit	Bronchiectasis	1
13	Diffusion Impaired (≤80% DLCO)	Severe Restriction (≤50% TLC)	Baseline Long COVID Clinic Visit	Consolidation	0
13	Diffusion Impaired (≤80% DLCO)	Severe Restriction (≤50% TLC)	Baseline Long COVID Clinic Visit	Emphysema	0
37	Diffusion Impaired (≤80% DLCO)	Severe Restriction (≤50% TLC)	Baseline Long COVID Clinic Visit	Ground Glass Opacities	1
37	Diffusion Impaired (≤80% DLCO)	Severe Restriction (≤50% TLC)	Baseline Long COVID Clinic Visit	Reticulations	1
37	Diffusion Impaired (≤80% DLCO)	Severe Restriction (≤50% TLC)	Baseline Long COVID Clinic Visit	Other Fibrosis	0
37	Diffusion Impaired (≤80% DLCO)	Severe Restriction (≤50% TLC)	Baseline Long COVID Clinic Visit	Bronchiectasis	0
37	Diffusion Impaired (≤80% DLCO)	Severe Restriction (≤50% TLC)	Baseline Long COVID Clinic Visit	Consolidation	1
37	Diffusion Impaired (≤80% DLCO)	Severe Restriction (≤50% TLC)	Baseline Long COVID Clinic Visit	Emphysema	0
19	Diffusion Impaired (≤80% DLCO)	Mild Restriction (71-80% TLC)	Baseline Long COVID Clinic Visit	Ground Glass Opacities	0
19	Diffusion Impaired (≤80% DLCO)	Mild Restriction (71-80% TLC)	Baseline Long COVID Clinic Visit	Reticulations	1
19	Diffusion Impaired (≤80% DLCO)	Mild Restriction (71-80% TLC)	Baseline Long COVID Clinic Visit	Other Fibrosis	0
19	Diffusion Impaired (≤80% DLCO)	Mild Restriction (71-80% TLC)	Baseline Long COVID Clinic Visit	Bronchiectasis	0
19	Diffusion Impaired (≤80% DLCO)	Mild Restriction (71-80% TLC)	Baseline Long COVID Clinic Visit	Consolidation	1
19	Diffusion Impaired (≤80% DLCO)	Mild Restriction (71-80% TLC)	Baseline Long COVID Clinic Visit	Emphysema	0
15	Diffusion Impaired (≤80% DLCO)	Moderate Restriction (51-70% TLC)	Baseline Long COVID Clinic Visit	Ground Glass Opacities	1
15	Diffusion Impaired (≤80% DLCO)	Moderate Restriction (51-70% TLC)	Baseline Long COVID Clinic Visit	Reticulations	0
15	Diffusion Impaired (≤80% DLCO)	Moderate Restriction (51-70% TLC)	Baseline Long COVID Clinic Visit	Other Fibrosis	0
15	Diffusion Impaired (≤80% DLCO)	Moderate Restriction (51-70% TLC)	Baseline Long COVID Clinic Visit	Bronchiectasis	0
15	Diffusion Impaired (≤80% DLCO)	Moderate Restriction (51-70% TLC)	Baseline Long COVID Clinic Visit	Consolidation	0
15	Diffusion Impaired (≤80% DLCO)	Moderate Restriction (51-70% TLC)	Baseline Long COVID Clinic Visit	Emphysema	0
9	Diffusion Impaired (≤80% DLCO)	Severe Restriction (≤50% TLC)	Baseline Long COVID Clinic Visit	Ground Glass Opacities	1
9	Diffusion Impaired (≤80% DLCO)	Severe Restriction (≤50% TLC)	Baseline Long COVID Clinic Visit	Reticulations	1
9	Diffusion Impaired (≤80% DLCO)	Severe Restriction (≤50% TLC)	Baseline Long COVID Clinic Visit	Other Fibrosis	0
9	Diffusion Impaired (≤80% DLCO)	Severe Restriction (≤50% TLC)	Baseline Long COVID Clinic Visit	Bronchiectasis	0
9	Diffusion Impaired (≤80% DLCO)	Severe Restriction (≤50% TLC)	Baseline Long COVID Clinic Visit	Consolidation	0
9	Diffusion Impaired (≤80% DLCO)	Severe Restriction (≤50% TLC)	Baseline Long COVID Clinic Visit	Emphysema	0
17	Diffusion Impaired (≤80% DLCO)	Mild Restriction (71-80% TLC)	Baseline Long COVID Clinic Visit	Ground Glass Opacities	0
17	Diffusion Impaired (≤80% DLCO)	Mild Restriction (71-80% TLC)	Baseline Long COVID Clinic Visit	Reticulations	0
17	Diffusion Impaired (≤80% DLCO)	Mild Restriction (71-80% TLC)	Baseline Long COVID Clinic Visit	Other Fibrosis	0
17	Diffusion Impaired (≤80% DLCO)	Mild Restriction (71-80% TLC)	Baseline Long COVID Clinic Visit	Bronchiectasis	0
17	Diffusion Impaired (≤80% DLCO)	Mild Restriction (71-80% TLC)	Baseline Long COVID Clinic Visit	Consolidation	0
17	Diffusion Impaired (≤80% DLCO)	Mild Restriction (71-80% TLC)	Baseline Long COVID Clinic Visit	Emphysema	0
18	Diffusion Impaired (≤80% DLCO)	Severe Restriction (≤50% TLC)	Baseline Long COVID Clinic Visit	Ground Glass Opacities	1
18	Diffusion Impaired (≤80% DLCO)	Severe Restriction (≤50% TLC)	Baseline Long COVID Clinic Visit	Reticulations	1
18	Diffusion Impaired (≤80% DLCO)	Severe Restriction (≤50% TLC)	Baseline Long COVID Clinic Visit	Other Fibrosis	1
18	Diffusion Impaired (≤80% DLCO)	Severe Restriction (≤50% TLC)	Baseline Long COVID Clinic Visit	Bronchiectasis	1
18	Diffusion Impaired (≤80% DLCO)	Severe Restriction (≤50% TLC)	Baseline Long COVID Clinic Visit	Consolidation	0
18	Diffusion Impaired (≤80% DLCO)	Severe Restriction (≤50% TLC)	Baseline Long COVID Clinic Visit	Emphysema	0
242	Diffusion Impaired (≤80% DLCO)	Severe Restriction (≤50% TLC)	Baseline Long COVID Clinic Visit	Ground Glass Opacities	1
242	Diffusion Impaired (≤80% DLCO)	Severe Restriction (≤50% TLC)	Baseline Long COVID Clinic Visit	Reticulations	1
242	Diffusion Impaired (≤80% DLCO)	Severe Restriction (≤50% TLC)	Baseline Long COVID Clinic Visit	Other Fibrosis	1
242	Diffusion Impaired (≤80% DLCO)	Severe Restriction (≤50% TLC)	Baseline Long COVID Clinic Visit	Bronchiectasis	1
242	Diffusion Impaired (≤80% DLCO)	Severe Restriction (≤50% TLC)	Baseline Long COVID Clinic Visit	Consolidation	0
242	Diffusion Impaired (≤80% DLCO)	Severe Restriction (≤50% TLC)	Baseline Long COVID Clinic Visit	Emphysema	0
232	Diffusion Impaired (≤80% DLCO)	Moderate Restriction (51-70% TLC)	Baseline Long COVID Clinic Visit	Ground Glass Opacities	1
232	Diffusion Impaired (≤80% DLCO)	Moderate Restriction (51-70% TLC)	Baseline Long COVID Clinic Visit	Reticulations	1
232	Diffusion Impaired (≤80% DLCO)	Moderate Restriction (51-70% TLC)	Baseline Long COVID Clinic Visit	Other Fibrosis	0
232	Diffusion Impaired (≤80% DLCO)	Moderate Restriction (51-70% TLC)	Baseline Long COVID Clinic Visit	Bronchiectasis	0
232	Diffusion Impaired (≤80% DLCO)	Moderate Restriction (51-70% TLC)	Baseline Long COVID Clinic Visit	Consolidation	0
232	Diffusion Impaired (≤80% DLCO)	Moderate Restriction (51-70% TLC)	Baseline Long COVID Clinic Visit	Emphysema	0
206	Diffusion Impaired (≤80% DLCO)	No Restriction (>80% TLC)	Baseline Long COVID Clinic Visit	Ground Glass Opacities	1
206	Diffusion Impaired (≤80% DLCO)	No Restriction (>80% TLC)	Baseline Long COVID Clinic Visit	Reticulations	1
206	Diffusion Impaired (≤80% DLCO)	No Restriction (>80% TLC)	Baseline Long COVID Clinic Visit	Other Fibrosis	0
206	Diffusion Impaired (≤80% DLCO)	No Restriction (>80% TLC)	Baseline Long COVID Clinic Visit	Bronchiectasis	0
206	Diffusion Impaired (≤80% DLCO)	No Restriction (>80% TLC)	Baseline Long COVID Clinic Visit	Consolidation	0
206	Diffusion Impaired (≤80% DLCO)	No Restriction (>80% TLC)	Baseline Long COVID Clinic Visit	Emphysema	0
28	Diffusion Impaired (≤80% DLCO)	Moderate Restriction (51-70% TLC)	Baseline Long COVID Clinic Visit	Ground Glass Opacities	1
28	Diffusion Impaired (≤80% DLCO)	Moderate Restriction (51-70% TLC)	Baseline Long COVID Clinic Visit	Reticulations	1
28	Diffusion Impaired (≤80% DLCO)	Moderate Restriction (51-70% TLC)	Baseline Long COVID Clinic Visit	Other Fibrosis	0
28	Diffusion Impaired (≤80% DLCO)	Moderate Restriction (51-70% TLC)	Baseline Long COVID Clinic Visit	Bronchiectasis	1
28	Diffusion Impaired (≤80% DLCO)	Moderate Restriction (51-70% TLC)	Baseline Long COVID Clinic Visit	Consolidation	0
28	Diffusion Impaired (≤80% DLCO)	Moderate Restriction (51-70% TLC)	Baseline Long COVID Clinic Visit	Emphysema	0
35	Diffusion Impaired (≤80% DLCO)	Severe Restriction (≤50% TLC)	Baseline Long COVID Clinic Visit	Ground Glass Opacities	0
35	Diffusion Impaired (≤80% DLCO)	Severe Restriction (≤50% TLC)	Baseline Long COVID Clinic Visit	Reticulations	0
35	Diffusion Impaired (≤80% DLCO)	Severe Restriction (≤50% TLC)	Baseline Long COVID Clinic Visit	Other Fibrosis	0
35	Diffusion Impaired (≤80% DLCO)	Severe Restriction (≤50% TLC)	Baseline Long COVID Clinic Visit	Bronchiectasis	0
35	Diffusion Impaired (≤80% DLCO)	Severe Restriction (≤50% TLC)	Baseline Long COVID Clinic Visit	Consolidation	0
35	Diffusion Impaired (≤80% DLCO)	Severe Restriction (≤50% TLC)	Baseline Long COVID Clinic Visit	Emphysema	0
239	Diffusion Impaired (≤80% DLCO)	No Restriction (>80% TLC)	Baseline Long COVID Clinic Visit	Ground Glass Opacities	0
239	Diffusion Impaired (≤80% DLCO)	No Restriction (>80% TLC)	Baseline Long COVID Clinic Visit	Reticulations	1
239	Diffusion Impaired (≤80% DLCO)	No Restriction (>80% TLC)	Baseline Long COVID Clinic Visit	Other Fibrosis	0
239	Diffusion Impaired (≤80% DLCO)	No Restriction (>80% TLC)	Baseline Long COVID Clinic Visit	Bronchiectasis	0
239	Diffusion Impaired (≤80% DLCO)	No Restriction (>80% TLC)	Baseline Long COVID Clinic Visit	Consolidation	0
239	Diffusion Impaired (≤80% DLCO)	No Restriction (>80% TLC)	Baseline Long COVID Clinic Visit	Emphysema	1
235	Diffusion Impaired (≤80% DLCO)	Moderate Restriction (51-70% TLC)	Baseline Long COVID Clinic Visit	Ground Glass Opacities	0
235	Diffusion Impaired (≤80% DLCO)	Moderate Restriction (51-70% TLC)	Baseline Long COVID Clinic Visit	Reticulations	1
235	Diffusion Impaired (≤80% DLCO)	Moderate Restriction (51-70% TLC)	Baseline Long COVID Clinic Visit	Other Fibrosis	0
235	Diffusion Impaired (≤80% DLCO)	Moderate Restriction (51-70% TLC)	Baseline Long COVID Clinic Visit	Bronchiectasis	1
235	Diffusion Impaired (≤80% DLCO)	Moderate Restriction (51-70% TLC)	Baseline Long COVID Clinic Visit	Consolidation	0
235	Diffusion Impaired (≤80% DLCO)	Moderate Restriction (51-70% TLC)	Baseline Long COVID Clinic Visit	Emphysema	0
214	Diffusion Impaired (≤80% DLCO)	Severe Restriction (≤50% TLC)	Baseline Long COVID Clinic Visit	Ground Glass Opacities	0
214	Diffusion Impaired (≤80% DLCO)	Severe Restriction (≤50% TLC)	Baseline Long COVID Clinic Visit	Reticulations	0
214	Diffusion Impaired (≤80% DLCO)	Severe Restriction (≤50% TLC)	Baseline Long COVID Clinic Visit	Other Fibrosis	0
214	Diffusion Impaired (≤80% DLCO)	Severe Restriction (≤50% TLC)	Baseline Long COVID Clinic Visit	Bronchiectasis	0
214	Diffusion Impaired (≤80% DLCO)	Severe Restriction (≤50% TLC)	Baseline Long COVID Clinic Visit	Consolidation	0
214	Diffusion Impaired (≤80% DLCO)	Severe Restriction (≤50% TLC)	Baseline Long COVID Clinic Visit	Emphysema	0
222	Diffusion Impaired (≤80% DLCO)	Moderate Restriction (51-70% TLC)	Baseline Long COVID Clinic Visit	Ground Glass Opacities	1
222	Diffusion Impaired (≤80% DLCO)	Moderate Restriction (51-70% TLC)	Baseline Long COVID Clinic Visit	Reticulations	1
222	Diffusion Impaired (≤80% DLCO)	Moderate Restriction (51-70% TLC)	Baseline Long COVID Clinic Visit	Other Fibrosis	1
222	Diffusion Impaired (≤80% DLCO)	Moderate Restriction (51-70% TLC)	Baseline Long COVID Clinic Visit	Bronchiectasis	1
222	Diffusion Impaired (≤80% DLCO)	Moderate Restriction (51-70% TLC)	Baseline Long COVID Clinic Visit	Consolidation	1
222	Diffusion Impaired (≤80% DLCO)	Moderate Restriction (51-70% TLC)	Baseline Long COVID Clinic Visit	Emphysema	0
1	Diffusion Impaired (≤80% DLCO)	No Restriction (>80% TLC)	Baseline Long COVID Clinic Visit	Ground Glass Opacities	0
1	Diffusion Impaired (≤80% DLCO)	No Restriction (>80% TLC)	Baseline Long COVID Clinic Visit	Reticulations	0
1	Diffusion Impaired (≤80% DLCO)	No Restriction (>80% TLC)	Baseline Long COVID Clinic Visit	Other Fibrosis	0
1	Diffusion Impaired (≤80% DLCO)	No Restriction (>80% TLC)	Baseline Long COVID Clinic Visit	Bronchiectasis	0
1	Diffusion Impaired (≤80% DLCO)	No Restriction (>80% TLC)	Baseline Long COVID Clinic Visit	Consolidation	0
1	Diffusion Impaired (≤80% DLCO)	No Restriction (>80% TLC)	Baseline Long COVID Clinic Visit	Emphysema	0
3	Diffusion Impaired (≤80% DLCO)	Mild Restriction (71-80% TLC)	Baseline Long COVID Clinic Visit	Ground Glass Opacities	0
3	Diffusion Impaired (≤80% DLCO)	Mild Restriction (71-80% TLC)	Baseline Long COVID Clinic Visit	Reticulations	0
3	Diffusion Impaired (≤80% DLCO)	Mild Restriction (71-80% TLC)	Baseline Long COVID Clinic Visit	Other Fibrosis	0
3	Diffusion Impaired (≤80% DLCO)	Mild Restriction (71-80% TLC)	Baseline Long COVID Clinic Visit	Bronchiectasis	0
3	Diffusion Impaired (≤80% DLCO)	Mild Restriction (71-80% TLC)	Baseline Long COVID Clinic Visit	Consolidation	0
3	Diffusion Impaired (≤80% DLCO)	Mild Restriction (71-80% TLC)	Baseline Long COVID Clinic Visit	Emphysema	0
216	Diffusion Impaired (≤80% DLCO)	Severe Restriction (≤50% TLC)	Baseline Long COVID Clinic Visit	Ground Glass Opacities	1
216	Diffusion Impaired (≤80% DLCO)	Severe Restriction (≤50% TLC)	Baseline Long COVID Clinic Visit	Reticulations	1
216	Diffusion Impaired (≤80% DLCO)	Severe Restriction (≤50% TLC)	Baseline Long COVID Clinic Visit	Other Fibrosis	1
216	Diffusion Impaired (≤80% DLCO)	Severe Restriction (≤50% TLC)	Baseline Long COVID Clinic Visit	Bronchiectasis	1
216	Diffusion Impaired (≤80% DLCO)	Severe Restriction (≤50% TLC)	Baseline Long COVID Clinic Visit	Consolidation	0
216	Diffusion Impaired (≤80% DLCO)	Severe Restriction (≤50% TLC)	Baseline Long COVID Clinic Visit	Emphysema	0
6	Diffusion Impaired (≤80% DLCO)	Moderate Restriction (51-70% TLC)	Baseline Long COVID Clinic Visit	Ground Glass Opacities	1
6	Diffusion Impaired (≤80% DLCO)	Moderate Restriction (51-70% TLC)	Baseline Long COVID Clinic Visit	Reticulations	1
6	Diffusion Impaired (≤80% DLCO)	Moderate Restriction (51-70% TLC)	Baseline Long COVID Clinic Visit	Other Fibrosis	1
6	Diffusion Impaired (≤80% DLCO)	Moderate Restriction (51-70% TLC)	Baseline Long COVID Clinic Visit	Bronchiectasis	1
6	Diffusion Impaired (≤80% DLCO)	Moderate Restriction (51-70% TLC)	Baseline Long COVID Clinic Visit	Consolidation	1
6	Diffusion Impaired (≤80% DLCO)	Moderate Restriction (51-70% TLC)	Baseline Long COVID Clinic Visit	Emphysema	1
233	Diffusion Impaired (≤80% DLCO)	Moderate Restriction (51-70% TLC)	Baseline Long COVID Clinic Visit	Ground Glass Opacities	1
233	Diffusion Impaired (≤80% DLCO)	Moderate Restriction (51-70% TLC)	Baseline Long COVID Clinic Visit	Reticulations	0
233	Diffusion Impaired (≤80% DLCO)	Moderate Restriction (51-70% TLC)	Baseline Long COVID Clinic Visit	Other Fibrosis	0
233	Diffusion Impaired (≤80% DLCO)	Moderate Restriction (51-70% TLC)	Baseline Long COVID Clinic Visit	Bronchiectasis	1
233	Diffusion Impaired (≤80% DLCO)	Moderate Restriction (51-70% TLC)	Baseline Long COVID Clinic Visit	Consolidation	0
233	Diffusion Impaired (≤80% DLCO)	Moderate Restriction (51-70% TLC)	Baseline Long COVID Clinic Visit	Emphysema	0
213	Diffusion Impaired (≤80% DLCO)	Moderate Restriction (51-70% TLC)	Baseline Long COVID Clinic Visit	Ground Glass Opacities	1
213	Diffusion Impaired (≤80% DLCO)	Moderate Restriction (51-70% TLC)	Baseline Long COVID Clinic Visit	Reticulations	1
213	Diffusion Impaired (≤80% DLCO)	Moderate Restriction (51-70% TLC)	Baseline Long COVID Clinic Visit	Other Fibrosis	1
213	Diffusion Impaired (≤80% DLCO)	Moderate Restriction (51-70% TLC)	Baseline Long COVID Clinic Visit	Bronchiectasis	1
213	Diffusion Impaired (≤80% DLCO)	Moderate Restriction (51-70% TLC)	Baseline Long COVID Clinic Visit	Consolidation	0
213	Diffusion Impaired (≤80% DLCO)	Moderate Restriction (51-70% TLC)	Baseline Long COVID Clinic Visit	Emphysema	0
245	Diffusion Impaired (≤80% DLCO)	Severe Restriction (≤50% TLC)	Baseline Long COVID Clinic Visit	Ground Glass Opacities	1
245	Diffusion Impaired (≤80% DLCO)	Severe Restriction (≤50% TLC)	Baseline Long COVID Clinic Visit	Reticulations	1
245	Diffusion Impaired (≤80% DLCO)	Severe Restriction (≤50% TLC)	Baseline Long COVID Clinic Visit	Other Fibrosis	1
245	Diffusion Impaired (≤80% DLCO)	Severe Restriction (≤50% TLC)	Baseline Long COVID Clinic Visit	Bronchiectasis	1
245	Diffusion Impaired (≤80% DLCO)	Severe Restriction (≤50% TLC)	Baseline Long COVID Clinic Visit	Consolidation	0
245	Diffusion Impaired (≤80% DLCO)	Severe Restriction (≤50% TLC)	Baseline Long COVID Clinic Visit	Emphysema	0
4	Diffusion Impaired (≤80% DLCO)	Moderate Restriction (51-70% TLC)	Baseline Long COVID Clinic Visit	Ground Glass Opacities	1
4	Diffusion Impaired (≤80% DLCO)	Moderate Restriction (51-70% TLC)	Baseline Long COVID Clinic Visit	Reticulations	1
4	Diffusion Impaired (≤80% DLCO)	Moderate Restriction (51-70% TLC)	Baseline Long COVID Clinic Visit	Other Fibrosis	1
4	Diffusion Impaired (≤80% DLCO)	Moderate Restriction (51-70% TLC)	Baseline Long COVID Clinic Visit	Bronchiectasis	1
4	Diffusion Impaired (≤80% DLCO)	Moderate Restriction (51-70% TLC)	Baseline Long COVID Clinic Visit	Consolidation	0
4	Diffusion Impaired (≤80% DLCO)	Moderate Restriction (51-70% TLC)	Baseline Long COVID Clinic Visit	Emphysema	0
212	Diffusion Impaired (≤80% DLCO)	Mild Restriction (71-80% TLC)	Baseline Long COVID Clinic Visit	Ground Glass Opacities	1
212	Diffusion Impaired (≤80% DLCO)	Mild Restriction (71-80% TLC)	Baseline Long COVID Clinic Visit	Reticulations	1
212	Diffusion Impaired (≤80% DLCO)	Mild Restriction (71-80% TLC)	Baseline Long COVID Clinic Visit	Other Fibrosis	0
212	Diffusion Impaired (≤80% DLCO)	Mild Restriction (71-80% TLC)	Baseline Long COVID Clinic Visit	Bronchiectasis	1
212	Diffusion Impaired (≤80% DLCO)	Mild Restriction (71-80% TLC)	Baseline Long COVID Clinic Visit	Consolidation	0
212	Diffusion Impaired (≤80% DLCO)	Mild Restriction (71-80% TLC)	Baseline Long COVID Clinic Visit	Emphysema	0
234	Diffusion Impaired (≤80% DLCO)	Moderate Restriction (51-70% TLC)	Baseline Long COVID Clinic Visit	Ground Glass Opacities	1
234	Diffusion Impaired (≤80% DLCO)	Moderate Restriction (51-70% TLC)	Baseline Long COVID Clinic Visit	Reticulations	1
234	Diffusion Impaired (≤80% DLCO)	Moderate Restriction (51-70% TLC)	Baseline Long COVID Clinic Visit	Other Fibrosis	1
234	Diffusion Impaired (≤80% DLCO)	Moderate Restriction (51-70% TLC)	Baseline Long COVID Clinic Visit	Bronchiectasis	1
234	Diffusion Impaired (≤80% DLCO)	Moderate Restriction (51-70% TLC)	Baseline Long COVID Clinic Visit	Consolidation	0
234	Diffusion Impaired (≤80% DLCO)	Moderate Restriction (51-70% TLC)	Baseline Long COVID Clinic Visit	Emphysema	0
230	Diffusion Impaired (≤80% DLCO)	Mild Restriction (71-80% TLC)	Baseline Long COVID Clinic Visit	Ground Glass Opacities	0
230	Diffusion Impaired (≤80% DLCO)	Mild Restriction (71-80% TLC)	Baseline Long COVID Clinic Visit	Reticulations	0
230	Diffusion Impaired (≤80% DLCO)	Mild Restriction (71-80% TLC)	Baseline Long COVID Clinic Visit	Other Fibrosis	0
230	Diffusion Impaired (≤80% DLCO)	Mild Restriction (71-80% TLC)	Baseline Long COVID Clinic Visit	Bronchiectasis	0
230	Diffusion Impaired (≤80% DLCO)	Mild Restriction (71-80% TLC)	Baseline Long COVID Clinic Visit	Consolidation	0
230	Diffusion Impaired (≤80% DLCO)	Mild Restriction (71-80% TLC)	Baseline Long COVID Clinic Visit	Emphysema	0
5	Diffusion Impaired (≤80% DLCO)	Severe Restriction (≤50% TLC)	Baseline Long COVID Clinic Visit	Ground Glass Opacities	1
5	Diffusion Impaired (≤80% DLCO)	Severe Restriction (≤50% TLC)	Baseline Long COVID Clinic Visit	Reticulations	1
5	Diffusion Impaired (≤80% DLCO)	Severe Restriction (≤50% TLC)	Baseline Long COVID Clinic Visit	Other Fibrosis	0
5	Diffusion Impaired (≤80% DLCO)	Severe Restriction (≤50% TLC)	Baseline Long COVID Clinic Visit	Bronchiectasis	0
5	Diffusion Impaired (≤80% DLCO)	Severe Restriction (≤50% TLC)	Baseline Long COVID Clinic Visit	Consolidation	0
5	Diffusion Impaired (≤80% DLCO)	Severe Restriction (≤50% TLC)	Baseline Long COVID Clinic Visit	Emphysema	0
62	Diffusion Impaired (≤80% DLCO)	Moderate Restriction (51-70% TLC)	Baseline Long COVID Clinic Visit	Ground Glass Opacities	0
62	Diffusion Impaired (≤80% DLCO)	Moderate Restriction (51-70% TLC)	Baseline Long COVID Clinic Visit	Reticulations	0
62	Diffusion Impaired (≤80% DLCO)	Moderate Restriction (51-70% TLC)	Baseline Long COVID Clinic Visit	Other Fibrosis	0
62	Diffusion Impaired (≤80% DLCO)	Moderate Restriction (51-70% TLC)	Baseline Long COVID Clinic Visit	Bronchiectasis	0
62	Diffusion Impaired (≤80% DLCO)	Moderate Restriction (51-70% TLC)	Baseline Long COVID Clinic Visit	Consolidation	0
62	Diffusion Impaired (≤80% DLCO)	Moderate Restriction (51-70% TLC)	Baseline Long COVID Clinic Visit	Emphysema	1
63	Diffusion Impaired (≤80% DLCO)	Moderate Restriction (51-70% TLC)	Baseline Long COVID Clinic Visit	Ground Glass Opacities	1
63	Diffusion Impaired (≤80% DLCO)	Moderate Restriction (51-70% TLC)	Baseline Long COVID Clinic Visit	Reticulations	1
63	Diffusion Impaired (≤80% DLCO)	Moderate Restriction (51-70% TLC)	Baseline Long COVID Clinic Visit	Other Fibrosis	0
63	Diffusion Impaired (≤80% DLCO)	Moderate Restriction (51-70% TLC)	Baseline Long COVID Clinic Visit	Bronchiectasis	0
63	Diffusion Impaired (≤80% DLCO)	Moderate Restriction (51-70% TLC)	Baseline Long COVID Clinic Visit	Consolidation	0
63	Diffusion Impaired (≤80% DLCO)	Moderate Restriction (51-70% TLC)	Baseline Long COVID Clinic Visit	Emphysema	0
64	Diffusion Impaired (≤80% DLCO)	No Restriction (>80% TLC)	Baseline Long COVID Clinic Visit	Ground Glass Opacities	1
64	Diffusion Impaired (≤80% DLCO)	No Restriction (>80% TLC)	Baseline Long COVID Clinic Visit	Reticulations	1
64	Diffusion Impaired (≤80% DLCO)	No Restriction (>80% TLC)	Baseline Long COVID Clinic Visit	Other Fibrosis	0
64	Diffusion Impaired (≤80% DLCO)	No Restriction (>80% TLC)	Baseline Long COVID Clinic Visit	Bronchiectasis	0
64	Diffusion Impaired (≤80% DLCO)	No Restriction (>80% TLC)	Baseline Long COVID Clinic Visit	Consolidation	1
64	Diffusion Impaired (≤80% DLCO)	No Restriction (>80% TLC)	Baseline Long COVID Clinic Visit	Emphysema	0
65	Diffusion Impaired (≤80% DLCO)	Severe Restriction (≤50% TLC)	Baseline Long COVID Clinic Visit	Ground Glass Opacities	1
65	Diffusion Impaired (≤80% DLCO)	Severe Restriction (≤50% TLC)	Baseline Long COVID Clinic Visit	Reticulations	0
65	Diffusion Impaired (≤80% DLCO)	Severe Restriction (≤50% TLC)	Baseline Long COVID Clinic Visit	Other Fibrosis	0
65	Diffusion Impaired (≤80% DLCO)	Severe Restriction (≤50% TLC)	Baseline Long COVID Clinic Visit	Bronchiectasis	0
65	Diffusion Impaired (≤80% DLCO)	Severe Restriction (≤50% TLC)	Baseline Long COVID Clinic Visit	Consolidation	0
65	Diffusion Impaired (≤80% DLCO)	Severe Restriction (≤50% TLC)	Baseline Long COVID Clinic Visit	Emphysema	0
66	Diffusion Impaired (≤80% DLCO)	Severe Restriction (≤50% TLC)	Baseline Long COVID Clinic Visit	Ground Glass Opacities	1
66	Diffusion Impaired (≤80% DLCO)	Severe Restriction (≤50% TLC)	Baseline Long COVID Clinic Visit	Reticulations	1
66	Diffusion Impaired (≤80% DLCO)	Severe Restriction (≤50% TLC)	Baseline Long COVID Clinic Visit	Other Fibrosis	0
66	Diffusion Impaired (≤80% DLCO)	Severe Restriction (≤50% TLC)	Baseline Long COVID Clinic Visit	Bronchiectasis	0
66	Diffusion Impaired (≤80% DLCO)	Severe Restriction (≤50% TLC)	Baseline Long COVID Clinic Visit	Consolidation	0
66	Diffusion Impaired (≤80% DLCO)	Severe Restriction (≤50% TLC)	Baseline Long COVID Clinic Visit	Emphysema	0
67	Diffusion Impaired (≤80% DLCO)	Moderate Restriction (51-70% TLC)	Baseline Long COVID Clinic Visit	Ground Glass Opacities	1
67	Diffusion Impaired (≤80% DLCO)	Moderate Restriction (51-70% TLC)	Baseline Long COVID Clinic Visit	Reticulations	1
67	Diffusion Impaired (≤80% DLCO)	Moderate Restriction (51-70% TLC)	Baseline Long COVID Clinic Visit	Other Fibrosis	0
67	Diffusion Impaired (≤80% DLCO)	Moderate Restriction (51-70% TLC)	Baseline Long COVID Clinic Visit	Bronchiectasis	0
67	Diffusion Impaired (≤80% DLCO)	Moderate Restriction (51-70% TLC)	Baseline Long COVID Clinic Visit	Consolidation	0
67	Diffusion Impaired (≤80% DLCO)	Moderate Restriction (51-70% TLC)	Baseline Long COVID Clinic Visit	Emphysema	0
69	Diffusion Impaired (≤80% DLCO)	Moderate Restriction (51-70% TLC)	Baseline Long COVID Clinic Visit	Ground Glass Opacities	0
69	Diffusion Impaired (≤80% DLCO)	Moderate Restriction (51-70% TLC)	Baseline Long COVID Clinic Visit	Reticulations	0
69	Diffusion Impaired (≤80% DLCO)	Moderate Restriction (51-70% TLC)	Baseline Long COVID Clinic Visit	Other Fibrosis	0
69	Diffusion Impaired (≤80% DLCO)	Moderate Restriction (51-70% TLC)	Baseline Long COVID Clinic Visit	Bronchiectasis	0
69	Diffusion Impaired (≤80% DLCO)	Moderate Restriction (51-70% TLC)	Baseline Long COVID Clinic Visit	Consolidation	0
69	Diffusion Impaired (≤80% DLCO)	Moderate Restriction (51-70% TLC)	Baseline Long COVID Clinic Visit	Emphysema	0
68	Diffusion Impaired (≤80% DLCO)	Moderate Restriction (51-70% TLC)	Baseline Long COVID Clinic Visit	Ground Glass Opacities	1
68	Diffusion Impaired (≤80% DLCO)	Moderate Restriction (51-70% TLC)	Baseline Long COVID Clinic Visit	Reticulations	1
68	Diffusion Impaired (≤80% DLCO)	Moderate Restriction (51-70% TLC)	Baseline Long COVID Clinic Visit	Other Fibrosis	1
68	Diffusion Impaired (≤80% DLCO)	Moderate Restriction (51-70% TLC)	Baseline Long COVID Clinic Visit	Bronchiectasis	1
68	Diffusion Impaired (≤80% DLCO)	Moderate Restriction (51-70% TLC)	Baseline Long COVID Clinic Visit	Consolidation	0
68	Diffusion Impaired (≤80% DLCO)	Moderate Restriction (51-70% TLC)	Baseline Long COVID Clinic Visit	Emphysema	0
70	Diffusion Impaired (≤80% DLCO)	No Restriction (>80% TLC)	Baseline Long COVID Clinic Visit	Ground Glass Opacities	0
70	Diffusion Impaired (≤80% DLCO)	No Restriction (>80% TLC)	Baseline Long COVID Clinic Visit	Reticulations	1
70	Diffusion Impaired (≤80% DLCO)	No Restriction (>80% TLC)	Baseline Long COVID Clinic Visit	Other Fibrosis	0
70	Diffusion Impaired (≤80% DLCO)	No Restriction (>80% TLC)	Baseline Long COVID Clinic Visit	Bronchiectasis	0
70	Diffusion Impaired (≤80% DLCO)	No Restriction (>80% TLC)	Baseline Long COVID Clinic Visit	Consolidation	1
70	Diffusion Impaired (≤80% DLCO)	No Restriction (>80% TLC)	Baseline Long COVID Clinic Visit	Emphysema	1
71	Diffusion Impaired (≤80% DLCO)	Severe Restriction (≤50% TLC)	Baseline Long COVID Clinic Visit	Ground Glass Opacities	1
71	Diffusion Impaired (≤80% DLCO)	Severe Restriction (≤50% TLC)	Baseline Long COVID Clinic Visit	Reticulations	1
71	Diffusion Impaired (≤80% DLCO)	Severe Restriction (≤50% TLC)	Baseline Long COVID Clinic Visit	Other Fibrosis	1
71	Diffusion Impaired (≤80% DLCO)	Severe Restriction (≤50% TLC)	Baseline Long COVID Clinic Visit	Bronchiectasis	1
71	Diffusion Impaired (≤80% DLCO)	Severe Restriction (≤50% TLC)	Baseline Long COVID Clinic Visit	Consolidation	0
71	Diffusion Impaired (≤80% DLCO)	Severe Restriction (≤50% TLC)	Baseline Long COVID Clinic Visit	Emphysema	0
72	Diffusion Impaired (≤80% DLCO)	Severe Restriction (≤50% TLC)	Baseline Long COVID Clinic Visit	Ground Glass Opacities	1
72	Diffusion Impaired (≤80% DLCO)	Severe Restriction (≤50% TLC)	Baseline Long COVID Clinic Visit	Reticulations	1
72	Diffusion Impaired (≤80% DLCO)	Severe Restriction (≤50% TLC)	Baseline Long COVID Clinic Visit	Other Fibrosis	0
72	Diffusion Impaired (≤80% DLCO)	Severe Restriction (≤50% TLC)	Baseline Long COVID Clinic Visit	Bronchiectasis	1
72	Diffusion Impaired (≤80% DLCO)	Severe Restriction (≤50% TLC)	Baseline Long COVID Clinic Visit	Consolidation	0
72	Diffusion Impaired (≤80% DLCO)	Severe Restriction (≤50% TLC)	Baseline Long COVID Clinic Visit	Emphysema	0
74	Diffusion Impaired (≤80% DLCO)	Moderate Restriction (51-70% TLC)	Baseline Long COVID Clinic Visit	Ground Glass Opacities	1
74	Diffusion Impaired (≤80% DLCO)	Moderate Restriction (51-70% TLC)	Baseline Long COVID Clinic Visit	Reticulations	1
74	Diffusion Impaired (≤80% DLCO)	Moderate Restriction (51-70% TLC)	Baseline Long COVID Clinic Visit	Other Fibrosis	1
74	Diffusion Impaired (≤80% DLCO)	Moderate Restriction (51-70% TLC)	Baseline Long COVID Clinic Visit	Bronchiectasis	1
74	Diffusion Impaired (≤80% DLCO)	Moderate Restriction (51-70% TLC)	Baseline Long COVID Clinic Visit	Consolidation	0
74	Diffusion Impaired (≤80% DLCO)	Moderate Restriction (51-70% TLC)	Baseline Long COVID Clinic Visit	Emphysema	0
75	Diffusion Impaired (≤80% DLCO)	Moderate Restriction (51-70% TLC)	Baseline Long COVID Clinic Visit	Ground Glass Opacities	1
75	Diffusion Impaired (≤80% DLCO)	Moderate Restriction (51-70% TLC)	Baseline Long COVID Clinic Visit	Reticulations	1
75	Diffusion Impaired (≤80% DLCO)	Moderate Restriction (51-70% TLC)	Baseline Long COVID Clinic Visit	Other Fibrosis	1
75	Diffusion Impaired (≤80% DLCO)	Moderate Restriction (51-70% TLC)	Baseline Long COVID Clinic Visit	Bronchiectasis	0
75	Diffusion Impaired (≤80% DLCO)	Moderate Restriction (51-70% TLC)	Baseline Long COVID Clinic Visit	Consolidation	1
75	Diffusion Impaired (≤80% DLCO)	Moderate Restriction (51-70% TLC)	Baseline Long COVID Clinic Visit	Emphysema	1
76	Diffusion Impaired (≤80% DLCO)	Severe Restriction (≤50% TLC)	Baseline Long COVID Clinic Visit	Ground Glass Opacities	0
76	Diffusion Impaired (≤80% DLCO)	Severe Restriction (≤50% TLC)	Baseline Long COVID Clinic Visit	Reticulations	0
76	Diffusion Impaired (≤80% DLCO)	Severe Restriction (≤50% TLC)	Baseline Long COVID Clinic Visit	Other Fibrosis	0
76	Diffusion Impaired (≤80% DLCO)	Severe Restriction (≤50% TLC)	Baseline Long COVID Clinic Visit	Bronchiectasis	0
76	Diffusion Impaired (≤80% DLCO)	Severe Restriction (≤50% TLC)	Baseline Long COVID Clinic Visit	Consolidation	0
76	Diffusion Impaired (≤80% DLCO)	Severe Restriction (≤50% TLC)	Baseline Long COVID Clinic Visit	Emphysema	0
77	Diffusion Impaired (≤80% DLCO)	Mild Restriction (71-80% TLC)	Baseline Long COVID Clinic Visit	Ground Glass Opacities	1
77	Diffusion Impaired (≤80% DLCO)	Mild Restriction (71-80% TLC)	Baseline Long COVID Clinic Visit	Reticulations	1
77	Diffusion Impaired (≤80% DLCO)	Mild Restriction (71-80% TLC)	Baseline Long COVID Clinic Visit	Other Fibrosis	0
77	Diffusion Impaired (≤80% DLCO)	Mild Restriction (71-80% TLC)	Baseline Long COVID Clinic Visit	Bronchiectasis	0
77	Diffusion Impaired (≤80% DLCO)	Mild Restriction (71-80% TLC)	Baseline Long COVID Clinic Visit	Consolidation	0
77	Diffusion Impaired (≤80% DLCO)	Mild Restriction (71-80% TLC)	Baseline Long COVID Clinic Visit	Emphysema	0
78	Diffusion Impaired (≤80% DLCO)	Moderate Restriction (51-70% TLC)	Baseline Long COVID Clinic Visit	Ground Glass Opacities	0
78	Diffusion Impaired (≤80% DLCO)	Moderate Restriction (51-70% TLC)	Baseline Long COVID Clinic Visit	Reticulations	0
78	Diffusion Impaired (≤80% DLCO)	Moderate Restriction (51-70% TLC)	Baseline Long COVID Clinic Visit	Other Fibrosis	0
78	Diffusion Impaired (≤80% DLCO)	Moderate Restriction (51-70% TLC)	Baseline Long COVID Clinic Visit	Bronchiectasis	0
78	Diffusion Impaired (≤80% DLCO)	Moderate Restriction (51-70% TLC)	Baseline Long COVID Clinic Visit	Consolidation	0
78	Diffusion Impaired (≤80% DLCO)	Moderate Restriction (51-70% TLC)	Baseline Long COVID Clinic Visit	Emphysema	0
79	Diffusion Impaired (≤80% DLCO)	No Restriction (>80% TLC)	Baseline Long COVID Clinic Visit	Ground Glass Opacities	1
79	Diffusion Impaired (≤80% DLCO)	No Restriction (>80% TLC)	Baseline Long COVID Clinic Visit	Reticulations	1
79	Diffusion Impaired (≤80% DLCO)	No Restriction (>80% TLC)	Baseline Long COVID Clinic Visit	Other Fibrosis	1
79	Diffusion Impaired (≤80% DLCO)	No Restriction (>80% TLC)	Baseline Long COVID Clinic Visit	Bronchiectasis	1
79	Diffusion Impaired (≤80% DLCO)	No Restriction (>80% TLC)	Baseline Long COVID Clinic Visit	Consolidation	0
79	Diffusion Impaired (≤80% DLCO)	No Restriction (>80% TLC)	Baseline Long COVID Clinic Visit	Emphysema	0
80	Diffusion Impaired (≤80% DLCO)	Mild Restriction (71-80% TLC)	Baseline Long COVID Clinic Visit	Ground Glass Opacities	1
80	Diffusion Impaired (≤80% DLCO)	Mild Restriction (71-80% TLC)	Baseline Long COVID Clinic Visit	Reticulations	1
80	Diffusion Impaired (≤80% DLCO)	Mild Restriction (71-80% TLC)	Baseline Long COVID Clinic Visit	Other Fibrosis	0
80	Diffusion Impaired (≤80% DLCO)	Mild Restriction (71-80% TLC)	Baseline Long COVID Clinic Visit	Bronchiectasis	1
80	Diffusion Impaired (≤80% DLCO)	Mild Restriction (71-80% TLC)	Baseline Long COVID Clinic Visit	Consolidation	0
80	Diffusion Impaired (≤80% DLCO)	Mild Restriction (71-80% TLC)	Baseline Long COVID Clinic Visit	Emphysema	0
81	Diffusion Impaired (≤80% DLCO)	Moderate Restriction (51-70% TLC)	Baseline Long COVID Clinic Visit	Ground Glass Opacities	0
81	Diffusion Impaired (≤80% DLCO)	Moderate Restriction (51-70% TLC)	Baseline Long COVID Clinic Visit	Reticulations	0
81	Diffusion Impaired (≤80% DLCO)	Moderate Restriction (51-70% TLC)	Baseline Long COVID Clinic Visit	Other Fibrosis	0
81	Diffusion Impaired (≤80% DLCO)	Moderate Restriction (51-70% TLC)	Baseline Long COVID Clinic Visit	Bronchiectasis	0
81	Diffusion Impaired (≤80% DLCO)	Moderate Restriction (51-70% TLC)	Baseline Long COVID Clinic Visit	Consolidation	0
81	Diffusion Impaired (≤80% DLCO)	Moderate Restriction (51-70% TLC)	Baseline Long COVID Clinic Visit	Emphysema	0
82	Diffusion Impaired (≤80% DLCO)	Moderate Restriction (51-70% TLC)	Baseline Long COVID Clinic Visit	Ground Glass Opacities	0
82	Diffusion Impaired (≤80% DLCO)	Moderate Restriction (51-70% TLC)	Baseline Long COVID Clinic Visit	Reticulations	1
82	Diffusion Impaired (≤80% DLCO)	Moderate Restriction (51-70% TLC)	Baseline Long COVID Clinic Visit	Other Fibrosis	0
82	Diffusion Impaired (≤80% DLCO)	Moderate Restriction (51-70% TLC)	Baseline Long COVID Clinic Visit	Bronchiectasis	0
82	Diffusion Impaired (≤80% DLCO)	Moderate Restriction (51-70% TLC)	Baseline Long COVID Clinic Visit	Consolidation	0
82	Diffusion Impaired (≤80% DLCO)	Moderate Restriction (51-70% TLC)	Baseline Long COVID Clinic Visit	Emphysema	0
83	Diffusion Impaired (≤80% DLCO)	Severe Restriction (≤50% TLC)	Baseline Long COVID Clinic Visit	Ground Glass Opacities	1
83	Diffusion Impaired (≤80% DLCO)	Severe Restriction (≤50% TLC)	Baseline Long COVID Clinic Visit	Reticulations	1
83	Diffusion Impaired (≤80% DLCO)	Severe Restriction (≤50% TLC)	Baseline Long COVID Clinic Visit	Other Fibrosis	1
83	Diffusion Impaired (≤80% DLCO)	Severe Restriction (≤50% TLC)	Baseline Long COVID Clinic Visit	Bronchiectasis	1
83	Diffusion Impaired (≤80% DLCO)	Severe Restriction (≤50% TLC)	Baseline Long COVID Clinic Visit	Consolidation	0
83	Diffusion Impaired (≤80% DLCO)	Severe Restriction (≤50% TLC)	Baseline Long COVID Clinic Visit	Emphysema	0
85	Diffusion Impaired (≤80% DLCO)	Moderate Restriction (51-70% TLC)	Baseline Long COVID Clinic Visit	Ground Glass Opacities	0
85	Diffusion Impaired (≤80% DLCO)	Moderate Restriction (51-70% TLC)	Baseline Long COVID Clinic Visit	Reticulations	0
85	Diffusion Impaired (≤80% DLCO)	Moderate Restriction (51-70% TLC)	Baseline Long COVID Clinic Visit	Other Fibrosis	0
85	Diffusion Impaired (≤80% DLCO)	Moderate Restriction (51-70% TLC)	Baseline Long COVID Clinic Visit	Bronchiectasis	0
85	Diffusion Impaired (≤80% DLCO)	Moderate Restriction (51-70% TLC)	Baseline Long COVID Clinic Visit	Consolidation	0
85	Diffusion Impaired (≤80% DLCO)	Moderate Restriction (51-70% TLC)	Baseline Long COVID Clinic Visit	Emphysema	0
86	Diffusion Impaired (≤80% DLCO)	Severe Restriction (≤50% TLC)	Baseline Long COVID Clinic Visit	Ground Glass Opacities	0
86	Diffusion Impaired (≤80% DLCO)	Severe Restriction (≤50% TLC)	Baseline Long COVID Clinic Visit	Reticulations	1
86	Diffusion Impaired (≤80% DLCO)	Severe Restriction (≤50% TLC)	Baseline Long COVID Clinic Visit	Other Fibrosis	1
86	Diffusion Impaired (≤80% DLCO)	Severe Restriction (≤50% TLC)	Baseline Long COVID Clinic Visit	Bronchiectasis	1
86	Diffusion Impaired (≤80% DLCO)	Severe Restriction (≤50% TLC)	Baseline Long COVID Clinic Visit	Consolidation	0
86	Diffusion Impaired (≤80% DLCO)	Severe Restriction (≤50% TLC)	Baseline Long COVID Clinic Visit	Emphysema	0
87	Diffusion Impaired (≤80% DLCO)	Severe Restriction (≤50% TLC)	Baseline Long COVID Clinic Visit	Ground Glass Opacities	1
87	Diffusion Impaired (≤80% DLCO)	Severe Restriction (≤50% TLC)	Baseline Long COVID Clinic Visit	Reticulations	1
87	Diffusion Impaired (≤80% DLCO)	Severe Restriction (≤50% TLC)	Baseline Long COVID Clinic Visit	Other Fibrosis	1
87	Diffusion Impaired (≤80% DLCO)	Severe Restriction (≤50% TLC)	Baseline Long COVID Clinic Visit	Bronchiectasis	1
87	Diffusion Impaired (≤80% DLCO)	Severe Restriction (≤50% TLC)	Baseline Long COVID Clinic Visit	Consolidation	0
87	Diffusion Impaired (≤80% DLCO)	Severe Restriction (≤50% TLC)	Baseline Long COVID Clinic Visit	Emphysema	0
88	Diffusion Impaired (≤80% DLCO)	Severe Restriction (≤50% TLC)	Baseline Long COVID Clinic Visit	Ground Glass Opacities	1
88	Diffusion Impaired (≤80% DLCO)	Severe Restriction (≤50% TLC)	Baseline Long COVID Clinic Visit	Reticulations	1
88	Diffusion Impaired (≤80% DLCO)	Severe Restriction (≤50% TLC)	Baseline Long COVID Clinic Visit	Other Fibrosis	0
88	Diffusion Impaired (≤80% DLCO)	Severe Restriction (≤50% TLC)	Baseline Long COVID Clinic Visit	Bronchiectasis	0
88	Diffusion Impaired (≤80% DLCO)	Severe Restriction (≤50% TLC)	Baseline Long COVID Clinic Visit	Consolidation	0
88	Diffusion Impaired (≤80% DLCO)	Severe Restriction (≤50% TLC)	Baseline Long COVID Clinic Visit	Emphysema	1
89	Diffusion Impaired (≤80% DLCO)	Moderate Restriction (51-70% TLC)	Baseline Long COVID Clinic Visit	Ground Glass Opacities	1
89	Diffusion Impaired (≤80% DLCO)	Moderate Restriction (51-70% TLC)	Baseline Long COVID Clinic Visit	Reticulations	1
89	Diffusion Impaired (≤80% DLCO)	Moderate Restriction (51-70% TLC)	Baseline Long COVID Clinic Visit	Other Fibrosis	0
89	Diffusion Impaired (≤80% DLCO)	Moderate Restriction (51-70% TLC)	Baseline Long COVID Clinic Visit	Bronchiectasis	0
89	Diffusion Impaired (≤80% DLCO)	Moderate Restriction (51-70% TLC)	Baseline Long COVID Clinic Visit	Consolidation	0
89	Diffusion Impaired (≤80% DLCO)	Moderate Restriction (51-70% TLC)	Baseline Long COVID Clinic Visit	Emphysema	1
90	Diffusion Impaired (≤80% DLCO)	Moderate Restriction (51-70% TLC)	Baseline Long COVID Clinic Visit	Ground Glass Opacities	0
90	Diffusion Impaired (≤80% DLCO)	Moderate Restriction (51-70% TLC)	Baseline Long COVID Clinic Visit	Reticulations	0
90	Diffusion Impaired (≤80% DLCO)	Moderate Restriction (51-70% TLC)	Baseline Long COVID Clinic Visit	Other Fibrosis	0
90	Diffusion Impaired (≤80% DLCO)	Moderate Restriction (51-70% TLC)	Baseline Long COVID Clinic Visit	Bronchiectasis	0
90	Diffusion Impaired (≤80% DLCO)	Moderate Restriction (51-70% TLC)	Baseline Long COVID Clinic Visit	Consolidation	0
90	Diffusion Impaired (≤80% DLCO)	Moderate Restriction (51-70% TLC)	Baseline Long COVID Clinic Visit	Emphysema	0
91	Diffusion Impaired (≤80% DLCO)	Moderate Restriction (51-70% TLC)	Baseline Long COVID Clinic Visit	Ground Glass Opacities	1
91	Diffusion Impaired (≤80% DLCO)	Moderate Restriction (51-70% TLC)	Baseline Long COVID Clinic Visit	Reticulations	1
91	Diffusion Impaired (≤80% DLCO)	Moderate Restriction (51-70% TLC)	Baseline Long COVID Clinic Visit	Other Fibrosis	1
91	Diffusion Impaired (≤80% DLCO)	Moderate Restriction (51-70% TLC)	Baseline Long COVID Clinic Visit	Bronchiectasis	1
91	Diffusion Impaired (≤80% DLCO)	Moderate Restriction (51-70% TLC)	Baseline Long COVID Clinic Visit	Consolidation	0
91	Diffusion Impaired (≤80% DLCO)	Moderate Restriction (51-70% TLC)	Baseline Long COVID Clinic Visit	Emphysema	0
93	Diffusion Impaired (≤80% DLCO)	Severe Restriction (≤50% TLC)	Baseline Long COVID Clinic Visit	Ground Glass Opacities	1
93	Diffusion Impaired (≤80% DLCO)	Severe Restriction (≤50% TLC)	Baseline Long COVID Clinic Visit	Reticulations	1
93	Diffusion Impaired (≤80% DLCO)	Severe Restriction (≤50% TLC)	Baseline Long COVID Clinic Visit	Other Fibrosis	1
93	Diffusion Impaired (≤80% DLCO)	Severe Restriction (≤50% TLC)	Baseline Long COVID Clinic Visit	Bronchiectasis	1
93	Diffusion Impaired (≤80% DLCO)	Severe Restriction (≤50% TLC)	Baseline Long COVID Clinic Visit	Consolidation	0
93	Diffusion Impaired (≤80% DLCO)	Severe Restriction (≤50% TLC)	Baseline Long COVID Clinic Visit	Emphysema	0
94	Diffusion Impaired (≤80% DLCO)	Moderate Restriction (51-70% TLC)	Baseline Long COVID Clinic Visit	Ground Glass Opacities	1
94	Diffusion Impaired (≤80% DLCO)	Moderate Restriction (51-70% TLC)	Baseline Long COVID Clinic Visit	Reticulations	1
94	Diffusion Impaired (≤80% DLCO)	Moderate Restriction (51-70% TLC)	Baseline Long COVID Clinic Visit	Other Fibrosis	1
94	Diffusion Impaired (≤80% DLCO)	Moderate Restriction (51-70% TLC)	Baseline Long COVID Clinic Visit	Bronchiectasis	1
94	Diffusion Impaired (≤80% DLCO)	Moderate Restriction (51-70% TLC)	Baseline Long COVID Clinic Visit	Consolidation	0
94	Diffusion Impaired (≤80% DLCO)	Moderate Restriction (51-70% TLC)	Baseline Long COVID Clinic Visit	Emphysema	0
97	Diffusion Impaired (≤80% DLCO)	Severe Restriction (≤50% TLC)	Baseline Long COVID Clinic Visit	Ground Glass Opacities	1
97	Diffusion Impaired (≤80% DLCO)	Severe Restriction (≤50% TLC)	Baseline Long COVID Clinic Visit	Reticulations	1
97	Diffusion Impaired (≤80% DLCO)	Severe Restriction (≤50% TLC)	Baseline Long COVID Clinic Visit	Other Fibrosis	0
97	Diffusion Impaired (≤80% DLCO)	Severe Restriction (≤50% TLC)	Baseline Long COVID Clinic Visit	Bronchiectasis	1
97	Diffusion Impaired (≤80% DLCO)	Severe Restriction (≤50% TLC)	Baseline Long COVID Clinic Visit	Consolidation	0
97	Diffusion Impaired (≤80% DLCO)	Severe Restriction (≤50% TLC)	Baseline Long COVID Clinic Visit	Emphysema	0
98	Diffusion Impaired (≤80% DLCO)	No Restriction (>80% TLC)	Baseline Long COVID Clinic Visit	Ground Glass Opacities	0
98	Diffusion Impaired (≤80% DLCO)	No Restriction (>80% TLC)	Baseline Long COVID Clinic Visit	Reticulations	0
98	Diffusion Impaired (≤80% DLCO)	No Restriction (>80% TLC)	Baseline Long COVID Clinic Visit	Other Fibrosis	0
98	Diffusion Impaired (≤80% DLCO)	No Restriction (>80% TLC)	Baseline Long COVID Clinic Visit	Bronchiectasis	0
98	Diffusion Impaired (≤80% DLCO)	No Restriction (>80% TLC)	Baseline Long COVID Clinic Visit	Consolidation	0
98	Diffusion Impaired (≤80% DLCO)	No Restriction (>80% TLC)	Baseline Long COVID Clinic Visit	Emphysema	0
99	Diffusion Impaired (≤80% DLCO)	Mild Restriction (71-80% TLC)	Baseline Long COVID Clinic Visit	Ground Glass Opacities	1
99	Diffusion Impaired (≤80% DLCO)	Mild Restriction (71-80% TLC)	Baseline Long COVID Clinic Visit	Reticulations	0
99	Diffusion Impaired (≤80% DLCO)	Mild Restriction (71-80% TLC)	Baseline Long COVID Clinic Visit	Other Fibrosis	0
99	Diffusion Impaired (≤80% DLCO)	Mild Restriction (71-80% TLC)	Baseline Long COVID Clinic Visit	Bronchiectasis	0
99	Diffusion Impaired (≤80% DLCO)	Mild Restriction (71-80% TLC)	Baseline Long COVID Clinic Visit	Consolidation	0
99	Diffusion Impaired (≤80% DLCO)	Mild Restriction (71-80% TLC)	Baseline Long COVID Clinic Visit	Emphysema	0
100	Diffusion Impaired (≤80% DLCO)	Severe Restriction (≤50% TLC)	Baseline Long COVID Clinic Visit	Ground Glass Opacities	1
100	Diffusion Impaired (≤80% DLCO)	Severe Restriction (≤50% TLC)	Baseline Long COVID Clinic Visit	Reticulations	1
100	Diffusion Impaired (≤80% DLCO)	Severe Restriction (≤50% TLC)	Baseline Long COVID Clinic Visit	Other Fibrosis	1
100	Diffusion Impaired (≤80% DLCO)	Severe Restriction (≤50% TLC)	Baseline Long COVID Clinic Visit	Bronchiectasis	1
100	Diffusion Impaired (≤80% DLCO)	Severe Restriction (≤50% TLC)	Baseline Long COVID Clinic Visit	Consolidation	0
100	Diffusion Impaired (≤80% DLCO)	Severe Restriction (≤50% TLC)	Baseline Long COVID Clinic Visit	Emphysema	1
101	Diffusion Impaired (≤80% DLCO)	Moderate Restriction (51-70% TLC)	Baseline Long COVID Clinic Visit	Ground Glass Opacities	1
101	Diffusion Impaired (≤80% DLCO)	Moderate Restriction (51-70% TLC)	Baseline Long COVID Clinic Visit	Reticulations	0
101	Diffusion Impaired (≤80% DLCO)	Moderate Restriction (51-70% TLC)	Baseline Long COVID Clinic Visit	Other Fibrosis	0
101	Diffusion Impaired (≤80% DLCO)	Moderate Restriction (51-70% TLC)	Baseline Long COVID Clinic Visit	Bronchiectasis	0
101	Diffusion Impaired (≤80% DLCO)	Moderate Restriction (51-70% TLC)	Baseline Long COVID Clinic Visit	Consolidation	0
101	Diffusion Impaired (≤80% DLCO)	Moderate Restriction (51-70% TLC)	Baseline Long COVID Clinic Visit	Emphysema	1
102	Diffusion Impaired (≤80% DLCO)	Moderate Restriction (51-70% TLC)	Baseline Long COVID Clinic Visit	Ground Glass Opacities	0
102	Diffusion Impaired (≤80% DLCO)	Moderate Restriction (51-70% TLC)	Baseline Long COVID Clinic Visit	Reticulations	0
102	Diffusion Impaired (≤80% DLCO)	Moderate Restriction (51-70% TLC)	Baseline Long COVID Clinic Visit	Other Fibrosis	0
102	Diffusion Impaired (≤80% DLCO)	Moderate Restriction (51-70% TLC)	Baseline Long COVID Clinic Visit	Bronchiectasis	0
102	Diffusion Impaired (≤80% DLCO)	Moderate Restriction (51-70% TLC)	Baseline Long COVID Clinic Visit	Consolidation	0
102	Diffusion Impaired (≤80% DLCO)	Moderate Restriction (51-70% TLC)	Baseline Long COVID Clinic Visit	Emphysema	1
103	Diffusion Impaired (≤80% DLCO)	Moderate Restriction (51-70% TLC)	Baseline Long COVID Clinic Visit	Ground Glass Opacities	1
103	Diffusion Impaired (≤80% DLCO)	Moderate Restriction (51-70% TLC)	Baseline Long COVID Clinic Visit	Reticulations	0
103	Diffusion Impaired (≤80% DLCO)	Moderate Restriction (51-70% TLC)	Baseline Long COVID Clinic Visit	Other Fibrosis	0
103	Diffusion Impaired (≤80% DLCO)	Moderate Restriction (51-70% TLC)	Baseline Long COVID Clinic Visit	Bronchiectasis	0
103	Diffusion Impaired (≤80% DLCO)	Moderate Restriction (51-70% TLC)	Baseline Long COVID Clinic Visit	Consolidation	0
103	Diffusion Impaired (≤80% DLCO)	Moderate Restriction (51-70% TLC)	Baseline Long COVID Clinic Visit	Emphysema	0
106	Diffusion Impaired (≤80% DLCO)	Moderate Restriction (51-70% TLC)	Baseline Long COVID Clinic Visit	Ground Glass Opacities	0
106	Diffusion Impaired (≤80% DLCO)	Moderate Restriction (51-70% TLC)	Baseline Long COVID Clinic Visit	Reticulations	0
106	Diffusion Impaired (≤80% DLCO)	Moderate Restriction (51-70% TLC)	Baseline Long COVID Clinic Visit	Other Fibrosis	0
106	Diffusion Impaired (≤80% DLCO)	Moderate Restriction (51-70% TLC)	Baseline Long COVID Clinic Visit	Bronchiectasis	0
106	Diffusion Impaired (≤80% DLCO)	Moderate Restriction (51-70% TLC)	Baseline Long COVID Clinic Visit	Consolidation	0
106	Diffusion Impaired (≤80% DLCO)	Moderate Restriction (51-70% TLC)	Baseline Long COVID Clinic Visit	Emphysema	0
107	Diffusion Impaired (≤80% DLCO)	Severe Restriction (≤50% TLC)	Baseline Long COVID Clinic Visit	Ground Glass Opacities	1
107	Diffusion Impaired (≤80% DLCO)	Severe Restriction (≤50% TLC)	Baseline Long COVID Clinic Visit	Reticulations	1
107	Diffusion Impaired (≤80% DLCO)	Severe Restriction (≤50% TLC)	Baseline Long COVID Clinic Visit	Other Fibrosis	1
107	Diffusion Impaired (≤80% DLCO)	Severe Restriction (≤50% TLC)	Baseline Long COVID Clinic Visit	Bronchiectasis	0
107	Diffusion Impaired (≤80% DLCO)	Severe Restriction (≤50% TLC)	Baseline Long COVID Clinic Visit	Consolidation	0
107	Diffusion Impaired (≤80% DLCO)	Severe Restriction (≤50% TLC)	Baseline Long COVID Clinic Visit	Emphysema	1
108	Diffusion Impaired (≤80% DLCO)	Moderate Restriction (51-70% TLC)	Baseline Long COVID Clinic Visit	Ground Glass Opacities	0
108	Diffusion Impaired (≤80% DLCO)	Moderate Restriction (51-70% TLC)	Baseline Long COVID Clinic Visit	Reticulations	1
108	Diffusion Impaired (≤80% DLCO)	Moderate Restriction (51-70% TLC)	Baseline Long COVID Clinic Visit	Other Fibrosis	0
108	Diffusion Impaired (≤80% DLCO)	Moderate Restriction (51-70% TLC)	Baseline Long COVID Clinic Visit	Bronchiectasis	0
108	Diffusion Impaired (≤80% DLCO)	Moderate Restriction (51-70% TLC)	Baseline Long COVID Clinic Visit	Consolidation	0
108	Diffusion Impaired (≤80% DLCO)	Moderate Restriction (51-70% TLC)	Baseline Long COVID Clinic Visit	Emphysema	0
110	Diffusion Impaired (≤80% DLCO)	Moderate Restriction (51-70% TLC)	Baseline Long COVID Clinic Visit	Ground Glass Opacities	0
110	Diffusion Impaired (≤80% DLCO)	Moderate Restriction (51-70% TLC)	Baseline Long COVID Clinic Visit	Reticulations	0
110	Diffusion Impaired (≤80% DLCO)	Moderate Restriction (51-70% TLC)	Baseline Long COVID Clinic Visit	Other Fibrosis	0
110	Diffusion Impaired (≤80% DLCO)	Moderate Restriction (51-70% TLC)	Baseline Long COVID Clinic Visit	Bronchiectasis	0
110	Diffusion Impaired (≤80% DLCO)	Moderate Restriction (51-70% TLC)	Baseline Long COVID Clinic Visit	Consolidation	0
110	Diffusion Impaired (≤80% DLCO)	Moderate Restriction (51-70% TLC)	Baseline Long COVID Clinic Visit	Emphysema	0
111	Diffusion Impaired (≤80% DLCO)	Severe Restriction (≤50% TLC)	Baseline Long COVID Clinic Visit	Ground Glass Opacities	0
111	Diffusion Impaired (≤80% DLCO)	Severe Restriction (≤50% TLC)	Baseline Long COVID Clinic Visit	Reticulations	1
111	Diffusion Impaired (≤80% DLCO)	Severe Restriction (≤50% TLC)	Baseline Long COVID Clinic Visit	Other Fibrosis	0
111	Diffusion Impaired (≤80% DLCO)	Severe Restriction (≤50% TLC)	Baseline Long COVID Clinic Visit	Bronchiectasis	1
111	Diffusion Impaired (≤80% DLCO)	Severe Restriction (≤50% TLC)	Baseline Long COVID Clinic Visit	Consolidation	0
111	Diffusion Impaired (≤80% DLCO)	Severe Restriction (≤50% TLC)	Baseline Long COVID Clinic Visit	Emphysema	0
112	Diffusion Impaired (≤80% DLCO)	Severe Restriction (≤50% TLC)	Baseline Long COVID Clinic Visit	Ground Glass Opacities	1
112	Diffusion Impaired (≤80% DLCO)	Severe Restriction (≤50% TLC)	Baseline Long COVID Clinic Visit	Reticulations	1
112	Diffusion Impaired (≤80% DLCO)	Severe Restriction (≤50% TLC)	Baseline Long COVID Clinic Visit	Other Fibrosis	1
112	Diffusion Impaired (≤80% DLCO)	Severe Restriction (≤50% TLC)	Baseline Long COVID Clinic Visit	Bronchiectasis	1
112	Diffusion Impaired (≤80% DLCO)	Severe Restriction (≤50% TLC)	Baseline Long COVID Clinic Visit	Consolidation	0
112	Diffusion Impaired (≤80% DLCO)	Severe Restriction (≤50% TLC)	Baseline Long COVID Clinic Visit	Emphysema	0
113	Diffusion Impaired (≤80% DLCO)	Moderate Restriction (51-70% TLC)	Baseline Long COVID Clinic Visit	Ground Glass Opacities	1
113	Diffusion Impaired (≤80% DLCO)	Moderate Restriction (51-70% TLC)	Baseline Long COVID Clinic Visit	Reticulations	1
113	Diffusion Impaired (≤80% DLCO)	Moderate Restriction (51-70% TLC)	Baseline Long COVID Clinic Visit	Other Fibrosis	1
113	Diffusion Impaired (≤80% DLCO)	Moderate Restriction (51-70% TLC)	Baseline Long COVID Clinic Visit	Bronchiectasis	1
113	Diffusion Impaired (≤80% DLCO)	Moderate Restriction (51-70% TLC)	Baseline Long COVID Clinic Visit	Consolidation	0
113	Diffusion Impaired (≤80% DLCO)	Moderate Restriction (51-70% TLC)	Baseline Long COVID Clinic Visit	Emphysema	0
116	Diffusion Impaired (≤80% DLCO)	Severe Restriction (≤50% TLC)	Baseline Long COVID Clinic Visit	Ground Glass Opacities	1
116	Diffusion Impaired (≤80% DLCO)	Severe Restriction (≤50% TLC)	Baseline Long COVID Clinic Visit	Reticulations	1
116	Diffusion Impaired (≤80% DLCO)	Severe Restriction (≤50% TLC)	Baseline Long COVID Clinic Visit	Other Fibrosis	1
116	Diffusion Impaired (≤80% DLCO)	Severe Restriction (≤50% TLC)	Baseline Long COVID Clinic Visit	Bronchiectasis	1
116	Diffusion Impaired (≤80% DLCO)	Severe Restriction (≤50% TLC)	Baseline Long COVID Clinic Visit	Consolidation	0
116	Diffusion Impaired (≤80% DLCO)	Severe Restriction (≤50% TLC)	Baseline Long COVID Clinic Visit	Emphysema	0
117	Diffusion Impaired (≤80% DLCO)	Severe Restriction (≤50% TLC)	Baseline Long COVID Clinic Visit	Ground Glass Opacities	0
117	Diffusion Impaired (≤80% DLCO)	Severe Restriction (≤50% TLC)	Baseline Long COVID Clinic Visit	Reticulations	0
117	Diffusion Impaired (≤80% DLCO)	Severe Restriction (≤50% TLC)	Baseline Long COVID Clinic Visit	Other Fibrosis	0
117	Diffusion Impaired (≤80% DLCO)	Severe Restriction (≤50% TLC)	Baseline Long COVID Clinic Visit	Bronchiectasis	0
117	Diffusion Impaired (≤80% DLCO)	Severe Restriction (≤50% TLC)	Baseline Long COVID Clinic Visit	Consolidation	0
117	Diffusion Impaired (≤80% DLCO)	Severe Restriction (≤50% TLC)	Baseline Long COVID Clinic Visit	Emphysema	0
118	Diffusion Impaired (≤80% DLCO)	No Restriction (>80% TLC)	Baseline Long COVID Clinic Visit	Ground Glass Opacities	1
118	Diffusion Impaired (≤80% DLCO)	No Restriction (>80% TLC)	Baseline Long COVID Clinic Visit	Reticulations	0
118	Diffusion Impaired (≤80% DLCO)	No Restriction (>80% TLC)	Baseline Long COVID Clinic Visit	Other Fibrosis	0
118	Diffusion Impaired (≤80% DLCO)	No Restriction (>80% TLC)	Baseline Long COVID Clinic Visit	Bronchiectasis	1
118	Diffusion Impaired (≤80% DLCO)	No Restriction (>80% TLC)	Baseline Long COVID Clinic Visit	Consolidation	0
118	Diffusion Impaired (≤80% DLCO)	No Restriction (>80% TLC)	Baseline Long COVID Clinic Visit	Emphysema	0
120	Diffusion Impaired (≤80% DLCO)	Mild Restriction (71-80% TLC)	Baseline Long COVID Clinic Visit	Ground Glass Opacities	0
120	Diffusion Impaired (≤80% DLCO)	Mild Restriction (71-80% TLC)	Baseline Long COVID Clinic Visit	Reticulations	0
120	Diffusion Impaired (≤80% DLCO)	Mild Restriction (71-80% TLC)	Baseline Long COVID Clinic Visit	Other Fibrosis	0
120	Diffusion Impaired (≤80% DLCO)	Mild Restriction (71-80% TLC)	Baseline Long COVID Clinic Visit	Bronchiectasis	0
120	Diffusion Impaired (≤80% DLCO)	Mild Restriction (71-80% TLC)	Baseline Long COVID Clinic Visit	Consolidation	0
120	Diffusion Impaired (≤80% DLCO)	Mild Restriction (71-80% TLC)	Baseline Long COVID Clinic Visit	Emphysema	0
121	Diffusion Impaired (≤80% DLCO)	Moderate Restriction (51-70% TLC)	Baseline Long COVID Clinic Visit	Ground Glass Opacities	1
121	Diffusion Impaired (≤80% DLCO)	Moderate Restriction (51-70% TLC)	Baseline Long COVID Clinic Visit	Reticulations	1
121	Diffusion Impaired (≤80% DLCO)	Moderate Restriction (51-70% TLC)	Baseline Long COVID Clinic Visit	Other Fibrosis	1
121	Diffusion Impaired (≤80% DLCO)	Moderate Restriction (51-70% TLC)	Baseline Long COVID Clinic Visit	Bronchiectasis	1
121	Diffusion Impaired (≤80% DLCO)	Moderate Restriction (51-70% TLC)	Baseline Long COVID Clinic Visit	Consolidation	0
121	Diffusion Impaired (≤80% DLCO)	Moderate Restriction (51-70% TLC)	Baseline Long COVID Clinic Visit	Emphysema	0
122	Diffusion Impaired (≤80% DLCO)	Severe Restriction (≤50% TLC)	Baseline Long COVID Clinic Visit	Ground Glass Opacities	1
122	Diffusion Impaired (≤80% DLCO)	Severe Restriction (≤50% TLC)	Baseline Long COVID Clinic Visit	Reticulations	1
122	Diffusion Impaired (≤80% DLCO)	Severe Restriction (≤50% TLC)	Baseline Long COVID Clinic Visit	Other Fibrosis	1
122	Diffusion Impaired (≤80% DLCO)	Severe Restriction (≤50% TLC)	Baseline Long COVID Clinic Visit	Bronchiectasis	1
122	Diffusion Impaired (≤80% DLCO)	Severe Restriction (≤50% TLC)	Baseline Long COVID Clinic Visit	Consolidation	0
122	Diffusion Impaired (≤80% DLCO)	Severe Restriction (≤50% TLC)	Baseline Long COVID Clinic Visit	Emphysema	0
123	Diffusion Impaired (≤80% DLCO)	Severe Restriction (≤50% TLC)	Baseline Long COVID Clinic Visit	Ground Glass Opacities	1
123	Diffusion Impaired (≤80% DLCO)	Severe Restriction (≤50% TLC)	Baseline Long COVID Clinic Visit	Reticulations	1
123	Diffusion Impaired (≤80% DLCO)	Severe Restriction (≤50% TLC)	Baseline Long COVID Clinic Visit	Other Fibrosis	1
123	Diffusion Impaired (≤80% DLCO)	Severe Restriction (≤50% TLC)	Baseline Long COVID Clinic Visit	Bronchiectasis	1
123	Diffusion Impaired (≤80% DLCO)	Severe Restriction (≤50% TLC)	Baseline Long COVID Clinic Visit	Consolidation	0
123	Diffusion Impaired (≤80% DLCO)	Severe Restriction (≤50% TLC)	Baseline Long COVID Clinic Visit	Emphysema	0
124	Diffusion Impaired (≤80% DLCO)	Moderate Restriction (51-70% TLC)	Baseline Long COVID Clinic Visit	Ground Glass Opacities	0
124	Diffusion Impaired (≤80% DLCO)	Moderate Restriction (51-70% TLC)	Baseline Long COVID Clinic Visit	Reticulations	1
124	Diffusion Impaired (≤80% DLCO)	Moderate Restriction (51-70% TLC)	Baseline Long COVID Clinic Visit	Other Fibrosis	1
124	Diffusion Impaired (≤80% DLCO)	Moderate Restriction (51-70% TLC)	Baseline Long COVID Clinic Visit	Bronchiectasis	0
124	Diffusion Impaired (≤80% DLCO)	Moderate Restriction (51-70% TLC)	Baseline Long COVID Clinic Visit	Consolidation	0
124	Diffusion Impaired (≤80% DLCO)	Moderate Restriction (51-70% TLC)	Baseline Long COVID Clinic Visit	Emphysema	0
125	Diffusion Impaired (≤80% DLCO)	Moderate Restriction (51-70% TLC)	Baseline Long COVID Clinic Visit	Ground Glass Opacities	1
125	Diffusion Impaired (≤80% DLCO)	Moderate Restriction (51-70% TLC)	Baseline Long COVID Clinic Visit	Reticulations	1
125	Diffusion Impaired (≤80% DLCO)	Moderate Restriction (51-70% TLC)	Baseline Long COVID Clinic Visit	Other Fibrosis	1
125	Diffusion Impaired (≤80% DLCO)	Moderate Restriction (51-70% TLC)	Baseline Long COVID Clinic Visit	Bronchiectasis	1
125	Diffusion Impaired (≤80% DLCO)	Moderate Restriction (51-70% TLC)	Baseline Long COVID Clinic Visit	Consolidation	0
125	Diffusion Impaired (≤80% DLCO)	Moderate Restriction (51-70% TLC)	Baseline Long COVID Clinic Visit	Emphysema	0
126	Diffusion Impaired (≤80% DLCO)	Severe Restriction (≤50% TLC)	Baseline Long COVID Clinic Visit	Ground Glass Opacities	1
126	Diffusion Impaired (≤80% DLCO)	Severe Restriction (≤50% TLC)	Baseline Long COVID Clinic Visit	Reticulations	1
126	Diffusion Impaired (≤80% DLCO)	Severe Restriction (≤50% TLC)	Baseline Long COVID Clinic Visit	Other Fibrosis	1
126	Diffusion Impaired (≤80% DLCO)	Severe Restriction (≤50% TLC)	Baseline Long COVID Clinic Visit	Bronchiectasis	1
126	Diffusion Impaired (≤80% DLCO)	Severe Restriction (≤50% TLC)	Baseline Long COVID Clinic Visit	Consolidation	0
126	Diffusion Impaired (≤80% DLCO)	Severe Restriction (≤50% TLC)	Baseline Long COVID Clinic Visit	Emphysema	0
127	Diffusion Impaired (≤80% DLCO)	No Restriction (>80% TLC)	Baseline Long COVID Clinic Visit	Ground Glass Opacities	1
127	Diffusion Impaired (≤80% DLCO)	No Restriction (>80% TLC)	Baseline Long COVID Clinic Visit	Reticulations	1
127	Diffusion Impaired (≤80% DLCO)	No Restriction (>80% TLC)	Baseline Long COVID Clinic Visit	Other Fibrosis	1
127	Diffusion Impaired (≤80% DLCO)	No Restriction (>80% TLC)	Baseline Long COVID Clinic Visit	Bronchiectasis	1
127	Diffusion Impaired (≤80% DLCO)	No Restriction (>80% TLC)	Baseline Long COVID Clinic Visit	Consolidation	0
127	Diffusion Impaired (≤80% DLCO)	No Restriction (>80% TLC)	Baseline Long COVID Clinic Visit	Emphysema	1
128	Diffusion Impaired (≤80% DLCO)	Severe Restriction (≤50% TLC)	Baseline Long COVID Clinic Visit	Ground Glass Opacities	1
128	Diffusion Impaired (≤80% DLCO)	Severe Restriction (≤50% TLC)	Baseline Long COVID Clinic Visit	Reticulations	1
128	Diffusion Impaired (≤80% DLCO)	Severe Restriction (≤50% TLC)	Baseline Long COVID Clinic Visit	Other Fibrosis	0
128	Diffusion Impaired (≤80% DLCO)	Severe Restriction (≤50% TLC)	Baseline Long COVID Clinic Visit	Bronchiectasis	0
128	Diffusion Impaired (≤80% DLCO)	Severe Restriction (≤50% TLC)	Baseline Long COVID Clinic Visit	Consolidation	0
128	Diffusion Impaired (≤80% DLCO)	Severe Restriction (≤50% TLC)	Baseline Long COVID Clinic Visit	Emphysema	0
129	Diffusion Impaired (≤80% DLCO)	Moderate Restriction (51-70% TLC)	Baseline Long COVID Clinic Visit	Ground Glass Opacities	1
129	Diffusion Impaired (≤80% DLCO)	Moderate Restriction (51-70% TLC)	Baseline Long COVID Clinic Visit	Reticulations	1
129	Diffusion Impaired (≤80% DLCO)	Moderate Restriction (51-70% TLC)	Baseline Long COVID Clinic Visit	Other Fibrosis	1
129	Diffusion Impaired (≤80% DLCO)	Moderate Restriction (51-70% TLC)	Baseline Long COVID Clinic Visit	Bronchiectasis	1
129	Diffusion Impaired (≤80% DLCO)	Moderate Restriction (51-70% TLC)	Baseline Long COVID Clinic Visit	Consolidation	0
129	Diffusion Impaired (≤80% DLCO)	Moderate Restriction (51-70% TLC)	Baseline Long COVID Clinic Visit	Emphysema	0
130	Diffusion Impaired (≤80% DLCO)	Moderate Restriction (51-70% TLC)	Baseline Long COVID Clinic Visit	Ground Glass Opacities	0
130	Diffusion Impaired (≤80% DLCO)	Moderate Restriction (51-70% TLC)	Baseline Long COVID Clinic Visit	Reticulations	0
130	Diffusion Impaired (≤80% DLCO)	Moderate Restriction (51-70% TLC)	Baseline Long COVID Clinic Visit	Other Fibrosis	0
130	Diffusion Impaired (≤80% DLCO)	Moderate Restriction (51-70% TLC)	Baseline Long COVID Clinic Visit	Bronchiectasis	0
130	Diffusion Impaired (≤80% DLCO)	Moderate Restriction (51-70% TLC)	Baseline Long COVID Clinic Visit	Consolidation	0
130	Diffusion Impaired (≤80% DLCO)	Moderate Restriction (51-70% TLC)	Baseline Long COVID Clinic Visit	Emphysema	0
131	Diffusion Impaired (≤80% DLCO)	Severe Restriction (≤50% TLC)	Baseline Long COVID Clinic Visit	Ground Glass Opacities	1
131	Diffusion Impaired (≤80% DLCO)	Severe Restriction (≤50% TLC)	Baseline Long COVID Clinic Visit	Reticulations	1
131	Diffusion Impaired (≤80% DLCO)	Severe Restriction (≤50% TLC)	Baseline Long COVID Clinic Visit	Other Fibrosis	1
131	Diffusion Impaired (≤80% DLCO)	Severe Restriction (≤50% TLC)	Baseline Long COVID Clinic Visit	Bronchiectasis	0
131	Diffusion Impaired (≤80% DLCO)	Severe Restriction (≤50% TLC)	Baseline Long COVID Clinic Visit	Consolidation	0
131	Diffusion Impaired (≤80% DLCO)	Severe Restriction (≤50% TLC)	Baseline Long COVID Clinic Visit	Emphysema	1
132	Diffusion Impaired (≤80% DLCO)	Severe Restriction (≤50% TLC)	Baseline Long COVID Clinic Visit	Ground Glass Opacities	1
132	Diffusion Impaired (≤80% DLCO)	Severe Restriction (≤50% TLC)	Baseline Long COVID Clinic Visit	Reticulations	1
132	Diffusion Impaired (≤80% DLCO)	Severe Restriction (≤50% TLC)	Baseline Long COVID Clinic Visit	Other Fibrosis	1
132	Diffusion Impaired (≤80% DLCO)	Severe Restriction (≤50% TLC)	Baseline Long COVID Clinic Visit	Bronchiectasis	1
132	Diffusion Impaired (≤80% DLCO)	Severe Restriction (≤50% TLC)	Baseline Long COVID Clinic Visit	Consolidation	0
132	Diffusion Impaired (≤80% DLCO)	Severe Restriction (≤50% TLC)	Baseline Long COVID Clinic Visit	Emphysema	1
133	Diffusion Impaired (≤80% DLCO)	Moderate Restriction (51-70% TLC)	Baseline Long COVID Clinic Visit	Ground Glass Opacities	1
133	Diffusion Impaired (≤80% DLCO)	Moderate Restriction (51-70% TLC)	Baseline Long COVID Clinic Visit	Reticulations	1
133	Diffusion Impaired (≤80% DLCO)	Moderate Restriction (51-70% TLC)	Baseline Long COVID Clinic Visit	Other Fibrosis	1
133	Diffusion Impaired (≤80% DLCO)	Moderate Restriction (51-70% TLC)	Baseline Long COVID Clinic Visit	Bronchiectasis	0
133	Diffusion Impaired (≤80% DLCO)	Moderate Restriction (51-70% TLC)	Baseline Long COVID Clinic Visit	Consolidation	0
133	Diffusion Impaired (≤80% DLCO)	Moderate Restriction (51-70% TLC)	Baseline Long COVID Clinic Visit	Emphysema	0
134	Diffusion Impaired (≤80% DLCO)	Severe Restriction (≤50% TLC)	Baseline Long COVID Clinic Visit	Ground Glass Opacities	0
134	Diffusion Impaired (≤80% DLCO)	Severe Restriction (≤50% TLC)	Baseline Long COVID Clinic Visit	Reticulations	0
134	Diffusion Impaired (≤80% DLCO)	Severe Restriction (≤50% TLC)	Baseline Long COVID Clinic Visit	Other Fibrosis	0
134	Diffusion Impaired (≤80% DLCO)	Severe Restriction (≤50% TLC)	Baseline Long COVID Clinic Visit	Bronchiectasis	1
134	Diffusion Impaired (≤80% DLCO)	Severe Restriction (≤50% TLC)	Baseline Long COVID Clinic Visit	Consolidation	0
134	Diffusion Impaired (≤80% DLCO)	Severe Restriction (≤50% TLC)	Baseline Long COVID Clinic Visit	Emphysema	0
135	Diffusion Impaired (≤80% DLCO)	Moderate Restriction (51-70% TLC)	Baseline Long COVID Clinic Visit	Ground Glass Opacities	1
135	Diffusion Impaired (≤80% DLCO)	Moderate Restriction (51-70% TLC)	Baseline Long COVID Clinic Visit	Reticulations	1
135	Diffusion Impaired (≤80% DLCO)	Moderate Restriction (51-70% TLC)	Baseline Long COVID Clinic Visit	Other Fibrosis	1
135	Diffusion Impaired (≤80% DLCO)	Moderate Restriction (51-70% TLC)	Baseline Long COVID Clinic Visit	Bronchiectasis	1
135	Diffusion Impaired (≤80% DLCO)	Moderate Restriction (51-70% TLC)	Baseline Long COVID Clinic Visit	Consolidation	1
135	Diffusion Impaired (≤80% DLCO)	Moderate Restriction (51-70% TLC)	Baseline Long COVID Clinic Visit	Emphysema	0
136	Diffusion Impaired (≤80% DLCO)	Mild Restriction (71-80% TLC)	Baseline Long COVID Clinic Visit	Ground Glass Opacities	1
136	Diffusion Impaired (≤80% DLCO)	Mild Restriction (71-80% TLC)	Baseline Long COVID Clinic Visit	Reticulations	0
136	Diffusion Impaired (≤80% DLCO)	Mild Restriction (71-80% TLC)	Baseline Long COVID Clinic Visit	Other Fibrosis	0
136	Diffusion Impaired (≤80% DLCO)	Mild Restriction (71-80% TLC)	Baseline Long COVID Clinic Visit	Bronchiectasis	1
136	Diffusion Impaired (≤80% DLCO)	Mild Restriction (71-80% TLC)	Baseline Long COVID Clinic Visit	Consolidation	0
136	Diffusion Impaired (≤80% DLCO)	Mild Restriction (71-80% TLC)	Baseline Long COVID Clinic Visit	Emphysema	1
137	Diffusion Impaired (≤80% DLCO)	Moderate Restriction (51-70% TLC)	Baseline Long COVID Clinic Visit	Ground Glass Opacities	1
137	Diffusion Impaired (≤80% DLCO)	Moderate Restriction (51-70% TLC)	Baseline Long COVID Clinic Visit	Reticulations	1
137	Diffusion Impaired (≤80% DLCO)	Moderate Restriction (51-70% TLC)	Baseline Long COVID Clinic Visit	Other Fibrosis	1
137	Diffusion Impaired (≤80% DLCO)	Moderate Restriction (51-70% TLC)	Baseline Long COVID Clinic Visit	Bronchiectasis	1
137	Diffusion Impaired (≤80% DLCO)	Moderate Restriction (51-70% TLC)	Baseline Long COVID Clinic Visit	Consolidation	0
137	Diffusion Impaired (≤80% DLCO)	Moderate Restriction (51-70% TLC)	Baseline Long COVID Clinic Visit	Emphysema	1
139	Diffusion Impaired (≤80% DLCO)	Moderate Restriction (51-70% TLC)	Baseline Long COVID Clinic Visit	Ground Glass Opacities	1
139	Diffusion Impaired (≤80% DLCO)	Moderate Restriction (51-70% TLC)	Baseline Long COVID Clinic Visit	Reticulations	1
139	Diffusion Impaired (≤80% DLCO)	Moderate Restriction (51-70% TLC)	Baseline Long COVID Clinic Visit	Other Fibrosis	0
139	Diffusion Impaired (≤80% DLCO)	Moderate Restriction (51-70% TLC)	Baseline Long COVID Clinic Visit	Bronchiectasis	0
139	Diffusion Impaired (≤80% DLCO)	Moderate Restriction (51-70% TLC)	Baseline Long COVID Clinic Visit	Consolidation	0
139	Diffusion Impaired (≤80% DLCO)	Moderate Restriction (51-70% TLC)	Baseline Long COVID Clinic Visit	Emphysema	1
141	Diffusion Impaired (≤80% DLCO)	Moderate Restriction (51-70% TLC)	Baseline Long COVID Clinic Visit	Ground Glass Opacities	0
141	Diffusion Impaired (≤80% DLCO)	Moderate Restriction (51-70% TLC)	Baseline Long COVID Clinic Visit	Reticulations	0
141	Diffusion Impaired (≤80% DLCO)	Moderate Restriction (51-70% TLC)	Baseline Long COVID Clinic Visit	Other Fibrosis	0
141	Diffusion Impaired (≤80% DLCO)	Moderate Restriction (51-70% TLC)	Baseline Long COVID Clinic Visit	Bronchiectasis	1
141	Diffusion Impaired (≤80% DLCO)	Moderate Restriction (51-70% TLC)	Baseline Long COVID Clinic Visit	Consolidation	0
141	Diffusion Impaired (≤80% DLCO)	Moderate Restriction (51-70% TLC)	Baseline Long COVID Clinic Visit	Emphysema	0
142	Diffusion Impaired (≤80% DLCO)	Mild Restriction (71-80% TLC)	Baseline Long COVID Clinic Visit	Ground Glass Opacities	1
142	Diffusion Impaired (≤80% DLCO)	Mild Restriction (71-80% TLC)	Baseline Long COVID Clinic Visit	Reticulations	0
142	Diffusion Impaired (≤80% DLCO)	Mild Restriction (71-80% TLC)	Baseline Long COVID Clinic Visit	Other Fibrosis	0
142	Diffusion Impaired (≤80% DLCO)	Mild Restriction (71-80% TLC)	Baseline Long COVID Clinic Visit	Bronchiectasis	1
142	Diffusion Impaired (≤80% DLCO)	Mild Restriction (71-80% TLC)	Baseline Long COVID Clinic Visit	Consolidation	0
142	Diffusion Impaired (≤80% DLCO)	Mild Restriction (71-80% TLC)	Baseline Long COVID Clinic Visit	Emphysema	0
143	Diffusion Impaired (≤80% DLCO)	Moderate Restriction (51-70% TLC)	Baseline Long COVID Clinic Visit	Ground Glass Opacities	0
143	Diffusion Impaired (≤80% DLCO)	Moderate Restriction (51-70% TLC)	Baseline Long COVID Clinic Visit	Reticulations	0
143	Diffusion Impaired (≤80% DLCO)	Moderate Restriction (51-70% TLC)	Baseline Long COVID Clinic Visit	Other Fibrosis	0
143	Diffusion Impaired (≤80% DLCO)	Moderate Restriction (51-70% TLC)	Baseline Long COVID Clinic Visit	Bronchiectasis	0
143	Diffusion Impaired (≤80% DLCO)	Moderate Restriction (51-70% TLC)	Baseline Long COVID Clinic Visit	Consolidation	0
143	Diffusion Impaired (≤80% DLCO)	Moderate Restriction (51-70% TLC)	Baseline Long COVID Clinic Visit	Emphysema	0
144	Diffusion Impaired (≤80% DLCO)	Severe Restriction (≤50% TLC)	Baseline Long COVID Clinic Visit	Ground Glass Opacities	1
144	Diffusion Impaired (≤80% DLCO)	Severe Restriction (≤50% TLC)	Baseline Long COVID Clinic Visit	Reticulations	1
144	Diffusion Impaired (≤80% DLCO)	Severe Restriction (≤50% TLC)	Baseline Long COVID Clinic Visit	Other Fibrosis	1
144	Diffusion Impaired (≤80% DLCO)	Severe Restriction (≤50% TLC)	Baseline Long COVID Clinic Visit	Bronchiectasis	1
144	Diffusion Impaired (≤80% DLCO)	Severe Restriction (≤50% TLC)	Baseline Long COVID Clinic Visit	Consolidation	1
144	Diffusion Impaired (≤80% DLCO)	Severe Restriction (≤50% TLC)	Baseline Long COVID Clinic Visit	Emphysema	0
145	Diffusion Impaired (≤80% DLCO)	Moderate Restriction (51-70% TLC)	Baseline Long COVID Clinic Visit	Ground Glass Opacities	0
145	Diffusion Impaired (≤80% DLCO)	Moderate Restriction (51-70% TLC)	Baseline Long COVID Clinic Visit	Reticulations	0
145	Diffusion Impaired (≤80% DLCO)	Moderate Restriction (51-70% TLC)	Baseline Long COVID Clinic Visit	Other Fibrosis	0
145	Diffusion Impaired (≤80% DLCO)	Moderate Restriction (51-70% TLC)	Baseline Long COVID Clinic Visit	Bronchiectasis	0
145	Diffusion Impaired (≤80% DLCO)	Moderate Restriction (51-70% TLC)	Baseline Long COVID Clinic Visit	Consolidation	0
145	Diffusion Impaired (≤80% DLCO)	Moderate Restriction (51-70% TLC)	Baseline Long COVID Clinic Visit	Emphysema	0
146	Diffusion Impaired (≤80% DLCO)	Moderate Restriction (51-70% TLC)	Baseline Long COVID Clinic Visit	Ground Glass Opacities	1
146	Diffusion Impaired (≤80% DLCO)	Moderate Restriction (51-70% TLC)	Baseline Long COVID Clinic Visit	Reticulations	1
146	Diffusion Impaired (≤80% DLCO)	Moderate Restriction (51-70% TLC)	Baseline Long COVID Clinic Visit	Other Fibrosis	1
146	Diffusion Impaired (≤80% DLCO)	Moderate Restriction (51-70% TLC)	Baseline Long COVID Clinic Visit	Bronchiectasis	1
146	Diffusion Impaired (≤80% DLCO)	Moderate Restriction (51-70% TLC)	Baseline Long COVID Clinic Visit	Consolidation	0
146	Diffusion Impaired (≤80% DLCO)	Moderate Restriction (51-70% TLC)	Baseline Long COVID Clinic Visit	Emphysema	0
147	Diffusion Impaired (≤80% DLCO)	Moderate Restriction (51-70% TLC)	Baseline Long COVID Clinic Visit	Ground Glass Opacities	1
147	Diffusion Impaired (≤80% DLCO)	Moderate Restriction (51-70% TLC)	Baseline Long COVID Clinic Visit	Reticulations	0
147	Diffusion Impaired (≤80% DLCO)	Moderate Restriction (51-70% TLC)	Baseline Long COVID Clinic Visit	Other Fibrosis	0
147	Diffusion Impaired (≤80% DLCO)	Moderate Restriction (51-70% TLC)	Baseline Long COVID Clinic Visit	Bronchiectasis	1
147	Diffusion Impaired (≤80% DLCO)	Moderate Restriction (51-70% TLC)	Baseline Long COVID Clinic Visit	Consolidation	0
147	Diffusion Impaired (≤80% DLCO)	Moderate Restriction (51-70% TLC)	Baseline Long COVID Clinic Visit	Emphysema	0
149	Diffusion Impaired (≤80% DLCO)	No Restriction (>80% TLC)	Baseline Long COVID Clinic Visit	Ground Glass Opacities	1
149	Diffusion Impaired (≤80% DLCO)	No Restriction (>80% TLC)	Baseline Long COVID Clinic Visit	Reticulations	1
149	Diffusion Impaired (≤80% DLCO)	No Restriction (>80% TLC)	Baseline Long COVID Clinic Visit	Other Fibrosis	0
149	Diffusion Impaired (≤80% DLCO)	No Restriction (>80% TLC)	Baseline Long COVID Clinic Visit	Bronchiectasis	0
149	Diffusion Impaired (≤80% DLCO)	No Restriction (>80% TLC)	Baseline Long COVID Clinic Visit	Consolidation	0
149	Diffusion Impaired (≤80% DLCO)	No Restriction (>80% TLC)	Baseline Long COVID Clinic Visit	Emphysema	0
150	Diffusion Impaired (≤80% DLCO)	Severe Restriction (≤50% TLC)	Baseline Long COVID Clinic Visit	Ground Glass Opacities	1
150	Diffusion Impaired (≤80% DLCO)	Severe Restriction (≤50% TLC)	Baseline Long COVID Clinic Visit	Reticulations	1
150	Diffusion Impaired (≤80% DLCO)	Severe Restriction (≤50% TLC)	Baseline Long COVID Clinic Visit	Other Fibrosis	1
150	Diffusion Impaired (≤80% DLCO)	Severe Restriction (≤50% TLC)	Baseline Long COVID Clinic Visit	Bronchiectasis	1
150	Diffusion Impaired (≤80% DLCO)	Severe Restriction (≤50% TLC)	Baseline Long COVID Clinic Visit	Consolidation	0
150	Diffusion Impaired (≤80% DLCO)	Severe Restriction (≤50% TLC)	Baseline Long COVID Clinic Visit	Emphysema	0
152	Diffusion Impaired (≤80% DLCO)	Moderate Restriction (51-70% TLC)	Baseline Long COVID Clinic Visit	Ground Glass Opacities	1
152	Diffusion Impaired (≤80% DLCO)	Moderate Restriction (51-70% TLC)	Baseline Long COVID Clinic Visit	Reticulations	1
152	Diffusion Impaired (≤80% DLCO)	Moderate Restriction (51-70% TLC)	Baseline Long COVID Clinic Visit	Other Fibrosis	1
152	Diffusion Impaired (≤80% DLCO)	Moderate Restriction (51-70% TLC)	Baseline Long COVID Clinic Visit	Bronchiectasis	1
152	Diffusion Impaired (≤80% DLCO)	Moderate Restriction (51-70% TLC)	Baseline Long COVID Clinic Visit	Consolidation	0
152	Diffusion Impaired (≤80% DLCO)	Moderate Restriction (51-70% TLC)	Baseline Long COVID Clinic Visit	Emphysema	0
154	Diffusion Impaired (≤80% DLCO)	Moderate Restriction (51-70% TLC)	Baseline Long COVID Clinic Visit	Ground Glass Opacities	1
154	Diffusion Impaired (≤80% DLCO)	Moderate Restriction (51-70% TLC)	Baseline Long COVID Clinic Visit	Reticulations	1
154	Diffusion Impaired (≤80% DLCO)	Moderate Restriction (51-70% TLC)	Baseline Long COVID Clinic Visit	Other Fibrosis	0
154	Diffusion Impaired (≤80% DLCO)	Moderate Restriction (51-70% TLC)	Baseline Long COVID Clinic Visit	Bronchiectasis	0
154	Diffusion Impaired (≤80% DLCO)	Moderate Restriction (51-70% TLC)	Baseline Long COVID Clinic Visit	Consolidation	0
154	Diffusion Impaired (≤80% DLCO)	Moderate Restriction (51-70% TLC)	Baseline Long COVID Clinic Visit	Emphysema	0
155	Diffusion Impaired (≤80% DLCO)	Moderate Restriction (51-70% TLC)	Baseline Long COVID Clinic Visit	Ground Glass Opacities	1
155	Diffusion Impaired (≤80% DLCO)	Moderate Restriction (51-70% TLC)	Baseline Long COVID Clinic Visit	Reticulations	1
155	Diffusion Impaired (≤80% DLCO)	Moderate Restriction (51-70% TLC)	Baseline Long COVID Clinic Visit	Other Fibrosis	0
155	Diffusion Impaired (≤80% DLCO)	Moderate Restriction (51-70% TLC)	Baseline Long COVID Clinic Visit	Bronchiectasis	1
155	Diffusion Impaired (≤80% DLCO)	Moderate Restriction (51-70% TLC)	Baseline Long COVID Clinic Visit	Consolidation	0
155	Diffusion Impaired (≤80% DLCO)	Moderate Restriction (51-70% TLC)	Baseline Long COVID Clinic Visit	Emphysema	0
156	Diffusion Impaired (≤80% DLCO)	Moderate Restriction (51-70% TLC)	Baseline Long COVID Clinic Visit	Ground Glass Opacities	1
156	Diffusion Impaired (≤80% DLCO)	Moderate Restriction (51-70% TLC)	Baseline Long COVID Clinic Visit	Reticulations	1
156	Diffusion Impaired (≤80% DLCO)	Moderate Restriction (51-70% TLC)	Baseline Long COVID Clinic Visit	Other Fibrosis	0
156	Diffusion Impaired (≤80% DLCO)	Moderate Restriction (51-70% TLC)	Baseline Long COVID Clinic Visit	Bronchiectasis	1
156	Diffusion Impaired (≤80% DLCO)	Moderate Restriction (51-70% TLC)	Baseline Long COVID Clinic Visit	Consolidation	0
156	Diffusion Impaired (≤80% DLCO)	Moderate Restriction (51-70% TLC)	Baseline Long COVID Clinic Visit	Emphysema	0
157	Diffusion Impaired (≤80% DLCO)	Moderate Restriction (51-70% TLC)	Baseline Long COVID Clinic Visit	Ground Glass Opacities	1
157	Diffusion Impaired (≤80% DLCO)	Moderate Restriction (51-70% TLC)	Baseline Long COVID Clinic Visit	Reticulations	1
157	Diffusion Impaired (≤80% DLCO)	Moderate Restriction (51-70% TLC)	Baseline Long COVID Clinic Visit	Other Fibrosis	0
157	Diffusion Impaired (≤80% DLCO)	Moderate Restriction (51-70% TLC)	Baseline Long COVID Clinic Visit	Bronchiectasis	1
157	Diffusion Impaired (≤80% DLCO)	Moderate Restriction (51-70% TLC)	Baseline Long COVID Clinic Visit	Consolidation	0
157	Diffusion Impaired (≤80% DLCO)	Moderate Restriction (51-70% TLC)	Baseline Long COVID Clinic Visit	Emphysema	0
158	Diffusion Impaired (≤80% DLCO)	Moderate Restriction (51-70% TLC)	Baseline Long COVID Clinic Visit	Ground Glass Opacities	0
158	Diffusion Impaired (≤80% DLCO)	Moderate Restriction (51-70% TLC)	Baseline Long COVID Clinic Visit	Reticulations	1
158	Diffusion Impaired (≤80% DLCO)	Moderate Restriction (51-70% TLC)	Baseline Long COVID Clinic Visit	Other Fibrosis	0
158	Diffusion Impaired (≤80% DLCO)	Moderate Restriction (51-70% TLC)	Baseline Long COVID Clinic Visit	Bronchiectasis	0
158	Diffusion Impaired (≤80% DLCO)	Moderate Restriction (51-70% TLC)	Baseline Long COVID Clinic Visit	Consolidation	0
158	Diffusion Impaired (≤80% DLCO)	Moderate Restriction (51-70% TLC)	Baseline Long COVID Clinic Visit	Emphysema	0
159	Diffusion Impaired (≤80% DLCO)	Severe Restriction (≤50% TLC)	Baseline Long COVID Clinic Visit	Ground Glass Opacities	1
159	Diffusion Impaired (≤80% DLCO)	Severe Restriction (≤50% TLC)	Baseline Long COVID Clinic Visit	Reticulations	1
159	Diffusion Impaired (≤80% DLCO)	Severe Restriction (≤50% TLC)	Baseline Long COVID Clinic Visit	Other Fibrosis	1
159	Diffusion Impaired (≤80% DLCO)	Severe Restriction (≤50% TLC)	Baseline Long COVID Clinic Visit	Bronchiectasis	1
159	Diffusion Impaired (≤80% DLCO)	Severe Restriction (≤50% TLC)	Baseline Long COVID Clinic Visit	Consolidation	0
159	Diffusion Impaired (≤80% DLCO)	Severe Restriction (≤50% TLC)	Baseline Long COVID Clinic Visit	Emphysema	0
160	Diffusion Impaired (≤80% DLCO)	Moderate Restriction (51-70% TLC)	Baseline Long COVID Clinic Visit	Ground Glass Opacities	1
160	Diffusion Impaired (≤80% DLCO)	Moderate Restriction (51-70% TLC)	Baseline Long COVID Clinic Visit	Reticulations	1
160	Diffusion Impaired (≤80% DLCO)	Moderate Restriction (51-70% TLC)	Baseline Long COVID Clinic Visit	Other Fibrosis	1
160	Diffusion Impaired (≤80% DLCO)	Moderate Restriction (51-70% TLC)	Baseline Long COVID Clinic Visit	Bronchiectasis	1
160	Diffusion Impaired (≤80% DLCO)	Moderate Restriction (51-70% TLC)	Baseline Long COVID Clinic Visit	Consolidation	0
160	Diffusion Impaired (≤80% DLCO)	Moderate Restriction (51-70% TLC)	Baseline Long COVID Clinic Visit	Emphysema	0
161	Diffusion Impaired (≤80% DLCO)	Moderate Restriction (51-70% TLC)	Baseline Long COVID Clinic Visit	Ground Glass Opacities	1
161	Diffusion Impaired (≤80% DLCO)	Moderate Restriction (51-70% TLC)	Baseline Long COVID Clinic Visit	Reticulations	1
161	Diffusion Impaired (≤80% DLCO)	Moderate Restriction (51-70% TLC)	Baseline Long COVID Clinic Visit	Other Fibrosis	0
161	Diffusion Impaired (≤80% DLCO)	Moderate Restriction (51-70% TLC)	Baseline Long COVID Clinic Visit	Bronchiectasis	0
161	Diffusion Impaired (≤80% DLCO)	Moderate Restriction (51-70% TLC)	Baseline Long COVID Clinic Visit	Consolidation	1
161	Diffusion Impaired (≤80% DLCO)	Moderate Restriction (51-70% TLC)	Baseline Long COVID Clinic Visit	Emphysema	1
162	Diffusion Impaired (≤80% DLCO)	Severe Restriction (≤50% TLC)	Baseline Long COVID Clinic Visit	Ground Glass Opacities	1
162	Diffusion Impaired (≤80% DLCO)	Severe Restriction (≤50% TLC)	Baseline Long COVID Clinic Visit	Reticulations	1
162	Diffusion Impaired (≤80% DLCO)	Severe Restriction (≤50% TLC)	Baseline Long COVID Clinic Visit	Other Fibrosis	0
162	Diffusion Impaired (≤80% DLCO)	Severe Restriction (≤50% TLC)	Baseline Long COVID Clinic Visit	Bronchiectasis	1
162	Diffusion Impaired (≤80% DLCO)	Severe Restriction (≤50% TLC)	Baseline Long COVID Clinic Visit	Consolidation	0
162	Diffusion Impaired (≤80% DLCO)	Severe Restriction (≤50% TLC)	Baseline Long COVID Clinic Visit	Emphysema	0
163	Diffusion Impaired (≤80% DLCO)	Severe Restriction (≤50% TLC)	Baseline Long COVID Clinic Visit	Ground Glass Opacities	1
163	Diffusion Impaired (≤80% DLCO)	Severe Restriction (≤50% TLC)	Baseline Long COVID Clinic Visit	Reticulations	1
163	Diffusion Impaired (≤80% DLCO)	Severe Restriction (≤50% TLC)	Baseline Long COVID Clinic Visit	Other Fibrosis	1
163	Diffusion Impaired (≤80% DLCO)	Severe Restriction (≤50% TLC)	Baseline Long COVID Clinic Visit	Bronchiectasis	1
163	Diffusion Impaired (≤80% DLCO)	Severe Restriction (≤50% TLC)	Baseline Long COVID Clinic Visit	Consolidation	0
163	Diffusion Impaired (≤80% DLCO)	Severe Restriction (≤50% TLC)	Baseline Long COVID Clinic Visit	Emphysema	0
164	Diffusion Impaired (≤80% DLCO)	Mild Restriction (71-80% TLC)	Baseline Long COVID Clinic Visit	Ground Glass Opacities	0
164	Diffusion Impaired (≤80% DLCO)	Mild Restriction (71-80% TLC)	Baseline Long COVID Clinic Visit	Reticulations	0
164	Diffusion Impaired (≤80% DLCO)	Mild Restriction (71-80% TLC)	Baseline Long COVID Clinic Visit	Other Fibrosis	0
164	Diffusion Impaired (≤80% DLCO)	Mild Restriction (71-80% TLC)	Baseline Long COVID Clinic Visit	Bronchiectasis	0
164	Diffusion Impaired (≤80% DLCO)	Mild Restriction (71-80% TLC)	Baseline Long COVID Clinic Visit	Consolidation	0
164	Diffusion Impaired (≤80% DLCO)	Mild Restriction (71-80% TLC)	Baseline Long COVID Clinic Visit	Emphysema	0
165	Diffusion Impaired (≤80% DLCO)	Severe Restriction (≤50% TLC)	Baseline Long COVID Clinic Visit	Ground Glass Opacities	1
165	Diffusion Impaired (≤80% DLCO)	Severe Restriction (≤50% TLC)	Baseline Long COVID Clinic Visit	Reticulations	1
165	Diffusion Impaired (≤80% DLCO)	Severe Restriction (≤50% TLC)	Baseline Long COVID Clinic Visit	Other Fibrosis	0
165	Diffusion Impaired (≤80% DLCO)	Severe Restriction (≤50% TLC)	Baseline Long COVID Clinic Visit	Bronchiectasis	0
165	Diffusion Impaired (≤80% DLCO)	Severe Restriction (≤50% TLC)	Baseline Long COVID Clinic Visit	Consolidation	1
165	Diffusion Impaired (≤80% DLCO)	Severe Restriction (≤50% TLC)	Baseline Long COVID Clinic Visit	Emphysema	0
166	Diffusion Impaired (≤80% DLCO)	Mild Restriction (71-80% TLC)	Baseline Long COVID Clinic Visit	Ground Glass Opacities	0
166	Diffusion Impaired (≤80% DLCO)	Mild Restriction (71-80% TLC)	Baseline Long COVID Clinic Visit	Reticulations	0
166	Diffusion Impaired (≤80% DLCO)	Mild Restriction (71-80% TLC)	Baseline Long COVID Clinic Visit	Other Fibrosis	0
166	Diffusion Impaired (≤80% DLCO)	Mild Restriction (71-80% TLC)	Baseline Long COVID Clinic Visit	Bronchiectasis	0
166	Diffusion Impaired (≤80% DLCO)	Mild Restriction (71-80% TLC)	Baseline Long COVID Clinic Visit	Consolidation	0
166	Diffusion Impaired (≤80% DLCO)	Mild Restriction (71-80% TLC)	Baseline Long COVID Clinic Visit	Emphysema	0
167	Diffusion Impaired (≤80% DLCO)	Severe Restriction (≤50% TLC)	Baseline Long COVID Clinic Visit	Ground Glass Opacities	1
167	Diffusion Impaired (≤80% DLCO)	Severe Restriction (≤50% TLC)	Baseline Long COVID Clinic Visit	Reticulations	1
167	Diffusion Impaired (≤80% DLCO)	Severe Restriction (≤50% TLC)	Baseline Long COVID Clinic Visit	Other Fibrosis	1
167	Diffusion Impaired (≤80% DLCO)	Severe Restriction (≤50% TLC)	Baseline Long COVID Clinic Visit	Bronchiectasis	1
167	Diffusion Impaired (≤80% DLCO)	Severe Restriction (≤50% TLC)	Baseline Long COVID Clinic Visit	Consolidation	0
167	Diffusion Impaired (≤80% DLCO)	Severe Restriction (≤50% TLC)	Baseline Long COVID Clinic Visit	Emphysema	0
169	Diffusion Impaired (≤80% DLCO)	Moderate Restriction (51-70% TLC)	Baseline Long COVID Clinic Visit	Ground Glass Opacities	1
169	Diffusion Impaired (≤80% DLCO)	Moderate Restriction (51-70% TLC)	Baseline Long COVID Clinic Visit	Reticulations	1
169	Diffusion Impaired (≤80% DLCO)	Moderate Restriction (51-70% TLC)	Baseline Long COVID Clinic Visit	Other Fibrosis	0
169	Diffusion Impaired (≤80% DLCO)	Moderate Restriction (51-70% TLC)	Baseline Long COVID Clinic Visit	Bronchiectasis	0
169	Diffusion Impaired (≤80% DLCO)	Moderate Restriction (51-70% TLC)	Baseline Long COVID Clinic Visit	Consolidation	1
169	Diffusion Impaired (≤80% DLCO)	Moderate Restriction (51-70% TLC)	Baseline Long COVID Clinic Visit	Emphysema	0
170	Diffusion Impaired (≤80% DLCO)	Moderate Restriction (51-70% TLC)	Baseline Long COVID Clinic Visit	Ground Glass Opacities	1
170	Diffusion Impaired (≤80% DLCO)	Moderate Restriction (51-70% TLC)	Baseline Long COVID Clinic Visit	Reticulations	1
170	Diffusion Impaired (≤80% DLCO)	Moderate Restriction (51-70% TLC)	Baseline Long COVID Clinic Visit	Other Fibrosis	0
170	Diffusion Impaired (≤80% DLCO)	Moderate Restriction (51-70% TLC)	Baseline Long COVID Clinic Visit	Bronchiectasis	0
170	Diffusion Impaired (≤80% DLCO)	Moderate Restriction (51-70% TLC)	Baseline Long COVID Clinic Visit	Consolidation	0
170	Diffusion Impaired (≤80% DLCO)	Moderate Restriction (51-70% TLC)	Baseline Long COVID Clinic Visit	Emphysema	0
171	Diffusion Impaired (≤80% DLCO)	Moderate Restriction (51-70% TLC)	Baseline Long COVID Clinic Visit	Ground Glass Opacities	1
171	Diffusion Impaired (≤80% DLCO)	Moderate Restriction (51-70% TLC)	Baseline Long COVID Clinic Visit	Reticulations	1
171	Diffusion Impaired (≤80% DLCO)	Moderate Restriction (51-70% TLC)	Baseline Long COVID Clinic Visit	Other Fibrosis	0
171	Diffusion Impaired (≤80% DLCO)	Moderate Restriction (51-70% TLC)	Baseline Long COVID Clinic Visit	Bronchiectasis	0
171	Diffusion Impaired (≤80% DLCO)	Moderate Restriction (51-70% TLC)	Baseline Long COVID Clinic Visit	Consolidation	0
171	Diffusion Impaired (≤80% DLCO)	Moderate Restriction (51-70% TLC)	Baseline Long COVID Clinic Visit	Emphysema	0
172	Diffusion Impaired (≤80% DLCO)	Moderate Restriction (51-70% TLC)	Baseline Long COVID Clinic Visit	Ground Glass Opacities	1
172	Diffusion Impaired (≤80% DLCO)	Moderate Restriction (51-70% TLC)	Baseline Long COVID Clinic Visit	Reticulations	1
172	Diffusion Impaired (≤80% DLCO)	Moderate Restriction (51-70% TLC)	Baseline Long COVID Clinic Visit	Other Fibrosis	0
172	Diffusion Impaired (≤80% DLCO)	Moderate Restriction (51-70% TLC)	Baseline Long COVID Clinic Visit	Bronchiectasis	0
172	Diffusion Impaired (≤80% DLCO)	Moderate Restriction (51-70% TLC)	Baseline Long COVID Clinic Visit	Consolidation	0
172	Diffusion Impaired (≤80% DLCO)	Moderate Restriction (51-70% TLC)	Baseline Long COVID Clinic Visit	Emphysema	0
173	Diffusion Impaired (≤80% DLCO)	Moderate Restriction (51-70% TLC)	Baseline Long COVID Clinic Visit	Ground Glass Opacities	1
173	Diffusion Impaired (≤80% DLCO)	Moderate Restriction (51-70% TLC)	Baseline Long COVID Clinic Visit	Reticulations	1
173	Diffusion Impaired (≤80% DLCO)	Moderate Restriction (51-70% TLC)	Baseline Long COVID Clinic Visit	Other Fibrosis	0
173	Diffusion Impaired (≤80% DLCO)	Moderate Restriction (51-70% TLC)	Baseline Long COVID Clinic Visit	Bronchiectasis	0
173	Diffusion Impaired (≤80% DLCO)	Moderate Restriction (51-70% TLC)	Baseline Long COVID Clinic Visit	Consolidation	0
173	Diffusion Impaired (≤80% DLCO)	Moderate Restriction (51-70% TLC)	Baseline Long COVID Clinic Visit	Emphysema	0
175	Diffusion Impaired (≤80% DLCO)	Moderate Restriction (51-70% TLC)	Baseline Long COVID Clinic Visit	Ground Glass Opacities	1
175	Diffusion Impaired (≤80% DLCO)	Moderate Restriction (51-70% TLC)	Baseline Long COVID Clinic Visit	Reticulations	1
175	Diffusion Impaired (≤80% DLCO)	Moderate Restriction (51-70% TLC)	Baseline Long COVID Clinic Visit	Other Fibrosis	1
175	Diffusion Impaired (≤80% DLCO)	Moderate Restriction (51-70% TLC)	Baseline Long COVID Clinic Visit	Bronchiectasis	1
175	Diffusion Impaired (≤80% DLCO)	Moderate Restriction (51-70% TLC)	Baseline Long COVID Clinic Visit	Consolidation	0
175	Diffusion Impaired (≤80% DLCO)	Moderate Restriction (51-70% TLC)	Baseline Long COVID Clinic Visit	Emphysema	0
176	Diffusion Impaired (≤80% DLCO)	Moderate Restriction (51-70% TLC)	Baseline Long COVID Clinic Visit	Ground Glass Opacities	1
176	Diffusion Impaired (≤80% DLCO)	Moderate Restriction (51-70% TLC)	Baseline Long COVID Clinic Visit	Reticulations	1
176	Diffusion Impaired (≤80% DLCO)	Moderate Restriction (51-70% TLC)	Baseline Long COVID Clinic Visit	Other Fibrosis	1
176	Diffusion Impaired (≤80% DLCO)	Moderate Restriction (51-70% TLC)	Baseline Long COVID Clinic Visit	Bronchiectasis	1
176	Diffusion Impaired (≤80% DLCO)	Moderate Restriction (51-70% TLC)	Baseline Long COVID Clinic Visit	Consolidation	0
176	Diffusion Impaired (≤80% DLCO)	Moderate Restriction (51-70% TLC)	Baseline Long COVID Clinic Visit	Emphysema	0
177	Diffusion Impaired (≤80% DLCO)	Severe Restriction (≤50% TLC)	Baseline Long COVID Clinic Visit	Ground Glass Opacities	0
177	Diffusion Impaired (≤80% DLCO)	Severe Restriction (≤50% TLC)	Baseline Long COVID Clinic Visit	Reticulations	1
177	Diffusion Impaired (≤80% DLCO)	Severe Restriction (≤50% TLC)	Baseline Long COVID Clinic Visit	Other Fibrosis	1
177	Diffusion Impaired (≤80% DLCO)	Severe Restriction (≤50% TLC)	Baseline Long COVID Clinic Visit	Bronchiectasis	1
177	Diffusion Impaired (≤80% DLCO)	Severe Restriction (≤50% TLC)	Baseline Long COVID Clinic Visit	Consolidation	0
177	Diffusion Impaired (≤80% DLCO)	Severe Restriction (≤50% TLC)	Baseline Long COVID Clinic Visit	Emphysema	0
178	Diffusion Impaired (≤80% DLCO)	No Restriction (>80% TLC)	Baseline Long COVID Clinic Visit	Ground Glass Opacities	0
178	Diffusion Impaired (≤80% DLCO)	No Restriction (>80% TLC)	Baseline Long COVID Clinic Visit	Reticulations	0
178	Diffusion Impaired (≤80% DLCO)	No Restriction (>80% TLC)	Baseline Long COVID Clinic Visit	Other Fibrosis	0
178	Diffusion Impaired (≤80% DLCO)	No Restriction (>80% TLC)	Baseline Long COVID Clinic Visit	Bronchiectasis	0
178	Diffusion Impaired (≤80% DLCO)	No Restriction (>80% TLC)	Baseline Long COVID Clinic Visit	Consolidation	0
178	Diffusion Impaired (≤80% DLCO)	No Restriction (>80% TLC)	Baseline Long COVID Clinic Visit	Emphysema	0
179	Diffusion Impaired (≤80% DLCO)	Severe Restriction (≤50% TLC)	Baseline Long COVID Clinic Visit	Ground Glass Opacities	1
179	Diffusion Impaired (≤80% DLCO)	Severe Restriction (≤50% TLC)	Baseline Long COVID Clinic Visit	Reticulations	1
179	Diffusion Impaired (≤80% DLCO)	Severe Restriction (≤50% TLC)	Baseline Long COVID Clinic Visit	Other Fibrosis	1
179	Diffusion Impaired (≤80% DLCO)	Severe Restriction (≤50% TLC)	Baseline Long COVID Clinic Visit	Bronchiectasis	1
179	Diffusion Impaired (≤80% DLCO)	Severe Restriction (≤50% TLC)	Baseline Long COVID Clinic Visit	Consolidation	0
179	Diffusion Impaired (≤80% DLCO)	Severe Restriction (≤50% TLC)	Baseline Long COVID Clinic Visit	Emphysema	1
180	Diffusion Impaired (≤80% DLCO)	Mild Restriction (71-80% TLC)	Baseline Long COVID Clinic Visit	Ground Glass Opacities	1
180	Diffusion Impaired (≤80% DLCO)	Mild Restriction (71-80% TLC)	Baseline Long COVID Clinic Visit	Reticulations	1
180	Diffusion Impaired (≤80% DLCO)	Mild Restriction (71-80% TLC)	Baseline Long COVID Clinic Visit	Other Fibrosis	1
180	Diffusion Impaired (≤80% DLCO)	Mild Restriction (71-80% TLC)	Baseline Long COVID Clinic Visit	Bronchiectasis	1
180	Diffusion Impaired (≤80% DLCO)	Mild Restriction (71-80% TLC)	Baseline Long COVID Clinic Visit	Consolidation	0
180	Diffusion Impaired (≤80% DLCO)	Mild Restriction (71-80% TLC)	Baseline Long COVID Clinic Visit	Emphysema	0
181	Diffusion Impaired (≤80% DLCO)	Severe Restriction (≤50% TLC)	Baseline Long COVID Clinic Visit	Ground Glass Opacities	1
181	Diffusion Impaired (≤80% DLCO)	Severe Restriction (≤50% TLC)	Baseline Long COVID Clinic Visit	Reticulations	1
181	Diffusion Impaired (≤80% DLCO)	Severe Restriction (≤50% TLC)	Baseline Long COVID Clinic Visit	Other Fibrosis	0
181	Diffusion Impaired (≤80% DLCO)	Severe Restriction (≤50% TLC)	Baseline Long COVID Clinic Visit	Bronchiectasis	0
181	Diffusion Impaired (≤80% DLCO)	Severe Restriction (≤50% TLC)	Baseline Long COVID Clinic Visit	Consolidation	0
181	Diffusion Impaired (≤80% DLCO)	Severe Restriction (≤50% TLC)	Baseline Long COVID Clinic Visit	Emphysema	0
182	Diffusion Impaired (≤80% DLCO)	Moderate Restriction (51-70% TLC)	Baseline Long COVID Clinic Visit	Ground Glass Opacities	1
182	Diffusion Impaired (≤80% DLCO)	Moderate Restriction (51-70% TLC)	Baseline Long COVID Clinic Visit	Reticulations	1
182	Diffusion Impaired (≤80% DLCO)	Moderate Restriction (51-70% TLC)	Baseline Long COVID Clinic Visit	Other Fibrosis	1
182	Diffusion Impaired (≤80% DLCO)	Moderate Restriction (51-70% TLC)	Baseline Long COVID Clinic Visit	Bronchiectasis	1
182	Diffusion Impaired (≤80% DLCO)	Moderate Restriction (51-70% TLC)	Baseline Long COVID Clinic Visit	Consolidation	0
182	Diffusion Impaired (≤80% DLCO)	Moderate Restriction (51-70% TLC)	Baseline Long COVID Clinic Visit	Emphysema	0
183	Diffusion Impaired (≤80% DLCO)	Severe Restriction (≤50% TLC)	Baseline Long COVID Clinic Visit	Ground Glass Opacities	1
183	Diffusion Impaired (≤80% DLCO)	Severe Restriction (≤50% TLC)	Baseline Long COVID Clinic Visit	Reticulations	1
183	Diffusion Impaired (≤80% DLCO)	Severe Restriction (≤50% TLC)	Baseline Long COVID Clinic Visit	Other Fibrosis	1
183	Diffusion Impaired (≤80% DLCO)	Severe Restriction (≤50% TLC)	Baseline Long COVID Clinic Visit	Bronchiectasis	1
183	Diffusion Impaired (≤80% DLCO)	Severe Restriction (≤50% TLC)	Baseline Long COVID Clinic Visit	Consolidation	1
183	Diffusion Impaired (≤80% DLCO)	Severe Restriction (≤50% TLC)	Baseline Long COVID Clinic Visit	Emphysema	0
184	Diffusion Impaired (≤80% DLCO)	Moderate Restriction (51-70% TLC)	Baseline Long COVID Clinic Visit	Ground Glass Opacities	1
184	Diffusion Impaired (≤80% DLCO)	Moderate Restriction (51-70% TLC)	Baseline Long COVID Clinic Visit	Reticulations	1
184	Diffusion Impaired (≤80% DLCO)	Moderate Restriction (51-70% TLC)	Baseline Long COVID Clinic Visit	Other Fibrosis	1
184	Diffusion Impaired (≤80% DLCO)	Moderate Restriction (51-70% TLC)	Baseline Long COVID Clinic Visit	Bronchiectasis	1
184	Diffusion Impaired (≤80% DLCO)	Moderate Restriction (51-70% TLC)	Baseline Long COVID Clinic Visit	Consolidation	0
184	Diffusion Impaired (≤80% DLCO)	Moderate Restriction (51-70% TLC)	Baseline Long COVID Clinic Visit	Emphysema	0
185	Diffusion Impaired (≤80% DLCO)	Mild Restriction (71-80% TLC)	Baseline Long COVID Clinic Visit	Ground Glass Opacities	1
185	Diffusion Impaired (≤80% DLCO)	Mild Restriction (71-80% TLC)	Baseline Long COVID Clinic Visit	Reticulations	0
185	Diffusion Impaired (≤80% DLCO)	Mild Restriction (71-80% TLC)	Baseline Long COVID Clinic Visit	Other Fibrosis	0
185	Diffusion Impaired (≤80% DLCO)	Mild Restriction (71-80% TLC)	Baseline Long COVID Clinic Visit	Bronchiectasis	0
185	Diffusion Impaired (≤80% DLCO)	Mild Restriction (71-80% TLC)	Baseline Long COVID Clinic Visit	Consolidation	0
185	Diffusion Impaired (≤80% DLCO)	Mild Restriction (71-80% TLC)	Baseline Long COVID Clinic Visit	Emphysema	0
21	Diffusion Impaired (≤80% DLCO)	Severe Restriction (≤50% TLC)	Baseline Long COVID Clinic Visit	Ground Glass Opacities	1
21	Diffusion Impaired (≤80% DLCO)	Severe Restriction (≤50% TLC)	Baseline Long COVID Clinic Visit	Reticulations	1
21	Diffusion Impaired (≤80% DLCO)	Severe Restriction (≤50% TLC)	Baseline Long COVID Clinic Visit	Other Fibrosis	1
21	Diffusion Impaired (≤80% DLCO)	Severe Restriction (≤50% TLC)	Baseline Long COVID Clinic Visit	Bronchiectasis	0
21	Diffusion Impaired (≤80% DLCO)	Severe Restriction (≤50% TLC)	Baseline Long COVID Clinic Visit	Consolidation	1
21	Diffusion Impaired (≤80% DLCO)	Severe Restriction (≤50% TLC)	Baseline Long COVID Clinic Visit	Emphysema	0
186	Diffusion Impaired (≤80% DLCO)	Severe Restriction (≤50% TLC)	Baseline Long COVID Clinic Visit	Ground Glass Opacities	1
186	Diffusion Impaired (≤80% DLCO)	Severe Restriction (≤50% TLC)	Baseline Long COVID Clinic Visit	Reticulations	1
186	Diffusion Impaired (≤80% DLCO)	Severe Restriction (≤50% TLC)	Baseline Long COVID Clinic Visit	Other Fibrosis	1
186	Diffusion Impaired (≤80% DLCO)	Severe Restriction (≤50% TLC)	Baseline Long COVID Clinic Visit	Bronchiectasis	1
186	Diffusion Impaired (≤80% DLCO)	Severe Restriction (≤50% TLC)	Baseline Long COVID Clinic Visit	Consolidation	0
186	Diffusion Impaired (≤80% DLCO)	Severe Restriction (≤50% TLC)	Baseline Long COVID Clinic Visit	Emphysema	0
187	Diffusion Impaired (≤80% DLCO)	Moderate Restriction (51-70% TLC)	Baseline Long COVID Clinic Visit	Ground Glass Opacities	1
187	Diffusion Impaired (≤80% DLCO)	Moderate Restriction (51-70% TLC)	Baseline Long COVID Clinic Visit	Reticulations	0
187	Diffusion Impaired (≤80% DLCO)	Moderate Restriction (51-70% TLC)	Baseline Long COVID Clinic Visit	Other Fibrosis	0
187	Diffusion Impaired (≤80% DLCO)	Moderate Restriction (51-70% TLC)	Baseline Long COVID Clinic Visit	Bronchiectasis	0
187	Diffusion Impaired (≤80% DLCO)	Moderate Restriction (51-70% TLC)	Baseline Long COVID Clinic Visit	Consolidation	0
187	Diffusion Impaired (≤80% DLCO)	Moderate Restriction (51-70% TLC)	Baseline Long COVID Clinic Visit	Emphysema	0
190	Diffusion Impaired (≤80% DLCO)	Moderate Restriction (51-70% TLC)	Baseline Long COVID Clinic Visit	Ground Glass Opacities	0
190	Diffusion Impaired (≤80% DLCO)	Moderate Restriction (51-70% TLC)	Baseline Long COVID Clinic Visit	Reticulations	0
190	Diffusion Impaired (≤80% DLCO)	Moderate Restriction (51-70% TLC)	Baseline Long COVID Clinic Visit	Other Fibrosis	0
190	Diffusion Impaired (≤80% DLCO)	Moderate Restriction (51-70% TLC)	Baseline Long COVID Clinic Visit	Bronchiectasis	0
190	Diffusion Impaired (≤80% DLCO)	Moderate Restriction (51-70% TLC)	Baseline Long COVID Clinic Visit	Consolidation	0
190	Diffusion Impaired (≤80% DLCO)	Moderate Restriction (51-70% TLC)	Baseline Long COVID Clinic Visit	Emphysema	0
191	Diffusion Impaired (≤80% DLCO)	No Restriction (>80% TLC)	Baseline Long COVID Clinic Visit	Ground Glass Opacities	0
191	Diffusion Impaired (≤80% DLCO)	No Restriction (>80% TLC)	Baseline Long COVID Clinic Visit	Reticulations	0
191	Diffusion Impaired (≤80% DLCO)	No Restriction (>80% TLC)	Baseline Long COVID Clinic Visit	Other Fibrosis	0
191	Diffusion Impaired (≤80% DLCO)	No Restriction (>80% TLC)	Baseline Long COVID Clinic Visit	Bronchiectasis	0
191	Diffusion Impaired (≤80% DLCO)	No Restriction (>80% TLC)	Baseline Long COVID Clinic Visit	Consolidation	1
191	Diffusion Impaired (≤80% DLCO)	No Restriction (>80% TLC)	Baseline Long COVID Clinic Visit	Emphysema	1
192	Diffusion Impaired (≤80% DLCO)	Severe Restriction (≤50% TLC)	Baseline Long COVID Clinic Visit	Ground Glass Opacities	1
192	Diffusion Impaired (≤80% DLCO)	Severe Restriction (≤50% TLC)	Baseline Long COVID Clinic Visit	Reticulations	1
192	Diffusion Impaired (≤80% DLCO)	Severe Restriction (≤50% TLC)	Baseline Long COVID Clinic Visit	Other Fibrosis	1
192	Diffusion Impaired (≤80% DLCO)	Severe Restriction (≤50% TLC)	Baseline Long COVID Clinic Visit	Bronchiectasis	1
192	Diffusion Impaired (≤80% DLCO)	Severe Restriction (≤50% TLC)	Baseline Long COVID Clinic Visit	Consolidation	1
192	Diffusion Impaired (≤80% DLCO)	Severe Restriction (≤50% TLC)	Baseline Long COVID Clinic Visit	Emphysema	0
193	Diffusion Impaired (≤80% DLCO)	Severe Restriction (≤50% TLC)	Baseline Long COVID Clinic Visit	Ground Glass Opacities	1
193	Diffusion Impaired (≤80% DLCO)	Severe Restriction (≤50% TLC)	Baseline Long COVID Clinic Visit	Reticulations	1
193	Diffusion Impaired (≤80% DLCO)	Severe Restriction (≤50% TLC)	Baseline Long COVID Clinic Visit	Other Fibrosis	1
193	Diffusion Impaired (≤80% DLCO)	Severe Restriction (≤50% TLC)	Baseline Long COVID Clinic Visit	Bronchiectasis	1
193	Diffusion Impaired (≤80% DLCO)	Severe Restriction (≤50% TLC)	Baseline Long COVID Clinic Visit	Consolidation	0
193	Diffusion Impaired (≤80% DLCO)	Severe Restriction (≤50% TLC)	Baseline Long COVID Clinic Visit	Emphysema	0
194	Diffusion Impaired (≤80% DLCO)	Severe Restriction (≤50% TLC)	Baseline Long COVID Clinic Visit	Ground Glass Opacities	1
194	Diffusion Impaired (≤80% DLCO)	Severe Restriction (≤50% TLC)	Baseline Long COVID Clinic Visit	Reticulations	1
194	Diffusion Impaired (≤80% DLCO)	Severe Restriction (≤50% TLC)	Baseline Long COVID Clinic Visit	Other Fibrosis	1
194	Diffusion Impaired (≤80% DLCO)	Severe Restriction (≤50% TLC)	Baseline Long COVID Clinic Visit	Bronchiectasis	1
194	Diffusion Impaired (≤80% DLCO)	Severe Restriction (≤50% TLC)	Baseline Long COVID Clinic Visit	Consolidation	0
194	Diffusion Impaired (≤80% DLCO)	Severe Restriction (≤50% TLC)	Baseline Long COVID Clinic Visit	Emphysema	1
195	Diffusion Impaired (≤80% DLCO)	Moderate Restriction (51-70% TLC)	Baseline Long COVID Clinic Visit	Ground Glass Opacities	0
195	Diffusion Impaired (≤80% DLCO)	Moderate Restriction (51-70% TLC)	Baseline Long COVID Clinic Visit	Reticulations	0
195	Diffusion Impaired (≤80% DLCO)	Moderate Restriction (51-70% TLC)	Baseline Long COVID Clinic Visit	Other Fibrosis	0
195	Diffusion Impaired (≤80% DLCO)	Moderate Restriction (51-70% TLC)	Baseline Long COVID Clinic Visit	Bronchiectasis	1
195	Diffusion Impaired (≤80% DLCO)	Moderate Restriction (51-70% TLC)	Baseline Long COVID Clinic Visit	Consolidation	0
195	Diffusion Impaired (≤80% DLCO)	Moderate Restriction (51-70% TLC)	Baseline Long COVID Clinic Visit	Emphysema	0
197	Diffusion Impaired (≤80% DLCO)	Moderate Restriction (51-70% TLC)	Baseline Long COVID Clinic Visit	Ground Glass Opacities	0
197	Diffusion Impaired (≤80% DLCO)	Moderate Restriction (51-70% TLC)	Baseline Long COVID Clinic Visit	Reticulations	0
197	Diffusion Impaired (≤80% DLCO)	Moderate Restriction (51-70% TLC)	Baseline Long COVID Clinic Visit	Other Fibrosis	0
197	Diffusion Impaired (≤80% DLCO)	Moderate Restriction (51-70% TLC)	Baseline Long COVID Clinic Visit	Bronchiectasis	0
197	Diffusion Impaired (≤80% DLCO)	Moderate Restriction (51-70% TLC)	Baseline Long COVID Clinic Visit	Consolidation	0
197	Diffusion Impaired (≤80% DLCO)	Moderate Restriction (51-70% TLC)	Baseline Long COVID Clinic Visit	Emphysema	0
198	Diffusion Impaired (≤80% DLCO)	Moderate Restriction (51-70% TLC)	Baseline Long COVID Clinic Visit	Ground Glass Opacities	0
198	Diffusion Impaired (≤80% DLCO)	Moderate Restriction (51-70% TLC)	Baseline Long COVID Clinic Visit	Reticulations	0
198	Diffusion Impaired (≤80% DLCO)	Moderate Restriction (51-70% TLC)	Baseline Long COVID Clinic Visit	Other Fibrosis	0
198	Diffusion Impaired (≤80% DLCO)	Moderate Restriction (51-70% TLC)	Baseline Long COVID Clinic Visit	Bronchiectasis	0
198	Diffusion Impaired (≤80% DLCO)	Moderate Restriction (51-70% TLC)	Baseline Long COVID Clinic Visit	Consolidation	0
198	Diffusion Impaired (≤80% DLCO)	Moderate Restriction (51-70% TLC)	Baseline Long COVID Clinic Visit	Emphysema	0
199	Diffusion Impaired (≤80% DLCO)	Moderate Restriction (51-70% TLC)	Baseline Long COVID Clinic Visit	Ground Glass Opacities	1
199	Diffusion Impaired (≤80% DLCO)	Moderate Restriction (51-70% TLC)	Baseline Long COVID Clinic Visit	Reticulations	0
199	Diffusion Impaired (≤80% DLCO)	Moderate Restriction (51-70% TLC)	Baseline Long COVID Clinic Visit	Other Fibrosis	0
199	Diffusion Impaired (≤80% DLCO)	Moderate Restriction (51-70% TLC)	Baseline Long COVID Clinic Visit	Bronchiectasis	0
199	Diffusion Impaired (≤80% DLCO)	Moderate Restriction (51-70% TLC)	Baseline Long COVID Clinic Visit	Consolidation	0
199	Diffusion Impaired (≤80% DLCO)	Moderate Restriction (51-70% TLC)	Baseline Long COVID Clinic Visit	Emphysema	0
200	Diffusion Impaired (≤80% DLCO)	Moderate Restriction (51-70% TLC)	Baseline Long COVID Clinic Visit	Ground Glass Opacities	0
200	Diffusion Impaired (≤80% DLCO)	Moderate Restriction (51-70% TLC)	Baseline Long COVID Clinic Visit	Reticulations	0
200	Diffusion Impaired (≤80% DLCO)	Moderate Restriction (51-70% TLC)	Baseline Long COVID Clinic Visit	Other Fibrosis	0
200	Diffusion Impaired (≤80% DLCO)	Moderate Restriction (51-70% TLC)	Baseline Long COVID Clinic Visit	Bronchiectasis	0
200	Diffusion Impaired (≤80% DLCO)	Moderate Restriction (51-70% TLC)	Baseline Long COVID Clinic Visit	Consolidation	0
200	Diffusion Impaired (≤80% DLCO)	Moderate Restriction (51-70% TLC)	Baseline Long COVID Clinic Visit	Emphysema	0
201	Diffusion Impaired (≤80% DLCO)	Severe Restriction (≤50% TLC)	Baseline Long COVID Clinic Visit	Ground Glass Opacities	1
201	Diffusion Impaired (≤80% DLCO)	Severe Restriction (≤50% TLC)	Baseline Long COVID Clinic Visit	Reticulations	1
201	Diffusion Impaired (≤80% DLCO)	Severe Restriction (≤50% TLC)	Baseline Long COVID Clinic Visit	Other Fibrosis	1
201	Diffusion Impaired (≤80% DLCO)	Severe Restriction (≤50% TLC)	Baseline Long COVID Clinic Visit	Bronchiectasis	1
201	Diffusion Impaired (≤80% DLCO)	Severe Restriction (≤50% TLC)	Baseline Long COVID Clinic Visit	Consolidation	0
201	Diffusion Impaired (≤80% DLCO)	Severe Restriction (≤50% TLC)	Baseline Long COVID Clinic Visit	Emphysema	0
202	Diffusion Impaired (≤80% DLCO)	Moderate Restriction (51-70% TLC)	Baseline Long COVID Clinic Visit	Ground Glass Opacities	1
202	Diffusion Impaired (≤80% DLCO)	Moderate Restriction (51-70% TLC)	Baseline Long COVID Clinic Visit	Reticulations	1
202	Diffusion Impaired (≤80% DLCO)	Moderate Restriction (51-70% TLC)	Baseline Long COVID Clinic Visit	Other Fibrosis	1
202	Diffusion Impaired (≤80% DLCO)	Moderate Restriction (51-70% TLC)	Baseline Long COVID Clinic Visit	Bronchiectasis	1
202	Diffusion Impaired (≤80% DLCO)	Moderate Restriction (51-70% TLC)	Baseline Long COVID Clinic Visit	Consolidation	0
202	Diffusion Impaired (≤80% DLCO)	Moderate Restriction (51-70% TLC)	Baseline Long COVID Clinic Visit	Emphysema	0
203	Diffusion Impaired (≤80% DLCO)	Severe Restriction (≤50% TLC)	Baseline Long COVID Clinic Visit	Ground Glass Opacities	1
203	Diffusion Impaired (≤80% DLCO)	Severe Restriction (≤50% TLC)	Baseline Long COVID Clinic Visit	Reticulations	1
203	Diffusion Impaired (≤80% DLCO)	Severe Restriction (≤50% TLC)	Baseline Long COVID Clinic Visit	Other Fibrosis	1
203	Diffusion Impaired (≤80% DLCO)	Severe Restriction (≤50% TLC)	Baseline Long COVID Clinic Visit	Bronchiectasis	1
203	Diffusion Impaired (≤80% DLCO)	Severe Restriction (≤50% TLC)	Baseline Long COVID Clinic Visit	Consolidation	0
203	Diffusion Impaired (≤80% DLCO)	Severe Restriction (≤50% TLC)	Baseline Long COVID Clinic Visit	Emphysema	0
204	Diffusion Impaired (≤80% DLCO)	Severe Restriction (≤50% TLC)	Baseline Long COVID Clinic Visit	Ground Glass Opacities	0
204	Diffusion Impaired (≤80% DLCO)	Severe Restriction (≤50% TLC)	Baseline Long COVID Clinic Visit	Reticulations	0
204	Diffusion Impaired (≤80% DLCO)	Severe Restriction (≤50% TLC)	Baseline Long COVID Clinic Visit	Other Fibrosis	0
204	Diffusion Impaired (≤80% DLCO)	Severe Restriction (≤50% TLC)	Baseline Long COVID Clinic Visit	Bronchiectasis	0
204	Diffusion Impaired (≤80% DLCO)	Severe Restriction (≤50% TLC)	Baseline Long COVID Clinic Visit	Consolidation	0
204	Diffusion Impaired (≤80% DLCO)	Severe Restriction (≤50% TLC)	Baseline Long COVID Clinic Visit	Emphysema	0
205	Diffusion Impaired (≤80% DLCO)	Severe Restriction (≤50% TLC)	Baseline Long COVID Clinic Visit	Ground Glass Opacities	1
205	Diffusion Impaired (≤80% DLCO)	Severe Restriction (≤50% TLC)	Baseline Long COVID Clinic Visit	Reticulations	1
205	Diffusion Impaired (≤80% DLCO)	Severe Restriction (≤50% TLC)	Baseline Long COVID Clinic Visit	Other Fibrosis	1
205	Diffusion Impaired (≤80% DLCO)	Severe Restriction (≤50% TLC)	Baseline Long COVID Clinic Visit	Bronchiectasis	1
205	Diffusion Impaired (≤80% DLCO)	Severe Restriction (≤50% TLC)	Baseline Long COVID Clinic Visit	Consolidation	0
205	Diffusion Impaired (≤80% DLCO)	Severe Restriction (≤50% TLC)	Baseline Long COVID Clinic Visit	Emphysema	0
229	Diffusion Impaired (≤80% DLCO)	No Restriction (>80% TLC)	Baseline Long COVID Clinic Visit	Ground Glass Opacities	1
229	Diffusion Impaired (≤80% DLCO)	No Restriction (>80% TLC)	Baseline Long COVID Clinic Visit	Reticulations	1
229	Diffusion Impaired (≤80% DLCO)	No Restriction (>80% TLC)	Baseline Long COVID Clinic Visit	Other Fibrosis	0
229	Diffusion Impaired (≤80% DLCO)	No Restriction (>80% TLC)	Baseline Long COVID Clinic Visit	Bronchiectasis	0
229	Diffusion Impaired (≤80% DLCO)	No Restriction (>80% TLC)	Baseline Long COVID Clinic Visit	Consolidation	0
229	Diffusion Impaired (≤80% DLCO)	No Restriction (>80% TLC)	Baseline Long COVID Clinic Visit	Emphysema	0
220	Diffusion Impaired (≤80% DLCO)	Moderate Restriction (51-70% TLC)	Baseline Long COVID Clinic Visit	Ground Glass Opacities	1
220	Diffusion Impaired (≤80% DLCO)	Moderate Restriction (51-70% TLC)	Baseline Long COVID Clinic Visit	Reticulations	1
220	Diffusion Impaired (≤80% DLCO)	Moderate Restriction (51-70% TLC)	Baseline Long COVID Clinic Visit	Other Fibrosis	0
220	Diffusion Impaired (≤80% DLCO)	Moderate Restriction (51-70% TLC)	Baseline Long COVID Clinic Visit	Bronchiectasis	1
220	Diffusion Impaired (≤80% DLCO)	Moderate Restriction (51-70% TLC)	Baseline Long COVID Clinic Visit	Consolidation	0
220	Diffusion Impaired (≤80% DLCO)	Moderate Restriction (51-70% TLC)	Baseline Long COVID Clinic Visit	Emphysema	0
26	Diffusion Impaired (≤80% DLCO)	Mild Restriction (71-80% TLC)	Baseline Long COVID Clinic Visit	Ground Glass Opacities	0
26	Diffusion Impaired (≤80% DLCO)	Mild Restriction (71-80% TLC)	Baseline Long COVID Clinic Visit	Reticulations	0
26	Diffusion Impaired (≤80% DLCO)	Mild Restriction (71-80% TLC)	Baseline Long COVID Clinic Visit	Other Fibrosis	0
26	Diffusion Impaired (≤80% DLCO)	Mild Restriction (71-80% TLC)	Baseline Long COVID Clinic Visit	Bronchiectasis	0
26	Diffusion Impaired (≤80% DLCO)	Mild Restriction (71-80% TLC)	Baseline Long COVID Clinic Visit	Consolidation	0
26	Diffusion Impaired (≤80% DLCO)	Mild Restriction (71-80% TLC)	Baseline Long COVID Clinic Visit	Emphysema	0
42	Diffusion Impaired (≤80% DLCO)	Severe Restriction (≤50% TLC)	Baseline Long COVID Clinic Visit	Ground Glass Opacities	0
42	Diffusion Impaired (≤80% DLCO)	Severe Restriction (≤50% TLC)	Baseline Long COVID Clinic Visit	Reticulations	0
42	Diffusion Impaired (≤80% DLCO)	Severe Restriction (≤50% TLC)	Baseline Long COVID Clinic Visit	Other Fibrosis	0
42	Diffusion Impaired (≤80% DLCO)	Severe Restriction (≤50% TLC)	Baseline Long COVID Clinic Visit	Bronchiectasis	0
42	Diffusion Impaired (≤80% DLCO)	Severe Restriction (≤50% TLC)	Baseline Long COVID Clinic Visit	Consolidation	0
42	Diffusion Impaired (≤80% DLCO)	Severe Restriction (≤50% TLC)	Baseline Long COVID Clinic Visit	Emphysema	0
43	Diffusion Impaired (≤80% DLCO)	Moderate Restriction (51-70% TLC)	Baseline Long COVID Clinic Visit	Ground Glass Opacities	1
43	Diffusion Impaired (≤80% DLCO)	Moderate Restriction (51-70% TLC)	Baseline Long COVID Clinic Visit	Reticulations	0
43	Diffusion Impaired (≤80% DLCO)	Moderate Restriction (51-70% TLC)	Baseline Long COVID Clinic Visit	Other Fibrosis	0
43	Diffusion Impaired (≤80% DLCO)	Moderate Restriction (51-70% TLC)	Baseline Long COVID Clinic Visit	Bronchiectasis	0
43	Diffusion Impaired (≤80% DLCO)	Moderate Restriction (51-70% TLC)	Baseline Long COVID Clinic Visit	Consolidation	0
43	Diffusion Impaired (≤80% DLCO)	Moderate Restriction (51-70% TLC)	Baseline Long COVID Clinic Visit	Emphysema	0
52	Diffusion Impaired (≤80% DLCO)	Severe Restriction (≤50% TLC)	Baseline Long COVID Clinic Visit	Ground Glass Opacities	1
52	Diffusion Impaired (≤80% DLCO)	Severe Restriction (≤50% TLC)	Baseline Long COVID Clinic Visit	Reticulations	1
52	Diffusion Impaired (≤80% DLCO)	Severe Restriction (≤50% TLC)	Baseline Long COVID Clinic Visit	Other Fibrosis	1
52	Diffusion Impaired (≤80% DLCO)	Severe Restriction (≤50% TLC)	Baseline Long COVID Clinic Visit	Bronchiectasis	1
52	Diffusion Impaired (≤80% DLCO)	Severe Restriction (≤50% TLC)	Baseline Long COVID Clinic Visit	Consolidation	0
52	Diffusion Impaired (≤80% DLCO)	Severe Restriction (≤50% TLC)	Baseline Long COVID Clinic Visit	Emphysema	0
53	Diffusion Impaired (≤80% DLCO)	Severe Restriction (≤50% TLC)	Baseline Long COVID Clinic Visit	Ground Glass Opacities	1
53	Diffusion Impaired (≤80% DLCO)	Severe Restriction (≤50% TLC)	Baseline Long COVID Clinic Visit	Reticulations	1
53	Diffusion Impaired (≤80% DLCO)	Severe Restriction (≤50% TLC)	Baseline Long COVID Clinic Visit	Other Fibrosis	1
53	Diffusion Impaired (≤80% DLCO)	Severe Restriction (≤50% TLC)	Baseline Long COVID Clinic Visit	Bronchiectasis	1
53	Diffusion Impaired (≤80% DLCO)	Severe Restriction (≤50% TLC)	Baseline Long COVID Clinic Visit	Consolidation	0
53	Diffusion Impaired (≤80% DLCO)	Severe Restriction (≤50% TLC)	Baseline Long COVID Clinic Visit	Emphysema	0
34	Diffusion Impaired (≤80% DLCO)	Mild Restriction (71-80% TLC)	Baseline Long COVID Clinic Visit	Ground Glass Opacities	1
34	Diffusion Impaired (≤80% DLCO)	Mild Restriction (71-80% TLC)	Baseline Long COVID Clinic Visit	Reticulations	0
34	Diffusion Impaired (≤80% DLCO)	Mild Restriction (71-80% TLC)	Baseline Long COVID Clinic Visit	Other Fibrosis	0
34	Diffusion Impaired (≤80% DLCO)	Mild Restriction (71-80% TLC)	Baseline Long COVID Clinic Visit	Bronchiectasis	0
34	Diffusion Impaired (≤80% DLCO)	Mild Restriction (71-80% TLC)	Baseline Long COVID Clinic Visit	Consolidation	0
34	Diffusion Impaired (≤80% DLCO)	Mild Restriction (71-80% TLC)	Baseline Long COVID Clinic Visit	Emphysema	0
36	Diffusion Impaired (≤80% DLCO)	Moderate Restriction (51-70% TLC)	Baseline Long COVID Clinic Visit	Ground Glass Opacities	1
36	Diffusion Impaired (≤80% DLCO)	Moderate Restriction (51-70% TLC)	Baseline Long COVID Clinic Visit	Reticulations	1
36	Diffusion Impaired (≤80% DLCO)	Moderate Restriction (51-70% TLC)	Baseline Long COVID Clinic Visit	Other Fibrosis	1
36	Diffusion Impaired (≤80% DLCO)	Moderate Restriction (51-70% TLC)	Baseline Long COVID Clinic Visit	Bronchiectasis	1
36	Diffusion Impaired (≤80% DLCO)	Moderate Restriction (51-70% TLC)	Baseline Long COVID Clinic Visit	Consolidation	0
36	Diffusion Impaired (≤80% DLCO)	Moderate Restriction (51-70% TLC)	Baseline Long COVID Clinic Visit	Emphysema	1
211	Diffusion Impaired (≤80% DLCO)	Severe Restriction (≤50% TLC)	Baseline Long COVID Clinic Visit	Ground Glass Opacities	1
211	Diffusion Impaired (≤80% DLCO)	Severe Restriction (≤50% TLC)	Baseline Long COVID Clinic Visit	Reticulations	1
211	Diffusion Impaired (≤80% DLCO)	Severe Restriction (≤50% TLC)	Baseline Long COVID Clinic Visit	Other Fibrosis	1
211	Diffusion Impaired (≤80% DLCO)	Severe Restriction (≤50% TLC)	Baseline Long COVID Clinic Visit	Bronchiectasis	1
211	Diffusion Impaired (≤80% DLCO)	Severe Restriction (≤50% TLC)	Baseline Long COVID Clinic Visit	Consolidation	1
211	Diffusion Impaired (≤80% DLCO)	Severe Restriction (≤50% TLC)	Baseline Long COVID Clinic Visit	Emphysema	0
227	Diffusion Impaired (≤80% DLCO)	Moderate Restriction (51-70% TLC)	Baseline Long COVID Clinic Visit	Ground Glass Opacities	0
227	Diffusion Impaired (≤80% DLCO)	Moderate Restriction (51-70% TLC)	Baseline Long COVID Clinic Visit	Reticulations	1
227	Diffusion Impaired (≤80% DLCO)	Moderate Restriction (51-70% TLC)	Baseline Long COVID Clinic Visit	Other Fibrosis	0
227	Diffusion Impaired (≤80% DLCO)	Moderate Restriction (51-70% TLC)	Baseline Long COVID Clinic Visit	Bronchiectasis	0
227	Diffusion Impaired (≤80% DLCO)	Moderate Restriction (51-70% TLC)	Baseline Long COVID Clinic Visit	Consolidation	0
227	Diffusion Impaired (≤80% DLCO)	Moderate Restriction (51-70% TLC)	Baseline Long COVID Clinic Visit	Emphysema	0
237	Diffusion Impaired (≤80% DLCO)	Severe Restriction (≤50% TLC)	Baseline Long COVID Clinic Visit	Ground Glass Opacities	1
237	Diffusion Impaired (≤80% DLCO)	Severe Restriction (≤50% TLC)	Baseline Long COVID Clinic Visit	Reticulations	0
237	Diffusion Impaired (≤80% DLCO)	Severe Restriction (≤50% TLC)	Baseline Long COVID Clinic Visit	Other Fibrosis	0
237	Diffusion Impaired (≤80% DLCO)	Severe Restriction (≤50% TLC)	Baseline Long COVID Clinic Visit	Bronchiectasis	0
237	Diffusion Impaired (≤80% DLCO)	Severe Restriction (≤50% TLC)	Baseline Long COVID Clinic Visit	Consolidation	0
237	Diffusion Impaired (≤80% DLCO)	Severe Restriction (≤50% TLC)	Baseline Long COVID Clinic Visit	Emphysema	0
221	Diffusion Impaired (≤80% DLCO)	Severe Restriction (≤50% TLC)	Baseline Long COVID Clinic Visit	Ground Glass Opacities	1
221	Diffusion Impaired (≤80% DLCO)	Severe Restriction (≤50% TLC)	Baseline Long COVID Clinic Visit	Reticulations	1
221	Diffusion Impaired (≤80% DLCO)	Severe Restriction (≤50% TLC)	Baseline Long COVID Clinic Visit	Other Fibrosis	0
221	Diffusion Impaired (≤80% DLCO)	Severe Restriction (≤50% TLC)	Baseline Long COVID Clinic Visit	Bronchiectasis	0
221	Diffusion Impaired (≤80% DLCO)	Severe Restriction (≤50% TLC)	Baseline Long COVID Clinic Visit	Consolidation	0
221	Diffusion Impaired (≤80% DLCO)	Severe Restriction (≤50% TLC)	Baseline Long COVID Clinic Visit	Emphysema	0
73	Diffusion Impaired (≤80% DLCO)	Severe Restriction (≤50% TLC)	Baseline Long COVID Clinic Visit	Ground Glass Opacities	1
73	Diffusion Impaired (≤80% DLCO)	Severe Restriction (≤50% TLC)	Baseline Long COVID Clinic Visit	Reticulations	1
73	Diffusion Impaired (≤80% DLCO)	Severe Restriction (≤50% TLC)	Baseline Long COVID Clinic Visit	Other Fibrosis	1
73	Diffusion Impaired (≤80% DLCO)	Severe Restriction (≤50% TLC)	Baseline Long COVID Clinic Visit	Bronchiectasis	1
73	Diffusion Impaired (≤80% DLCO)	Severe Restriction (≤50% TLC)	Baseline Long COVID Clinic Visit	Consolidation	0
73	Diffusion Impaired (≤80% DLCO)	Severe Restriction (≤50% TLC)	Baseline Long COVID Clinic Visit	Emphysema	0
84	Diffusion Impaired (≤80% DLCO)	Moderate Restriction (51-70% TLC)	Baseline Long COVID Clinic Visit	Ground Glass Opacities	0
84	Diffusion Impaired (≤80% DLCO)	Moderate Restriction (51-70% TLC)	Baseline Long COVID Clinic Visit	Reticulations	1
84	Diffusion Impaired (≤80% DLCO)	Moderate Restriction (51-70% TLC)	Baseline Long COVID Clinic Visit	Other Fibrosis	0
84	Diffusion Impaired (≤80% DLCO)	Moderate Restriction (51-70% TLC)	Baseline Long COVID Clinic Visit	Bronchiectasis	0
84	Diffusion Impaired (≤80% DLCO)	Moderate Restriction (51-70% TLC)	Baseline Long COVID Clinic Visit	Consolidation	0
84	Diffusion Impaired (≤80% DLCO)	Moderate Restriction (51-70% TLC)	Baseline Long COVID Clinic Visit	Emphysema	0
92	Diffusion Impaired (≤80% DLCO)	Severe Restriction (≤50% TLC)	Baseline Long COVID Clinic Visit	Ground Glass Opacities	1
92	Diffusion Impaired (≤80% DLCO)	Severe Restriction (≤50% TLC)	Baseline Long COVID Clinic Visit	Reticulations	1
92	Diffusion Impaired (≤80% DLCO)	Severe Restriction (≤50% TLC)	Baseline Long COVID Clinic Visit	Other Fibrosis	0
92	Diffusion Impaired (≤80% DLCO)	Severe Restriction (≤50% TLC)	Baseline Long COVID Clinic Visit	Bronchiectasis	1
92	Diffusion Impaired (≤80% DLCO)	Severe Restriction (≤50% TLC)	Baseline Long COVID Clinic Visit	Consolidation	0
92	Diffusion Impaired (≤80% DLCO)	Severe Restriction (≤50% TLC)	Baseline Long COVID Clinic Visit	Emphysema	0
95	Diffusion Impaired (≤80% DLCO)	Moderate Restriction (51-70% TLC)	Baseline Long COVID Clinic Visit	Ground Glass Opacities	1
95	Diffusion Impaired (≤80% DLCO)	Moderate Restriction (51-70% TLC)	Baseline Long COVID Clinic Visit	Reticulations	1
95	Diffusion Impaired (≤80% DLCO)	Moderate Restriction (51-70% TLC)	Baseline Long COVID Clinic Visit	Other Fibrosis	0
95	Diffusion Impaired (≤80% DLCO)	Moderate Restriction (51-70% TLC)	Baseline Long COVID Clinic Visit	Bronchiectasis	1
95	Diffusion Impaired (≤80% DLCO)	Moderate Restriction (51-70% TLC)	Baseline Long COVID Clinic Visit	Consolidation	0
95	Diffusion Impaired (≤80% DLCO)	Moderate Restriction (51-70% TLC)	Baseline Long COVID Clinic Visit	Emphysema	0
105	Diffusion Impaired (≤80% DLCO)	Moderate Restriction (51-70% TLC)	Baseline Long COVID Clinic Visit	Ground Glass Opacities	1
105	Diffusion Impaired (≤80% DLCO)	Moderate Restriction (51-70% TLC)	Baseline Long COVID Clinic Visit	Reticulations	1
105	Diffusion Impaired (≤80% DLCO)	Moderate Restriction (51-70% TLC)	Baseline Long COVID Clinic Visit	Other Fibrosis	1
105	Diffusion Impaired (≤80% DLCO)	Moderate Restriction (51-70% TLC)	Baseline Long COVID Clinic Visit	Bronchiectasis	1
105	Diffusion Impaired (≤80% DLCO)	Moderate Restriction (51-70% TLC)	Baseline Long COVID Clinic Visit	Consolidation	0
105	Diffusion Impaired (≤80% DLCO)	Moderate Restriction (51-70% TLC)	Baseline Long COVID Clinic Visit	Emphysema	0
114	Diffusion Impaired (≤80% DLCO)	Moderate Restriction (51-70% TLC)	Baseline Long COVID Clinic Visit	Ground Glass Opacities	1
114	Diffusion Impaired (≤80% DLCO)	Moderate Restriction (51-70% TLC)	Baseline Long COVID Clinic Visit	Reticulations	1
114	Diffusion Impaired (≤80% DLCO)	Moderate Restriction (51-70% TLC)	Baseline Long COVID Clinic Visit	Other Fibrosis	1
114	Diffusion Impaired (≤80% DLCO)	Moderate Restriction (51-70% TLC)	Baseline Long COVID Clinic Visit	Bronchiectasis	1
114	Diffusion Impaired (≤80% DLCO)	Moderate Restriction (51-70% TLC)	Baseline Long COVID Clinic Visit	Consolidation	0
114	Diffusion Impaired (≤80% DLCO)	Moderate Restriction (51-70% TLC)	Baseline Long COVID Clinic Visit	Emphysema	0
119	Diffusion Impaired (≤80% DLCO)	Mild Restriction (71-80% TLC)	Baseline Long COVID Clinic Visit	Ground Glass Opacities	1
119	Diffusion Impaired (≤80% DLCO)	Mild Restriction (71-80% TLC)	Baseline Long COVID Clinic Visit	Reticulations	1
119	Diffusion Impaired (≤80% DLCO)	Mild Restriction (71-80% TLC)	Baseline Long COVID Clinic Visit	Other Fibrosis	1
119	Diffusion Impaired (≤80% DLCO)	Mild Restriction (71-80% TLC)	Baseline Long COVID Clinic Visit	Bronchiectasis	0
119	Diffusion Impaired (≤80% DLCO)	Mild Restriction (71-80% TLC)	Baseline Long COVID Clinic Visit	Consolidation	0
119	Diffusion Impaired (≤80% DLCO)	Mild Restriction (71-80% TLC)	Baseline Long COVID Clinic Visit	Emphysema	0
138	Diffusion Impaired (≤80% DLCO)	Severe Restriction (≤50% TLC)	Baseline Long COVID Clinic Visit	Ground Glass Opacities	1
138	Diffusion Impaired (≤80% DLCO)	Severe Restriction (≤50% TLC)	Baseline Long COVID Clinic Visit	Reticulations	1
138	Diffusion Impaired (≤80% DLCO)	Severe Restriction (≤50% TLC)	Baseline Long COVID Clinic Visit	Other Fibrosis	1
138	Diffusion Impaired (≤80% DLCO)	Severe Restriction (≤50% TLC)	Baseline Long COVID Clinic Visit	Bronchiectasis	0
138	Diffusion Impaired (≤80% DLCO)	Severe Restriction (≤50% TLC)	Baseline Long COVID Clinic Visit	Consolidation	0
138	Diffusion Impaired (≤80% DLCO)	Severe Restriction (≤50% TLC)	Baseline Long COVID Clinic Visit	Emphysema	0
140	Diffusion Impaired (≤80% DLCO)	Moderate Restriction (51-70% TLC)	Baseline Long COVID Clinic Visit	Ground Glass Opacities	1
140	Diffusion Impaired (≤80% DLCO)	Moderate Restriction (51-70% TLC)	Baseline Long COVID Clinic Visit	Reticulations	1
140	Diffusion Impaired (≤80% DLCO)	Moderate Restriction (51-70% TLC)	Baseline Long COVID Clinic Visit	Other Fibrosis	1
140	Diffusion Impaired (≤80% DLCO)	Moderate Restriction (51-70% TLC)	Baseline Long COVID Clinic Visit	Bronchiectasis	1
140	Diffusion Impaired (≤80% DLCO)	Moderate Restriction (51-70% TLC)	Baseline Long COVID Clinic Visit	Consolidation	0
140	Diffusion Impaired (≤80% DLCO)	Moderate Restriction (51-70% TLC)	Baseline Long COVID Clinic Visit	Emphysema	0
148	Diffusion Impaired (≤80% DLCO)	Moderate Restriction (51-70% TLC)	Baseline Long COVID Clinic Visit	Ground Glass Opacities	0
148	Diffusion Impaired (≤80% DLCO)	Moderate Restriction (51-70% TLC)	Baseline Long COVID Clinic Visit	Reticulations	1
148	Diffusion Impaired (≤80% DLCO)	Moderate Restriction (51-70% TLC)	Baseline Long COVID Clinic Visit	Other Fibrosis	0
148	Diffusion Impaired (≤80% DLCO)	Moderate Restriction (51-70% TLC)	Baseline Long COVID Clinic Visit	Bronchiectasis	0
148	Diffusion Impaired (≤80% DLCO)	Moderate Restriction (51-70% TLC)	Baseline Long COVID Clinic Visit	Consolidation	0
148	Diffusion Impaired (≤80% DLCO)	Moderate Restriction (51-70% TLC)	Baseline Long COVID Clinic Visit	Emphysema	0
151	Diffusion Impaired (≤80% DLCO)	Severe Restriction (≤50% TLC)	Baseline Long COVID Clinic Visit	Ground Glass Opacities	1
151	Diffusion Impaired (≤80% DLCO)	Severe Restriction (≤50% TLC)	Baseline Long COVID Clinic Visit	Reticulations	1
151	Diffusion Impaired (≤80% DLCO)	Severe Restriction (≤50% TLC)	Baseline Long COVID Clinic Visit	Other Fibrosis	1
151	Diffusion Impaired (≤80% DLCO)	Severe Restriction (≤50% TLC)	Baseline Long COVID Clinic Visit	Bronchiectasis	0
151	Diffusion Impaired (≤80% DLCO)	Severe Restriction (≤50% TLC)	Baseline Long COVID Clinic Visit	Consolidation	0
151	Diffusion Impaired (≤80% DLCO)	Severe Restriction (≤50% TLC)	Baseline Long COVID Clinic Visit	Emphysema	0
153	Diffusion Impaired (≤80% DLCO)	Moderate Restriction (51-70% TLC)	Baseline Long COVID Clinic Visit	Ground Glass Opacities	1
153	Diffusion Impaired (≤80% DLCO)	Moderate Restriction (51-70% TLC)	Baseline Long COVID Clinic Visit	Reticulations	1
153	Diffusion Impaired (≤80% DLCO)	Moderate Restriction (51-70% TLC)	Baseline Long COVID Clinic Visit	Other Fibrosis	1
153	Diffusion Impaired (≤80% DLCO)	Moderate Restriction (51-70% TLC)	Baseline Long COVID Clinic Visit	Bronchiectasis	1
153	Diffusion Impaired (≤80% DLCO)	Moderate Restriction (51-70% TLC)	Baseline Long COVID Clinic Visit	Consolidation	1
153	Diffusion Impaired (≤80% DLCO)	Moderate Restriction (51-70% TLC)	Baseline Long COVID Clinic Visit	Emphysema	0
168	Diffusion Impaired (≤80% DLCO)	Moderate Restriction (51-70% TLC)	Baseline Long COVID Clinic Visit	Ground Glass Opacities	1
168	Diffusion Impaired (≤80% DLCO)	Moderate Restriction (51-70% TLC)	Baseline Long COVID Clinic Visit	Reticulations	1
168	Diffusion Impaired (≤80% DLCO)	Moderate Restriction (51-70% TLC)	Baseline Long COVID Clinic Visit	Other Fibrosis	1
168	Diffusion Impaired (≤80% DLCO)	Moderate Restriction (51-70% TLC)	Baseline Long COVID Clinic Visit	Bronchiectasis	0
168	Diffusion Impaired (≤80% DLCO)	Moderate Restriction (51-70% TLC)	Baseline Long COVID Clinic Visit	Consolidation	0
168	Diffusion Impaired (≤80% DLCO)	Moderate Restriction (51-70% TLC)	Baseline Long COVID Clinic Visit	Emphysema	0
174	Diffusion Impaired (≤80% DLCO)	Severe Restriction (≤50% TLC)	Baseline Long COVID Clinic Visit	Ground Glass Opacities	1
174	Diffusion Impaired (≤80% DLCO)	Severe Restriction (≤50% TLC)	Baseline Long COVID Clinic Visit	Reticulations	1
174	Diffusion Impaired (≤80% DLCO)	Severe Restriction (≤50% TLC)	Baseline Long COVID Clinic Visit	Other Fibrosis	1
174	Diffusion Impaired (≤80% DLCO)	Severe Restriction (≤50% TLC)	Baseline Long COVID Clinic Visit	Bronchiectasis	1
174	Diffusion Impaired (≤80% DLCO)	Severe Restriction (≤50% TLC)	Baseline Long COVID Clinic Visit	Consolidation	0
174	Diffusion Impaired (≤80% DLCO)	Severe Restriction (≤50% TLC)	Baseline Long COVID Clinic Visit	Emphysema	0
188	Diffusion Impaired (≤80% DLCO)	Moderate Restriction (51-70% TLC)	Baseline Long COVID Clinic Visit	Ground Glass Opacities	0
188	Diffusion Impaired (≤80% DLCO)	Moderate Restriction (51-70% TLC)	Baseline Long COVID Clinic Visit	Reticulations	0
188	Diffusion Impaired (≤80% DLCO)	Moderate Restriction (51-70% TLC)	Baseline Long COVID Clinic Visit	Other Fibrosis	0
188	Diffusion Impaired (≤80% DLCO)	Moderate Restriction (51-70% TLC)	Baseline Long COVID Clinic Visit	Bronchiectasis	0
188	Diffusion Impaired (≤80% DLCO)	Moderate Restriction (51-70% TLC)	Baseline Long COVID Clinic Visit	Consolidation	0
188	Diffusion Impaired (≤80% DLCO)	Moderate Restriction (51-70% TLC)	Baseline Long COVID Clinic Visit	Emphysema	0
189	Diffusion Impaired (≤80% DLCO)	Moderate Restriction (51-70% TLC)	Baseline Long COVID Clinic Visit	Ground Glass Opacities	1
189	Diffusion Impaired (≤80% DLCO)	Moderate Restriction (51-70% TLC)	Baseline Long COVID Clinic Visit	Reticulations	1
189	Diffusion Impaired (≤80% DLCO)	Moderate Restriction (51-70% TLC)	Baseline Long COVID Clinic Visit	Other Fibrosis	0
189	Diffusion Impaired (≤80% DLCO)	Moderate Restriction (51-70% TLC)	Baseline Long COVID Clinic Visit	Bronchiectasis	0
189	Diffusion Impaired (≤80% DLCO)	Moderate Restriction (51-70% TLC)	Baseline Long COVID Clinic Visit	Consolidation	0
189	Diffusion Impaired (≤80% DLCO)	Moderate Restriction (51-70% TLC)	Baseline Long COVID Clinic Visit	Emphysema	0
196	Diffusion Impaired (≤80% DLCO)	Mild Restriction (71-80% TLC)	Baseline Long COVID Clinic Visit	Ground Glass Opacities	1
196	Diffusion Impaired (≤80% DLCO)	Mild Restriction (71-80% TLC)	Baseline Long COVID Clinic Visit	Reticulations	1
196	Diffusion Impaired (≤80% DLCO)	Mild Restriction (71-80% TLC)	Baseline Long COVID Clinic Visit	Other Fibrosis	1
196	Diffusion Impaired (≤80% DLCO)	Mild Restriction (71-80% TLC)	Baseline Long COVID Clinic Visit	Bronchiectasis	1
196	Diffusion Impaired (≤80% DLCO)	Mild Restriction (71-80% TLC)	Baseline Long COVID Clinic Visit	Consolidation	0
196	Diffusion Impaired (≤80% DLCO)	Mild Restriction (71-80% TLC)	Baseline Long COVID Clinic Visit	Emphysema	0
27	Diffusion Impaired (≤80% DLCO)	Moderate Restriction (51-70% TLC)	Baseline Long COVID Clinic Visit	Ground Glass Opacities	1
27	Diffusion Impaired (≤80% DLCO)	Moderate Restriction (51-70% TLC)	Baseline Long COVID Clinic Visit	Reticulations	1
27	Diffusion Impaired (≤80% DLCO)	Moderate Restriction (51-70% TLC)	Baseline Long COVID Clinic Visit	Other Fibrosis	1
27	Diffusion Impaired (≤80% DLCO)	Moderate Restriction (51-70% TLC)	Baseline Long COVID Clinic Visit	Bronchiectasis	0
27	Diffusion Impaired (≤80% DLCO)	Moderate Restriction (51-70% TLC)	Baseline Long COVID Clinic Visit	Consolidation	0
27	Diffusion Impaired (≤80% DLCO)	Moderate Restriction (51-70% TLC)	Baseline Long COVID Clinic Visit	Emphysema	0
96	Diffusion Impaired (≤80% DLCO)	Moderate Restriction (51-70% TLC)	Baseline Long COVID Clinic Visit	Ground Glass Opacities	0
96	Diffusion Impaired (≤80% DLCO)	Moderate Restriction (51-70% TLC)	Baseline Long COVID Clinic Visit	Reticulations	1
96	Diffusion Impaired (≤80% DLCO)	Moderate Restriction (51-70% TLC)	Baseline Long COVID Clinic Visit	Other Fibrosis	0
96	Diffusion Impaired (≤80% DLCO)	Moderate Restriction (51-70% TLC)	Baseline Long COVID Clinic Visit	Bronchiectasis	1
96	Diffusion Impaired (≤80% DLCO)	Moderate Restriction (51-70% TLC)	Baseline Long COVID Clinic Visit	Consolidation	0
96	Diffusion Impaired (≤80% DLCO)	Moderate Restriction (51-70% TLC)	Baseline Long COVID Clinic Visit	Emphysema	0
104	Diffusion Impaired (≤80% DLCO)	Moderate Restriction (51-70% TLC)	Baseline Long COVID Clinic Visit	Ground Glass Opacities	1
104	Diffusion Impaired (≤80% DLCO)	Moderate Restriction (51-70% TLC)	Baseline Long COVID Clinic Visit	Reticulations	1
104	Diffusion Impaired (≤80% DLCO)	Moderate Restriction (51-70% TLC)	Baseline Long COVID Clinic Visit	Other Fibrosis	1
104	Diffusion Impaired (≤80% DLCO)	Moderate Restriction (51-70% TLC)	Baseline Long COVID Clinic Visit	Bronchiectasis	0
104	Diffusion Impaired (≤80% DLCO)	Moderate Restriction (51-70% TLC)	Baseline Long COVID Clinic Visit	Consolidation	0
104	Diffusion Impaired (≤80% DLCO)	Moderate Restriction (51-70% TLC)	Baseline Long COVID Clinic Visit	Emphysema	0
109	Diffusion Impaired (≤80% DLCO)	Moderate Restriction (51-70% TLC)	Baseline Long COVID Clinic Visit	Ground Glass Opacities	0
109	Diffusion Impaired (≤80% DLCO)	Moderate Restriction (51-70% TLC)	Baseline Long COVID Clinic Visit	Reticulations	0
109	Diffusion Impaired (≤80% DLCO)	Moderate Restriction (51-70% TLC)	Baseline Long COVID Clinic Visit	Other Fibrosis	0
109	Diffusion Impaired (≤80% DLCO)	Moderate Restriction (51-70% TLC)	Baseline Long COVID Clinic Visit	Bronchiectasis	0
109	Diffusion Impaired (≤80% DLCO)	Moderate Restriction (51-70% TLC)	Baseline Long COVID Clinic Visit	Consolidation	0
109	Diffusion Impaired (≤80% DLCO)	Moderate Restriction (51-70% TLC)	Baseline Long COVID Clinic Visit	Emphysema	0
115	Diffusion Impaired (≤80% DLCO)	Moderate Restriction (51-70% TLC)	Baseline Long COVID Clinic Visit	Ground Glass Opacities	0
115	Diffusion Impaired (≤80% DLCO)	Moderate Restriction (51-70% TLC)	Baseline Long COVID Clinic Visit	Reticulations	1
115	Diffusion Impaired (≤80% DLCO)	Moderate Restriction (51-70% TLC)	Baseline Long COVID Clinic Visit	Other Fibrosis	0
115	Diffusion Impaired (≤80% DLCO)	Moderate Restriction (51-70% TLC)	Baseline Long COVID Clinic Visit	Bronchiectasis	0
115	Diffusion Impaired (≤80% DLCO)	Moderate Restriction (51-70% TLC)	Baseline Long COVID Clinic Visit	Consolidation	1
115	Diffusion Impaired (≤80% DLCO)	Moderate Restriction (51-70% TLC)	Baseline Long COVID Clinic Visit	Emphysema	0
